# Supplementary material
Source: publisher figshare collection journal article supplement (https://gsajournals.figshare.com/ndownloader/files/14387618)
Supplement: Supplementary file 1 [file 14387618]

## Sheet: Table S3
Table S3. The information of 24,330 SNPs.
Marker	Major_allele	Minor_allele	LA0114	LA0373	LA0391	LA0397	LA0400	LA0417	LA0442	LA1236	LA1237	LA1245	LA1246	LA1256	LA1261	LA1279	LA1280	LA1301	LA1335	LA1348	LA1349	LA1371	LA1375	LA1380	LA1381	LA1382	LA1466	LA1469	LA1471	LA1478	LA1514	LA1521	LA1547	LA1576	LA1577	LA1578	LA1579	LA1580	LA1581	LA1582	LA1583	LA1584	LA1585	LA1586	LA1587	LA1589	LA1590	LA1591	LA1593
SSL2.50ch00_1143661	T	A	TT	TT	TT	TT	TT	TT	TT	NN	TT	AT	AA	TT	TT	TT	AT	TT	TT	TT	AT	TT	TT	TT	TT	AT	TT	TT	TT	TT	TT	TT	TT	TT	TT	TT	TT	TT	TT	TT	TT	TT	TT	TT	TT	TT	TT	NN	AT
SSL2.50ch00_3086004	C	T	NN	CC	CC	TT	TT	CC	CC	CC	NN	CC	CC	CC	CC	CC	CC	CC	CC	CC	CC	CC	CC	CC	CC	CC	CC	CC	CC	CC	CC	CC	CC	CC	CC	CC	CC	CC	CC	CC	CC	CC	CC	CC	CC	CC	CC	CC	CC
SSL2.50ch00_3641105	A	T	AA	AA	AA	AA	AA	TT	AA	AA	TT	TT	TT	TT	TT	TT	TT	AA	AA	AA	AA	NN	TT	TT	AA	AA	AA	TA	AA	AA	NN	NN	AA	AA	AA	AA	AA	AA	AA	AA	AA	AA	AA	AA	AA	AA	AA	AA	AA
SSL2.50ch00_4263006	C	T	NN	TT	CC	NN	CC	NN	NN	CC	NN	NN	CC	NN	NN	CC	NN	TT	CC	CC	CC	CC	NN	NN	CC	CC	TT	CC	TT	CC	CC	CC	CC	CC	CC	CC	CC	NN	CC	CC	CC	CC	TT	CC	CC	CC	CC	CC	CC
SSL2.50ch00_4310217	G	T	GG	GG	TT	GG	GG	GG	GG	GG	GG	GG	GG	GG	GG	GG	GG	GG	GG	GG	GG	GG	GG	GG	GG	GG	GG	GG	GG	TT	GG	GG	GG	GG	TT	GG	GG	GG	GG	GG	GG	GG	GG	GG	GG	GG	GG	GG	GG
SSL2.50ch00_4313972	T	C	CC	TT	CC	TT	CC	CC	TT	CC	CC	CC	TT	CC	CC	CC	CC	TT	CC	CC	CC	TT	CC	TT	CC	CC	TC	CC	CC	TC	TT	TT	TT	TT	CC	CC	CC	CC	CC	CC	CC	CC	TT	CC	TT	TT	TC	CC	TT
SSL2.50ch00_4427214	C	G	CC	CC	CC	CC	GC	GC	CC	CC	CC	GC	CC	GC	GC	CC	GC	CC	CC	CC	CC	CC	CC	CC	CC	NN	CC	CC	NN	CC	CC	CC	CC	CC	CC	CC	CC	CC	CC	CC	CC	CC	CC	CC	CC	CC	CC	CC	CC
SSL2.50ch00_4427220	C	A	CC	CC	CC	CC	CC	CC	CA	CC	CC	CC	CA	CC	CC	CC	CC	CC	CC	CC	CC	CA	CC	CC	CC	CC	CC	CC	NN	CC	CC	CC	CC	CA	CC	CC	CC	CC	CC	CC	CC	CC	CC	CC	CA	CA	CC	CC	CA
SSL2.50ch00_4427223	C	T	CC	CC	TC	CC	TC	TC	TC	CC	TC	TC	TC	TC	TC	TC	TC	CC	CC	TC	TC	TC	TC	CC	TC	TC	CC	TC	NN	TC	CC	NN	CC	TC	TC	TC	CC	CC	TC	CC	CC	CC	CC	CC	TC	TC	TC	TC	TC
SSL2.50ch00_4427226	T	C	CC	CC	TC	CC	TT	TT	TC	TT	TT	TT	TT	TT	TT	TC	TT	CC	CC	TC	TC	TC	TT	TT	TT	TC	CC	TT	NN	TC	CC	NN	CC	TC	TC	TC	CC	CC	TC	CC	CC	TT	CC	CC	TC	TC	TC	TT	TC
SSL2.50ch00_4427229	A	G	AA	AA	GA	AA	GA	GA	GA	AA	GA	GA	GA	GA	GA	GA	GA	AA	AA	GA	GA	GA	GA	AA	GA	GA	AA	GA	NN	GA	AA	NN	AA	GA	GA	GA	AA	AA	GA	AA	AA	AA	AA	AA	GA	GA	GA	GA	GA
SSL2.50ch00_4427230	G	A	GG	GG	GG	GG	GA	GG	GG	GG	GG	GA	GG	GA	GG	GG	GG	GG	GG	GG	GG	GG	GG	GG	GG	GG	GG	GG	NN	GG	GG	GG	GG	GG	GG	GG	GG	GG	GG	GG	GG	GG	GG	GG	GG	GG	GG	GG	GG
SSL2.50ch00_4427233	C	T	TT	TT	TC	TT	CC	CC	TC	CC	CC	CC	CC	CC	CC	TC	CC	TT	TT	TC	TC	TC	CC	CC	CC	TC	TT	CC	NN	TC	TT	NN	TT	TC	TC	TC	TT	TT	TC	TT	TT	CC	TT	TT	TC	TC	TC	CC	TC
SSL2.50ch00_4427239	T	G	TT	TT	TG	TT	TG	TG	TG	TT	TG	TG	TG	TG	TG	TG	TG	TT	TT	TG	TG	TG	TG	TT	TG	TG	TT	TG	NN	TG	TT	NN	TT	TG	TG	TG	TT	TT	TG	TT	TT	TT	TT	TT	TG	TG	TG	TG	TG
SSL2.50ch00_4427250	G	A	AA	AA	GA	AA	GG	GG	GA	GG	GG	GG	GG	GG	GG	GA	GG	AA	AA	GA	GA	GA	GG	GG	GG	GA	AA	GG	NN	GA	AA	NN	AA	GA	GA	GA	AA	AA	GA	AA	AA	GG	AA	AA	GA	GA	GA	GG	GA
SSL2.50ch00_4427255	C	T	CC	CC	TC	CC	TC	TC	TC	CC	TC	TC	TC	TC	TC	TC	TC	CC	CC	TC	TC	TC	TC	CC	TC	TC	CC	TC	NN	TC	CC	NN	CC	TC	TC	TC	CC	CC	TC	CC	CC	CC	CC	CC	TC	TC	TC	TC	TC
SSL2.50ch00_4427265	C	T	CC	CC	CT	CC	CC	NN	CT	CC	CC	NN	CT	CT	CC	CC	CT	CC	CT	CC	CC	CT	CC	CC	CC	CC	CC	CT	CC	CC	CC	CT	CC	CC	CC	CC	CT	CC	NN	CC	CC	CC	CC	CC	CT	CT	CC	CC	CT
SSL2.50ch00_6550092	A	G	AA	AA	AA	AA	AA	AA	AA	AA	AA	AA	AA	AA	AA	AA	AA	AA	AA	AA	AA	AA	AA	AA	AA	AA	GA	AA	GG	AA	AA	AA	AA	AA	AA	AA	AA	AA	AA	AA	AA	AA	AA	AA	AA	AA	AA	NN	NN
SSL2.50ch00_6556529	T	G	TT	TT	NN	GG	TT	TT	TT	TT	TT	TT	TT	NN	TT	TT	TT	TT	TT	TT	TT	TT	TT	TT	TT	TT	TG	TT	GG	TT	TT	TT	TT	TT	TT	TT	GG	NN	GG	GG	TT	GG	TT	GG	TT	TT	TT	TT	TT
SSL2.50ch00_6556632	T	C	TT	CC	TT	TT	TT	TT	TT	TT	NN	TT	TT	NN	TT	TT	CT	TT	CT	TT	TT	TT	TT	CC	TT	TT	CC	TT	TT	CT	CC	TT	CC	CC	TT	TT	TT	TT	TT	TT	TT	TT	TT	TT	TT	TT	TT	TT	CC
SSL2.50ch00_6558379	A	T	TT	AA	AA	TT	TT	AA	TT	TT	AA	TT	TT	TT	AA	TT	AT	AA	AA	AA	TT	AA	TT	AA	TT	TT	TT	AA	TT	AT	AA	AA	AA	AA	AA	AA	TT	AT	TT	TT	TT	TT	AA	AA	AA	AA	TT	AA	AA
SSL2.50ch00_6566987	C	G	CC	CC	CC	CC	CC	GG	CC	CC	GG	CC	CC	CC	GG	CC	CC	CC	CC	CC	CC	CC	CC	CC	CC	CC	CC	CC	CC	CC	CC	CC	CC	CC	CC	CC	CC	CC	CC	CC	CC	CC	CC	CC	CC	CC	CC	CC	CC
SSL2.50ch00_6677835	T	C	TT	TT	TT	TT	TT	TT	TT	TT	TT	TT	TT	TT	TT	TT	TT	TT	TT	TT	TT	TT	TT	TT	TT	TT	TT	TT	TT	CT	TT	TT	TT	TT	TT	TT	TT	CT	TT	TT	TT	TT	TT	CC	TT	TT	CC	TT	CC
SSL2.50ch00_6706352	C	T	CC	CC	TT	TT	TT	CC	CC	TT	CC	CC	CC	CC	CC	CC	CC	CC	CC	CC	TT	CC	CC	CC	CC	TC	TC	TC	TT	TT	CC	CC	CC	CC	CC	CC	TT	CC	CC	TT	TT	TT	CC	TT	TC	CC	CC	CC	CC
SSL2.50ch00_6706387	A	G	AA	AA	AA	AA	GG	AA	AA	AA	AA	AA	AA	AA	AA	AA	AA	AA	AA	AA	AA	AA	AA	AA	AA	AA	AA	AA	AA	AA	AA	AA	AA	AA	AA	AA	AA	AA	AA	AA	AA	AA	AA	AA	AA	AA	AA	AA	AA
SSL2.50ch00_6706473	A	T	AA	AA	TT	TT	TT	AA	AA	TT	AA	AA	AA	AA	AA	AA	AA	AA	AA	AA	TT	AA	AA	AA	AA	AT	AA	AT	TT	TT	AA	AA	AA	AA	AA	AA	TT	AA	AA	TT	TT	TT	AA	TT	AT	AA	AA	AA	AA
SSL2.50ch00_6717521	G	T	GG	GG	GG	GG	GG	GG	GG	GG	GG	GG	GG	GG	GG	GG	GG	GG	TT	TT	GG	GG	GG	GG	GG	GG	GG	GG	GG	GG	GG	GG	GG	GG	GG	TT	GG	GG	GG	GG	GG	GG	GG	GG	GT	GG	GG	TT	GG
SSL2.50ch00_6717544	C	T	CC	CC	CC	CC	CC	CC	CC	CC	CC	CC	CC	CC	CC	CC	CC	CC	TT	TT	CC	CC	CC	CC	CC	CC	CC	CC	CC	CC	CC	CC	CC	CC	CC	TT	CC	CC	CC	CC	CC	CC	CC	CC	CT	TT	CC	TT	CC
SSL2.50ch00_6740771	T	C	TT	TT	TT	TT	TT	CC	TT	TT	TT	TT	TT	CC	TC	CC	TC	TT	TT	TT	TT	TT	CC	TT	TT	TT	TT	TT	TT	TT	TT	TT	TT	TT	TT	TT	TT	TT	TT	TT	TT	TT	TT	TT	TT	TT	TT	TT	TT
SSL2.50ch00_6740772	G	A	GG	GG	GG	AA	GG	GG	GG	GG	GG	GG	GG	GG	GG	GG	GG	GG	GG	GG	GG	GG	GG	GG	GG	GG	GG	GG	AA	GG	GG	GG	GG	GG	GG	GG	GG	GA	AA	GG	GG	GA	GG	GG	GG	GG	AA	GG	AA
SSL2.50ch00_6740778	G	T	GG	GG	TT	GG	GG	GG	TT	TT	GG	GG	GG	GG	GG	GG	GG	GG	TG	GG	GG	GG	GG	GG	GG	GG	GG	TG	GG	TT	GG	GG	GG	GG	GG	GG	GG	GG	GG	GG	GG	GG	GG	GG	TG	GG	GG	GG	GG
SSL2.50ch00_6740834	T	A	TT	TT	TT	AA	TT	TT	TT	TT	TT	TT	TT	TT	TT	TT	TT	TT	TT	TT	TT	TT	TT	TT	TT	TT	TT	TT	AA	TT	TT	TT	TT	TT	TT	TT	TT	TA	AA	TT	TT	TA	TT	TT	TT	TT	AA	TT	AA
SSL2.50ch00_6740837	A	C	AA	CC	AA	AA	AA	AA	AA	AA	AA	AA	AA	AA	AA	AA	CA	AA	AA	AA	AA	AA	AA	CC	AA	AA	AA	AA	AA	AA	CC	AA	CC	CC	AA	AA	AA	AA	AA	AA	AA	AA	AA	AA	AA	AA	AA	AA	AA
SSL2.50ch00_6740857	A	G	AA	AA	AA	GG	AA	AA	AA	AA	AA	AA	AA	AA	AA	AA	AA	AA	AA	AA	AA	AA	AA	AA	AA	AA	AA	AA	GG	AA	AA	AA	AA	AA	AA	AA	AA	AG	GG	AA	AA	AG	AA	AA	AA	AA	GG	AA	GG
SSL2.50ch00_7043180	A	C	AA	AA	AA	AA	AA	CA	AA	AA	CC	AA	CA	CC	AA	CA	AA	NN	AA	AA	AA	AA	CA	NN	AA	AA	AA	AA	CA	CA	NN	NN	AA	AA	NN	AA	AA	AA	AA	AA	AA	AA	AA	AA	AA	AA	AA	NN	AA
SSL2.50ch00_7043279	A	C	AA	AA	NN	NN	AA	AA	AC	AA	AA	AC	AC	AA	AA	AA	AA	NN	AC	AA	AA	AA	AA	NN	AA	AC	AC	AA	AC	AA	NN	AA	NN	AA	NN	AA	AA	AA	AA	AA	AA	AA	AA	AA	AC	AA	AA	AA	AA
SSL2.50ch00_7687641	G	A	GG	GG	AG	GG	GG	AG	GG	AG	AG	GG	GG	GG	GG	GG	GG	GG	GG	GG	GG	GG	GG	GG	GG	AG	NN	GG	GG	GG	GG	GG	GG	GG	NN	GG	GG	GG	GG	GG	GG	GG	GG	GG	GG	GG	GG	GG	GG
SSL2.50ch00_8428727	C	T	CC	CT	CC	CC	CC	CC	CC	CC	CC	CC	CC	CC	CC	CT	CT	CC	CC	CC	CC	CC	CC	CC	CT	CC	CC	CC	CC	CC	CT	CC	CC	CT	NN	CC	CC	CC	CC	CT	CT	CT	CC	CC	CC	CC	CC	CC	CC
SSL2.50ch00_8428770	C	T	CC	CC	CC	CC	CC	CT	CC	CC	CT	CT	CT	CC	CC	CC	CC	CC	CC	CC	CC	CC	CC	CC	CC	CC	CC	NN	CC	CC	CC	CC	CC	CC	NN	CC	CC	CC	CC	CC	CT	CC	CC	CC	CC	CC	CC	CC	CC
SSL2.50ch00_8428773	A	T	AT	AT	AT	AT	AT	AA	AA	AA	AA	AA	AA	AA	AA	AT	AA	AT	AT	AA	AA	AA	AA	AA	AT	AA	AA	AA	AA	NN	AT	AA	AA	AA	NN	AA	AA	AA	AT	AT	AT	AT	NN	AT	AA	AA	AA	AA	AT
SSL2.50ch00_8484805	A	T	AA	AA	AA	AA	AA	TT	AA	AA	TT	AA	AA	TT	AA	TT	AT	AA	AA	AA	AA	AA	TT	AA	AA	AA	AA	AA	AA	AA	AA	AA	AA	AA	AA	AA	AA	AA	AA	AA	AA	AA	AA	AA	AA	AA	AA	AA	AA
SSL2.50ch00_8491842	T	C	TT	TT	TT	TT	TT	TT	TT	TT	TT	TT	TT	TT	TT	TT	TT	CC	TT	NN	TT	CC	TT	TT	TT	TT	TT	TT	NN	TT	TT	CC	TT	TT	TT	TT	TT	TT	TT	NN	TT	TT	CC	TT	NN	TT	TT	TT	TT
SSL2.50ch00_8491937	G	T	GG	GG	GG	GG	GG	GG	NN	GG	GG	GG	GG	GG	GG	GG	GG	GG	GG	GG	GG	GG	GG	GG	GG	GG	GG	GG	NN	GG	GG	NN	GG	GG	GG	GG	GG	GG	GG	NN	GG	GG	GG	GG	GG	GG	GG	GG	NN
SSL2.50ch00_8762805	G	A	GG	GG	GG	GG	GG	GG	GG	GG	AA	AA	GG	AA	AA	GG	AA	GG	GG	GG	GG	GG	AA	GG	GG	GG	GG	GG	GG	GG	GG	GG	GG	GG	GG	GG	GG	GG	GG	GG	GG	GG	GG	GG	GG	GG	GG	GG	GG
SSL2.50ch00_8775888	G	C	GG	GC	CC	CC	GC	GG	GG	CC	GG	GG	GG	NN	GG	GG	GG	GG	GG	GG	CC	GG	GG	GG	GG	NN	GG	CC	GG	GG	GG	GG	GG	GG	GG	GG	GG	GC	GG	GC	GC	GG	GG	NN	GG	GG	GG	CC	GG
SSL2.50ch00_8793902	C	T	CC	CC	CC	CC	CC	CC	CC	CC	TT	CC	CC	CC	TT	CC	TT	CC	CC	CC	CC	CC	TT	CC	CC	CC	CC	CC	CC	CC	CC	CC	CC	CC	CC	CC	CC	CC	CC	CC	CC	CC	CC	CC	CC	CC	CC	CC	CC
SSL2.50ch00_8797925	T	C	TT	CC	CC	TT	TT	TT	CC	CC	CC	TT	TT	TT	CC	TT	CC	TT	TT	CC	TT	TT	CC	TT	CC	TT	TT	CC	TT	TT	TT	TT	TT	TT	TT	TT	CC	TC	TT	TC	TC	CC	TT	CC	TT	TT	TT	TT	TT
SSL2.50ch00_8823144	C	A	CC	CC	CC	CC	CC	CC	CC	CC	CC	AA	CC	AA	CC	CC	AA	CC	CC	CC	CC	CC	AA	CC	CC	CC	CC	CC	CC	CC	CC	CC	CC	CC	CC	CC	CC	CC	CC	CC	CC	CC	CC	CC	CC	CC	CC	CC	CC
SSL2.50ch00_8823250	C	G	CC	CC	NN	CC	CC	NN	CC	CC	NN	CC	CC	CC	CC	CC	CC	CC	CC	CC	GG	CC	CC	NN	CC	CC	CC	GG	NN	CG	CC	CC	CC	CC	GG	CC	CC	CC	CC	NN	CC	CC	CC	CC	CC	GG	CC	CC	NN
SSL2.50ch00_8824363	G	T	GG	GG	GG	GG	GG	GG	GG	GG	TT	GG	GG	GG	GG	GG	GG	GG	GG	GG	GG	NN	GG	GG	TT	TT	GG	GG	GG	GG	GG	GG	GG	GG	GG	NN	GG	TG	GG	NN	GG	GG	GG	GG	GG	GG	GG	GG	GG
SSL2.50ch00_11258482	A	C	AA	AA	AA	AA	AA	NN	CA	AA	AA	AA	CA	CA	CA	CA	CA	AA	AA	NN	CC	NN	AA	NN	AA	CA	CA	AA	CA	AA	NN	NN	AA	AA	AA	NN	AA	AA	AA	NN	AA	AA	AA	AA	CC	AA	AA	AA	AA
SSL2.50ch00_11448074	C	T	CC	CC	TC	CC	CC	TC	CC	TC	TC	CC	CC	CC	CC	CC	CC	CC	CC	CC	CC	CC	CC	CC	CC	TC	NN	CC	CC	CC	CC	NN	CC	CC	TC	CC	CC	CC	CC	TC	CC	CC	CC	CC	CC	CC	CC	NN	CC
SSL2.50ch00_11455332	C	A	AC	NN	AC	CC	AC	NN	CC	CC	AC	CC	CC	CC	NN	CC	CC	AC	CC	CC	NN	CC	NN	CC	CC	AC	AC	AC	CC	CC	CC	CC	CC	AC	CC	CC	CC	CC	AC	NN	AC	AC	CC	AC	CC	CC	CC	AC	CC
SSL2.50ch00_11813603	T	C	TT	TT	NN	TT	TT	CC	TT	TT	CC	NN	CC	NN	CC	TT	TT	TT	TT	TT	NN	TT	TC	TT	TT	CC	TT	NN	TT	TT	TT	TT	TT	TT	TT	TT	TT	TT	TT	TT	NN	TT	TT	TT	TT	NN	TT	TT	NN
SSL2.50ch00_11813681	T	A	TT	TT	NN	TT	TT	AA	TT	TT	AA	NN	AA	NN	AA	TT	TT	TT	TT	TT	NN	TT	TA	TT	TT	AA	TT	NN	TT	TT	TT	TT	TT	TT	TT	TT	TT	TT	TT	TT	NN	TT	TT	TT	TT	NN	TT	TT	NN
SSL2.50ch00_12327862	T	C	TT	TT	TT	TT	TT	CC	TT	TT	CC	TT	CC	NN	TT	TT	TT	TT	TT	TT	TT	TT	TT	NN	TT	NN	TT	TT	TT	TT	TT	TT	TT	TT	TT	TT	TT	TT	TT	TT	TT	TT	TT	TT	TT	TT	TT	TT	TT
SSL2.50ch00_12327930	A	C	AA	AA	CC	NN	AC	NN	AA	AA	NN	AA	AA	AA	AA	NN	NN	AA	AA	AA	AA	AA	AA	NN	AA	AA	NN	CC	AA	AA	AA	AA	AA	AA	NN	NN	AA	AA	AA	AA	AA	AA	AA	AA	AA	AA	AA	AA	CC
SSL2.50ch00_12327935	A	G	AA	AA	AA	NN	AA	NN	AA	AA	NN	AA	AA	AA	AA	NN	NN	AA	AA	AA	AA	AA	AA	NN	AA	AA	NN	AA	AA	AA	GG	AA	GG	GG	NN	NN	AA	AA	AA	AA	AA	AA	AA	AA	AA	AA	AA	AA	AA
SSL2.50ch00_12327983	G	T	GG	GG	GG	NN	GG	NN	GG	GG	NN	GG	TT	GG	GG	NN	NN	GG	GG	GG	GG	GG	GG	NN	GG	GT	NN	GG	GG	GG	GG	GG	GG	GG	NN	NN	GG	GG	GG	GG	GG	GG	GG	GG	GG	GG	GG	GG	GG
SSL2.50ch00_12435906	C	G	CC	CC	CC	CC	NN	CC	CC	CG	CC	CC	CC	CC	CC	CG	GG	CC	CC	CC	CC	CC	CC	CC	CC	CC	CC	CC	CC	CG	GG	CC	GG	CG	CC	CC	CC	NN	CC	CC	NN	NN	CC	CC	CC	CC	CC	CC	CC
SSL2.50ch00_12460778	G	A	NN	NN	GG	GG	GG	GG	GG	GG	NN	AG	GG	AA	GG	GG	GG	NN	NN	GG	GG	GG	GG	GG	GG	AG	GG	GG	GG	GG	GG	GG	GG	GG	NN	GG	NN	GG	GG	GG	GG	GG	NN	GG	GG	GG	GG	GG	GG
SSL2.50ch00_13332460	G	A	GG	GG	GG	GG	GG	AA	GG	GG	AA	GG	GG	GG	AA	NN	NN	GG	GG	GG	GG	GG	NN	GG	GG	GG	GG	GG	GG	GG	GG	NN	GG	GG	GG	GG	GG	GG	GG	GG	GG	GG	NN	GG	GG	GG	GG	GG	GG
SSL2.50ch00_13332477	A	G	GG	AA	AA	AA	AA	AA	GG	GG	AA	AA	AA	AA	AA	NN	NN	AA	AA	AA	AA	GG	NN	GG	AA	AA	AG	AA	GG	GG	AA	NN	AA	AA	GG	GG	GG	GG	GG	AA	GG	GG	NN	GG	AG	GG	GG	GG	GG
SSL2.50ch00_13332509	T	G	TT	TT	TT	TT	TT	GG	TT	TT	GG	TT	TT	TT	GG	NN	NN	TT	TT	TT	TT	TT	NN	TT	TT	TT	TT	TT	TT	TT	TT	NN	TT	TT	TT	TT	TT	TT	TT	TT	TT	TT	NN	TT	TT	TT	TT	TT	TT
SSL2.50ch00_13332660	C	T	CC	CC	CC	CC	CC	TT	CC	CC	TT	CT	CC	CC	CC	CC	CC	CC	CC	CC	CC	CC	CC	CC	CC	CC	CC	CC	CC	CC	CC	CC	CC	CC	CC	CC	CC	CC	CC	CC	CC	CC	CC	CC	CC	CC	CC	CC	CC
SSL2.50ch00_13385987	C	G	CC	NN	CC	CC	CC	CC	CC	CC	NN	CC	CC	CC	CC	CC	CC	NN	CC	NN	CC	GC	CC	GG	CC	CC	CC	CC	CC	CC	CC	CC	CC	NN	CC	CC	CC	CC	NN	CC	CC	CC	NN	CC	CC	CC	GC	CC	CC
SSL2.50ch00_13386001	G	A	GG	NN	GG	GG	GG	GG	GG	GG	NN	GG	GG	GG	GG	GG	GG	NN	GG	NN	GG	GG	GG	GG	GG	GG	GG	GG	GG	GG	GG	GG	GG	NN	GG	GG	GG	GG	NN	GG	GA	GG	NN	GG	GG	GG	GA	GA	AA
SSL2.50ch00_13386115	A	T	AT	NN	AT	AA	AA	AT	AA	AA	NN	AA	AA	AA	AT	AA	AA	NN	AA	NN	AA	AA	AA	AT	AA	AT	AT	AA	AA	NN	AT	AT	AA	TT	AA	AA	AA	AA	TT	AT	AT	AA	NN	AA	AA	TT	AT	AT	AA
SSL2.50ch00_13386946	G	A	NN	NN	GG	GG	AG	GG	AA	AG	GG	NN	GG	NN	GG	GG	GG	GG	GG	GG	GG	NN	GG	NN	AG	GG	GG	AG	AG	AG	AA	NN	AG	AA	GG	NN	AA	AG	AG	GG	GG	AG	GG	GG	GG	GG	GG	GG	GG
SSL2.50ch00_13386969	C	T	NN	NN	CC	CC	CT	CC	TT	CT	CC	NN	CC	NN	CC	CC	CC	CC	CC	CC	CC	NN	CC	NN	CT	CC	CC	CT	CT	CT	TT	NN	CT	TT	CC	NN	CC	CT	CC	CC	CC	CC	CC	CC	CC	CC	CC	CC	CC
SSL2.50ch00_13530959	C	T	CC	CC	CC	CC	CC	CC	CC	CC	CC	CC	CC	CC	CC	CC	CC	TT	CC	CC	CC	CC	TT	CC	CC	CC	TC	CC	CC	CC	CC	CC	CC	CC	CC	CC	CC	CC	CC	CC	CC	CC	CC	CC	CC	CC	CC	CC	CC
SSL2.50ch00_13532130	A	T	AA	AA	AA	AA	TT	NN	AA	AA	NN	TA	AA	TT	TT	NN	TT	AA	AA	AA	AA	AA	AA	NN	AA	TT	AA	AA	AA	NN	NN	AA	AA	AA	AA	NN	TA	AA	AA	AA	AA	TA	AA	AA	AA	AA	AA	AA	AA
SSL2.50ch00_13532198	A	G	AA	AA	AA	AA	GG	NN	AA	AA	NN	GA	GG	GG	GG	NN	GG	AA	AA	AA	AA	AA	AA	NN	AA	GG	AA	AA	AA	NN	NN	AA	AA	AA	AA	NN	GA	AA	AA	AA	AA	GA	AA	AA	AA	AA	AA	AA	AA
SSL2.50ch00_13650396	G	C	GG	CC	GG	GG	GG	GG	GG	GG	NN	GG	GG	GG	GG	GG	GG	GG	GG	GG	GG	GG	GG	GG	CC	GG	GG	GG	GG	GG	GG	GG	GG	GG	GG	GG	GG	GG	GG	GG	GG	GG	GG	GG	GG	CC	GG	GG	GG
SSL2.50ch00_13650457	G	C	GG	GG	GG	GG	GG	GG	GG	GG	NN	GG	GG	GG	GG	GG	GG	GG	GG	GG	GG	CC	GG	GG	GG	GG	GG	GG	GG	GG	CC	GG	CC	GG	GG	GG	GG	GG	GG	GG	GG	GG	GG	GG	GG	GG	GG	GG	GG
SSL2.50ch00_13650458	A	G	AA	AA	AA	AA	AA	AA	AA	AA	NN	GA	GG	GG	GG	GG	GG	AA	AA	AA	AA	AA	GG	GG	AA	NN	AA	AA	AA	GA	AA	AA	AA	AA	AA	AA	AA	AA	AA	AA	AA	AA	AA	AA	AA	AA	AA	AA	AA
SSL2.50ch00_13851977	A	G	AA	AG	AA	AA	AA	AG	AG	AG	AA	AG	AG	AA	AG	AA	AA	AA	AG	GG	AA	AA	AG	AG	AG	AG	AG	AA	AG	AA	AA	AA	AA	AG	AA	AA	AA	NN	AA	AG	AG	AA	AA	AG	AA	AA	AA	AA	AA
SSL2.50ch00_13851979	C	A	CC	CC	CC	CC	CC	CC	CC	CC	CC	CC	AC	CC	CC	AC	CC	AA	CC	CC	CC	CC	CC	CC	CC	CC	CC	CC	CC	CC	CC	AA	CC	CC	CC	CC	CC	CC	CC	CC	CC	CC	AA	CC	CC	CC	CC	CC	CC
SSL2.50ch00_13851991	T	C	TT	CT	CT	TT	TT	CT	CT	CT	TT	CT	CT	TT	CT	CT	TT	TT	CT	CC	CT	TT	CT	CT	CT	CT	CT	TT	CT	CT	TT	TT	TT	CT	TT	TT	TT	CT	TT	CT	CT	TT	TT	CT	TT	CT	TT	TT	CT
SSL2.50ch00_13852035	G	T	GG	GT	GG	GG	GG	GG	GG	GT	GG	GG	GT	GG	GT	GT	GG	GG	GT	NN	GG	GG	GT	GG	GT	GG	GT	GG	GT	GT	GG	GG	GG	GT	GG	GG	GG	GT	GG	GT	GT	GG	GG	GT	GG	GG	GG	GG	GG
SSL2.50ch00_14643707	G	A	GG	GG	AA	AA	GG	AA	GG	AA	AA	AG	GG	AA	GG	AA	GG	AA	AG	GG	GG	GG	GG	GG	AG	GG	GG	GG	GG	GG	AA	GG	AA	GG	GG	AA	AG	GG	GG	GG	AG	AA	AA	AA	GG	AA	GG	AG	AA
SSL2.50ch00_14656268	T	C	CC	TT	TT	TT	TT	CC	TT	TT	TC	TT	TT	TT	CC	TT	TC	TT	TT	TT	TT	TT	TT	TT	TT	TT	TT	TT	TT	TT	TT	TT	TT	TT	TT	TT	TT	TT	TT	TT	TT	TT	TT	TT	TT	TT	TT	TT	TT
SSL2.50ch00_15026616	G	T	GG	GG	GG	GG	GG	GG	GG	GG	GG	GG	GG	GG	GG	NN	GG	GG	GG	NN	GG	NN	TG	GG	GG	GG	TG	GG	GG	GG	GG	TT	GG	GG	TT	GG	GG	GG	GG	GG	GG	GG	TT	GG	GG	GG	GG	TT	GG
SSL2.50ch00_15026659	G	C	GG	GG	GG	GG	GG	GG	GG	GG	GG	GG	GG	GG	GG	GG	GG	GG	GG	GG	GG	GG	GG	GG	GG	GG	GG	GG	GG	GG	GG	GG	GG	GG	GG	GG	GG	GG	GG	GG	GG	GG	GG	GG	GG	GG	GG	GG	GG
SSL2.50ch00_15386468	C	T	CC	CC	NN	CC	CC	CC	NN	CC	TT	TT	TT	TT	NN	NN	CC	CC	CC	NN	CC	CC	TC	TT	TT	CC	CC	TT	CC	CC	CC	CC	CC	CC	TT	NN	CC	CC	CC	CC	CC	CC	CC	CC	CC	CC	CC	TT	NN
SSL2.50ch00_15386567	A	T	AA	AA	NN	AA	AA	AA	NN	AA	AA	AA	NN	AA	NN	NN	AA	TT	AA	NN	AA	AA	AT	AA	AA	AA	AT	AA	AA	AA	AA	AA	AA	AA	AA	AA	AA	NN	AA	AA	AA	AA	TT	AA	AA	AA	AA	AA	NN
SSL2.50ch00_15386571	G	A	GG	GG	NN	GG	GG	GG	NN	GG	GG	GG	NN	GG	NN	NN	GG	GG	GG	NN	GG	GG	GG	GG	GG	GG	GG	GG	GG	GG	GG	GG	GG	GG	GG	GG	AA	GG	GG	GG	AG	GG	GG	GG	AG	GG	GG	GG	NN
SSL2.50ch00_15386598	C	T	CC	CT	NN	CC	CT	CC	NN	CT	CC	CC	NN	CC	NN	NN	CT	CC	CT	NN	CC	CT	CC	CC	CC	CC	CC	CC	CC	CC	CT	CC	TT	CT	CC	CC	CC	CC	CT	CC	CC	TT	CC	CC	CC	TT	CC	CC	NN
SSL2.50ch00_15386634	T	G	TT	GT	NN	TT	GT	TT	NN	GT	TT	TT	NN	TT	NN	NN	GT	TT	GT	NN	TT	GT	TT	TT	TT	TT	TT	TT	TT	TT	GT	TT	GG	GT	TT	TT	TT	TT	GT	TT	TT	GG	TT	TT	TT	GG	TT	TT	NN
SSL2.50ch00_15402832	G	A	AA	AA	AA	GG	GG	AA	GG	GG	AA	GG	GG	GG	GG	GG	GG	AA	GG	GG	GG	GG	AA	AA	AA	GG	AA	AG	AA	AG	GG	GG	GG	GG	AA	GG	GG	AA	AG	GG	AG	GG	AA	GG	AG	GG	AA	AA	GG
SSL2.50ch00_15483998	C	T	TT	CC	CC	CC	CC	CC	CC	CC	CC	CC	CC	CC	CC	CC	CC	CC	TC	TT	CC	CC	CC	CC	CC	CC	CC	CC	CC	CC	CC	CC	CC	CC	CC	CC	CC	CC	CC	CC	CC	CC	CC	CC	CC	CC	CC	CC	CC
SSL2.50ch00_15985585	A	G	AA	AA	NN	NN	GG	AA	AA	AA	NN	AA	AA	AA	AA	AA	AA	AA	AA	AA	AA	AA	GG	GG	GG	AA	GG	NN	AA	NN	AA	GG	AA	AA	AA	NN	GG	AA	AA	AA	AA	AA	AA	GG	AA	GG	AG	AA	AA
SSL2.50ch00_16053099	C	G	CG	CG	CG	CG	CG	CG	CG	CG	CG	CG	CG	CG	CG	CG	CG	CG	CG	CG	CG	CG	CG	CG	CG	CG	CG	CG	CG	CG	CG	CG	CG	CG	CG	CG	CG	CG	CG	CG	CG	CG	CG	CG	CG	CG	CG	CG	CG
SSL2.50ch00_16135439	C	A	CC	CC	CC	CC	CC	CC	CC	CC	CC	CC	CC	CC	CC	CC	CC	CC	CC	CC	CC	CC	CC	AA	CC	CC	CC	CC	CC	CC	CC	CC	CC	CC	CC	CC	CC	CC	CC	CC	CC	CC	CC	CC	CC	CC	CC	CC	CC
SSL2.50ch00_16207338	G	T	GG	GG	GG	GG	TT	GG	TT	GG	GG	TT	GG	TT	GG	TT	TT	GG	TG	TT	TT	GG	TG	TG	GG	TT	TG	GG	TT	TG	GG	TT	GG	TT	GG	TT	TT	TT	TG	TT	GG	TT	GG	TT	GG	GG	GG	GG	GG
SSL2.50ch00_16207342	A	G	AA	AA	AA	AA	GG	AA	GG	AA	AA	GG	AA	GG	AA	GG	GG	AA	GA	GG	GG	AA	GA	GA	AA	GG	GA	AA	GG	GA	AA	GG	AA	GG	AA	GG	GG	GG	GA	GG	AA	GG	AA	GG	AA	AA	AA	AA	AA
SSL2.50ch00_16207497	G	C	GG	GG	GG	GG	CC	GG	CC	GG	GG	CC	GG	CC	GG	CC	CC	GG	CG	CC	CC	GG	CG	CG	GG	CC	CG	GG	CC	CG	GG	CC	GG	CC	GG	CC	CC	CC	CG	CC	GG	CC	GG	CC	GG	GG	GG	GG	GG
SSL2.50ch00_16501352	G	A	GG	GG	GA	GA	GG	GG	GG	GG	GG	GG	GG	GG	GG	GA	NN	NN	GG	GG	AA	GA	GG	GG	GG	GG	NN	GG	GA	GG	GG	GG	GG	GG	NN	GA	NN	GG	GA	GA	GA	GA	GA	NN	GA	GG	GA	GA	GG
SSL2.50ch00_16501403	A	G	AA	AA	AA	AA	AA	NN	AA	AA	AA	GA	GA	GA	AA	AA	NN	NN	AA	GA	AA	AA	AA	AA	AA	AA	AA	AA	AA	AA	AA	AA	AA	AA	NN	AA	NN	AA	AA	AA	AA	AA	AA	NN	AA	AA	AA	AA	AA
SSL2.50ch00_16689428	T	C	TT	CC	TT	TT	TT	TT	TT	CC	TT	TT	TT	TT	TT	CC	TT	TT	CT	TT	TT	TT	TT	TT	TT	TT	CT	CT	TT	TT	TT	TT	TT	TT	TT	TT	TT	CC	TT	TT	CC	TT	TT	TT	CC	TT	TT	TT	TT
SSL2.50ch00_16693773	G	A	GG	GG	AA	GG	GG	GA	GG	GG	GG	GG	AA	GG	GG	GG	GA	GG	GG	GA	GG	GG	GA	GG	AA	GG	GA	GG	AA	AA	AA	GG	AA	AA	GG	AA	GG	GA	GG	GG	GG	AA	AA	AA	GA	GG	GG	GG	GG
SSL2.50ch00_16696449	A	T	AA	AA	TT	AA	AA	AT	AA	AA	AA	AA	TT	AA	AA	NN	NN	AA	AT	AT	AA	AA	TT	AA	TT	AA	NN	AA	TT	NN	TT	AA	TT	TT	AA	TT	AA	TT	AA	AA	AA	TT	TT	TT	AT	AA	AA	AA	AA
SSL2.50ch00_16696475	A	G	AA	AA	GG	AA	AA	AG	AA	AA	AA	AA	GG	AA	AA	NN	NN	AA	AG	AG	AA	AA	GG	AA	GG	AA	NN	AA	GG	NN	GG	AA	GG	GG	AA	GG	AA	GG	AA	AA	AA	GG	GG	GG	AG	AA	AA	AA	AA
SSL2.50ch00_17089448	G	A	GG	GG	GG	GA	GG	GG	GG	GA	GG	GG	GG	NN	GG	GG	GG	GG	GA	GA	GG	GG	GG	GG	GG	GG	GG	GG	GG	GG	GG	GG	GG	GG	GG	GG	GG	GG	GG	GA	GG	GG	GG	GA	GG	GG	GG	GG	GG
SSL2.50ch00_17089502	T	C	TT	CC	CC	TC	TC	TT	CC	TC	NN	TT	TC	NN	TT	TC	TT	TC	TC	TC	TT	TT	TC	TT	CC	TC	TC	TC	TC	TC	TT	TT	TT	TC	CC	TT	TC	TC	CC	TC	TC	TT	TT	TC	CC	TC	TC	CC	TT
SSL2.50ch00_17698597	C	T	CC	CC	CC	CC	CC	CC	CC	CC	TT	CT	CC	TT	TT	CC	CT	CC	CC	CC	CC	CC	CC	CC	CC	CC	CC	CT	CC	CC	CC	CC	CC	CC	CC	CC	CC	CC	CC	CC	CC	CC	CC	CC	CC	CC	CC	CC	CC
SSL2.50ch00_17698602	T	A	TT	TT	TT	TT	TT	TT	TT	TT	TT	TT	TT	TT	TT	TT	TT	AA	TT	TT	TT	TT	TT	TT	TT	TT	AT	TT	TT	TT	TT	AA	TT	TT	TT	TT	TT	TT	TT	TT	AT	TT	AA	TT	TT	TT	TT	TT	TT
SSL2.50ch00_17698603	G	T	GG	GG	GG	GG	GG	GG	GG	GG	TT	GT	GG	TT	TT	GG	GT	GG	GG	GG	GG	GG	GG	GG	GG	GG	GG	GT	GG	GG	GG	GG	GG	GG	GG	GG	GG	GG	GG	GG	GG	GG	GG	GG	GG	GG	GG	GG	GG
SSL2.50ch00_17698608	C	T	CC	CC	CC	CC	CC	CC	CC	CC	TT	CT	CC	TT	TT	CC	CT	CC	CC	CC	CC	CC	CC	CC	CC	CC	CC	CT	CC	CC	CC	CC	CC	CC	CC	CC	CC	CC	CC	CC	CC	CC	CC	CC	CC	CC	CC	CC	CC
SSL2.50ch00_17698609	A	G	AA	AA	AA	AA	AA	AA	AA	AA	GG	AG	AA	GG	GG	AA	AG	AA	AA	AA	AA	AA	AA	AA	AA	AA	AA	AG	AA	AA	AA	AA	AA	AA	AA	AA	AA	AA	AA	AA	AA	AA	AA	AA	AA	AA	AA	AA	AA
SSL2.50ch00_17698621	C	T	CC	CC	CC	CC	CC	CC	CC	CC	TT	CT	CC	TT	TT	CC	CT	CC	CC	CC	CC	CC	CC	CC	CC	CC	CC	CT	CC	CC	CC	CC	CC	CC	CC	CC	CC	CC	CC	CC	CC	CC	CC	CC	CC	CC	CC	CC	CC
SSL2.50ch00_17698623	A	T	AA	AA	AA	AA	AA	AA	AA	AA	TT	AT	AA	TT	TT	AA	AT	AA	AA	AA	AA	AA	AA	AA	AA	AA	AA	AT	AA	AA	AA	AA	AA	AA	AA	AA	AA	AA	AA	AA	AA	AA	AA	AA	AA	AA	AA	AA	AA
SSL2.50ch00_17698627	A	T	AA	AA	AA	AA	AA	AA	AA	AA	TT	AT	AA	TT	TT	AA	AT	AA	AA	AA	AA	AA	AA	AA	AA	AA	AA	AT	AA	AA	AA	AA	AA	AA	AA	AA	AA	AA	AA	AA	AA	AA	AA	AA	AA	AA	AA	AA	AA
SSL2.50ch00_17698631	C	T	CC	CC	CC	CC	CC	CC	CC	CC	TT	CT	CC	TT	TT	CC	CT	CC	CC	CC	CC	CC	CC	CC	CC	CC	CC	CT	CC	CC	CC	CC	CC	CC	CC	CC	CC	CC	CC	CC	CC	CC	CC	CC	CC	CC	CC	CC	CC
SSL2.50ch00_17698634	C	T	CC	CC	CC	CC	CC	CC	CC	CC	TT	CT	CC	TT	TT	CC	CT	CC	CC	CC	CC	CC	CC	CC	CC	CC	CC	CT	CC	CC	CC	CC	CC	CC	CC	CC	CC	CC	CC	CC	CC	CC	CC	CC	CC	CC	CC	CC	CC
SSL2.50ch00_17698636	T	C	TT	TT	TT	TT	TT	TT	TT	TT	CC	CT	TT	CC	CC	TT	CT	TT	TT	TT	TT	TT	TT	TT	TT	TT	TT	CT	TT	TT	TT	TT	TT	TT	TT	TT	TT	TT	TT	TT	TT	TT	TT	TT	TT	TT	TT	TT	TT
SSL2.50ch00_17947166	G	A	GA	NN	AA	NN	GA	GA	GA	GG	GG	GA	GA	GG	GG	GA	GA	GA	GA	GA	GG	GA	GA	GA	GA	GA	GA	GA	GA	GA	GA	GA	GA	GA	GA	GA	GA	GA	GG	GG	GA	GA	GA	GA	GA	GA	GA	GA	GA
SSL2.50ch00_18048780	A	T	AA	AA	TA	AA	AA	TT	AA	AA	TA	TA	TA	AA	TA	AA	AA	AA	AA	AA	AA	TA	TT	TT	AA	AA	AA	TA	AA	TA	NN	AA	AA	TA	AA	AA	AA	AA	AA	AA	AA	AA	AA	AA	AA	TT	AA	AA	AA
SSL2.50ch00_18048822	A	T	AA	AA	TA	AA	AA	TT	AA	AA	TA	TA	TA	AA	TA	AA	AA	AA	AA	AA	AA	TA	TT	TT	AA	AA	AA	TA	AA	TA	NN	AA	AA	TA	AA	AA	AA	AA	AA	AA	AA	AA	AA	AA	AA	TT	AA	AA	AA
SSL2.50ch00_18048830	A	G	AA	AA	GA	AA	AA	AA	AA	AA	AA	GA	GA	AA	AA	AA	AA	AA	AA	AA	AA	GA	AA	AA	AA	AA	AA	GA	AA	GA	NN	AA	AA	AA	AA	AA	AA	AA	AA	AA	AA	AA	AA	AA	AA	GG	AA	AA	AA
SSL2.50ch00_18048833	C	T	CC	CC	CC	CC	CC	TC	CC	CC	TC	CC	CC	CC	CC	CC	CC	CC	CC	CC	CC	CC	TT	TT	CC	CC	CC	CC	CC	CC	NN	CC	CC	TC	CC	CC	CC	CC	CC	CC	CC	CC	CC	CC	CC	CC	CC	CC	CC
SSL2.50ch00_18048843	C	T	CC	CC	TC	CC	CC	TT	CC	CC	TC	TC	TC	CC	TC	CC	CC	CC	CC	CC	CC	TC	TT	TT	CC	CC	CC	TC	CC	TC	NN	CC	CC	TC	CC	CC	CC	CC	CC	CC	CC	CC	CC	CC	CC	TT	CC	CC	CC
SSL2.50ch00_18048858	A	C	AA	AA	AC	AA	AA	CC	AA	NN	CC	AC	AC	AA	AC	NN	AA	AA	AC	AA	NN	AC	CC	CC	AA	AA	NN	AC	AA	CC	NN	AA	AA	AC	AA	AA	AA	AA	AA	AA	AA	AA	AA	AA	AA	CC	AA	AA	AA
SSL2.50ch00_18048864	T	A	TT	TT	AT	TT	TT	AA	TT	NN	AA	AT	AT	TT	AT	NN	TT	TT	AT	TT	NN	AT	AA	AA	TT	TT	NN	AT	TT	AA	NN	TT	TT	AT	TT	TT	TT	TT	TT	TT	TT	TT	TT	TT	TT	AA	TT	TT	TT
SSL2.50ch00_18048870	C	T	CC	CC	CC	CC	CC	CC	CC	NN	CC	CC	CC	CC	CT	NN	TT	CC	CT	CC	NN	CT	CC	CC	CC	TT	NN	CC	TT	CC	NN	TT	TT	CT	CC	CC	CC	CC	CC	TT	CT	CT	TT	CC	CC	CC	CC	CC	CC
SSL2.50ch00_18048885	T	A	TT	TT	AT	TT	TT	AA	TT	NN	AA	AT	AT	TT	AT	NN	TT	TT	AT	TT	NN	AT	AA	AA	TT	TT	NN	AT	TT	AA	NN	TT	TT	AT	TT	TT	TT	TT	TT	TT	TT	TT	TT	TT	TT	AA	TT	TT	TT
SSL2.50ch00_18048912	T	C	TT	TT	TT	CC	CC	TT	CC	NN	TT	TT	CT	TT	CT	NN	CC	TT	CT	TT	NN	CT	TT	TT	TT	CC	NN	CT	CC	TT	NN	CC	CC	CT	TT	TT	TT	CC	TT	CC	CC	CC	CC	TT	NN	TT	NN	TT	TT
SSL2.50ch00_18428436	C	T	TC	TC	TC	TC	TC	TC	TC	TC	CC	CC	TC	CC	CC	CC	TC	TC	TC	TC	TC	NN	CC	TC	TC	TC	TC	TC	TC	TC	TC	TC	TC	TC	CC	TC	TC	TC	TC	CC	TC	TC	TC	TC	CC	TC	TC	CC	TC
SSL2.50ch00_18428560	G	A	GG	GG	GG	GG	AG	GG	GG	GG	GG	GG	GG	GG	GG	GG	GG	GG	GG	GG	GG	GG	GG	GG	GG	GG	GG	GG	GG	GG	GG	GG	GG	GG	GG	GG	GG	GG	GG	GG	GG	GG	GG	GG	GG	GG	GG	GG	GG
SSL2.50ch00_18428566	T	A	TT	TT	TT	AT	AT	TT	TT	TT	AT	AT	TT	AT	AT	TT	AT	TT	AT	TT	TT	AT	TT	TT	TT	TT	TT	AT	TT	TT	AT	TT	AT	AT	TT	TT	TT	TT	TT	TT	TT	TT	TT	TT	TT	TT	TT	TT	TT
SSL2.50ch00_18428579	T	C	CT	CT	TT	CT	TT	TT	CT	CT	TT	TT	TT	TT	TT	TT	TT	TT	TT	TT	CT	TT	TT	TT	TT	CT	CT	TT	CT	CT	TT	CT	TT	TT	TT	CT	CT	CT	CT	CT	CT	CT	CT	CT	CT	CT	CT	TT	CT
SSL2.50ch00_18479836	C	T	CC	CC	CC	CC	CT	CC	CC	CC	NN	CC	TT	CC	CC	TT	TT	CC	CT	CT	CC	CT	CT	NN	TT	NN	NN	NN	CC	NN	NN	CC	CT	CC	TT	CC	CT	NN	CC	CC	CC	TT	CC	CC	CT	CT	CC	CT	NN
SSL2.50ch00_18479914	C	G	NN	CC	CC	NN	GC	NN	CC	GC	NN	GC	GG	GG	GG	NN	GG	CC	GC	GC	CC	GC	GC	NN	GG	CC	CC	NN	NN	CC	GC	CC	GC	CC	NN	NN	GC	NN	CC	CC	CC	GC	CC	CC	GG	GC	CC	GC	GC
SSL2.50ch00_18728939	A	T	AA	AA	AA	AA	TA	AA	AA	AA	AA	AA	AA	AA	AA	AA	AA	AA	AA	AA	AA	TA	TA	AA	AA	NN	TA	AA	AA	TA	AA	AA	AA	AA	AA	TA	AA	TA	AA	TA	AA	AA	TA	TA	TA	TA	TA	AA	TT
SSL2.50ch00_18729950	T	C	CC	TC	TC	TT	TC	NN	TC	TC	NN	TC	NN	NN	TC	NN	TC	TT	TC	TC	CC	CC	TC	TT	TC	TC	NN	CC	TC	NN	TC	TT	TC	TT	TC	TC	TC	TC	TC	NN	TC	TC	TC	NN	TC	TC	TC	CC	TC
SSL2.50ch00_18729961	T	A	TT	TT	TT	TT	NN	NN	TT	TT	NN	TA	TT	TT	TT	NN	TA	TT	TT	TT	TA	AA	TA	TT	TT	TT	TT	TT	TT	TT	TA	TT	TA	TT	TT	TA	TT	TT	TT	NN	TT	TT	TA	NN	TA	TA	TA	TT	TA
SSL2.50ch00_18730049	T	C	CC	CT	TT	NN	TT	TT	CT	TT	TT	TT	CT	TT	TT	TT	TT	TT	NN	CT	TT	CT	TT	TT	TT	NN	TT	NN	CC	NN	NN	TT	TT	TT	TT	NN	TT	NN	CT	NN	CT	CT	TT	TT	CT	CC	CT	CT	NN
SSL2.50ch00_18730072	C	T	CC	CC	CC	NN	CC	CC	CC	CC	CC	CT	CC	CC	CC	CC	CC	CC	CC	CC	CT	CT	CC	CT	CC	NN	CC	NN	CC	NN	NN	CC	TT	CC	CC	NN	CC	NN	CC	CT	CC	CC	CT	TT	CT	CC	CT	CC	CT
SSL2.50ch00_18730107	C	T	CC	CT	TT	NN	CT	CC	CT	CT	CC	CT	CT	CC	CC	CC	CC	CC	CC	CT	TT	CT	CC	CT	NN	NN	CT	NN	CC	NN	NN	CC	TT	CC	TT	NN	CT	NN	CT	CT	CT	CT	CT	TT	CT	CC	CT	CT	NN
SSL2.50ch00_18730654	A	C	AC	AC	AC	AC	AC	AA	AC	AA	AA	AA	AC	AA	AA	AA	AA	AA	AA	AC	AA	AC	AA	AA	AA	AA	AC	AA	AC	AC	AA	AA	AA	AA	AC	NN	AA	AA	AC	AC	AC	AC	AA	AC	AC	AC	AC	AC	AC
SSL2.50ch00_18924763	A	T	AA	AA	AA	AA	AA	NN	AA	AA	AA	TT	AA	TT	AA	AA	AA	AA	AA	AA	AA	AA	AA	AA	AA	AA	AA	AA	AA	AA	NN	AA	AA	AA	AA	NN	AA	AA	AA	AA	AA	AA	AA	AA	AA	AA	AA	AA	AA
SSL2.50ch00_18924818	G	A	GG	AA	GG	GG	GG	GG	GG	AA	GG	GG	GG	GG	GG	GG	GG	GG	GA	AA	GG	GG	GG	GG	GG	GG	GG	GG	GG	GG	NN	GG	GG	GG	GG	NN	GG	GG	GG	GG	GG	GG	GG	GG	GG	GG	GG	GG	GG
SSL2.50ch00_18992846	C	T	CC	CC	CC	CC	CC	CC	CC	CC	CC	CC	CC	CC	CC	CC	CC	CC	CC	CC	CT	CT	CC	CC	CC	CC	CC	CC	CC	CC	CC	CT	CT	CT	CT	NN	CT	CC	CC	CT	CC	CC	CC	CT	CT	CT	CT	CC	CT
SSL2.50ch00_20647849	G	A	GG	GG	GG	GG	GG	GG	GG	NN	GG	GG	NN	GG	GG	GG	GG	GG	GA	GG	GG	GG	GG	GG	GG	GG	GG	GG	GG	GG	GG	AA	GG	GG	GG	GG	GG	GG	GG	GG	GG	GG	GG	GG	GG	GG	GG	GG	GG
SSL2.50ch00_20647898	A	C	AA	AA	AA	AA	AA	AA	AA	NN	AA	AA	NN	AA	AA	AA	AA	AA	AA	AA	AA	AA	AA	AA	AA	AA	AA	AA	AA	AA	AA	AA	AA	AA	AA	AA	AA	AA	AA	AA	AA	AA	AA	AA	AA	AA	AA	AA	AA
SSL2.50ch00_20648898	C	T	CC	CC	CC	CC	CC	CT	CC	NN	CC	CT	CC	TT	CT	TT	CC	CC	CC	CC	CC	CC	CC	CC	CC	CC	CC	CC	CC	CC	CC	CC	CC	CC	CC	CC	CC	CC	CC	CC	CC	CC	CC	CC	CC	CC	CC	CC	CC
SSL2.50ch00_20879246	T	A	TT	TT	TT	TT	TT	NN	TT	NN	NN	TT	TT	TT	TT	NN	AA	TT	NN	TT	TT	AA	NN	NN	TT	NN	AT	TT	TT	TT	AA	AA	AA	TT	TT	TT	TT	NN	TT	TT	TT	TT	AA	TT	TT	TT	TT	TT	TT
SSL2.50ch01_5444	G	A	GG	GG	GG	AG	GG	NN	GG	AA	AA	GG	GG	GG	AA	AA	AA	AA	AG	GG	GG	GG	AA	AA	GG	GG	GG	GG	GG	GG	AA	AA	AA	GG	AA	GG	GG	GG	GG	GG	GG	GG	AA	GG	GG	AA	GG	AA	GG
SSL2.50ch01_32607	A	G	AA	AA	AA	AA	AA	AA	AA	AA	AA	AA	AA	AA	GG	AA	GA	AA	AA	AA	AA	AA	GG	AA	AA	AA	AA	AA	AA	AA	AA	AA	AA	AA	AA	AA	AA	AA	AA	AA	AA	AA	AA	AA	AA	AA	AA	AA	AA
SSL2.50ch01_32987	C	A	CC	CC	CC	CC	CC	CC	CC	AA	AA	CC	CC	CC	AA	CC	AC	CC	CC	CC	CC	CC	AA	CC	CC	CC	CC	CC	CC	CC	CC	CC	CC	CC	CC	CC	CC	CC	CC	CC	CC	CC	CC	CC	CC	CC	CC	CC	CC
SSL2.50ch01_50106	T	A	TT	TT	TT	TT	TT	TT	TT	AA	AA	TT	TT	TT	AA	AA	AT	TT	TT	TT	TT	TT	AA	AT	TT	TT	TT	TT	TT	TT	TT	TT	TT	TT	TT	TT	TT	NN	TT	TT	TT	TT	TT	TT	TT	TT	TT	TT	TT
SSL2.50ch01_52415	G	A	GG	GG	GG	GG	GG	GG	GG	AA	AA	GG	GG	GG	AA	GG	AG	GG	GG	GG	GG	GG	AA	GG	GG	GG	GG	GG	GG	GG	GG	GG	GG	GG	GG	GG	GG	GG	GG	GG	GG	GG	GG	GG	GG	GG	GG	GG	GG
SSL2.50ch01_52465	T	C	TT	TT	TT	TT	TT	TT	TT	CC	CC	TT	TT	TT	CC	TT	CT	TT	TT	TT	TT	TT	CC	TT	TT	TT	TT	TT	TT	TT	TT	TT	TT	TT	TT	TT	TT	TT	TT	TT	TT	TT	TT	TT	TT	TT	TT	TT	TT
SSL2.50ch01_73052	A	G	AA	AA	AA	AA	AA	AA	AA	AA	AA	AA	GG	AA	AA	AA	AA	AA	AA	AA	AA	GG	AA	AA	AA	GG	AG	AA	AA	AA	AA	AA	AA	GG	AA	AA	AA	AG	AA	AA	AA	AA	AA	AA	AA	AA	AA	AA	AA
SSL2.50ch01_73081	T	C	TT	TT	TT	TT	TT	CC	TT	CC	CC	TT	CC	TT	CC	CC	CT	TT	TT	TT	TT	TT	CC	CT	TT	TT	TT	TT	TT	TT	TT	TT	TT	TT	TT	TT	TT	TT	TT	TT	TT	CT	TT	TT	TT	TT	TT	TT	TT
SSL2.50ch01_92041	G	A	AA	GG	GG	GG	AG	GG	GG	NN	NN	GG	GG	GG	AA	GG	GG	GG	AG	AA	GG	AA	GG	GG	GG	NN	AG	GG	AG	AG	GG	GG	GG	GG	GG	NN	GG	GG	GG	GG	GG	GG	GG	GG	GG	AA	GG	GG	GG
SSL2.50ch01_92053	G	A	AA	GG	GG	GG	AG	GG	GG	NN	NN	GG	GG	GG	AA	GG	GG	GG	AG	AA	GG	AA	GG	GG	GG	NN	AG	GG	AG	AG	GG	GG	GG	GG	GG	NN	GG	GG	GG	GG	GG	GG	GG	GG	GG	AA	GG	GG	GG
SSL2.50ch01_106810	G	T	GG	GG	GG	GG	GG	GG	GG	TT	TT	GG	GG	GG	TT	TT	GG	GG	GG	GG	GG	GG	GG	TG	TT	GG	GG	GG	GG	GG	GG	GG	GG	GG	GG	GG	GG	GG	GG	GG	GG	GG	GG	GG	GG	GG	GG	GG	GG
SSL2.50ch01_133728	A	T	AA	TT	AA	AA	AA	AA	TT	AA	AA	AA	AA	AA	AA	AA	AA	AA	AA	AA	AA	AA	AA	AA	AA	AA	AA	AA	AA	AA	AA	AA	AA	AA	AA	AA	AA	TA	AA	AA	AA	AA	AA	AA	AA	AA	AA	AA	AA
SSL2.50ch01_142357	T	A	AA	AA	TT	AA	AA	TT	AA	TT	TT	TT	TT	TT	TT	TT	TT	TT	NN	NN	AA	NN	TT	TT	AA	TT	TA	AA	TA	AA	NN	TT	TT	NN	AA	TT	TT	NN	AA	TT	AA	AA	AA	NN	NN	AA	NN	AA	NN
SSL2.50ch01_142477	G	C	GG	GG	CC	GG	GG	GG	GG	GG	GG	CG	CC	GG	GG	GG	CC	CC	CG	GG	GG	CC	CC	CG	GG	CC	GG	GG	CG	GG	CC	CC	CC	CC	GG	CC	GG	CG	GG	CC	GG	GG	GG	GG	GG	GG	GG	GG	GG
SSL2.50ch01_169256	A	G	AA	AA	AA	AA	AA	AA	AA	GG	GG	AG	AA	GG	GG	GG	AG	AA	AA	AA	AA	AA	GG	AG	AA	AA	AA	AA	AA	AA	AA	AA	AA	AA	AA	AA	AA	AA	AA	AA	AA	AA	AA	AA	AA	AA	AA	AA	AA
SSL2.50ch01_175063	G	A	GG	GG	GG	AG	AG	GG	GG	AA	AA	AA	AA	AA	AA	AA	GG	GG	GG	GG	AA	GG	GG	AG	GG	GG	GG	GG	GG	GG	GG	GG	GG	GG	GG	GG	GG	GG	GG	GG	GG	GG	GG	GG	GG	GG	GG	GG	GG
SSL2.50ch01_191638	G	A	GG	GG	GG	GG	GG	AA	GG	AA	AA	AA	AA	AA	AA	AA	AG	GG	GG	GG	GG	GG	AA	AG	GG	GG	GG	GG	GG	GG	GG	GG	GG	GG	GG	GG	GG	GG	GG	GG	GG	AG	GG	GG	GG	GG	GG	GG	GG
SSL2.50ch01_197936	G	T	GG	TT	GG	GG	GG	GG	GG	GG	GG	GG	GG	GG	GG	GG	GG	GG	GG	GG	GG	GG	GG	GG	GG	GG	GG	GG	GG	GG	GG	GG	GG	GG	GG	GG	GG	GG	GG	GG	GG	GG	GG	GG	GG	GG	GG	GG	GG
SSL2.50ch01_197948	T	G	TT	TT	TT	TT	TT	GG	TT	GG	GG	TT	GG	TT	GG	GG	TT	TT	TT	TT	TT	TT	TT	TG	TT	TT	TT	TT	TT	TT	TT	TT	TT	TT	TT	TT	TT	TT	TT	TT	TT	TT	TT	TT	TT	TT	TT	TT	TT
SSL2.50ch01_197960	T	C	TT	TT	TT	TT	TT	CC	TT	CC	CC	TT	CC	TT	CC	CC	TT	TT	TT	TT	TT	TT	TT	TC	TT	TT	TT	TT	TT	TT	TT	TT	TT	TT	TT	TT	TT	TT	TT	TT	TT	TT	TT	TT	TT	TT	TT	TT	TT
SSL2.50ch01_197964	A	G	AA	AA	AA	AA	AA	GG	AA	GG	GG	AA	GG	AA	GG	GG	AA	AA	AA	AA	AA	AA	AA	GA	AA	AA	AA	AA	AA	AA	AA	AA	AA	AA	AA	AA	AA	AA	AA	AA	AA	AA	AA	AA	AA	AA	AA	AA	AA
SSL2.50ch01_198817	A	C	AA	AA	AA	AA	AA	CC	AA	AA	CC	AA	CC	AA	AA	AA	AA	AA	AA	AA	AA	AA	AA	AA	AA	AA	AA	AA	AA	AA	AA	AA	AA	AA	AA	AA	AA	AA	AA	AA	AA	AA	AA	AA	AA	AA	AA	AA	AA
SSL2.50ch01_198848	C	T	TT	CC	TT	TT	CC	CC	CC	CC	CC	CC	CC	CC	CC	CC	CC	CC	CC	CC	TT	CC	CC	CC	CC	CC	CC	CC	CT	CC	CC	CC	CC	CC	TT	TT	TT	TT	CT	TT	CC	CT	CC	TT	CT	CC	TT	TT	TT
SSL2.50ch01_198849	G	A	GG	GG	GG	GG	GG	AA	GG	GG	AA	GG	AA	GG	GG	GG	GG	GG	GG	GG	GG	GG	GG	GG	GG	GG	GG	GG	GG	GG	GG	GG	GG	GG	GG	GG	GG	GG	GG	GG	GG	GG	GG	GG	GG	GG	GG	GG	GG
SSL2.50ch01_209849	G	A	GG	GG	GG	GA	GA	GG	AA	GG	GG	GG	GG	GG	GG	GG	GA	GG	GA	GG	AA	AA	GG	GA	GG	GG	AA	AA	AA	NN	AA	AA	AA	AA	AA	GG	GG	GA	GA	GG	GG	AA	AA	AA	GA	AA	AA	AA	GG
SSL2.50ch01_209950	T	G	TT	TT	TT	TT	TT	TT	TT	TT	TT	TT	TT	TT	TT	TT	TT	TT	GT	TT	TT	TT	TT	TT	TT	TT	TT	TT	TT	TT	TT	TT	TT	TT	TT	TT	TT	TT	TT	TT	TT	TT	TT	TT	TT	TT	TT	TT	TT
SSL2.50ch01_243659	G	A	GG	GG	GG	GA	GA	GG	GG	AA	AA	GA	GG	GG	AA	AA	GA	NN	AA	AA	GG	AA	GG	AA	AA	GG	GA	GG	GG	GA	AA	AA	AA	AA	GG	GG	GG	GG	GG	GG	GG	GG	GG	GG	GA	GG	GG	GG	GG
SSL2.50ch01_243669	T	C	TT	TT	TT	TC	TC	TT	TT	CC	CC	TC	TT	TT	CC	CC	TC	NN	CC	CC	TT	CC	TT	CC	CC	TT	TC	TT	TT	TC	CC	CC	CC	CC	TT	TT	TT	TT	TT	TT	TT	TT	TT	TT	TC	TT	TT	TT	TT
SSL2.50ch01_243696	A	C	AA	AA	AA	CA	CA	AA	AA	CC	CC	CA	AA	AA	CC	CC	CA	NN	CC	CC	AA	CC	AA	CC	CC	AA	CA	AA	AA	CA	CC	CC	CC	CC	AA	AA	AA	AA	AA	AA	AA	AA	AA	AA	CA	AA	AA	AA	AA
SSL2.50ch01_243716	A	G	AA	AA	AA	GA	GA	AA	AA	GG	GG	GA	AA	AA	GG	GG	GA	NN	GG	GG	AA	GG	AA	GG	GG	AA	GA	AA	AA	GA	GG	GG	GG	GG	AA	AA	AA	AA	AA	AA	AA	AA	AA	AA	GA	AA	AA	AA	AA
SSL2.50ch01_243824	T	C	CC	CC	CC	CT	CT	NN	CC	TT	TT	TT	NN	NN	TT	TT	CT	NN	TT	TT	CC	TT	CC	TT	TT	CC	CT	CC	CC	CT	TT	TT	TT	TT	CC	CC	CC	CC	CC	CC	CC	CC	CC	CC	CT	CC	CC	CC	CC
SSL2.50ch01_264385	C	T	CC	CC	CC	CC	CC	CC	CC	CC	CC	CC	CC	CC	CC	CC	CC	CC	CC	CC	CC	CC	CC	CC	CC	CC	CC	CC	CC	CC	CC	CC	CC	CC	CC	CC	CC	CC	CC	CC	CC	CC	CC	CC	CC	CC	CC	CC	CC
SSL2.50ch01_264510	C	T	CC	CC	TT	CT	CT	TT	TT	CC	CC	TT	TT	TT	CC	CC	CC	CC	CT	TT	CC	CC	CC	CC	CC	TT	CT	CC	CC	CT	CC	CC	CC	CC	TT	CC	CC	CT	TT	CC	CC	CT	TT	CC	CC	TT	TT	CC	TT
SSL2.50ch01_319657	T	C	CC	TT	CC	TT	TT	TT	TT	TT	TT	TT	TT	TT	TT	TT	TT	TT	CC	CC	TT	TT	TT	TT	TT	TT	TT	TT	TT	TT	TT	TT	TT	TT	TT	TT	TT	TT	TT	TT	TT	TT	TT	TT	CT	TT	TT	TT	TT
SSL2.50ch01_335780	C	T	CC	TT	TT	CC	CC	CC	TT	CC	CC	CC	CC	CC	CC	CC	CC	TT	CT	CC	CC	TT	CC	CC	CC	TT	CT	CC	CC	CC	CC	TT	CC	CC	CC	CC	TT	CC	CC	CC	CC	CC	CC	CC	CC	CC	TT	CC	CC
SSL2.50ch01_352731	T	A	TT	TT	TT	TT	TT	TT	AA	TT	TT	TT	TT	TT	TT	TT	TT	TT	TA	AA	TT	TT	TT	TT	TT	AA	TT	TT	TT	TT	TT	TT	TT	TT	TT	TT	TT	AA	TA	AA	TT	TT	TT	AA	TT	TT	TT	TT	TT
SSL2.50ch01_352732	T	A	TT	TT	TT	TT	TT	TT	AA	TT	TT	TT	TT	TT	TT	TT	TT	TT	TA	AA	TT	TT	TT	TT	TT	AA	TT	TT	TT	TT	TT	TT	TT	TT	TT	TT	TT	AA	TA	AA	TT	TT	TT	AA	TT	TT	TT	TT	TT
SSL2.50ch01_352733	T	A	TT	TT	TT	TT	TT	TT	AA	TT	TT	TT	TT	TT	TT	TT	TT	TT	TA	AA	TT	TT	TT	TT	TT	AA	TT	TT	TT	TT	TT	TT	TT	TT	TT	TT	TT	AA	TA	AA	TT	TT	TT	AA	TT	TT	TT	TT	TT
SSL2.50ch01_352758	T	G	TT	TT	TT	TT	TT	TT	GG	TT	TT	TT	TT	TT	TT	TT	TT	TT	TG	GG	TT	TT	TT	TT	TT	GG	TT	TT	TT	TT	TT	TT	TT	TT	TT	TT	TT	GG	TG	GG	TT	TT	TT	GG	TT	TT	TT	TT	TT
SSL2.50ch01_352836	A	G	AA	AA	AA	AA	AA	GG	NN	GG	GG	GG	GG	GG	GG	GG	AG	AA	AG	NN	AA	AA	GG	AA	AA	NN	AA	AA	AA	AA	AA	AA	AA	AA	AA	AA	GG	NN	AA	NN	AA	AA	AA	NN	AA	AA	AA	AA	AA
SSL2.50ch01_360662	C	T	CC	TT	CC	CT	CC	NN	TT	TT	TT	TT	TT	TT	TT	TT	NN	CC	CC	CC	CC	CC	TT	NN	TT	CC	NN	CC	CC	CC	CC	CC	CC	CC	CC	NN	TT	CC	CC	CC	CT	CC	CC	TT	CC	CC	CC	CC	CC
SSL2.50ch01_362092	C	G	CC	CC	CC	CC	CC	CC	CC	CC	CC	CC	CC	CC	CC	CC	CC	CC	CC	CC	CC	CC	CC	CC	CC	CC	CC	CC	CC	CC	CC	CC	CC	CC	GG	CC	CC	CC	CC	CC	CC	CC	GG	CC	CC	CC	CC	GG	GG
SSL2.50ch01_363858	A	G	AA	GG	AA	AG	AA	AA	GG	AA	AA	GG	GG	GG	AA	GG	AG	AA	AA	AA	AA	AA	GG	AA	AA	AA	AA	AA	AA	AA	AA	AA	AA	AA	AA	AA	GG	AG	AA	AA	AG	AA	AA	AA	AA	AA	AA	AA	AA
SSL2.50ch01_370358	T	C	CC	TT	CC	CC	CT	TT	TT	TT	TT	TT	TT	TT	TT	TT	CT	TT	TT	TT	CC	TT	TT	CT	CC	TT	TT	CC	CT	CC	TT	TT	TT	TT	TT	TT	TT	TT	CT	TT	TT	CC	TT	CC	CT	CC	TT	CC	TT
SSL2.50ch01_370418	G	A	GG	GG	GG	GG	GG	GG	GG	AA	AA	GG	GG	GG	AA	GG	GG	GG	GG	GG	GG	GG	GG	GG	GG	GG	GG	GG	GG	GG	GG	GG	GG	GG	GG	GG	GG	GG	GG	GG	GG	GG	GG	GG	GG	GG	GG	GG	GG
SSL2.50ch01_422672	A	G	AA	AA	AA	GG	AG	GG	AA	GG	GG	GG	GG	GG	GG	GG	AG	AA	AA	AA	AA	AA	GG	AG	AA	AA	AG	AA	AA	AG	AA	AA	AA	AA	AA	GG	GG	AG	AA	AA	AA	AA	AA	AA	AA	AA	AA	AA	AA
SSL2.50ch01_422692	A	G	AA	AA	AA	GG	AG	GG	AA	GG	GG	GG	GG	GG	GG	GG	AG	AA	AA	AA	AA	AA	GG	AG	AA	AA	AG	AA	AA	AG	AA	AA	AA	AA	AA	GG	GG	AG	AA	AA	AA	AA	AA	AA	AA	AA	AA	AA	AA
SSL2.50ch01_441608	T	G	TT	TT	GG	GT	GT	NN	TT	TT	NN	TT	GG	TT	GG	GG	GT	TT	TT	TT	TT	TT	GG	GT	GG	TT	GT	TT	TT	TT	NN	TT	TT	TT	TT	TT	GG	GT	GT	TT	GT	TT	GG	TT	GG	TT	TT	TT	TT
SSL2.50ch01_448310	C	T	CC	TT	CC	TT	CT	TT	TT	TT	NN	TT	TT	TT	TT	CC	CC	CC	TT	TT	TT	CC	CC	NN	CC	CC	NN	CT	CC	NN	CC	CC	CC	CC	NN	TT	CC	NN	CT	TT	CC	TT	TT	TT	CT	TT	CC	CC	TT
SSL2.50ch01_448336	A	T	AA	TT	AA	TT	AT	TT	TT	TT	NN	TT	TT	TT	TT	AA	AA	AA	TT	TT	TT	AA	AA	NN	AA	AA	NN	NN	AA	NN	AA	AA	AA	AA	NN	TT	AA	NN	AT	TT	AA	TT	TT	TT	AT	TT	AA	AA	TT
SSL2.50ch01_449409	G	A	GG	AA	GG	NN	GA	AA	AA	AA	NN	AA	AA	AA	AA	GG	GG	NN	AA	AA	AA	GG	GG	GG	GG	GG	GG	GA	GG	GG	GG	GG	GG	GG	AA	AA	GG	GA	GA	AA	GG	AA	AA	AA	GG	AA	GG	GG	AA
SSL2.50ch01_452890	C	A	CC	CC	CC	CC	CC	AA	CC	AA	AA	AA	AA	AA	AA	CC	CC	CC	CC	CC	CC	CC	CC	CC	CC	CC	CC	CC	CC	CC	CC	CC	CC	CC	CC	CC	CC	CC	CC	AA	CC	CC	CC	CC	CC	CC	CC	CC	CC
SSL2.50ch01_452893	G	A	GG	GG	GG	GG	GA	GG	GG	GG	GG	GG	GG	GG	GG	GG	GA	GG	GA	GG	GG	AA	GG	AA	GG	GG	GA	GG	GG	GG	AA	AA	AA	AA	GG	GG	GG	GG	GG	GG	GG	GG	GG	GG	GG	GG	AA	GG	GG
SSL2.50ch01_481069	T	A	TT	AA	TT	TA	AA	TT	AA	TT	TT	TT	TT	TT	TT	TT	TT	TT	TA	AA	AA	AA	TT	TT	TT	AA	TT	AA	TA	TA	TT	TT	TT	TT	TT	TT	TT	TT	TT	AA	TA	TA	TT	TT	TA	TT	TT	TT	TT
SSL2.50ch01_481610	C	A	AA	CC	NN	CC	CC	CC	CC	CC	CC	CC	CC	CC	CC	CC	CC	CC	CC	CC	CC	CC	CC	CC	CC	CC	NN	NN	AC	CC	NN	CC	CC	CC	CC	CC	CC	AC	AC	CC	CC	AC	AA	AA	CC	CC	CC	AA	CC
SSL2.50ch01_483241	T	C	TT	CC	TT	TC	CC	TT	CC	TT	TT	TT	TT	TT	TT	TT	TT	TT	TC	CC	CC	CC	TT	NN	TT	CC	TT	CC	NN	TC	TT	TT	TT	TT	TT	NN	TT	TT	TT	CC	TC	CC	TT	TT	TC	TT	TT	TT	TT
SSL2.50ch01_494390	G	A	AG	GG	GG	AG	AG	GG	GG	AG	GG	GG	GG	GG	GG	GG	GG	GG	GG	AG	GG	GG	GG	GG	AG	AG	GG	AG	GG	AG	GG	GG	GG	NN	AG	AG	GG	GG	GG	GG	AG	GG	GG	GG	AG	AG	AG	AG	GG
SSL2.50ch01_494431	C	T	CC	CC	CC	CT	CC	CC	CC	CC	TT	CT	TT	TT	TT	CC	CT	CC	CT	CT	CT	TT	CC	TT	CC	CC	CC	CC	CT	CC	CC	CC	CC	NN	CT	CC	CC	CT	TT	CC	CC	CC	CC	CC	CC	CC	CC	CT	CC
SSL2.50ch01_500434	T	C	TT	TT	TT	TT	TT	TT	TT	TT	TT	TT	TT	TT	TT	TT	TT	TT	TT	TT	TT	TT	TT	TT	TT	TT	TT	TT	TT	TT	TT	TT	TT	NN	TT	TT	TT	TT	CT	TT	TT	TT	TT	TT	TT	TT	TT	CC	TT
SSL2.50ch01_505564	T	C	TT	TT	TT	TT	TC	TT	TT	TT	CC	TT	CC	TT	CC	CC	TC	TT	TT	TT	TT	TT	CC	TT	TT	TT	TC	TT	TT	TC	TT	TT	TT	TT	TT	TT	TT	TC	TT	TT	TC	TT	TT	TT	TC	TT	TT	TT	TT
SSL2.50ch01_507033	C	T	CC	CC	CC	CC	CT	CC	CC	CC	TT	CC	TT	CC	TT	TT	CT	CC	CC	CC	CC	CC	TT	CT	CC	CC	CT	CC	CC	CT	CC	CC	CC	CC	CC	CC	CC	CT	CC	CC	CT	CC	CC	CC	CT	CC	CC	CC	CC
SSL2.50ch01_530325	A	G	AA	GG	AA	GA	GA	AA	AA	AA	AA	AA	GG	AA	AA	AA	AA	AA	AA	AA	AA	NN	AA	AA	AA	AA	AA	AA	AA	GA	AA	AA	AA	AA	AA	AA	AA	AA	AA	AA	AA	AA	AA	AA	AA	AA	AA	NN	AA
SSL2.50ch01_530357	T	C	TT	TT	TT	TT	TT	TT	CC	TT	TT	TT	TT	TT	TT	TT	TT	TT	TT	TT	TT	NN	TT	TT	TT	TT	TT	TT	TT	TT	TT	TT	TT	TT	TT	TT	TT	TT	TT	TT	TT	TT	TT	TT	TT	TT	TT	TT	TT
SSL2.50ch01_530362	A	T	AA	AA	AA	AA	AA	AA	AA	AA	AA	AA	AA	AA	AA	AA	TA	AA	AA	AA	AA	NN	AA	TT	AA	AA	AA	AA	AA	AA	TT	TT	TT	AA	AA	AA	AA	AA	AA	AA	AA	AA	AA	AA	AA	AA	AA	AA	AA
SSL2.50ch01_530449	T	G	TT	GG	TT	GT	TT	TT	GG	TT	TT	TT	GG	TT	TT	GG	TT	TT	TT	TT	TT	GG	GG	GT	TT	TT	GT	TT	TT	NN	TT	TT	TT	TT	TT	TT	TT	TT	TT	TT	TT	TT	TT	TT	TT	TT	TT	GG	TT
SSL2.50ch01_530453	C	A	CC	AA	CC	AC	CC	CC	CC	CC	CC	CC	AA	CC	CC	AA	CC	CC	CC	CC	CC	AA	AA	AC	CC	CC	CC	CC	CC	NN	CC	CC	CC	CC	CC	CC	CC	CC	CC	CC	CC	CC	CC	CC	CC	CC	CC	AA	CC
SSL2.50ch01_532936	T	C	TT	TT	TT	TT	TT	TT	TT	TT	TT	TT	TT	TT	TT	TT	TT	CC	TC	TT	TT	NN	TT	TT	TT	TT	TT	TT	TT	TT	TT	TT	TT	TT	TT	TT	TT	TT	TT	TT	TT	TT	TT	TT	TT	TT	TT	TT	TT
SSL2.50ch01_537154	T	A	TT	TT	TT	TT	TT	AA	TT	AA	AA	TT	TT	TT	AA	TT	TT	TT	TT	TT	TT	TT	TT	TT	TT	TT	TT	TT	TT	TT	TT	TT	TT	TT	TT	TT	TT	TT	TT	TT	TT	TT	TT	TT	TT	TT	TT	TT	TT
SSL2.50ch01_537174	G	C	GG	CC	GG	CG	CC	CC	GG	CC	CC	CC	CC	CC	CC	CC	CG	GG	GG	GG	CC	CC	CC	CG	GG	CC	CG	GG	GG	CG	GG	GG	GG	GG	GG	GG	GG	GG	GG	GG	GG	GG	GG	GG	GG	GG	GG	CC	CC
SSL2.50ch01_540277	T	A	AA	TT	TT	TT	TT	TT	TT	TT	TT	TT	TT	TT	TT	TT	TT	TT	TT	TT	TT	TT	TT	TT	TT	TT	TT	AT	AT	AT	TT	TT	TT	TT	TT	TT	TT	TT	TT	TT	AT	TT	TT	TT	AT	AA	TT	TT	TT
SSL2.50ch01_591036	A	G	AA	AA	AA	AA	AA	AA	AA	GG	AA	GA	AA	AA	AA	AA	AA	AA	AA	AA	AA	AA	AA	AA	AA	AA	AA	AA	AA	AA	AA	AA	AA	AA	AA	AA	AA	NN	AA	AA	AA	AA	AA	AA	AA	AA	AA	AA	AA
SSL2.50ch01_591098	A	G	AA	AA	AA	AA	AA	AA	AA	AA	AA	AA	AA	AA	AA	AA	AA	AA	AA	NN	AA	AA	AA	AA	AA	AA	AA	AA	AA	AA	AA	AA	AA	AA	GG	GG	AA	AA	AA	GG	GG	AG	GG	AA	AA	AA	AA	AA	AA
SSL2.50ch01_596697	C	G	CC	CC	CC	CC	CC	GG	CC	GG	GG	GG	GG	GG	GG	CC	CC	CC	CC	CC	CC	CC	CC	CC	CC	CC	CC	CC	CC	CC	CC	CC	CC	CC	CC	CC	CC	CC	CC	CC	CC	CC	CC	CC	CC	CC	CC	CC	CC
SSL2.50ch01_596724	C	T	CC	CC	CC	CC	CC	TT	CC	TT	TT	TT	TT	TT	TT	CC	CC	CC	CC	CC	CC	CC	CC	CC	CC	CC	CC	CC	CC	CC	CC	CC	CC	CC	CC	CC	CC	CC	CC	CC	CC	CC	CC	CC	CC	CC	CC	CC	CC
SSL2.50ch01_596727	A	G	AA	AA	AA	AA	AA	GG	AA	GG	GG	GG	GG	GG	GG	AA	AA	AA	AA	AA	AA	AA	AA	AA	AA	AA	AA	AA	AA	AA	AA	AA	AA	AA	AA	AA	AA	AA	AA	AA	AA	AA	AA	AA	AA	AA	AA	AA	AA
SSL2.50ch01_596736	G	T	GG	GG	GG	GG	GG	TT	GG	TT	TT	TT	TT	TT	TT	GG	GG	GG	GG	GG	GG	GG	GG	GG	GG	GG	GG	GG	GG	GG	GG	GG	GG	GG	GG	GG	GG	GG	GG	GG	GG	GG	GG	GG	GG	GG	GG	GG	GG
SSL2.50ch01_596747	G	T	GG	GG	GG	GG	GG	TT	GG	TT	TT	TT	TT	TT	TT	GG	GG	GG	GG	GG	GG	GG	GG	GG	GG	GG	GG	GG	GG	GG	GG	GG	GG	GG	GG	GG	GG	GG	GG	GG	GG	GG	GG	GG	GG	GG	GG	GG	GG
SSL2.50ch01_597515	G	T	GG	GG	GG	GG	GG	TT	GG	TT	TT	TT	TT	TT	TT	GG	GG	GG	GG	GG	GG	GG	GG	GG	GG	GG	GG	GG	GG	GG	GG	GG	GG	GG	GG	GG	GG	GG	GG	GG	GG	GG	GG	GG	GG	GG	GG	GG	GG
SSL2.50ch01_612723	G	A	AA	AA	AA	NN	AA	GG	AA	GG	GG	GG	GG	GG	GG	GG	AG	GG	AG	AA	GG	GG	GG	AG	GG	GG	AG	AG	GG	GG	AA	GG	AA	AA	AA	GG	GG	AA	AG	AA	GG	AG	GG	GG	AA	GG	AA	GG	AA
SSL2.50ch01_612728	C	T	CC	CC	CC	NN	CC	CC	CC	CC	CC	CC	CC	CC	CC	CC	CC	CC	CC	CC	CC	CC	CC	CC	CC	TT	CC	CC	CT	CC	CC	CC	CC	CC	CC	TT	TT	CC	CC	CC	CT	CT	CC	TT	CC	CC	CC	CC	CC
SSL2.50ch01_612744	G	T	GG	GG	GG	NN	GG	GG	GG	TT	TT	TT	TT	TT	TT	TT	GT	GG	GG	GG	TT	GG	TT	GT	TT	TT	GT	GT	TT	TT	GG	GG	GG	GG	GG	TT	TT	GG	GT	GG	GT	GT	GG	TT	GG	TT	GG	TT	GG
SSL2.50ch01_612750	T	C	TT	TT	TT	NN	TT	TT	TT	CC	CC	CC	CC	CC	CC	CC	CT	TT	TT	TT	CC	TT	CC	CT	CC	CC	CT	CT	CC	CC	TT	TT	TT	TT	TT	CC	CC	TT	CT	TT	CT	CT	TT	CC	TT	CC	TT	CC	TT
SSL2.50ch01_612753	T	C	TT	TT	TT	NN	TT	TT	TT	CC	CC	CC	CC	CC	CC	CC	CT	TT	TT	TT	CC	TT	CC	CT	CC	CC	CT	CT	CC	CC	TT	TT	TT	TT	TT	CC	CC	TT	CT	TT	CT	CT	TT	CC	TT	CC	TT	CC	TT
SSL2.50ch01_612776	C	T	CC	CC	CC	NN	CC	CC	CC	TT	TT	TT	TT	TT	TT	TT	CT	CC	CC	CC	TT	CC	TT	CT	TT	TT	CT	CT	TT	TT	CC	CC	CC	CC	CC	TT	TT	CC	CT	CC	CT	CT	CC	TT	CC	TT	CC	TT	CC
SSL2.50ch01_612779	G	A	GG	GG	GG	NN	GG	GG	GG	AA	AA	AA	AA	AA	AA	AA	AG	GG	GG	GG	AA	GG	AA	AG	AA	AA	AG	AG	AA	AA	GG	GG	GG	GG	GG	AA	AA	GG	AG	GG	AG	AG	GG	AA	GG	AA	GG	AA	GG
SSL2.50ch01_612794	A	G	AA	AA	AA	NN	AA	AA	AA	GG	GG	GG	GG	GG	GG	GG	AG	AA	AA	AA	GG	AA	GG	AG	GG	GG	AG	AG	GG	GG	AA	AA	AA	AA	AA	GG	GG	AA	AG	AA	AG	AG	AA	GG	AA	GG	AA	GG	AA
SSL2.50ch01_612796	C	G	CC	CC	CC	NN	CC	CC	CC	GG	GG	GG	GG	GG	GG	GG	CG	CC	CC	CC	GG	CC	GG	CG	GG	GG	CG	CG	GG	GG	CC	CC	CC	CC	CC	GG	GG	CC	CG	CC	CG	CG	CC	GG	CC	GG	CC	GG	CC
SSL2.50ch01_626590	A	G	AA	AA	AA	AA	AA	AA	AA	AA	AA	GA	AA	GG	AA	GG	GA	AA	AA	AA	AA	AA	GG	GA	AA	AA	AA	AA	AA	AA	AA	AA	AA	AA	AA	AA	AA	AA	AA	AA	AA	AA	AA	AA	AA	AA	AA	AA	AA
SSL2.50ch01_676610	A	G	GG	AA	AA	GA	GA	GG	AA	GG	GG	GG	AA	GG	GG	GG	GA	AA	GA	GG	AA	GG	GG	GA	GG	AA	GA	AA	GA	GG	AA	AA	AA	AA	GG	GG	GG	GG	GG	GG	GG	GG	GG	GG	GG	AA	AA	GG	GG
SSL2.50ch01_677482	C	T	CC	CC	CC	NN	CC	NN	CC	CC	NN	TT	CC	TT	CC	CC	CC	CC	NN	CC	CC	CC	CC	NN	TT	NN	NN	NN	TC	NN	NN	CC	CC	CC	CC	CC	CC	NN	TC	TT	TC	CC	CC	CC	CC	CC	CC	CC	CC
SSL2.50ch01_678650	G	T	TT	GG	GG	GG	GT	GG	GG	GG	GG	GG	GG	GG	GG	GG	GG	GG	GT	TT	GG	TT	GG	GG	GG	GG	GT	GG	GG	GT	GG	GG	GG	GG	TT	TT	TT	TT	GT	TT	TT	TT	TT	TT	TT	GG	GG	TT	TT
SSL2.50ch01_718343	A	G	AA	GG	AA	AA	AA	AA	GG	AA	AA	AA	AA	AA	AA	AA	AA	GG	GG	GG	AA	GG	AA	AA	AA	GG	GG	GG	AA	AA	GG	GG	GG	GG	AA	NN	AA	AA	AA	AA	AA	AA	AA	AA	AA	AA	AA	AA	AA
SSL2.50ch01_720287	T	C	TT	TT	TT	TT	TT	TT	CC	TT	TT	TT	TT	TT	TT	TT	TT	CC	CC	TT	TT	TT	TT	NN	TT	NN	NN	TT	TT	TT	CC	TT	CC	TT	TT	TT	TT	TT	TT	TT	TT	TT	TT	TT	TT	TT	TT	TT	TT
SSL2.50ch01_720341	G	A	GG	GG	AA	AG	GG	GG	GG	GG	GG	GG	GG	GG	GG	GG	AG	GG	GG	GG	AA	GG	GG	GG	GG	GG	GG	GG	AG	AG	GG	GG	GG	GG	AA	GG	GG	GG	GG	GG	GG	GG	GG	GG	GG	GG	AA	GG	GG
SSL2.50ch01_759749	G	A	GG	GG	GG	GG	GG	AA	GG	AA	GG	AA	AA	AA	GG	GG	GG	GG	GG	GG	GG	GG	GG	GG	GG	GG	GG	GG	GG	GG	GG	GG	GG	GG	GG	GG	GG	GG	GG	GG	GG	GG	GG	GG	GG	GG	GG	GG	GG
SSL2.50ch01_759782	A	G	AA	AA	AA	AA	AA	AA	AA	AA	GG	AA	AA	AA	GG	GG	GA	AA	AA	AA	AA	AA	GG	GA	AA	AA	GA	AA	AA	AA	AA	AA	AA	AA	AA	AA	AA	AA	AA	AA	AA	AA	AA	AA	AA	AA	AA	AA	AA
SSL2.50ch01_761551	G	A	NN	GG	GG	GG	GG	GG	GG	GG	NN	GG	GG	GG	AA	AA	AG	GG	GG	NN	GG	GG	AA	AG	GG	GG	AG	GG	GG	GG	GG	GG	GG	GG	GG	NN	GG	GG	GG	NN	GG	GG	GG	GG	GG	GG	GG	GG	GG
SSL2.50ch01_793694	A	G	AA	AA	AA	GA	AA	GG	AA	GG	GG	GG	GG	GG	GG	GG	GA	AA	AA	AA	AA	AA	GG	NN	GG	AA	AA	AA	NN	AA	AA	AA	AA	AA	AA	AA	AA	AA	GA	GG	GG	AA	AA	AA	AA	AA	AA	AA	AA
SSL2.50ch01_798465	T	C	CC	TT	TT	TC	TC	TT	TT	TT	TT	TT	CC	TT	CC	CC	TT	TT	TT	TT	TT	TT	CC	TC	TT	TT	TT	TT	TC	TC	TT	TT	TT	TT	CC	TT	CC	TT	TT	CC	CC	TC	CC	TT	CC	CC	CC	TT	TT
SSL2.50ch01_798475	A	G	GG	AA	AA	GA	GA	AA	AA	AA	AA	AA	GG	AA	GG	GG	AA	AA	AA	AA	AA	AA	GG	GA	AA	AA	AA	AA	GA	GA	AA	AA	AA	AA	GG	AA	GG	AA	AA	GG	GG	GA	GG	AA	GG	GG	GG	AA	AA
SSL2.50ch01_813264	T	C	CC	TT	CC	TC	TC	TT	TT	CC	CC	CC	CC	CC	CC	CC	TC	TT	TT	TT	TT	TT	CC	TC	TT	TT	TC	TC	TC	TC	TT	TT	TT	TT	CC	TT	TT	TT	TC	CC	TC	TT	CC	TT	CC	CC	CC	CC	CC
SSL2.50ch01_813305	A	G	GG	AA	GG	GA	GA	AA	AA	GG	GG	GG	GG	GG	GG	GG	GA	AA	AA	AA	AA	AA	GG	GA	AA	AA	GA	GA	GA	GA	AA	AA	AA	AA	GG	AA	AA	AA	GA	GG	GA	AA	GG	AA	GG	GG	GG	GG	GG
SSL2.50ch01_813317	A	G	GG	AA	GG	GA	GA	AA	AA	GG	GG	GG	GG	GG	GG	GG	GA	AA	AA	AA	AA	AA	GG	GA	AA	AA	GA	GA	GA	GA	AA	AA	AA	AA	GG	AA	AA	AA	GA	GG	GA	AA	GG	AA	GG	GG	GG	GG	GG
SSL2.50ch01_813333	T	G	GG	TT	GG	TG	TG	TT	TT	GG	GG	GG	GG	GG	GG	GG	TG	TT	TT	TT	TT	TT	GG	TG	TT	TT	TG	TG	TG	TG	TT	TT	TT	TT	GG	TT	TT	TT	TG	GG	TG	TT	GG	TT	GG	GG	GG	GG	GG
SSL2.50ch01_813335	A	T	TT	AA	TT	TA	TA	AA	AA	TT	TT	TT	TT	TT	TT	TT	TA	AA	AA	AA	AA	AA	TT	TA	AA	AA	TA	TA	TA	TA	AA	AA	AA	AA	TT	AA	AA	AA	TA	TT	TA	AA	TT	AA	TT	TT	TT	TT	TT
SSL2.50ch01_813351	C	A	AA	CC	AA	AC	AC	CC	CC	CC	NN	CC	CC	CC	CC	CC	CC	CC	CC	CC	CC	CC	CC	CC	CC	CC	AC	CC	NN	AC	NN	CC	CC	CC	AA	CC	CC	CC	AC	CC	AC	CC	AA	CC	AA	AA	AA	CC	AA
SSL2.50ch01_813354	T	C	TT	CC	TT	TT	TT	TT	CC	TT	NN	TT	TT	TT	TT	TT	TT	TT	TT	TT	TT	TT	TT	CT	TT	TT	CT	TT	NN	TT	NN	TT	CC	CC	TT	TT	TT	TT	TT	TT	TT	TT	TT	TT	TT	TT	TT	TT	TT
SSL2.50ch01_813374	T	C	TT	TT	TT	TT	TT	TT	TT	TT	NN	TT	TT	TT	TT	TT	TT	TT	TT	TT	TT	TT	TT	TT	TT	TT	TT	TT	NN	TT	NN	TT	TT	TT	TT	TT	TT	TT	TT	TT	TT	TT	TT	TT	TT	TT	TT	TT	TT
SSL2.50ch01_823883	T	G	TT	TT	TT	TG	TT	TT	TT	TT	NN	TT	TG	TT	TT	TT	TT	TT	TT	TT	TT	NN	TT	NN	TT	TT	TT	TT	TT	TT	TT	TT	TT	TT	TT	TT	TT	TT	TT	GG	TT	TT	TT	TT	TT	TT	TT	TT	TT
SSL2.50ch01_834969	G	A	GG	GG	GG	GG	GG	GG	GG	AA	AA	GA	AA	GG	AA	GG	GG	GG	GG	GG	GG	GG	GG	GG	GG	GG	GG	GG	GG	GG	GG	GG	GG	GG	GG	GG	GG	GG	GG	GG	GG	GG	GG	GG	GG	GG	GG	GG	GG
SSL2.50ch01_835127	C	G	CC	CC	CC	CC	CG	CC	CC	CC	CC	CG	CC	GG	CC	GG	CG	CC	CC	CC	CC	CC	GG	CG	CC	CC	CC	CC	CG	CG	CC	CC	CC	CC	CC	CC	CC	CC	CC	CC	CC	CC	CC	CC	CC	CC	CC	CC	CC
SSL2.50ch01_869734	A	G	AA	AA	AA	AA	AA	AA	AA	GG	GG	GG	GG	GG	GG	AA	AA	AA	AA	AA	AA	AA	AA	AA	AA	AA	AA	AA	AA	AA	AA	AA	AA	AA	AA	AA	AA	AA	AA	AA	AA	AA	AA	AA	AA	AA	AA	AA	AA
SSL2.50ch01_878558	G	A	GG	GG	GG	GG	GG	NN	GG	GG	GG	AG	AA	GG	GG	AA	AG	AG	GG	GG	GG	GG	AA	AA	GG	GG	GG	GG	AA	NN	GG	GG	GG	GG	GG	GG	GG	AG	GG	GG	GG	GG	GG	GG	GG	GG	GG	GG	GG
SSL2.50ch01_880626	C	T	TT	CC	CC	NN	TC	CC	CC	CC	CC	CC	CC	CC	CC	CC	CC	TT	CC	CC	CC	CC	CC	CC	TT	CC	CC	TC	CC	TC	CC	CC	CC	CC	TT	CC	NN	TC	TC	TT	CC	TC	TT	CC	TT	TT	TT	TT	TT
SSL2.50ch01_915466	A	G	GG	AA	GG	GA	GA	AA	GG	AA	AA	AA	AA	AA	AA	AA	AA	GG	GA	GG	GG	AA	AA	AA	AA	AA	GA	GG	GG	GA	AA	AA	AA	AA	AA	GG	GG	GA	GG	AA	GG	GG	GG	GG	GA	GG	GG	AA	GG
SSL2.50ch01_915498	G	A	GG	GG	AA	GG	GG	GG	GG	GG	GG	GG	GG	GG	GG	GG	GG	GG	GG	GG	GG	GG	GG	GG	GG	GG	GG	GA	AA	GG	GG	GG	GG	GG	GG	GG	GG	GG	GA	GG	GG	GA	GG	GG	GG	GG	GG	GG	GG
SSL2.50ch01_915518	A	G	AA	AA	AA	GA	AA	AA	AA	AA	AA	AA	AA	AA	AA	AA	AA	AA	AA	AA	AA	AA	AA	AA	GG	AA	AA	AA	AA	AA	AA	AA	AA	AA	AA	AA	AA	AA	AA	AA	AA	AA	AA	AA	AA	AA	AA	AA	AA
SSL2.50ch01_915623	A	T	AA	TT	AA	AA	AA	NN	NN	AA	NN	AA	AA	AA	AA	AA	AT	AA	AA	AA	AA	TT	AA	AT	AA	AA	NN	NN	AA	NN	TT	TT	TT	AA	AA	NN	AA	AA	AA	AA	AA	AA	AA	AA	AA	AA	AA	AA	AA
SSL2.50ch01_916751	C	T	CC	NN	CC	NN	CC	NN	CC	TT	TT	CC	CC	CC	TT	CC	CC	CC	CC	CC	CC	CC	CC	CC	CC	CC	CC	CC	CC	CC	NN	CC	CC	CC	CC	CC	CC	NN	CC	CC	CC	CC	CC	CC	CC	CC	CC	CC	CC
SSL2.50ch01_916777	T	G	GG	NN	GG	NN	TG	NN	GG	TT	TT	GG	TT	GG	TT	TT	TT	GG	TT	TT	TT	TT	TT	TT	TT	TT	TG	GG	TG	GG	NN	TT	TT	TT	TT	TT	GG	NN	GG	TT	GG	TG	GG	GG	GG	GG	GG	TT	GG
SSL2.50ch01_916851	G	A	AA	GG	AA	AG	AG	GG	AA	GG	GG	AA	GG	AA	GG	AA	AG	AA	GG	GG	GG	GG	AA	AG	GG	AA	AG	AA	AG	AA	GG	GG	GG	GG	GG	GG	AA	AG	AA	GG	AA	AG	AA	AA	AG	AA	AA	GG	AA
SSL2.50ch01_916925	G	A	AA	GG	AA	AG	AG	GG	AA	GG	GG	AA	GG	AA	GG	GG	GG	AA	GG	GG	GG	GG	GG	GG	GG	GG	AG	AA	AG	AA	GG	GG	GG	GG	GG	GG	AA	AG	AA	GG	AA	AG	AA	AA	AG	AA	AA	GG	AA
SSL2.50ch01_934981	T	C	TT	CC	TT	TT	TT	TT	TT	TT	TT	TT	TT	TT	TT	TT	TC	TT	TT	TT	TT	CC	TT	TC	TT	TT	TC	TT	TT	TT	CC	CC	CC	TT	TT	TT	TT	TT	TT	TT	TT	TT	TT	TT	TT	TT	TT	TT	TT
SSL2.50ch01_964834	G	A	GG	GG	GG	GG	GG	GG	GG	NN	GG	GG	GG	GG	GG	GG	GG	GG	GG	GG	GG	GG	GG	GG	GG	GG	NN	GG	GG	NN	NN	GG	GG	GG	GG	NN	GG	NN	GG	GG	GG	GG	GG	NN	GG	GG	GG	GG	GG
SSL2.50ch01_993739	A	C	CC	AA	AA	AA	CC	AA	CC	AA	AA	AA	AA	AA	AA	AA	AA	AA	AA	AA	AA	AA	AA	AA	CC	AA	AA	AC	AC	CC	AA	AA	AA	AA	CC	AA	AA	CC	AC	AA	AA	AC	CC	CC	AC	CC	CC	AA	AA
SSL2.50ch01_999124	C	T	TT	CC	CC	CC	TT	CC	TT	TT	NN	CC	CC	CC	TT	TT	TC	CC	CC	CC	CC	CC	TT	NN	TT	CC	CC	CC	TC	TT	CC	CC	CC	CC	TT	CC	CC	TC	TC	CC	CC	TC	TT	TT	NN	TT	TT	CC	CC
SSL2.50ch01_1064992	G	A	GG	GG	GG	GG	GG	NN	AA	GG	GG	GG	AA	GG	GG	GG	GG	GG	GG	GG	GG	GG	GG	GG	AA	AA	NN	GG	GG	GG	NN	GG	GG	GG	GG	GG	GG	GG	GG	GG	GG	GG	GG	GG	GG	GG	GG	GG	GG
SSL2.50ch01_1065084	T	C	TT	CC	TT	TT	TT	TT	TT	CC	CC	CT	TT	TT	CC	TT	TT	CC	CT	CC	TT	TT	TT	TT	TT	TT	TT	CT	CT	CT	TT	TT	TT	TT	CC	CC	TT	CT	TT	CC	CC	CC	CC	TT	CT	CC	CC	CC	TT
SSL2.50ch01_1074557	G	A	GG	GG	GG	GG	GG	GG	GG	GG	AA	GG	AA	GG	AA	AA	GA	GG	GG	GG	GG	GG	AA	GG	GG	GG	GG	GG	GG	GG	GG	GG	GG	GG	GG	GG	GG	GG	GG	GG	GG	GG	GG	GG	GG	GG	GG	GG	GG
SSL2.50ch01_1074666	G	A	GG	GG	GG	GG	GG	GG	GG	GG	GG	GG	GG	GG	GG	GG	GG	GG	GG	GG	GG	AA	GG	GG	GG	GG	AG	GG	GG	GG	GG	GG	GG	GG	GG	GG	GG	GG	GG	GG	GG	GG	GG	GG	GG	GG	GG	GG	GG
SSL2.50ch01_1077860	A	G	AA	AA	AA	AA	AA	AA	AA	AA	AA	GG	AA	GG	AA	AA	AA	AA	AA	AA	AA	AA	AA	AA	AA	AA	AA	GA	AA	AA	AA	AA	AA	AA	AA	AA	AA	AA	AA	AA	AA	AA	AA	AA	AA	AA	AA	AA	AA
SSL2.50ch01_1084703	G	A	GG	GG	GG	AA	AA	GG	NN	GG	GG	AA	AA	AA	AA	GG	GG	NN	NN	NN	NN	NN	NN	GA	AA	NN	GA	GG	GG	GA	AA	AA	AA	GG	GG	AA	GG	GG	NN	GG	NN	AA	GG	NN	GG	GG	GG	GG	AA
SSL2.50ch01_1084769	C	T	CC	CC	CC	CC	CC	TT	NN	TT	TT	CC	CC	CC	CC	TT	TT	NN	NN	NN	NN	NN	NN	TC	CC	NN	CC	CC	CC	CC	CC	CC	CC	CC	CC	CC	CC	CC	NN	CC	NN	CC	CC	NN	CC	CC	CC	CC	CC
SSL2.50ch01_1085687	A	G	AA	AA	AA	GG	GG	GG	AA	GG	GG	GG	GG	GG	GG	GG	GG	GG	AG	AA	AA	AA	GG	GG	GG	GG	AA	AA	AA	AG	GG	GG	GG	AA	AA	GG	AA	AG	AA	AA	AG	GG	AA	AA	AA	AA	AA	AA	GG
SSL2.50ch01_1091058	A	T	AA	AA	AA	AA	AA	AA	TT	AA	AA	TT	TT	TT	AA	AA	AA	AA	AA	AA	AA	TT	AA	AA	AA	TT	AA	TA	TT	TT	AA	AA	AA	TT	AA	AA	AA	TA	AA	AA	AA	TT	TT	AA	AA	AA	AA	TT	AA
SSL2.50ch01_1096443	G	T	GG	GG	GG	GG	GG	GG	GG	GG	GG	GG	GG	GG	GG	GG	TT	TT	TG	GG	GG	GG	GG	TG	GG	GG	TG	GG	GG	GG	TT	TT	TT	GG	GG	GG	GG	GG	GG	GG	GG	GG	GG	GG	GG	GG	GG	GG	GG
SSL2.50ch01_1186198	C	G	CC	CC	CC	CC	CC	NN	CC	CC	CC	NN	NN	NN	CC	CC	CC	CC	CC	CC	CC	CC	CC	CC	CC	NN	CC	CC	GG	CC	CC	CC	CC	CC	CC	CC	CC	NN	CC	GG	CC	NN	CC	CC	CC	CC	NN	CC	CC
SSL2.50ch01_1238679	A	G	AA	AA	AA	AA	AA	GG	AA	AA	GG	GG	GG	GG	GG	AA	AA	AA	AA	AA	AA	AA	AA	AA	AA	GG	AA	AA	AA	AA	AA	AA	AA	AA	AA	GG	AA	AA	AA	AA	GA	AA	AA	AA	AA	AA	AA	AA	AA
SSL2.50ch01_1247034	C	A	CC	CC	CC	CC	CC	AA	CC	AA	AA	CA	CC	AA	AA	AA	CA	CC	CC	CC	CC	CC	AA	CA	CC	AA	CC	CC	CC	CC	CC	CC	CC	CC	CC	CC	CC	CC	CA	CC	CA	CC	CC	CC	CC	CC	CC	CC	CC
SSL2.50ch01_1248945	A	G	AA	AA	AA	AA	AA	AA	AA	GG	NN	AA	GG	AA	GG	NN	NN	GG	GG	AA	AA	AA	GG	GG	GG	NN	NN	GG	GA	GA	NN	GG	GG	GG	AA	AA	GA	NN	GA	AA	GA	AA	AA	AA	GG	AA	AA	AA	AA
SSL2.50ch01_1248954	C	T	CC	CC	CC	CC	CC	CC	CC	CC	NN	CC	TT	CC	CC	NN	NN	TT	TT	CC	CC	CC	CC	TT	TT	NN	NN	TT	TC	TC	NN	TT	TT	TT	CC	CC	TC	NN	CC	CC	CC	CC	CC	CC	TT	CC	CC	CC	CC
SSL2.50ch01_1248959	C	T	CC	CC	CC	CC	CC	CC	CC	TT	NN	CC	CC	CC	TT	NN	NN	CC	CC	CC	CC	CC	TT	CC	CC	NN	NN	CC	CC	CC	NN	CC	CC	CC	CC	CC	CC	CC	TC	CC	TC	CC	CC	CC	CC	CC	CC	CC	CC
SSL2.50ch01_1248962	A	C	AA	AA	AA	AA	AA	AA	AA	CC	NN	AA	CC	AA	CC	NN	NN	CC	CC	AA	AA	AA	CC	CC	CC	NN	NN	CC	CA	CA	NN	CC	CC	CC	AA	AA	CA	NN	CA	AA	CA	AA	AA	AA	CC	AA	AA	AA	AA
SSL2.50ch01_1248992	G	T	GG	GG	GG	GG	GG	GG	GG	TT	NN	GG	GG	GG	TT	NN	NN	GG	GG	GG	GG	GG	TT	GG	GG	NN	NN	GG	GG	GG	NN	GG	GG	GG	GG	GG	GG	GG	TG	GG	TG	GG	GG	GG	GG	GG	GG	GG	GG
SSL2.50ch01_1249054	A	C	AA	AA	AA	AA	AA	AA	AA	CC	CC	AA	AA	AA	CC	CC	AC	AA	AA	AA	AA	AA	CC	AC	AA	AA	AA	AA	AA	AA	AA	AA	AA	AA	AA	AA	AA	AA	AC	AA	AC	AA	AA	AA	AA	AA	AA	AA	AA
SSL2.50ch01_1249058	T	C	TT	TT	TT	TT	TT	TT	TT	TT	TT	TT	CC	TT	TT	TT	CT	CC	CT	TT	TT	TT	TT	CT	CC	TT	CT	CT	CT	CT	CC	CC	CC	CC	TT	TT	CT	CT	TT	TT	TT	TT	TT	TT	CC	TT	TT	TT	TT
SSL2.50ch01_1249060	G	C	GG	GG	GG	GG	GG	GG	GG	CC	CC	GG	GG	GG	CC	CC	CG	GG	GG	GG	GG	GG	CC	CG	GG	GG	GG	GG	GG	GG	GG	GG	GG	GG	GG	GG	GG	GG	CG	GG	CG	GG	GG	GG	GG	GG	GG	GG	GG
SSL2.50ch01_1249069	A	T	AA	AA	AA	AA	AA	AA	AA	TT	TT	AA	AA	AA	TT	TT	AT	AA	AA	AA	AA	AA	TT	AT	AA	AA	AA	AA	AA	AA	AA	AA	AA	AA	AA	AA	AA	AA	AT	AA	AT	AA	AA	AA	AA	AA	AA	AA	AA
SSL2.50ch01_1249101	A	G	AA	AA	AA	AA	AA	AA	AA	GG	GG	AA	AA	AA	GG	GG	AG	AA	AA	AA	AA	AA	GG	AG	AA	AA	AA	AA	AA	AA	AA	AA	AA	AA	AA	AA	AA	AA	AG	AA	AG	AA	AA	AA	AA	AA	AA	AA	AA
SSL2.50ch01_1277302	T	C	CC	TT	TT	TT	TT	CC	TT	CC	CC	TC	CC	CC	CC	CC	TC	TT	TT	NN	NN	NN	CC	TC	CC	NN	NN	TT	TT	TT	TT	TT	NN	TT	TT	NN	TC	NN	TT	TT	TT	TT	TT	TT	TT	TT	CC	TT	TT
SSL2.50ch01_1277340	T	G	TT	TT	GG	GG	GG	TT	TT	TT	TT	TT	TT	TT	TT	TT	TT	TT	TT	NN	NN	NN	TT	TT	TT	NN	NN	TT	GG	TT	TT	TT	NN	TT	GG	NN	TG	NN	TG	GG	GG	GG	TT	GG	GG	TT	TT	GG	GG
SSL2.50ch01_1295970	A	T	AA	TT	AA	NN	AA	NN	TT	TA	NN	TT	TT	TT	TT	NN	TA	TT	AA	AA	AA	TT	TT	AA	TT	AA	TA	NN	NN	TT	NN	TT	TT	AA	TT	AA	AA	AA	AA	AA	AA	AA	TT	AA	AA	TT	AA	TT	NN
SSL2.50ch01_1302160	T	C	TT	TT	TT	TT	TT	TT	TT	CC	TT	TC	CC	CC	CC	TT	TT	TT	TT	TT	TT	TT	TT	TT	TT	TT	TT	TT	TT	TT	TT	TT	TT	TT	TT	TT	TT	TT	TT	TT	TT	TT	TT	TT	TT	TT	TT	TT	TT
SSL2.50ch01_1302245	G	A	GG	GG	GG	GG	GG	GG	GG	AA	GG	AG	AA	AA	AA	GG	GG	GG	GG	GG	GG	GG	GG	GG	GG	GG	GG	GG	GG	GG	NN	GG	GG	GG	GG	GG	GG	NN	GG	GG	GG	GG	GG	GG	GG	GG	GG	GG	GG
SSL2.50ch01_1346394	C	T	CC	TT	CC	CC	CC	CC	TT	CC	CC	CC	CC	CC	CC	TT	TC	TT	NN	CC	CC	TT	TT	TC	CC	CC	TC	CC	CC	CC	CC	CC	CC	CC	CC	CC	CC	CC	CC	CC	CC	CC	CC	CC	CC	CC	CC	CC	CC
SSL2.50ch01_1346534	T	G	TT	TT	GG	TT	TT	TT	TT	TT	TT	TT	TT	TT	TT	NN	TT	TT	GT	TT	TT	GG	TT	TT	TT	TT	GT	TT	TT	GG	TT	TT	TT	TT	TT	TT	TT	TT	TT	TT	TT	TT	TT	TT	TT	TT	TT	TT	GG
SSL2.50ch01_1366995	G	A	GG	GG	GG	GG	GG	GG	GG	GG	GG	GG	GG	GG	GG	GG	GG	GG	GG	GG	GG	GG	GG	GG	GG	GG	GG	GG	GG	GG	GG	GG	GG	GG	GG	GG	GG	GG	GG	GG	GG	GG	GG	GG	GG	GG	GG	GG	GG
SSL2.50ch01_1367023	G	A	GG	GG	GG	GG	GG	GG	GG	GG	GG	GG	GG	GG	GG	GG	AG	AA	AG	GG	GG	GG	GG	AG	GG	GG	GG	GG	GG	GG	AA	GG	AA	GG	GG	GG	GG	GG	GG	GG	GG	GG	GG	AA	GG	GG	GG	GG	GG
SSL2.50ch01_1377081	A	G	AA	AA	NN	AA	AA	AA	AA	AA	NN	AA	AA	AA	AA	AA	AA	GG	GA	AA	AA	AA	AA	GA	AA	NN	GA	AA	AA	AA	GG	AA	GG	AA	AA	AA	AA	AA	AA	AA	AA	AA	AA	AA	AA	AA	AA	AA	AA
SSL2.50ch01_1401461	C	T	CC	CC	CC	CC	CC	CC	CC	CC	CC	CC	CC	CC	CC	CC	CC	CC	TC	TT	CC	CC	CC	CC	CC	CC	CC	CC	TC	CC	CC	CC	CC	CC	CC	CC	TT	CC	TC	CC	CC	CC	CC	CC	TT	CC	CC	CC	CC
SSL2.50ch01_1401546	A	T	AA	AA	AA	TT	AA	AA	AA	TT	TT	AA	AA	AA	TT	TT	AT	AA	AA	AA	AA	AA	TT	AT	AA	TT	AA	AA	AA	AA	AA	AA	AA	AA	AA	AA	AA	AA	AA	AA	AA	TT	AA	AA	AA	AA	AA	AA	AA
SSL2.50ch01_1418591	G	A	GG	GG	NN	GG	GG	GG	GG	AA	AA	GG	NN	GG	AA	AA	AG	GG	GG	GG	GG	GG	AA	AG	GG	GG	GG	GG	GG	GG	GG	GG	GG	GG	GG	GG	GG	GG	GG	GG	GG	GG	GG	GG	GG	GG	NN	GG	GG
SSL2.50ch01_1445863	A	G	AA	GG	AA	AA	AA	AA	AA	AA	AA	AA	AA	AA	AA	GG	GA	AA	AA	AA	GG	AA	GG	GA	AA	AA	AA	AA	AA	AA	AA	AA	AA	AA	AA	AA	AA	AA	GA	AA	AA	AA	AA	AA	AA	AA	AA	AA	AA
SSL2.50ch01_1447487	C	T	CC	CT	CC	CC	CC	NN	CC	CC	CC	CC	CC	CC	CC	CT	CC	NN	CC	CC	TT	CC	CC	CC	CC	NN	CC	CC	CC	NN	NN	CC	CC	CT	CT	CC	CC	CC	CC	CC	CC	CC	CT	CC	CC	CT	CT	CT	CT
SSL2.50ch01_1447488	A	T	AA	AT	AA	AA	AA	NN	AA	AA	AA	AA	AA	AA	AA	AT	AA	NN	AA	AA	TT	AA	AA	AA	AA	NN	AA	AA	AA	NN	NN	AA	AA	AT	AT	AA	AA	AA	AA	AA	AA	AA	AT	AA	AA	AT	AT	AT	AT
SSL2.50ch01_1447489	A	C	AA	AC	AA	AA	AA	NN	AA	AA	AA	AA	AA	AA	AA	AC	AA	NN	AA	AA	CC	AA	AA	AA	AA	NN	AA	AA	AA	NN	NN	AA	AA	AC	AC	AA	AA	AA	AA	AA	AA	AA	AC	AA	AA	AC	AC	AC	AC
SSL2.50ch01_1447497	T	G	TT	GT	TT	TT	TT	NN	TT	TT	TT	TT	TT	TT	TT	GT	TT	NN	TT	TT	GG	TT	TT	TT	TT	NN	TT	TT	TT	NN	NN	TT	TT	GT	GT	TT	TT	TT	TT	TT	TT	TT	GT	TT	TT	GT	GT	GT	GT
SSL2.50ch01_1447499	G	A	GG	AG	GG	GG	GG	NN	GG	GG	GG	GG	GG	GG	GG	AG	GG	NN	GG	GG	AA	GG	GG	GG	GG	NN	GG	GG	GG	NN	NN	GG	GG	AG	AG	GG	GG	GG	GG	GG	GG	GG	AG	GG	GG	AG	AG	AG	AG
SSL2.50ch01_1447504	G	T	TT	GG	TT	GG	GG	NN	TT	GG	GG	GG	GG	GG	GG	GG	GG	NN	GT	TT	GG	GG	GG	GG	GG	NN	GG	GT	NN	NN	NN	GG	GG	GG	GT	TT	GG	GG	GG	TT	GG	GG	GT	TT	TT	GT	GT	GT	GT
SSL2.50ch01_1447505	C	T	CC	CT	CC	CC	CC	NN	CC	CC	CC	CC	CC	CC	CC	CT	CC	NN	CC	CC	TT	CC	CC	CC	CC	NN	CC	CC	CC	NN	NN	CC	CC	CT	CT	CC	CC	CC	CC	CC	CC	CC	CT	CC	CC	CT	CT	CT	CT
SSL2.50ch01_1447506	T	A	TT	AT	TT	TT	TT	NN	TT	TT	TT	TT	TT	TT	TT	AT	TT	NN	TT	TT	AA	TT	TT	TT	TT	NN	TT	TT	TT	NN	NN	TT	TT	AT	AT	TT	TT	TT	TT	TT	TT	TT	AT	TT	TT	AT	AT	AT	AT
SSL2.50ch01_1447510	T	A	TT	AT	TT	TT	TT	NN	TT	TT	TT	TT	TT	TT	TT	AT	TT	NN	TT	TT	AA	TT	TT	TT	TT	NN	TT	TT	TT	NN	NN	TT	TT	AT	AT	TT	TT	TT	TT	TT	TT	TT	AT	TT	TT	AT	AT	AT	AT
SSL2.50ch01_1447521	T	A	TT	AT	TT	TT	TT	NN	TT	TT	TT	TT	TT	TT	TT	AT	TT	NN	TT	TT	AA	TT	TT	TT	TT	NN	TT	TT	TT	NN	NN	TT	TT	AT	AT	TT	TT	TT	TT	TT	TT	TT	AT	TT	TT	AT	AT	AT	AT
SSL2.50ch01_1447523	C	G	CC	CG	CC	CC	CC	NN	CC	CC	CC	CC	CC	CC	CC	CG	CC	NN	CC	CC	GG	CC	CC	CC	CC	NN	CC	CC	CC	NN	NN	CC	CC	CG	CG	CC	CC	CC	CC	CC	CC	CC	CG	CC	CC	CG	CG	CG	CG
SSL2.50ch01_1447530	G	T	GG	GT	GG	GG	GG	NN	GG	GG	GG	GG	GG	GG	GG	GT	GG	NN	GG	GG	TT	GG	GG	GG	GG	NN	GG	GG	GG	NN	NN	GG	GG	GT	GT	GG	GG	GG	GG	GG	GG	GG	GT	GG	GG	GT	GT	GT	GT
SSL2.50ch01_1447554	A	G	AA	AG	AA	AA	AA	NN	AA	AA	AA	AA	AA	AA	AA	AG	AA	NN	AA	AA	GG	AA	AA	AA	AA	NN	AA	AA	AA	NN	NN	AA	AA	AG	AG	AA	AA	AA	AA	AA	AA	AA	AG	AA	AA	AG	AG	AG	AG
SSL2.50ch01_1469529	C	G	CC	CC	CC	CC	CC	CC	CC	GG	GG	GG	CC	GG	GG	CC	GC	CC	CC	CC	CC	CC	CC	CC	CC	CC	CC	CC	CC	CC	CC	CC	CC	CC	CC	CC	CC	CC	CC	GG	CC	CC	CC	CC	CC	CC	CC	CC	CC
SSL2.50ch01_1470936	C	T	CC	CC	CC	CC	CC	CC	CC	TT	NN	TT	CC	TT	TT	CC	TC	CC	CC	CC	CC	CC	CC	NN	NN	CC	CC	CC	CC	CC	NN	CC	CC	CC	CC	NN	CC	CC	CC	TT	CC	CC	CC	CC	CC	CC	CC	CC	CC
SSL2.50ch01_1507971	T	A	TT	TT	TT	TT	AA	AA	TT	TT	TT	TA	AA	TT	TT	AA	TT	TT	TT	TT	TT	TT	AA	TA	TT	AA	TT	TT	TT	TA	TT	TT	TT	TT	TT	TT	TA	TA	TA	TT	TT	TT	TT	TT	TT	TT	AA	TT	TT
SSL2.50ch01_1508029	G	A	AA	GG	GG	GG	GG	GG	GG	GG	GG	GG	GG	GG	GG	GG	GG	GG	NN	AA	GG	GG	GG	GG	GG	GG	AG	AG	GG	GG	GG	GG	GG	GG	GG	GG	GG	GG	GG	GG	GG	GG	GG	AG	AA	AA	GG	GG	GG
SSL2.50ch01_1511243	A	C	AA	AA	AA	AA	AA	AA	AA	CC	NN	CA	CC	CC	CC	AA	CA	AA	AA	AA	AA	AA	AA	AA	AA	AA	AA	AA	AA	AA	AA	AA	AA	AA	NN	AA	AA	AA	AA	AA	AA	AA	AA	AA	AA	AA	CC	AA	AA
SSL2.50ch01_1511248	A	G	AA	AA	AA	AA	AA	AA	AA	GG	NN	GA	GG	GG	GG	AA	GA	AA	AA	AA	AA	AA	AA	AA	AA	AA	AA	AA	AA	AA	AA	AA	AA	AA	NN	AA	AA	AA	AA	AA	AA	AA	AA	AA	AA	AA	GG	AA	AA
SSL2.50ch01_1511380	A	G	AA	AA	AA	AA	AA	GG	AA	GG	GG	AG	AA	GG	AA	GG	AA	AA	AA	AA	AA	AA	GG	AG	AA	AA	AA	AA	AA	AA	AA	AA	AA	AA	AA	NN	AA	NN	AA	AA	AA	AA	AA	AA	AA	AA	GG	AA	AA
SSL2.50ch01_1534280	C	A	CC	CC	CC	NN	CC	NN	CC	CC	NN	CC	AA	CC	CC	NN	CC	CC	CC	CC	CC	CC	CC	CC	CC	NN	CC	CC	NN	CC	CC	CC	CC	NN	NN	NN	NN	CC	CC	CC	CC	CC	CC	CC	CC	CC	CC	CC	CC
SSL2.50ch01_1539164	A	G	AA	AA	AA	AA	AA	AA	AA	AA	AA	AA	AA	AA	AA	AA	GA	AA	AA	AA	GG	AA	AA	GG	AA	AA	GA	GA	AA	AA	AA	AA	AA	AA	GG	AA	AA	GA	AA	AA	GG	AA	AA	GA	AA	AA	AA	GG	AA
SSL2.50ch01_1664880	A	T	AA	AA	AA	AA	AA	AA	AA	AA	AA	AA	AA	AA	AA	AA	AA	AA	TA	TT	AA	AA	AA	AA	AA	AA	AA	TA	AA	AA	AA	AA	AA	AA	AA	AA	TA	TA	TA	AA	AA	AA	AA	AA	AA	TT	AA	AA	TT
SSL2.50ch01_1665011	C	T	CC	CC	CC	CC	CC	TT	CC	TT	TT	CT	CC	TT	TT	TT	NN	CC	CC	CC	CC	CC	TT	CT	CC	CC	CC	CC	CC	CC	CC	CC	CC	CC	CC	CC	CC	CC	CC	CC	CC	CC	CC	CC	CC	CC	CC	CC	CC
SSL2.50ch01_1689306	T	C	TT	TT	TT	TT	TT	TT	TT	TT	TT	TT	TT	TT	TT	TT	TT	TT	TT	TT	TT	TT	TT	TT	CC	TT	TT	TT	TT	TT	TT	TT	TT	TT	TT	TT	TC	TT	TT	CC	TC	TT	TT	TT	TT	TT	CC	TT	TT
SSL2.50ch01_1702933	G	A	GG	GG	GG	GG	GG	AA	GG	AA	AA	AA	GG	AA	AA	AA	AG	GG	GG	GG	GG	GG	AA	AG	GG	GG	GG	GG	GG	GG	GG	GG	GG	GG	GG	GG	GG	GG	GG	GG	GG	GG	GG	GG	GG	GG	GG	GG	AA
SSL2.50ch01_1712412	G	A	AA	GG	GG	GG	GG	AA	GG	AA	AA	AA	GG	AA	AA	AA	GA	GG	GG	GG	GG	GG	AA	NN	AA	GG	GG	GA	GG	GG	GG	GG	GG	GG	GG	GG	GA	GG	GG	GG	GG	GG	GG	GG	AA	AA	GG	GG	GG
SSL2.50ch01_1712440	T	G	TT	TT	TT	TT	TT	TT	TT	TT	TT	TT	TT	TT	TT	TT	TT	TT	TG	TT	TT	TT	TT	TT	TT	TT	TT	TT	TT	TT	TT	GG	TT	TT	TT	TT	TT	TT	TT	TT	TT	TT	TT	TT	TT	TT	TT	TT	TT
SSL2.50ch01_1712441	G	T	GG	GG	GG	GG	GG	GG	GG	GG	GG	GG	GG	GG	GG	GG	GG	GG	TG	GG	GG	GG	GG	GG	GG	GG	GG	GG	GG	GG	GG	TT	GG	GG	GG	GG	GG	GG	GG	GG	GG	GG	GG	GG	GG	GG	GG	GG	GG
SSL2.50ch01_1728603	G	A	GG	GG	GG	GG	AA	GG	GG	GG	GG	GG	GG	GG	AA	GG	GG	GG	GG	GG	AA	GG	GG	NN	GG	AA	GG	GG	GG	AG	NN	GG	GG	GG	GG	GG	GG	GG	GG	AA	GG	GG	GG	GG	GG	GG	GG	GG	GG
SSL2.50ch01_1732259	A	G	AA	GG	AA	AA	GG	GG	AA	GG	GG	GG	AA	GG	AA	GG	GG	AA	GA	AA	AA	AA	GG	GG	AA	AA	AA	AA	AA	NN	GG	AA	GG	AA	AA	AA	AA	AA	AA	AA	AA	AA	AA	GA	AA	AA	AA	AA	AA
SSL2.50ch01_1732308	G	A	GG	AA	GG	GG	AA	AA	GG	AA	AA	AA	GG	AA	GG	AA	AA	GG	AG	GG	GG	GG	AA	AA	GG	GG	GG	GG	GG	AG	AA	GG	AA	GG	GG	GG	GG	GG	GG	GG	GG	GG	GG	AG	GG	GG	GG	GG	GG
SSL2.50ch01_1904322	T	A	AA	TT	TT	AA	AA	AA	TT	AA	AA	TT	AA	TT	AA	AA	AA	AA	AA	AA	AA	AA	AA	AA	TT	TT	TT	TT	TT	TT	AA	AA	AA	TT	TT	AA	TT	TT	TT	AA	TT	TT	TT	AT	AA	TT	AA	TT	TT
SSL2.50ch01_1906245	C	T	CC	CC	CC	TT	CC	CC	CC	CC	CC	CC	CC	CC	CC	CC	CC	CC	TC	TT	CC	TT	CC	NN	CC	CC	TC	CC	CC	CC	CC	TT	CC	CC	CC	TT	CC	NN	CC	TT	CC	CC	CC	CC	TT	CC	TT	CC	CC
SSL2.50ch01_1907354	A	G	GG	AA	AA	AA	GG	AA	AA	AA	AA	AA	AA	AA	AA	AA	AG	GG	AG	AA	GG	AA	AA	AG	AA	AA	AA	AA	AA	AA	GG	AA	GG	AA	AA	AA	AA	AA	AA	AA	AA	AA	AA	AA	AA	AA	AA	AA	AA
SSL2.50ch01_1941200	A	G	AA	AA	AA	AA	GG	GA	AA	AA	GG	AA	AA	AA	AA	AA	AA	AA	AA	AA	AA	AA	AA	AA	AA	AA	AA	AA	AA	GA	AA	AA	AA	AA	AA	AA	AA	GA	AA	AA	AA	GG	AA	AA	AA	AA	AA	AA	AA
SSL2.50ch01_1941216	A	C	AA	AA	AA	AA	AA	AA	CC	AA	AA	CA	AA	AA	AA	CC	CC	CC	CA	AA	AA	CC	CC	CC	AA	AA	AA	AA	AA	AA	CC	CC	CC	AA	AA	AA	AA	AA	AA	AA	AA	AA	AA	AA	AA	CC	AA	AA	CC
SSL2.50ch01_1946753	A	G	AA	AA	AA	AA	AA	AA	GG	AA	NN	AG	AA	AA	AA	GG	GG	GG	AG	AA	AA	GG	GG	GG	AA	AA	AA	AA	AA	NN	GG	GG	GG	AA	AA	AA	AA	AA	AA	AA	AA	AA	AA	AA	AA	GG	AA	AA	GG
SSL2.50ch01_1946773	G	T	GG	GG	GG	GG	TT	GT	GG	GG	NN	GG	GG	GG	GG	GG	GG	GG	GG	GG	GG	GG	GG	GG	GG	GG	GG	GG	GG	GT	GG	GG	GG	GG	GG	GG	GG	GT	GG	GG	GG	TT	GG	GG	GG	GG	GG	GG	GG
SSL2.50ch01_1949923	C	T	CC	TT	CC	TT	NN	TC	CC	CC	CC	CC	CC	CC	NN	CC	CC	CC	TC	TT	CC	CC	CC	CC	CC	CC	CC	CC	TT	CC	CC	CC	CC	CC	CC	CC	CC	NN	TC	CC	CC	TT	CC	CC	CC	CC	CC	CC	CC
SSL2.50ch01_1949926	A	G	AA	AA	AA	AA	NN	AA	AA	AA	AA	GA	AA	GG	NN	AA	AA	AA	AA	AA	AA	AA	AA	AA	GG	AA	AA	AA	AA	AA	AA	GG	AA	AA	AA	AA	AA	AA	AA	AA	GA	AA	AA	AA	AA	AA	AA	AA	AA
SSL2.50ch01_1955432	A	C	AA	AA	AA	AA	AA	AA	AA	CC	CC	CA	AA	CC	CC	CC	CA	AA	AA	AA	AA	AA	CC	CA	AA	CC	AA	AA	AA	AA	AA	AA	AA	AA	AA	AA	AA	AA	AA	AA	AA	AA	AA	AA	AA	AA	AA	AA	AA
SSL2.50ch01_1955523	A	G	AA	AA	AA	AA	AA	AA	AA	AA	AA	AA	AA	AA	AA	AA	AA	GG	AA	AA	AA	AA	AA	AA	AA	AA	AA	AA	AA	AA	GG	GG	GG	GG	AA	AA	AA	AA	AA	AA	AA	AA	AA	AA	AA	AA	AA	AA	NN
SSL2.50ch01_1965653	T	A	TT	TT	TT	TT	TT	AT	TT	AA	AA	TT	AA	TT	AA	AA	AT	TT	TT	TT	TT	TT	AA	AT	TT	TT	TT	TT	TT	TT	TT	TT	TT	TT	TT	TT	TT	TT	TT	TT	TT	TT	TT	TT	TT	TT	TT	TT	TT
SSL2.50ch01_1999487	C	G	GG	CC	GG	GG	CC	GC	CC	CC	CC	GC	GG	CC	CC	CC	GC	CC	GC	GG	CC	CC	CC	CC	CC	GG	CC	GC	CC	GC	CC	CC	CC	CC	GG	CC	GC	CC	CC	GG	CC	GG	GG	CC	CC	GG	GG	GG	GG
SSL2.50ch01_1999549	C	T	CC	TT	CC	CC	TT	CC	TT	CC	CC	CC	CC	CC	CC	CC	CC	TT	TC	CC	TT	TT	CC	NN	CC	CC	TT	TC	TT	TC	TT	TT	TT	TT	CC	TT	TC	TT	TT	CC	TC	CC	CC	TC	TT	CC	CC	CC	CC
SSL2.50ch01_1999648	T	C	TT	CC	TT	TT	CC	TT	CC	TT	TT	TT	TT	TT	TT	TT	TT	CC	CT	TT	CC	CC	TT	CC	TT	TT	CC	CT	CC	CT	CC	CC	CC	CC	TT	CC	CT	CC	CC	TT	CT	TT	TT	CT	CC	TT	TT	TT	TT
SSL2.50ch01_2016532	T	C	CC	TT	CC	CC	TT	NN	TT	TT	NN	TT	CC	TT	TT	NN	CT	TT	CT	CC	TT	TT	TT	NN	TT	NN	NN	CC	TT	NN	TT	TT	TT	TT	CC	NN	CT	CT	CC	CC	TT	CC	TT	TT	TT	CC	CC	CC	CC
SSL2.50ch01_2018128	C	A	CC	CC	CC	CC	CC	NN	CC	CC	NN	CC	CC	CC	CC	CC	CC	CC	CC	CC	CC	CC	CC	CC	CC	CC	CC	CC	CC	CC	CC	CC	CC	CC	CC	CC	CC	CC	CC	CC	CC	CC	CC	CC	CC	CC	CC	CC	CC
SSL2.50ch01_2019024	G	A	GG	GG	GG	GG	GG	NN	GG	GG	GG	GG	GG	GG	GG	GG	GG	GG	GG	GG	GG	GG	GG	GG	GG	GG	GG	GG	GG	GG	GG	GG	GG	GG	GG	GG	GG	GG	GG	GG	GG	GG	GG	GG	GG	GG	GG	GG	GG
SSL2.50ch01_2019051	G	A	GG	GG	GG	GG	GG	GG	GG	GG	GG	GG	GG	GG	GG	GG	GG	AA	AG	GG	GG	GG	GG	AA	AA	GG	AG	GG	AA	GG	AA	AA	AA	GG	GG	GG	AG	GG	GG	GG	AG	GG	GG	AG	GG	GG	GG	GG	GG
SSL2.50ch01_2023990	G	C	GG	GG	GG	GG	GG	GG	GG	GG	GG	GG	GG	GG	GG	GG	GG	CC	GG	GG	GG	GG	GG	CC	GG	GG	GG	GG	GG	GG	CC	GG	CC	GG	GG	GG	GG	GG	GG	GG	GG	GG	GG	GG	GG	GG	GG	GG	GG
SSL2.50ch01_2023993	C	T	CC	CC	CC	CC	TT	TT	CC	TT	TT	TT	CC	CC	TT	TT	CT	CC	CT	CC	CC	CC	TT	CC	CC	TT	CC	CC	TT	TT	CC	CC	CC	CC	CC	CC	CC	CC	CC	CC	CT	CC	CC	CC	CC	CC	TT	CC	CC
SSL2.50ch01_2049497	G	T	GG	GG	GG	GG	GG	TG	GG	TT	NN	TG	GG	GG	TT	TT	TG	GG	GG	GG	GG	GG	TT	GG	TT	GG	GG	GG	GG	GG	GG	GG	GG	GG	GG	GG	GG	GG	GG	GG	GG	GG	GG	GG	GG	GG	NN	GG	GG
SSL2.50ch01_2049566	A	G	AA	AA	AA	AA	AA	AA	GG	AA	NN	AA	AA	AA	AA	AA	AA	AA	AA	AA	AA	AA	AA	AA	AA	AA	AA	AA	AA	AA	AA	AA	AA	AA	GG	AA	AA	AA	AA	AA	AA	AA	AA	AA	AA	GG	AA	AA	AA
SSL2.50ch01_2049652	T	C	TT	TT	TT	TT	TT	NN	TT	CC	CC	CT	TT	TT	CC	CC	NN	TT	TT	TT	TT	TT	CC	TT	TT	TT	TT	TT	TT	TT	TT	TT	TT	TT	TT	TT	TT	TT	TT	TT	TT	TT	TT	TT	TT	TT	TT	TT	TT
SSL2.50ch01_2051383	C	A	CC	CC	CC	CC	CC	CC	CC	CC	CC	CC	CC	CC	CC	CC	CC	AA	CC	CC	CC	CC	CC	CC	CC	CC	CC	CC	CC	CC	CC	AA	CC	CC	CC	CC	CC	CC	CC	CC	CC	CC	CC	CC	CC	CC	CC	CC	AA
SSL2.50ch01_2089106	A	G	AA	AA	AA	AA	AA	AA	AA	AA	AA	AA	AA	AA	AA	AA	GA	AA	GA	GG	AA	NN	AA	GA	AA	AA	AA	GA	GG	AA	AA	AA	AA	AA	AA	AA	GA	GA	AA	AA	AA	GG	GG	AA	GG	AA	AA	GG	GG
SSL2.50ch01_2089211	G	C	GG	GG	GG	GG	GG	GG	GG	CC	NN	CC	GG	CC	CC	NN	GG	GG	GG	GG	GG	NN	NN	GG	GG	GG	GG	GG	GG	GG	GG	GG	GG	GG	GG	GG	GG	GG	GG	GG	GG	GG	GG	GG	GG	GG	GG	GG	GG
SSL2.50ch01_2089228	C	T	CC	CC	CC	TT	CC	CT	CC	CC	NN	CC	CC	CC	CC	NN	CC	CC	CC	CC	CC	NN	NN	CC	CC	CC	CC	CC	CC	CC	CC	CC	CC	CC	CC	CC	CC	CC	CC	CC	CC	CC	CC	CT	CC	CC	CC	CC	CC
SSL2.50ch01_2106683	C	T	CC	CC	CC	CC	CC	CC	CC	CC	CC	CC	CC	CC	CC	CC	CC	CC	CC	CC	CC	CC	CC	CC	CC	TT	CT	CC	CC	CC	CC	CC	CC	CC	CC	CC	CC	CC	CC	CC	CC	CC	CC	CC	CC	CC	CC	CT	CC
SSL2.50ch01_2110172	C	T	CC	CC	CC	CC	CC	CT	CC	TT	TT	CT	CC	CC	CC	TT	CT	CC	CC	CC	CC	CC	TT	CC	CC	CC	CC	CC	CC	CC	CC	CC	CC	CC	CC	CC	CC	CC	CC	CC	CC	CC	CC	CC	CC	CC	CC	CC	CC
SSL2.50ch01_2118175	C	T	CC	CC	CC	CC	TT	CC	CC	CC	CC	CC	CC	CC	CC	CC	CC	CC	CC	CC	CC	CC	CC	CC	CC	CC	CC	CC	CC	CT	TT	CC	TT	CC	CC	CC	CC	CC	CC	CC	CC	CC	CC	CC	CC	CC	CC	CC	CC
SSL2.50ch01_2126074	A	T	AA	NN	AA	AA	AA	NN	AA	NN	NN	AA	AA	TT	AA	AA	AA	AA	NN	NN	AA	NN	NN	AA	AA	AA	TA	AA	AA	AA	AA	AA	AA	AA	AA	AA	AA	AA	AA	AA	AA	AA	AA	NN	AA	NN	AA	TT	AA
SSL2.50ch01_2134625	G	A	GG	GG	NN	NN	GG	GG	NN	GG	GG	AG	GG	GG	AA	AA	AG	GG	GG	NN	GG	GG	AA	AG	NN	GG	GG	GG	GG	GG	GG	GG	GG	GG	NN	GG	GG	GG	NN	GG	GG	GG	GG	GG	NN	NN	GG	NN	GG
SSL2.50ch01_2149805	T	C	TC	TC	TC	TC	TT	TT	TC	TT	TT	TT	TT	TT	TT	TT	TC	TC	TC	TC	TC	TC	NN	TC	TT	TT	TC	TC	TC	TC	TC	TC	TC	TC	TC	TC	TC	TC	TC	TC	TC	TC	TC	TC	CC	TC	TC	TC	TC
SSL2.50ch01_2149808	A	C	CA	CA	CA	CA	AA	AA	CA	AA	AA	AA	AA	AA	AA	AA	CA	CA	CA	CA	CA	CA	NN	CA	AA	AA	CA	CA	CA	CA	CA	CA	CA	CA	CA	CA	CA	CA	CA	CA	CA	CA	CA	CA	CC	CA	CA	CA	CA
SSL2.50ch01_2149809	T	A	TA	TA	TA	TA	TT	TT	TA	TT	TT	TT	TT	TT	TT	TT	TA	TA	TA	TA	TA	TA	NN	TA	TT	TT	TA	TA	TA	TA	TA	TA	TA	TA	TA	TA	TA	TA	TA	TA	TA	TA	TA	TA	AA	TA	TA	TA	TA
SSL2.50ch01_2149816	C	T	TC	TC	TC	TC	CC	CC	TC	CC	CC	CC	CC	CC	CC	CC	TC	TC	TC	TC	TC	TC	NN	TC	CC	CC	TC	TC	TC	TC	TC	TC	TC	TC	TC	TC	TC	TC	TC	TC	TC	TC	TC	TC	TT	TC	TC	TC	TC
SSL2.50ch01_2149826	C	T	CC	TC	TC	TC	CC	CC	CC	CC	TT	TC	CC	CC	CC	CC	CC	TC	CC	CC	TC	CC	NN	CC	CC	CC	TC	TC	TC	CC	CC	CC	CC	TC	TC	CC	CC	CC	TC	CC	TC	CC	CC	TC	CC	TC	CC	TC	TC
SSL2.50ch01_2149866	A	T	AA	AA	AA	AA	TT	AT	TT	AA	AA	AT	TT	AA	TT	TT	AT	AA	AA	AA	AA	AA	NN	AA	AA	AA	AA	AA	AA	AA	AA	AA	AA	AA	AA	AA	AA	AA	AA	AA	AT	AA	AA	AA	AA	AA	AA	AA	AA
SSL2.50ch01_2162855	G	A	AA	GG	NN	GG	GG	GA	GG	GG	GG	GG	GG	GG	GG	GG	GG	AA	GG	GG	AA	GG	GG	GG	GG	AA	GA	GA	AA	AA	GG	GG	GG	GG	NN	AA	GA	GG	GG	GG	GG	GG	GG	GA	GG	GG	GG	GG	GG
SSL2.50ch01_2163005	G	T	GG	GG	GG	GG	GG	GG	GG	GG	GG	GG	GG	GG	GG	GG	GT	GG	GT	GG	GG	TT	GG	GT	GG	GG	GG	GT	GG	GG	TT	TT	TT	TT	TT	GG	GG	GG	GG	GG	GG	GG	GG	GG	GG	GG	GG	TT	TT
SSL2.50ch01_2179627	A	T	AA	AA	AA	AA	AA	TT	AA	TT	TT	TT	AA	TT	AA	TT	TA	AA	AA	AA	AA	AA	TT	TA	TT	TT	AA	AA	TT	AA	AA	AA	AA	AA	AA	AA	AA	TA	AA	AA	AA	AA	AA	TA	AA	AA	AA	TT	TT
SSL2.50ch01_2179662	T	C	TT	TT	TT	TT	TT	CT	TT	TT	TT	TT	TT	TT	TT	TT	TT	TT	TT	TT	TT	TT	TT	TT	CC	TT	TT	TT	TT	TT	TT	TT	TT	TT	TT	TT	TT	CT	TT	TT	TT	TT	TT	CT	TT	TT	TT	TT	TT
SSL2.50ch01_2188226	C	T	CC	CC	CC	CC	CC	CC	TT	CC	CC	CC	CC	CC	CC	CC	CT	CC	CC	CC	CC	TT	CC	TT	CC	TT	CC	CC	CC	CC	TT	TT	TT	TT	CC	CC	NN	CC	CC	CC	TT	TT	CC	TT	CC	CC	CC	CC	TT
SSL2.50ch01_2188274	T	C	CC	CC	TT	CC	TT	CT	TT	CC	CC	CT	CC	TT	CC	CC	CT	CC	CT	TT	CC	TT	CC	TT	CC	TT	CT	TT	CC	TT	TT	TT	TT	TT	TT	CC	NN	TT	TT	TT	TT	TT	TT	TT	CC	TT	TT	TT	TT
SSL2.50ch01_2205175	C	T	CC	TT	CC	CC	CC	CC	TT	CC	CC	CC	CC	CC	CC	CC	TC	CC	CC	CC	CC	CC	CC	TT	CC	CC	CC	CC	CC	CC	CC	CC	CC	CC	CC	CC	CC	CC	CC	CC	CC	CC	CC	CC	CC	CC	CC	CC	CC
SSL2.50ch01_2205185	A	G	AA	AA	AA	AA	AA	GA	AA	AA	GG	GA	AA	AA	GG	GG	GA	AA	GA	AA	AA	AA	GG	AA	AA	AA	GG	GA	AA	AA	AA	AA	AA	GG	AA	AA	AA	AA	AA	AA	AA	AA	AA	AA	AA	AA	AA	AA	AA
SSL2.50ch01_2205649	T	G	TT	TT	TT	TT	TT	GG	TT	TT	NN	GT	TT	TT	GG	GG	GT	TT	GT	TT	TT	TT	GG	NN	TT	TT	GG	GT	TT	TT	TT	TT	TT	GG	TT	TT	TT	TT	TT	TT	TT	TT	TT	TT	TT	TT	TT	TT	TT
SSL2.50ch01_2205676	G	C	GG	GG	GG	GG	GG	CC	GG	GG	NN	CG	GG	GG	CC	CC	CG	GG	CG	GG	GG	GG	CC	NN	GG	GG	CC	CG	GG	GG	GG	GG	GG	CC	GG	GG	GG	GG	GG	GG	GG	GG	GG	GG	GG	GG	GG	GG	GG
SSL2.50ch01_2210503	C	A	CC	CC	CC	CC	AA	CA	CC	CC	AA	AA	CC	CC	AA	AA	CC	CC	AA	AA	CC	CC	AA	CC	AA	CC	AA	CA	CC	CC	CC	CC	CC	AA	CC	CC	CC	CA	AA	CC	CA	CC	CC	CA	CC	CC	CA	CC	CC
SSL2.50ch01_2210557	T	C	TT	CC	CC	CC	TT	TT	CC	TT	TT	TT	CC	CC	TT	TT	CC	TT	TT	TT	TT	TT	TT	CC	TT	TT	TT	TC	TT	CC	TT	TT	TT	TT	TT	TT	TC	TT	TT	CC	TT	CC	TT	TT	TT	CC	TC	TC	CC
SSL2.50ch01_2227784	T	A	AA	NN	TT	TT	TT	TT	AA	TT	TT	AA	AA	AA	TT	AA	AA	TT	TT	TT	TT	TT	AA	AA	NN	TT	NN	TT	TT	TT	TT	TT	TT	AA	TT	TT	TT	TT	TT	TT	TT	TT	TT	TT	AA	TT	AT	TT	TT
SSL2.50ch01_2227785	A	T	TT	NN	AA	AA	AA	AA	TT	AA	AA	TT	TT	TT	AA	TT	TT	AA	AA	AA	AA	AA	TT	TT	NN	AA	NN	AA	AA	AA	AA	AA	AA	TT	AA	AA	AA	AA	AA	AA	AA	AA	AA	AA	TT	AA	AT	AA	AA
SSL2.50ch01_2246201	T	C	TT	TT	TT	CC	CC	TC	TT	TT	TT	TT	TT	CC	CC	TT	TT	TT	TT	TT	TT	TT	TT	NN	TT	NN	TT	TT	TT	TT	TT	TT	TT	TT	TT	TT	TT	TT	TT	TT	TT	TT	TT	CC	TT	TT	TT	TT	TT
SSL2.50ch01_2256519	C	T	NN	CC	CC	CC	CC	CC	CC	CC	CC	CC	CC	CC	CC	CC	CC	CC	CT	TT	CC	CC	CC	NN	CC	CC	CC	NN	CC	CC	CC	CC	CC	CC	CC	CC	CC	NN	CC	CC	CC	CC	CC	NN	TT	CC	CC	NN	NN
SSL2.50ch01_2262708	A	T	AA	AA	TT	AA	AA	AA	AA	AA	AA	AA	AA	AA	AA	AA	AA	AA	AT	TT	AA	AA	AA	AA	AA	AA	AA	AT	AA	AA	AA	AA	AA	AA	AA	AA	AT	AA	AA	AA	AA	AA	AA	AA	TT	AA	AA	TT	AA
SSL2.50ch01_2282911	A	G	AA	AA	GG	AA	AA	AA	GG	AA	AA	AA	AA	AA	AA	AA	AA	AA	AA	AA	AA	AA	AA	AA	AA	AA	AA	AA	AA	AG	AA	AA	AA	AA	GG	AA	AA	AA	AA	AA	AA	AA	AA	AG	NN	AA	AA	AG	AA
SSL2.50ch01_2310758	A	G	AA	AA	AA	AA	GG	GG	AA	GG	GG	GG	GG	GG	GG	GG	GA	AA	AA	AA	AA	AA	GG	GA	GG	AA	AA	GG	AA	GA	AA	AA	AA	AA	GG	AA	GA	GA	AA	AA	AA	AA	GG	GA	AA	AA	AA	GA	AA
SSL2.50ch01_2349120	T	C	TT	TT	TT	NN	TT	NN	TT	CC	TT	NN	TT	CC	TT	CC	CT	TT	TT	TT	TT	TT	TT	TT	TT	TT	TT	CT	TT	TT	TT	TT	TT	TT	CC	NN	TT	TT	TT	TT	TT	CC	TT	TT	CC	TT	CC	CC	CC
SSL2.50ch01_2350334	T	G	TT	TT	TT	TT	TT	GG	TT	GG	GG	GG	GG	GG	GG	GG	TG	TT	TT	TT	TT	TT	GG	TG	TT	NN	TT	TG	TT	TT	TT	TT	TT	TT	GG	GG	TT	NN	TT	TT	TT	GG	TT	TT	GG	TT	TG	TG	GG
SSL2.50ch01_2350398	G	A	NN	GG	NN	GG	GG	NN	GG	GG	NN	AG	AA	AA	GG	GG	GG	GG	GG	GG	GG	GG	GG	GG	GG	GG	GG	AA	GG	NN	NN	GG	GG	GG	NN	GG	GG	AA	GG	GG	GG	AA	GG	GG	AA	GG	GG	AG	AA
SSL2.50ch01_2358915	G	C	GG	GG	GG	GG	GG	GG	GG	GG	GG	GG	GG	GG	GG	NN	GG	GG	CG	CC	GG	GG	GG	GG	GG	NN	GG	CG	NN	NN	GG	GG	GG	GG	CC	GG	GG	GG	GG	GG	GG	CC	GG	GG	CC	GG	GG	CG	CC
SSL2.50ch01_2377224	A	G	AA	GG	AA	AA	GG	GG	GG	GG	GG	GG	GG	GG	GG	GG	AG	AA	AG	AA	AA	AA	GG	NN	AA	AA	AA	AA	AA	NN	AA	AA	AA	AA	AA	AA	AA	AG	AA	AA	AA	AA	AA	AG	AA	AA	AA	AA	AA
SSL2.50ch01_2392512	C	T	CC	CC	TT	CC	CC	TC	CC	CC	CC	CC	CC	CC	TT	CC	CC	CC	CC	CC	CC	TT	CC	CC	CC	CC	TC	CC	TT	TC	TT	TT	TT	CC	TT	CC	TC	TC	TT	TT	TC	CC	CC	TC	CC	CC	TC	TC	TT
SSL2.50ch01_2392599	T	C	TT	TT	TT	TT	TT	TT	TT	TT	TT	TT	TT	TT	TT	TT	TT	CC	TT	TT	TT	NN	TT	TT	TT	TT	NN	TT	TT	TT	TT	TT	TT	TT	TT	TT	TT	TT	TT	TT	TT	TT	TT	TT	TT	TT	TT	TT	TT
SSL2.50ch01_2394510	A	G	AA	AA	GG	AA	AA	GG	AA	AA	AA	AA	AA	AA	GG	AA	AA	AA	AA	AA	AA	GG	AA	AA	AA	AA	AG	AA	GG	AG	GG	GG	GG	AA	GG	AA	AG	AG	AA	GG	AA	AA	AA	AG	AA	AA	AG	AG	GG
SSL2.50ch01_2400537	G	A	GG	GG	GG	GG	GG	AA	GG	AA	AA	AA	AA	AA	AA	AA	AG	GG	GG	GG	GG	GG	AA	GG	GG	GG	GG	GG	GG	AG	GG	GG	GG	GG	GG	GG	GG	GG	GG	GG	GG	GG	GG	GG	GG	GG	GG	GG	GG
SSL2.50ch01_2400576	A	G	GG	AA	AA	AA	AA	GG	AA	GG	GG	GG	GG	GG	GG	GG	AG	GG	AA	AA	AA	AA	GG	AA	AA	AA	AG	AA	GG	AG	AA	AA	AA	GG	AA	AA	AA	AA	GG	GG	AA	AA	AA	AA	AA	AA	AA	AA	GG
SSL2.50ch01_2404603	C	T	CC	CC	CC	CC	NN	TT	CC	TT	TT	TT	TT	CC	CC	TT	TT	CC	CC	CC	CC	CC	TT	CC	CC	CC	CC	CC	TT	CC	CC	CC	CC	CC	CC	NN	CC	CC	CC	TT	CC	CC	CC	CC	CC	CC	CC	CC	NN
SSL2.50ch01_2414176	C	T	CC	CC	CC	NN	TT	NN	CC	TT	NN	TT	TT	TT	CC	TT	TT	CC	CC	CC	TT	CC	TT	TT	TT	NN	CC	CC	CC	CT	CC	CC	CC	CC	NN	CC	CT	NN	TT	CC	CT	CC	CC	CC	TT	TT	CC	CT	TT
SSL2.50ch01_2415782	A	G	AA	AA	AA	AA	AA	AA	AA	AA	AA	AA	AA	AA	AA	AA	AA	AA	AA	AA	GG	AA	AA	AA	AA	GG	AA	AA	AA	AA	AA	AA	AA	AA	AA	AA	AA	AG	AA	AA	AG	AA	AA	AA	AA	GG	AA	AG	AA
SSL2.50ch01_2415823	T	C	TT	TT	TT	TT	TT	TT	TT	TT	TT	TT	TT	TT	TT	TT	TT	TT	TT	TT	CC	TT	TT	TT	TT	CC	TT	TT	TT	TT	TT	TT	TT	TT	TT	TT	TT	CT	TT	TT	CT	TT	TT	TT	TT	CC	TT	CT	TT
SSL2.50ch01_2415824	C	A	CC	CC	CC	CC	CC	CC	CC	CC	CC	CC	CC	CC	CC	CC	CC	CC	CC	CC	AA	CC	CC	CC	CC	AA	CC	CC	CC	CC	CC	CC	CC	CC	CC	CC	CC	AC	CC	CC	AC	CC	CC	CC	CC	AA	CC	AC	CC
SSL2.50ch01_2431213	C	T	CC	CC	NN	NN	TT	NN	CC	TT	NN	TC	CC	CC	TT	TT	NN	CC	TT	TT	CC	CC	CC	CC	TT	CC	CC	TT	TT	CC	NN	CC	TT	NN	TT	NN	CC	CC	CC	TT	TT	TT	CC	CC	CC	CC	CC	TC	CC
SSL2.50ch01_2441106	T	A	TT	TT	TT	TT	TT	AT	TT	AA	TT	TT	TT	TT	AA	TT	TT	TT	AT	AA	TT	TT	TT	TT	AA	TT	TT	AT	AA	TT	TT	TT	TT	TT	TT	TT	TT	TT	TT	AA	AT	TT	TT	AT	TT	TT	TT	TT	TT
SSL2.50ch01_2468633	G	A	GG	GG	GG	GG	GG	GG	GG	GG	GG	GA	NN	AA	GG	GG	GG	GG	GA	AA	GG	NN	GG	GG	GG	GG	GG	GG	GG	GG	GG	NN	GG	NN	GG	GG	GG	GG	GG	GG	GG	GG	GG	GG	GG	GG	GG	GA	GG
SSL2.50ch01_2468659	C	T	CC	CC	CC	CC	CC	TT	TT	TT	CC	TT	NN	TT	TT	TT	TC	CC	TC	TT	CC	NN	TT	CC	CC	CC	CC	CC	CC	CC	CC	NN	CC	NN	TT	CC	CC	TC	CC	CC	CC	CC	CC	CC	CC	CC	CC	TC	CC
SSL2.50ch01_2468681	A	T	AA	AA	AA	AA	AA	TT	TT	TT	AA	TA	NN	AA	TT	TT	TA	AA	AA	AA	AA	NN	TT	AA	AA	AA	AA	AA	AA	AA	AA	NN	AA	NN	TT	AA	AA	TA	AA	AA	AA	AA	AA	AA	AA	AA	AA	AA	AA
SSL2.50ch01_2468718	T	G	TT	TT	TT	TT	TT	GG	GG	GG	TT	GT	NN	TT	GG	GG	NN	TT	TT	TT	TT	NN	GG	TT	TT	NN	NN	TT	NN	TT	TT	NN	TT	NN	GG	TT	TT	GT	TT	TT	TT	TT	TT	TT	TT	TT	TT	TT	TT
SSL2.50ch01_2468725	G	A	GG	GG	GG	GG	GG	GG	GG	GG	GG	AG	NN	AA	GG	GG	GG	GG	GG	AA	GG	NN	GG	GG	GG	NN	NN	GG	NN	GG	GG	NN	GG	NN	GG	GG	GG	GG	GG	GG	GG	GG	GG	GG	GG	GG	GG	AG	GG
SSL2.50ch01_2468754	A	T	TT	TT	AA	TT	AA	AA	AA	AA	AA	AA	NN	AA	AA	AA	NN	AA	AA	AA	AA	NN	AA	TT	AA	NN	NN	AT	NN	AA	AA	NN	AA	NN	AA	AA	AA	AA	AA	AA	AA	AA	AA	AA	AA	AA	AA	AA	AA
SSL2.50ch01_2468787	A	G	AA	AA	AA	AA	AA	GG	GG	GG	AA	GG	NN	GG	GG	GG	NN	AA	AA	GG	AA	NN	GG	AA	AA	NN	NN	AA	NN	AA	AA	NN	AA	NN	GG	AA	AA	AG	AA	AA	AA	AA	AA	AA	AA	AA	AA	AG	AA
SSL2.50ch01_2470266	C	T	CC	CC	CC	NN	CC	TT	TT	TT	CC	TC	CC	CC	TT	TT	TC	CC	CC	CC	CC	CC	TT	CC	CC	CC	CC	CC	CC	CC	TC	CC	CC	CC	NN	CC	CC	NN	CC	CC	CC	CC	CC	CC	CC	CC	CC	CC	CC
SSL2.50ch01_2470307	C	T	CC	CC	CC	NN	CC	CC	CC	CC	CC	TC	CC	TT	CC	CC	CC	CC	TC	TT	CC	CC	CC	CC	CC	CC	CC	CC	CC	CC	CC	CC	CC	CC	NN	CC	CC	NN	CC	CC	CC	CC	CC	CC	CC	CC	CC	CC	CC
SSL2.50ch01_2470324	A	T	AA	AA	AA	NN	AA	AA	AA	AA	AA	AA	TT	AA	AA	AA	AA	AA	AA	AA	AA	TT	AA	TA	AA	AA	TT	AA	AA	AA	AA	TT	AA	TT	NN	AA	AA	NN	AA	AA	AA	AA	AA	AA	AA	AA	AA	AA	AA
SSL2.50ch01_2470339	G	A	GG	GG	GG	NN	GG	GG	GG	GG	GG	GA	GG	AA	GG	GG	GG	GG	GA	AA	GG	GG	GG	GG	GG	GG	GG	GG	GG	GG	GG	GG	GG	GG	NN	GG	GG	NN	GG	GG	GG	GG	GG	GG	GG	GG	GG	GG	GG
SSL2.50ch01_2470365	T	C	TT	TT	TT	TT	TT	TT	TT	TT	TT	CT	TT	CC	TT	TT	TT	TT	CT	CC	TT	TT	TT	TT	TT	TT	TT	TT	TT	TT	TT	TT	TT	TT	TT	TT	TT	NN	TT	TT	TT	TT	TT	TT	TT	TT	TT	CT	TT
SSL2.50ch01_2470427	T	A	TT	TT	TT	TT	TT	AA	AA	AA	TT	AT	TT	TT	AA	AA	AT	TT	TT	TT	TT	TT	AA	TT	TT	TT	TT	TT	TT	TT	TT	TT	TT	TT	TT	TT	TT	NN	TT	TT	TT	TT	TT	TT	TT	TT	TT	TT	TT
SSL2.50ch01_2470428	G	A	GG	GG	GG	GG	GG	AA	AA	AA	GG	AA	GG	AA	AA	AA	AG	GG	AG	AA	GG	GG	AA	GG	GG	GG	GG	GG	GG	GG	GG	GG	GG	GG	GG	GG	GG	NN	GG	GG	GG	GG	GG	GG	GG	GG	GG	AG	GG
SSL2.50ch01_2470438	T	C	TT	TT	TT	TT	TT	CC	CC	CC	TT	CT	TT	TT	CC	CC	CT	TT	TT	TT	TT	TT	CC	TT	TT	TT	TT	TT	TT	TT	TT	TT	TT	TT	TT	TT	TT	NN	TT	TT	TT	TT	TT	TT	TT	TT	TT	TT	TT
SSL2.50ch01_2472652	T	C	TT	TT	TT	CC	CC	TT	TT	TT	TT	TC	TT	CC	TT	TT	TT	NN	CC	CC	CC	TT	TT	TT	CC	CC	CC	TT	TT	TT	TT	TT	TT	NN	TT	TT	TC	TC	TT	TT	TT	TT	TT	TT	TT	TT	TT	CC	CC
SSL2.50ch01_2473371	C	T	CC	CC	CC	TT	TT	CC	TT	CC	NN	CT	CC	TT	CC	CC	CC	NN	TT	TT	CC	CC	CC	CC	TT	CC	TT	CC	CC	CC	CC	CC	CC	CC	CC	CC	CC	CC	CC	CC	TT	CC	TT	CT	CC	CC	CC	CC	TT
SSL2.50ch01_2473394	A	G	AA	AA	AA	GG	GG	AA	GG	AA	NN	AG	AA	GG	AA	AA	AA	NN	GG	GG	AA	AA	AA	AA	GG	AA	GG	AA	AA	AA	AA	AA	AA	AA	AA	AA	AA	AA	AA	AA	GG	AA	GG	AG	AA	AA	AA	AA	GG
SSL2.50ch01_2473405	C	A	CC	CC	CC	AA	AA	CC	CC	CC	NN	AC	CC	AA	CC	CC	CC	NN	AA	AA	CC	CC	CC	CC	CC	CC	CC	CC	CC	CC	CC	CC	CC	CC	CC	CC	CC	CC	CC	CC	AA	CC	AA	AC	CC	CC	CC	CC	CC
SSL2.50ch01_2473420	C	G	CC	CC	CC	GG	GG	CC	GG	CC	NN	CG	CC	GG	CC	CC	CC	NN	GG	GG	CC	CC	CC	CC	GG	CC	GG	CC	CC	CC	CC	CC	CC	CC	CC	CC	CC	CC	CC	CC	GG	CC	GG	CG	CC	CC	CC	CC	GG
SSL2.50ch01_2478676	G	A	GG	GG	GG	GG	GG	GA	GG	GG	GG	GG	GG	GG	GG	GG	GG	GG	GG	GG	AA	GG	GG	GG	GG	AA	GG	AA	AA	GA	AA	GG	AA	GG	GG	GG	GG	GA	GG	AA	GG	AA	GG	GG	AA	AA	AA	GG	GG
SSL2.50ch01_2478734	T	C	TT	TT	TT	CC	CC	TT	CC	TT	TT	TC	TT	CC	TT	TT	TT	TT	CC	CC	TT	TT	TT	TT	CC	TT	CC	TT	TT	TT	TT	TT	TT	TT	CC	TT	TT	TT	TT	TT	CC	TT	CC	CC	TT	TT	TT	NN	CC
SSL2.50ch01_2482144	C	T	TT	TT	TT	CC	CC	CT	CC	TT	TT	CT	TT	CC	TT	TT	TT	TT	CC	CC	CC	TT	CC	TT	CC	CC	CC	CT	CC	CC	CC	TT	CC	TT	CC	TT	NN	CT	CC	CC	CC	CC	CC	CC	CC	CC	CC	CT	CC
SSL2.50ch01_2482150	C	A	AA	AA	AA	CC	CC	AC	CC	AA	AA	AC	AA	CC	AA	AA	AA	AA	CC	CC	CC	AA	CC	AA	CC	CC	CC	AC	CC	CC	CC	AA	CC	AA	CC	AA	NN	AC	CC	CC	CC	CC	CC	CC	CC	CC	CC	AC	CC
SSL2.50ch01_2482160	C	G	CC	CC	CC	CC	CC	CC	CC	CC	CC	CC	CC	CC	CC	CC	CC	CC	CC	CC	CC	CC	GG	CC	CC	CC	CC	CC	CC	GG	CC	CC	CC	CC	CC	CC	NN	CC	GG	CC	CC	CC	CC	CG	CC	GG	CG	CC	CC
SSL2.50ch01_2482168	G	T	TT	TT	TT	GG	GG	GT	GG	TT	TT	GT	TT	GG	TT	TT	TT	TT	GG	GG	GG	TT	GG	TT	GG	GG	GG	GT	GG	GG	GG	TT	GG	TT	GG	TT	NN	GT	GG	GG	GG	GG	GG	GG	GG	GG	GG	GT	GG
SSL2.50ch01_2482186	C	A	AA	AA	AA	CC	CC	AC	CC	AA	AA	AC	AA	CC	AA	AA	AA	AA	CC	CC	CC	AA	CC	AA	CC	CC	CC	AC	CC	CC	CC	AA	CC	AA	CC	AA	NN	AC	CC	CC	CC	CC	CC	CC	CC	CC	CC	AC	CC
SSL2.50ch01_2482192	A	G	GG	GG	GG	AA	AA	AG	AA	GG	GG	AG	GG	AA	GG	GG	GG	GG	AA	AA	AA	GG	AA	GG	AA	AA	AA	AG	AA	AA	AA	GG	AA	GG	AA	GG	NN	AG	AA	AA	AA	AA	AA	AA	AA	AA	AA	AG	AA
SSL2.50ch01_2482209	A	T	TT	TT	TT	AA	AA	AT	AA	TT	TT	AT	TT	AA	TT	TT	TT	TT	AA	AA	AA	TT	AA	TT	AA	AA	AA	AT	AA	AA	AA	TT	AA	TT	AA	TT	NN	AT	AA	AA	AA	AA	AA	AA	AA	AA	AA	AT	AA
SSL2.50ch01_2482218	G	A	GG	GG	GG	GG	GG	AG	GG	GG	GG	GG	GG	GG	GG	GG	GG	GG	GG	GG	AA	GG	AA	GG	GG	AA	GG	AG	AA	AA	AA	GG	AA	GG	GG	GG	NN	AG	AA	AA	GG	AA	GG	AG	AA	AA	AA	GG	GG
SSL2.50ch01_2485796	T	A	TT	TT	TT	AA	AA	TA	AA	TT	TT	TA	TT	AA	TT	TT	TT	TT	TA	TT	AA	TT	TT	TT	AA	AA	AA	TT	AA	TA	AA	TT	AA	TT	AA	TT	TT	NN	TT	AA	AA	AA	AA	TA	AA	TT	TA	TA	AA
SSL2.50ch01_2485837	G	T	GG	GG	GG	TT	TT	TG	TT	GG	GG	TG	GG	TT	GG	GG	GG	GG	TG	GG	TT	GG	GG	GG	TT	TT	TT	GG	TT	TG	TT	GG	TT	GG	TT	GG	GG	NN	GG	TT	TT	TT	TT	TG	TT	GG	TG	TG	TT
SSL2.50ch01_2485862	G	C	GG	GG	GG	CC	CC	NN	CC	GG	NN	CG	GG	CC	GG	GG	GG	GG	CG	GG	CC	GG	GG	GG	CC	CC	CC	GG	CC	CG	CC	GG	CC	GG	CC	GG	GG	CG	GG	CC	CC	CC	CC	CG	CC	GG	CG	CG	CC
SSL2.50ch01_2485863	T	A	TT	AA	TT	TT	TT	TT	TT	TT	NN	TT	TT	TT	TT	TT	AT	TT	TT	TT	TT	TT	TT	AT	TT	TT	TT	TT	TT	AT	TT	TT	TT	TT	TT	TT	TT	TT	TT	TT	TT	TT	TT	TT	TT	AA	AT	TT	TT
SSL2.50ch01_2485864	A	T	AA	TT	AA	AA	AA	AA	AA	AA	NN	AA	AA	AA	AA	AA	AT	AA	AA	AA	AA	AA	AA	AT	AA	AA	AA	AA	AA	AT	AA	AA	AA	AA	AA	AA	AA	AA	AA	AA	AA	AA	AA	AA	AA	TT	AT	AA	AA
SSL2.50ch01_2485907	A	C	AA	AA	AA	CC	CC	NN	CC	AA	NN	AC	AA	CC	AA	AA	AA	AA	AC	AA	CC	AA	AA	AA	CC	CC	CC	AA	CC	AC	CC	AA	CC	AA	CC	AA	AA	AC	AA	CC	CC	CC	CC	AC	CC	AA	AC	AC	CC
SSL2.50ch01_2487919	C	T	CT	CT	CT	NN	CC	TT	NN	CC	CT	CC	CT	CC	CT	CC	CT	CT	CC	CC	CC	CT	CT	TT	CC	CT	CC	CC	NN	CC	CT	CC	CT	CT	CC	CT	NN	TT	CT	NN	CT	CC	CC	CT	CC	CT	CC	CT	CT
SSL2.50ch01_2487962	C	T	CC	CC	CC	NN	CC	CC	NN	CC	CT	CC	CC	CC	CT	CC	CC	CC	CC	CC	CC	CC	CC	CC	CC	CC	CC	CC	NN	CC	CC	CC	CC	CC	CC	CC	NN	CC	CT	NN	CC	CC	CC	CC	CC	CC	CC	CC	CC
SSL2.50ch01_2487963	C	G	CG	CG	CG	NN	CC	GG	NN	CC	CG	CC	CG	CC	CG	CC	CG	CG	CC	CC	CC	CG	CG	GG	CC	CG	CC	CC	NN	CC	CG	CC	CG	CG	CC	CG	NN	GG	CG	NN	CG	CC	CC	CG	CC	CG	CC	CG	CG
SSL2.50ch01_2489961	C	T	CC	CC	CC	CC	CC	CC	CC	TT	NN	CC	CC	CC	TC	CC	CC	CC	TC	TC	TC	TC	CC	CC	CC	NN	CC	CC	CC	CC	CC	CC	CC	TC	TC	TT	CC	CC	CC	CC	TC	TC	CC	CC	CC	CC	TC	CC	CC
SSL2.50ch01_2490429	G	C	CC	CC	CC	GG	GG	GG	CG	CC	CC	CG	GG	GG	CG	CC	CC	CC	CG	CG	GG	NN	CC	CC	GG	GG	GG	CG	GG	CG	GG	CC	GG	CG	GG	GG	CG	CG	CC	GG	GG	GG	GG	CG	GG	CC	GG	GG	GG
SSL2.50ch01_2492935	A	T	AA	AA	AA	AA	TT	AA	TA	TT	NN	TA	AA	TT	AA	AA	AA	AA	TA	NN	TA	AA	AA	AA	TT	TA	TT	TA	AA	TT	TA	AA	TA	TA	TA	TT	AA	TA	AA	AA	AA	TT	TA	AA	TA	AA	TA	AA	TA
SSL2.50ch01_2492947	A	T	AA	AA	AA	AA	TT	AA	TA	TT	NN	TA	AA	TT	AA	AA	AA	AA	TT	TT	TA	AA	AA	AA	TT	TA	TA	TT	AA	TT	TA	AA	TA	TA	TA	TT	AA	TT	AA	AA	AA	TA	TA	AA	TA	AA	AA	AA	AA
SSL2.50ch01_2492948	C	A	CC	CC	CC	CC	AA	CC	CA	AA	NN	CA	CC	AA	CC	CC	CC	CC	AA	AA	CA	CC	CC	CC	AA	CA	AA	AA	CC	AA	CA	CC	CA	CA	CA	AA	CC	AA	CC	CC	CC	AA	CA	CC	CA	CC	CA	CC	CA
SSL2.50ch01_2492952	T	A	TT	TA	TT	TA	TT	TA	TT	TA	NN	TT	TT	TA	TA	TT	TA	TA	TT	TA	TT	TT	TT	TA	TA	TT	TT	TT	TA	TA	TT	TA	TT	TT	TT	TA	TA	TT	TA	TA	TA	TT	TT	TA	TT	TA	TT	TA	TT
SSL2.50ch01_2492975	A	G	AA	AA	AA	AA	GG	AA	GA	GA	NN	GA	AA	GA	AA	AA	AA	AA	GG	GA	GA	AA	AA	AA	GA	GA	GG	GG	AA	GA	GA	AA	GA	GA	AA	GA	AA	GA	AA	AA	AA	GG	GA	AA	GA	AA	GA	AA	GA
SSL2.50ch01_2492998	G	C	GG	GC	GG	GG	GG	GC	GG	GC	NN	GG	GG	GC	GC	GG	GC	GC	GG	GC	GG	GG	GG	GC	GC	GG	GG	GG	GC	GC	GG	GC	GG	GG	GG	GG	GG	GG	GG	GC	GC	GG	GG	GG	GG	GC	GG	GG	GG
SSL2.50ch01_2492999	A	G	AA	AA	AA	GA	AA	GA	AA	AA	NN	GA	AA	AA	GA	GG	GA	AA	AA	AA	GA	AA	AA	AA	AA	GA	AA	AA	GA	AA	GA	AA	GA	AA	AA	AA	AA	AA	AA	GA	GA	AA	AA	AA	GA	AA	AA	AA	AA
SSL2.50ch01_2493017	T	A	TT	TT	TT	TT	TT	TT	TT	TT	TT	TT	TT	TT	TT	TT	TT	TT	TT	TT	AT	AT	TT	TT	TT	AT	TT	AT	TT	AT	AT	TT	AT	AT	TT	TT	TT	AT	TT	TT	TT	TT	TT	TT	AT	TT	TT	TT	TT
SSL2.50ch01_2493057	A	G	AA	AA	AA	AA	GG	AA	AG	GG	AA	AG	AA	GG	GG	AA	AA	AA	GG	GG	AG	AG	AA	AA	GG	AG	GG	GG	AA	GG	AG	AA	AG	AG	AG	GG	AA	AG	AA	AA	AA	GG	AG	AA	AG	AA	AG	AA	AG
SSL2.50ch01_2493068	A	C	CC	CC	CC	AA	AA	AA	AA	AA	CC	AA	CC	AA	AA	AA	AC	CC	AA	AA	AA	AC	AA	AC	AA	AA	AA	AA	AA	AA	AA	CC	AA	AC	AC	AA	AC	AA	CC	AA	AC	AA	AC	AA	AA	CC	AA	AC	AC
SSL2.50ch01_2493081	G	A	GG	GG	GG	GG	AA	GG	AG	AA	GG	AG	GG	AA	AA	GG	GG	GG	AA	AA	AG	AG	GG	GG	AA	AG	AA	AA	GG	AA	AG	GG	AG	AG	AG	AA	GG	AG	GG	GG	GG	AA	AG	GG	AG	GG	AG	GG	AG
SSL2.50ch01_2542399	T	A	TT	TT	TT	TT	AA	TT	TT	AA	AA	TT	TT	TT	TT	TT	TT	TT	TT	TT	TT	AA	TT	TT	AA	TT	TT	TT	TT	TT	TT	AA	TT	AA	TT	TT	TT	TT	TT	TT	TT	TT	TT	TT	TT	TT	TT	TT	TT
SSL2.50ch01_2542403	A	G	AA	AA	AA	AA	GG	AA	AA	GG	GG	AA	AA	AA	AA	AA	AA	AA	AA	AA	AA	GG	AA	AA	GG	AA	AA	AA	AA	AA	AA	GG	AA	GG	AA	AA	AA	AA	AA	AA	AA	AA	AA	AA	AA	AA	AA	AA	AA
SSL2.50ch01_2542413	T	G	TT	TT	TT	TT	GG	TT	TT	GG	GG	TT	TT	TT	TT	TT	TT	TT	TT	TT	TT	GG	TT	TT	GG	TT	TT	TT	TT	TT	TT	GG	TT	GG	TT	TT	TT	TT	TT	TT	TT	TT	TT	TT	TT	TT	TT	TT	TT
SSL2.50ch01_2542477	A	T	AA	AA	AA	AA	TT	TT	AA	TT	TT	AT	TT	AA	TT	TT	AA	AA	AA	AA	AA	TT	AA	AT	TT	AA	AA	AT	TT	AA	AA	TT	AA	TT	AA	AA	AA	AA	AA	AA	AT	TT	AA	AT	AA	AA	AA	AA	AA
SSL2.50ch01_2544836	C	G	CC	CC	CC	CC	CC	CC	CC	GG	NN	CC	CC	CC	CC	CC	CC	CC	CC	CC	CC	CC	CC	CC	GG	CC	CC	CC	CC	NN	CC	CC	CC	CC	CC	CC	CC	CC	CC	CC	CC	CC	CC	CC	CC	CC	CC	CC	CC
SSL2.50ch01_2544842	G	A	GG	GG	GG	GG	GG	GG	GG	AA	NN	GG	GG	GG	GG	GG	GG	GG	GG	GG	GG	GG	GG	GG	AA	GG	GG	GG	GG	NN	GG	GG	GG	GG	GG	GG	GG	GG	GG	GG	GG	GG	GG	GG	GG	GG	GG	GG	GG
SSL2.50ch01_2544865	T	C	TT	TT	TT	TT	CC	CC	TT	CC	NN	TC	CC	TT	CC	CC	CC	TT	TT	TT	TT	CC	TT	TC	CC	TT	TT	TC	CC	NN	TT	CC	TT	CC	TT	TT	TT	TT	TT	TT	TC	CC	TT	TC	TT	TT	TT	TT	TT
SSL2.50ch01_2544960	T	A	TT	TT	TT	TT	TT	TT	TT	TT	TT	TT	TT	TT	TT	TT	TT	TT	TT	TT	TT	TT	TT	TT	AA	TT	TT	TT	TT	TT	TT	TT	TT	TT	TT	TT	TT	TT	TT	TT	TT	TT	TT	TT	TT	TT	TT	TT	TT
SSL2.50ch01_2544992	C	G	CC	CC	CC	CC	CC	CC	CC	GG	GG	CC	CC	CC	CC	CC	CC	CC	CC	CC	CC	CC	CC	CC	GG	CC	CC	CC	CC	CC	CC	CC	CC	CC	CC	CC	CC	CC	CC	CC	CC	CC	CC	CC	CC	CC	CC	CC	CC
SSL2.50ch01_2545000	C	A	CC	CC	CC	CC	CC	CC	CC	AA	AA	CC	CC	CC	CC	CC	CC	CC	CC	CC	CC	CC	CC	CC	AA	CC	CC	CC	CC	CC	CC	CC	CC	CC	CC	CC	CC	CC	CC	CC	CC	CC	CC	CC	CC	CC	CC	CC	CC
SSL2.50ch01_2545006	G	A	GG	GG	GG	GG	GG	GG	GG	AA	AA	GG	GG	GG	GG	GG	GG	GG	GG	GG	GG	GG	GG	GG	AA	GG	GG	GG	GG	GG	GG	GG	GG	GG	GG	GG	GG	GG	GG	GG	GG	GG	GG	GG	GG	GG	GG	GG	GG
SSL2.50ch01_2547166	C	A	CC	CC	CC	CC	CC	CC	CC	CC	NN	CC	CC	CC	CC	CC	CC	CC	CC	CC	CC	CC	CC	CC	CC	CC	CC	CC	CC	CC	CC	CC	CC	CC	CC	CC	CC	AC	CC	CC	AC	CC	CC	CC	CC	CC	CC	CC	CC
SSL2.50ch01_2573087	G	A	GG	GG	GG	GG	GG	GG	GG	GG	NN	GG	GG	GG	GG	GG	GG	GG	GG	GG	GG	AA	GG	GG	GG	GG	GG	GG	GG	GG	GG	AA	GG	AA	GG	NN	GG	NN	GG	GG	GG	GG	GG	GG	GG	GG	GG	GG	GG
SSL2.50ch01_2612721	G	A	GG	GG	GG	GG	GG	GA	GG	AA	AA	AA	AA	AA	AA	AA	GA	GG	GG	GG	GG	GG	AA	GG	GG	GG	GG	GG	GG	GG	GG	GG	GG	GG	GG	GG	GG	GA	GG	GG	GG	GG	GG	GA	GG	GG	GG	GG	GG
SSL2.50ch01_2612839	G	T	GG	GG	GG	GG	GG	GG	GG	GG	GG	GG	GG	GG	GG	GG	GG	TT	GT	GG	GG	GG	GG	GG	GG	GG	GT	GG	GG	GG	GG	GG	GG	GG	GG	GG	GG	GG	GG	GG	GG	GG	TT	GG	GG	GG	GG	GG	GG
SSL2.50ch01_2612853	T	A	TT	TT	AA	AA	TT	AT	AA	TT	TT	TT	TT	TT	TT	TT	TT	AA	AA	AA	AA	TT	TT	TT	TT	AA	AT	TT	AA	AA	TT	AA	TT	TT	AA	TT	AT	AT	TT	TT	TT	AA	AA	AT	AA	AA	TT	AA	AA
SSL2.50ch01_2612857	C	G	CC	CC	CC	CC	CC	CG	CC	GG	GG	GG	GG	GG	GG	GG	CG	CC	CC	CC	CC	CC	GG	CC	CC	CC	CC	CC	CC	CC	CC	CC	CC	CC	CC	CC	CC	CG	CC	CC	CC	CC	CC	CG	CC	CC	CC	CC	CC
SSL2.50ch01_2640735	C	T	CC	CC	CC	CC	CC	CC	CC	CC	CC	CC	CC	CC	CC	CC	CC	CC	CC	CC	CC	CC	CC	CC	CC	CC	CC	CC	CC	CC	TT	TT	TT	CC	CC	CC	CC	CC	CC	CC	CC	CC	CC	CC	CC	CC	CC	CC	CC
SSL2.50ch01_2640866	C	G	CC	CC	CC	CC	CC	GG	CC	GG	GG	CG	CC	CC	CC	GG	CG	CC	CC	CC	CC	CC	GG	CC	CC	CC	CC	CC	CC	CC	CC	CC	CC	CC	CC	CC	CC	CC	CC	CC	CC	CC	CC	CC	CC	CC	CC	CC	CC
SSL2.50ch01_2688283	C	T	CC	CC	CC	CC	CC	CC	CC	CC	CC	CC	TT	CC	CC	CC	CC	CC	CC	CC	CC	CC	TT	CC	CC	CC	CC	CC	CC	CC	CC	CC	CC	CC	CC	CC	CC	CC	CC	CC	CC	CC	CC	CC	CC	CC	CC	CC	CC
SSL2.50ch01_2688327	A	G	GG	AA	AA	GG	AA	AA	AA	GG	GG	AG	AA	AA	GG	GG	AG	AA	GG	GG	AA	AA	GG	AA	GG	AA	AA	AG	AA	AG	AA	AA	AA	AA	AA	AA	AA	AA	AA	AA	AG	AA	AA	AG	GG	AA	GG	AA	AA
SSL2.50ch01_2688330	A	G	GG	AA	AA	GG	AA	AA	AA	AA	AA	AG	AA	AA	GG	GG	AG	AA	GG	GG	AA	AA	AA	AA	GG	AA	AA	AG	AA	AG	AA	AA	AA	AA	AA	AA	AA	AA	AA	AA	AG	AA	AA	AA	AA	AA	GG	AA	AA
SSL2.50ch01_2721035	A	G	GG	AA	AA	AA	AA	AA	AA	AA	AA	AA	GG	AA	AA	AA	AA	GG	AA	AA	GG	AA	AA	AA	GG	GG	GA	GA	GG	AA	AA	AA	AA	AA	AA	GG	AA	GG	GG	GG	GG	AA	AA	GG	AA	AA	AA	GG	AA
SSL2.50ch01_2721057	A	T	TT	AA	AA	AA	AA	AA	AA	AA	AA	AA	TT	AA	AA	AA	AA	TT	AA	AA	TT	AA	AA	AA	TT	TT	TA	TA	TT	AA	AA	AA	AA	AA	AA	TT	AA	TT	TT	TT	TT	AA	AA	TT	AA	AA	AA	TT	AA
SSL2.50ch01_2721067	T	G	TT	GG	TT	TT	TT	TG	GG	TT	TT	TG	TT	TT	GG	TT	TG	TT	GG	GG	TT	TT	TT	GG	TT	TT	TT	TG	TT	TG	GG	GG	GG	TT	GG	TT	GG	TT	TT	TT	TT	TT	TT	TT	TT	GG	GG	TT	GG
SSL2.50ch01_2742881	T	A	AA	TT	AA	AA	AA	AA	TT	AA	AA	AA	AA	AA	AA	NN	TT	TT	TT	TT	AA	TT	AA	TT	TT	AA	TA	TA	TT	TT	TT	TT	TT	TT	TT	TT	AA	AA	AA	AA	TA	TT	TT	TT	AA	AA	TT	AA	TT
SSL2.50ch01_2748130	G	A	AA	GG	AA	GG	AA	AA	GG	AA	AA	AA	AA	GG	AA	AA	NN	GG	GG	GG	GG	GG	AA	GG	AA	GG	GG	GA	GG	GG	GG	GG	GG	GG	AA	AA	GA	GA	AA	GG	GG	GG	GG	GG	AA	GG	GG	GG	GG
SSL2.50ch01_2750502	G	A	AA	GG	AA	GG	AA	GG	GG	GG	NN	GG	GG	GG	GG	GG	GG	GG	GG	GG	GG	GG	GG	GG	AA	GG	GG	GA	GG	GG	GG	GG	GG	GG	AA	AA	GA	GA	AA	GG	GG	GG	GG	GG	AA	GG	GG	GG	GG
SSL2.50ch01_2750503	G	A	AA	GG	AA	GG	AA	GG	GG	GG	NN	GG	GG	GG	GG	GG	GG	GG	GG	GG	GG	GG	GG	GG	AA	GG	GG	GA	GG	GG	GG	GG	GG	GG	AA	AA	GA	GA	AA	GG	GG	GG	GG	GG	AA	GG	GG	GG	GG
SSL2.50ch01_2750564	A	G	GG	AA	GG	AA	GG	AA	AA	AA	AA	AA	AA	AA	AA	AA	AA	AA	AA	AA	AA	AA	AA	AA	GG	AA	AA	AG	AA	AA	AA	AA	AA	AA	GG	GG	AG	AG	GG	AA	AA	AA	AA	AA	GG	AA	AA	AA	AA
SSL2.50ch01_2750590	C	G	GG	CC	GG	CC	GG	CC	CC	CC	CC	CC	CC	CC	CC	CC	CC	CC	CC	CC	CC	CC	CC	CC	GG	CC	CC	CG	CC	CC	CC	CC	CC	CC	GG	GG	CG	CG	GG	CC	CC	CC	CC	CC	GG	CC	CC	CC	CC
SSL2.50ch01_2750597	T	A	AA	TT	AA	TT	AA	TT	TT	TT	TT	TT	TT	TT	TT	TT	TT	TT	TT	TT	TT	TT	TT	TT	AA	TT	TT	AT	TT	TT	TT	TT	TT	TT	AA	AA	AT	AT	AA	TT	TT	TT	TT	TT	AA	TT	TT	TT	TT
SSL2.50ch01_2750601	G	C	CC	GG	CC	GG	CC	GG	GG	GG	GG	GG	GG	GG	GG	GG	GG	GG	GG	GG	GG	GG	GG	GG	CC	GG	GG	CG	GG	GG	GG	GG	GG	GG	CC	CC	CG	CG	CC	GG	GG	GG	GG	GG	CC	GG	GG	GG	GG
SSL2.50ch01_2750611	T	A	AA	TT	AA	TT	AA	TT	TT	TT	TT	TT	TT	TT	TT	TT	TT	TT	TT	TT	TT	TT	TT	TT	AA	TT	TT	AT	TT	TT	TT	TT	TT	TT	AA	AA	AT	AT	AA	TT	TT	TT	TT	TT	AA	TT	TT	TT	TT
SSL2.50ch01_2750614	T	C	CC	TT	CC	TT	CC	TT	TT	TT	TT	TT	TT	TT	TT	TT	TT	TT	TT	TT	TT	TT	TT	TT	CC	TT	TT	CT	TT	TT	TT	TT	TT	TT	CC	CC	CT	CT	CC	TT	TT	TT	TT	TT	CC	TT	TT	TT	TT
SSL2.50ch01_2750628	G	T	TT	GG	TT	GG	TT	GG	GG	GG	GG	GG	GG	GG	GG	GG	GG	GG	GG	GG	GG	GG	GG	GG	TT	GG	GG	GT	GG	GG	GG	GG	GG	GG	TT	TT	GT	GT	TT	GG	GG	GG	GG	GG	TT	GG	GG	GG	GG
SSL2.50ch01_2750631	C	T	TT	CC	TT	CC	TT	CC	CC	CC	CC	CC	CC	CC	CC	CC	CC	CC	CC	CC	CC	CC	CC	CC	TT	CC	CC	CT	CC	CC	CC	CC	CC	CC	TT	TT	CT	CT	TT	CC	CC	CC	CC	CC	TT	CC	CC	CC	CC
SSL2.50ch01_2757551	T	C	TT	TT	TT	TT	TT	TT	TT	TT	TT	TT	TT	TT	TT	TT	TT	CC	TC	TT	TT	TT	TT	TT	TT	TT	TC	TT	TT	TT	TT	TT	TT	TT	TT	TT	TT	TT	TT	TT	TT	TT	CC	TT	TT	TT	TT	TT	TT
SSL2.50ch01_2757637	A	G	AA	GG	GG	AA	AA	AA	AA	AA	AA	AA	AA	AA	AA	AA	AA	AA	AG	GG	AA	AA	AA	AA	AA	AA	AA	AG	GG	AA	AA	AA	AA	AA	AA	AA	AA	GG	GG	AA	AG	AA	AA	AA	GG	GG	AA	GG	AA
SSL2.50ch01_2769196	C	A	AA	CC	CC	CC	CC	NN	CC	CC	CC	CC	CC	CC	CC	CC	CC	CC	NN	CC	CC	CC	CC	NN	CC	NN	CC	CC	CC	CC	CC	CC	CC	CC	AA	CC	CC	CC	CC	CC	CC	CC	CC	AA	AA	CC	CC	CC	CC
SSL2.50ch01_2773095	C	A	CC	CC	CC	CC	CC	AC	CC	CC	CC	CC	CC	CC	CC	CC	CC	CC	CC	CC	CC	CC	AA	CC	CC	CC	CC	CC	CC	CC	CC	CC	CC	CC	CC	CC	CC	CC	CC	CC	CC	CC	CC	AA	AA	CC	CC	CC	CC
SSL2.50ch01_2804692	C	T	CT	CT	CT	CT	CT	CT	CT	CT	CT	CT	CT	CT	CT	CT	CT	CT	CT	CT	CT	CT	CT	CT	CT	CT	CT	CT	CT	CT	CT	CT	CT	CT	CT	CT	CT	CT	CT	CT	CT	CT	CT	CT	CT	CT	CT	CT	CT
SSL2.50ch01_2818513	T	A	AA	TT	TT	TT	TT	TT	TT	TT	TT	TT	TT	TT	TT	TT	TT	TT	AT	AA	TT	NN	TT	NN	NN	TT	AA	TT	TT	TT	NN	TT	NN	TT	TT	TT	TT	AA	AA	TT	TT	TT	TT	TT	AA	TT	TT	TT	TT
SSL2.50ch01_2818514	A	C	CC	AA	AA	AA	AA	AA	AA	AA	AA	AA	AA	AA	AA	AA	AA	AA	AC	CC	AA	NN	AA	NN	NN	AA	CC	AA	AA	AA	NN	AA	NN	AA	AA	AA	AA	CC	CC	AA	AA	AA	AA	AA	CC	AA	AA	AA	AA
SSL2.50ch01_2844786	G	A	NN	GG	GG	GG	GG	GG	GG	AA	AA	GG	AA	GG	GG	GG	GG	GG	GG	GG	GG	GG	GG	GG	GG	GG	GG	GG	GG	GG	GG	GG	GG	GG	GG	GG	GG	GG	GG	GG	GG	GG	GG	GG	GG	GG	GG	GG	GG
SSL2.50ch01_2848260	C	A	CC	CC	CC	CC	CC	CC	CC	CC	CC	CC	CC	CC	CC	CC	CC	CC	CC	CC	CC	CC	CC	CC	CC	CC	CC	CC	CC	CC	CC	CC	CC	CC	CC	CC	CC	CC	CC	CC	CC	CC	CC	CC	CC	CC	CC	CC	CC
SSL2.50ch01_2848278	C	A	CC	AA	CC	CC	CC	CC	AA	CC	CC	CC	CC	CC	CC	CC	CA	AA	AA	AA	CC	AA	CC	AA	CC	CC	CA	CC	CC	CC	AA	AA	AA	AA	CC	CC	CC	CC	CC	CC	CC	CC	AA	CC	CC	CC	CC	CC	CC
SSL2.50ch01_2882303	T	G	TT	TT	TT	TT	TT	GG	TT	TT	TT	GT	TT	TT	TT	GG	GT	NN	TT	TT	TT	TT	GG	TT	GG	TT	TT	TT	TT	TT	TT	TT	TT	TT	TT	TT	TT	GT	TT	GG	GG	TT	TT	GG	TT	TT	TT	TT	TT
SSL2.50ch01_2886805	G	A	GG	GG	GG	GG	GG	AG	GG	AA	AA	AA	AA	GG	AA	AA	AG	GG	GG	GG	GG	GG	AA	GG	GG	GG	GG	GG	GG	AG	GG	GG	GG	AA	GG	GG	GG	GG	GG	GG	GG	GG	GG	GG	GG	GG	GG	GG	GG
SSL2.50ch01_2892849	C	T	CC	TT	CC	CC	TT	TT	CC	TT	TT	TT	TT	TT	TT	TT	TC	CC	CC	CC	CC	CC	TT	CC	TT	CC	CC	CC	CC	CC	CC	CC	CC	CC	CC	CC	CC	CC	CC	CC	CC	CC	CC	CC	CC	CC	CC	TT	CC
SSL2.50ch01_2893449	A	T	AA	AA	AA	AA	AA	AA	TT	AA	AA	AA	AA	AA	AA	AA	AA	AA	AT	AA	AA	AA	AA	AA	AA	AA	AA	AA	AA	AA	AA	AA	AA	AA	AA	AA	AA	AA	AA	AA	AA	AA	AA	AA	TT	AA	AA	AA	AA
SSL2.50ch01_2923781	A	T	TT	AA	TT	AA	TT	TT	AA	TT	TT	TT	TT	TT	TT	AA	TA	AA	AA	AA	TT	AA	TT	AA	AA	TT	AA	AA	AA	TA	AA	AA	AA	AA	TT	TT	TT	AA	AA	AA	AA	AA	AA	AA	AA	AA	AA	AA	TT
SSL2.50ch01_2923873	A	G	GG	AA	NN	AA	AA	AA	AA	NN	AA	AA	AA	AA	AA	NN	AA	AA	AA	AA	GG	NN	AA	NN	AA	GG	AA	AA	NN	AA	AA	AA	AA	AA	GG	NN	AG	AA	AA	AA	AA	AA	AA	AA	AA	AA	AA	AA	AA
SSL2.50ch01_2924746	T	A	TT	TT	TT	TT	AA	TT	TT	AA	AA	TT	AA	TT	TT	TT	TT	TT	TT	TT	TT	TT	TT	TT	TT	TT	TT	TT	TT	TT	TT	TT	TT	TT	TT	TT	TT	TT	TT	TT	TT	TT	TT	TT	TT	TT	TT	TT	TT
SSL2.50ch01_2983919	C	A	CC	CC	CC	CC	CC	AA	CC	CC	CC	AC	AA	CC	CC	CC	CC	CC	CC	CC	CC	CC	CC	CC	CC	CC	CC	CC	CC	AC	CC	CC	CC	CC	CC	CC	CC	CC	CC	NN	CC	CC	CC	CC	CC	CC	CC	CC	CC
SSL2.50ch01_2983951	C	T	CC	CC	CC	CC	CC	CC	CC	TT	TT	CC	CC	TT	TT	CC	CC	CC	CC	CC	CC	CC	CC	CC	CC	CC	CC	CC	CC	CC	CC	CC	CC	CC	CC	CC	CC	CC	CC	NN	CC	CC	CC	CC	CC	CC	CC	CC	CC
SSL2.50ch01_2986984	C	G	GG	CC	GG	CC	GG	CC	CC	CC	CC	CC	CC	CC	CC	CC	CC	GG	GG	GG	GG	CC	CC	CC	GC	GG	GC	GC	CC	CC	CC	CC	CC	CC	GG	GG	GC	GG	GG	GG	GG	GG	GG	GG	GG	GG	CC	GG	GG
SSL2.50ch01_2986988	T	A	AA	TT	AA	TT	AA	TT	TT	TT	TT	TT	TT	TT	TT	TT	TT	AA	AA	AA	AA	TT	TT	TT	TA	AA	TA	TA	TT	TT	TT	TT	TT	TT	AA	AA	TA	AA	AA	AA	AA	AA	AA	AA	AA	AA	TT	AA	AA
SSL2.50ch01_3006771	G	T	TT	TT	GG	TT	GG	GG	TT	TT	TT	GG	GG	GG	GG	GG	GG	TT	GG	GG	GG	GG	GG	GG	GG	GG	TT	TG	GG	TG	GG	TT	GG	TT	TT	GG	GG	GG	GG	GG	GG	GG	GG	GG	TT	TT	TT	TT	TT
SSL2.50ch01_3012063	T	C	TT	TT	TT	CC	TT	TT	TT	TT	TT	TT	TT	TT	TT	TT	TT	TT	TT	TT	TT	TT	TT	TT	TT	TT	TT	TT	TT	TT	TT	TT	TT	TT	TT	CC	TT	TC	TT	TT	NN	TT	TT	TT	CC	TT	TT	TT	CC
SSL2.50ch01_3012119	T	C	TT	TT	TT	TT	TT	TC	TT	CC	TT	TC	TT	TT	TT	CC	TC	TT	TT	TT	TT	TT	CC	TT	TT	TT	TT	TT	TT	TT	TT	TT	TT	TT	TT	TT	TT	TT	TT	TT	TT	TT	TT	TT	TT	TT	TT	TT	TT
SSL2.50ch01_3017174	G	A	GG	GG	GG	AA	GG	GG	GG	GG	GG	GG	GG	GG	GG	GG	GG	GG	GG	GG	GG	GG	GG	GG	GA	GG	GG	NN	AA	NN	GG	GG	GG	GG	GG	GG	GA	NN	GG	GG	GG	GG	GG	GG	GG	GG	GG	GG	GG
SSL2.50ch01_3031060	T	C	CC	TT	CC	TT	CC	TT	CC	TT	TT	TT	TT	TT	TT	TT	TT	TT	TT	TT	CC	TT	TT	TT	CT	CC	TT	CC	CC	TT	CC	TT	CC	TT	TT	CC	TT	CT	TT	TT	CT	TT	TT	TT	CC	TT	TT	TT	TT
SSL2.50ch01_3031117	A	C	AA	CC	AA	AA	AA	AC	AA	AA	AA	AA	AA	AA	AA	AA	AC	CC	AC	CC	AA	CC	AA	CC	AC	AA	AC	AA	AA	AC	AA	CC	AA	CC	CC	AA	AC	AA	AA	AA	AA	AA	AA	CC	AA	CC	AC	CC	CC
SSL2.50ch01_3044246	T	A	TT	AA	AA	TT	AA	TT	AA	TT	TT	TT	TT	TT	TT	TT	TT	TT	TT	TT	AA	TT	TT	TT	TA	AA	TT	TA	TT	TA	AA	TT	AA	TT	TT	TT	TA	NN	AA	AA	AA	TT	TT	AA	AA	TT	TT	TT	TT
SSL2.50ch01_3058784	C	T	TT	CC	CC	CC	CC	CC	CC	CC	CC	CC	CC	TT	CC	CC	CC	CC	CC	CC	CC	CC	CC	CC	CC	CC	CC	CC	CC	CC	CC	CC	CC	CC	CC	TT	CC	CC	CC	CC	CC	CC	CC	CC	CC	CC	CC	CC	CC
SSL2.50ch01_3093159	G	C	GG	GG	GG	GG	GG	NN	GG	CC	GG	GG	NN	NN	GG	CC	GC	GG	GG	GG	GG	GG	CC	GG	GG	NN	GG	GG	GG	NN	GG	GG	GG	GG	GG	GG	GG	GG	GG	GG	GG	GG	GG	GG	GG	GG	GC	GG	GG
SSL2.50ch01_3093226	A	G	AA	AA	AA	AA	AA	GG	AA	GG	GG	GG	GG	AA	GG	GG	AG	GG	AA	NN	AA	AA	GG	AA	AA	AA	AG	AG	AA	AG	AA	AA	AA	GG	GG	AA	AA	AA	AA	AA	AA	AA	GG	AA	AA	GG	GG	GG	GG
SSL2.50ch01_3105229	G	A	GG	GG	GG	GG	GG	GG	GG	GG	GG	GG	GG	GG	GG	GG	GA	GG	GG	GG	GG	GG	GG	GG	GG	GG	GG	GG	GG	GA	GG	AA	GG	AA	AA	GG	GG	GG	GG	GG	GG	GG	GG	GG	GG	AA	AA	AA	GG
SSL2.50ch01_3105240	C	A	CC	CC	CC	CC	CC	CA	CC	AA	AA	AA	AA	AA	AA	AA	CA	CC	CC	CC	CC	CC	AA	CC	CC	CC	CC	CA	CC	CC	CC	CC	CC	CC	CC	CC	CC	CC	CC	CC	CC	CC	CC	CC	CC	CC	CC	CC	CC
SSL2.50ch01_3167014	T	A	TT	TT	TT	TT	TT	TT	TT	TT	TT	TT	TT	TT	TT	TT	TA	TT	TT	TT	TT	TT	TA	TT	TT	NN	TT	TT	TT	TT	TT	TT	TT	TT	TT	TT	TT	TA	TT	TT	TT	TA	TT	TA	TT	TT	TT	TT	TT
SSL2.50ch01_3232322	C	A	CC	CC	CC	CC	CC	CC	CC	CC	CC	CC	CC	CC	CC	CC	CC	AA	CA	CC	CC	CC	CC	CC	CC	CC	CA	CC	CC	CC	CC	CC	CC	AA	CC	CC	CC	CC	CC	CC	CC	CC	AA	CC	CC	CC	CC	CC	CC
SSL2.50ch01_3233135	C	T	CC	CC	CC	CC	CC	CT	CC	TT	TT	TT	TT	CC	TT	TT	TT	CC	CC	CC	CC	CC	TT	CC	CT	CC	CC	CC	CC	CC	CC	CC	CC	CC	CC	CC	CC	CC	CC	CC	CC	CC	CC	CC	CC	CC	CC	CC	CC
SSL2.50ch01_3233173	T	G	TT	TT	TT	TT	TT	TT	TT	GG	GG	GT	GG	TT	GG	TT	TT	TT	TT	TT	TT	TT	TT	TT	GT	TT	TT	TT	TT	TT	TT	TT	TT	TT	TT	TT	TT	TT	TT	TT	TT	TT	TT	TT	TT	TT	TT	TT	TT
SSL2.50ch01_3240692	A	G	AA	AA	AA	NN	AA	NN	AA	AA	AA	AA	NN	AA	AA	AA	NN	GG	GG	AA	AA	AA	AA	NN	AA	AA	GA	NN	AA	GA	AA	AA	AA	GG	AA	AA	NN	NN	AA	AA	AA	AA	GG	AA	AA	AA	AA	AA	AA
SSL2.50ch01_3240700	G	A	GG	GG	GG	NN	GG	NN	GG	GG	GG	GG	NN	GG	GG	GG	NN	AA	AA	GG	GG	GG	GG	NN	GG	GG	AA	NN	GG	GA	GG	GG	GG	AA	GG	GG	NN	NN	GG	GG	GG	GG	AA	GG	GG	GG	GG	GG	GG
SSL2.50ch01_3240729	G	A	GG	GG	GG	NN	GG	NN	GG	GG	GG	GG	NN	GG	GG	GG	NN	AA	AA	GG	GG	GG	GG	NN	GG	GG	GA	NN	GG	GA	GG	GG	GG	AA	GG	GG	NN	NN	GG	GG	GG	GG	AA	GG	GG	GG	GG	GG	GG
SSL2.50ch01_3240841	G	A	GG	GG	GG	GG	GG	GG	GG	GG	GG	GG	GG	GG	GG	GG	GG	AA	AG	GG	GG	GG	GG	GG	GG	GG	AG	GG	GG	AG	GG	GG	GG	AA	GG	GG	GG	GG	GG	GG	GG	GG	AA	GG	GG	GG	GG	GG	GG
SSL2.50ch01_3255235	C	T	CC	CC	CC	CC	CC	TC	CC	TT	CC	TC	CC	TT	CC	TT	TC	CC	CC	CC	CC	CC	TT	CC	CC	CC	CC	CC	CC	CC	CC	CC	CC	CC	CC	CC	CC	CC	CC	CC	CC	CC	CC	CC	CC	CC	CC	CC	CC
SSL2.50ch01_3270464	T	C	TT	TT	TT	TT	TT	TC	TT	TT	CC	TC	TT	TT	TT	CC	TC	TT	TT	TT	TT	TT	CC	TT	TT	TT	TT	TT	TT	TT	TT	TT	TT	TT	TT	TT	TT	TT	TT	TT	TT	TT	TT	TT	TT	TT	TT	TT	TT
SSL2.50ch01_3303866	G	A	AA	GG	GG	AA	GG	GG	GG	GG	GG	GG	GG	GG	GG	GG	GG	GG	GG	GG	GG	GG	GG	GG	GG	GG	GG	GA	GG	NN	GG	GG	GG	GG	GG	GG	GG	GG	GG	GG	GG	GG	GG	AA	GG	GG	GG	AA	GG
SSL2.50ch01_3303936	T	G	TT	TT	TT	TT	GG	TG	TT	GG	TT	TG	GG	GG	GG	GG	TG	TT	TT	TT	TT	TT	GG	TT	TT	TT	TT	TT	TT	TT	TT	TT	TT	TT	TT	TT	TT	TT	TT	TT	TT	TT	TT	TT	TT	TT	TT	TT	TT
SSL2.50ch01_3309775	C	A	CC	CC	NN	CC	NN	AC	CC	AA	CC	AC	AA	AA	AA	AA	AC	CC	CC	CC	CC	CC	AA	CC	NN	NN	CC	NN	CC	NN	NN	CC	CC	CC	CC	NN	CC	NN	CC	CC	CC	CC	CC	NN	CC	CC	CC	CC	CC
SSL2.50ch01_3313606	G	A	GG	GG	GG	GG	GG	AA	GG	AA	GG	GG	AA	AA	AA	AA	AG	GG	GG	GG	GG	GG	AA	GG	GG	GG	GG	GG	GG	GG	GG	GG	GG	GG	GG	GG	GG	GG	GG	GG	GG	GG	GG	GG	GG	GG	GG	GG	GG
SSL2.50ch01_3318486	C	T	CC	CC	CC	CC	CC	CC	CC	CC	CC	CC	CC	CC	CC	CC	CC	TT	CC	CC	CC	CC	CC	TT	CC	CC	CC	CC	CC	CC	TT	CC	TT	CC	CC	CC	CC	TC	TT	CC	CC	CC	CC	CC	CC	CC	CC	CC	CC
SSL2.50ch01_3324767	G	A	GG	GG	GG	GG	GG	GA	GG	AA	AA	AA	GG	AA	AA	AA	GA	GG	GG	GG	GG	GG	AA	GG	GA	GG	GG	GG	GG	GG	GG	GG	GG	GG	GG	GG	GG	GG	GG	GG	GG	GG	GG	GG	GG	GG	GG	GG	GG
SSL2.50ch01_3328137	T	G	TT	TT	TT	TT	TT	TT	TT	GG	NN	GG	TT	GG	GG	NN	TT	TT	TT	TT	TT	TT	GG	TT	TT	TT	TT	TT	TT	TT	TT	TT	TT	TT	TT	TT	TT	TT	TT	TT	TT	TT	TT	TT	TT	TT	TT	TT	TT
SSL2.50ch01_3328151	T	C	TT	TT	TT	TT	TT	TT	TT	CC	NN	CC	TT	CC	CC	NN	TT	TT	TT	TT	TT	TT	CC	TT	TT	TT	TT	TT	TT	TT	TT	TT	TT	TT	TT	TT	TT	TT	TT	TT	TT	TT	TT	TT	TT	TT	TT	TT	TT
SSL2.50ch01_3328257	T	G	TT	TT	TT	TT	TT	GT	TT	GG	GG	GG	TT	GG	GG	GG	GT	TT	TT	TT	TT	TT	GG	TT	GT	TT	TT	TT	TT	TT	TT	TT	TT	TT	TT	TT	TT	TT	TT	TT	TT	TT	TT	TT	TT	TT	TT	TT	TT
SSL2.50ch01_3328296	C	T	CC	CC	CC	CC	CC	CT	CC	TT	TT	TT	CC	TT	TT	TT	CT	CC	CC	CC	CC	CC	TT	CC	CT	CC	CC	CC	CC	CC	CC	CC	CC	CC	CC	CC	CC	CC	CC	CC	CC	CC	CC	CC	CC	CC	CC	CC	CC
SSL2.50ch01_3333199	T	C	TT	TT	TT	TT	TT	CC	TT	CC	CC	CC	TT	CC	CC	CC	TC	TT	CC	CC	CC	TT	CC	NN	CC	CC	TT	TT	CC	TT	CC	TT	CC	TT	TT	CC	CC	TT	TT	TT	TC	TT	CC	TT	TT	TT	TT	TT	TT
SSL2.50ch01_3333210	G	T	GG	GG	GG	GG	GG	GG	GG	TT	TT	TT	GG	TT	TT	TT	TG	GG	GG	GG	GG	GG	TT	GG	TG	GG	GG	GG	GG	GG	GG	GG	GG	GG	GG	GG	GG	GG	GG	GG	GG	GG	GG	GG	GG	GG	GG	GG	GG
SSL2.50ch01_3333228	G	A	GG	GG	GG	GG	GG	GG	GG	AA	AA	AA	GG	AA	AA	AA	GA	GG	GG	GG	GG	GG	AA	GG	GA	GG	GG	GG	GG	GG	GG	GG	GG	GG	GG	GG	GG	GG	GG	GG	GG	GG	GG	GG	GG	GG	GG	GG	GG
SSL2.50ch01_3333272	A	T	AA	AA	AA	AA	AA	AA	AA	TT	TT	TT	AA	TT	TT	TT	TA	AA	AA	AA	AA	AA	TT	AA	TA	AA	AA	AA	AA	AA	AA	AA	AA	AA	AA	AA	AA	AA	AA	AA	AA	AA	AA	AA	AA	AA	AA	AA	AA
SSL2.50ch01_3333275	A	G	AA	AA	AA	AA	AA	AA	AA	GG	GG	GG	AA	GG	GG	GG	GA	AA	AA	AA	AA	AA	GG	AA	GA	AA	AA	AA	AA	AA	AA	AA	AA	AA	AA	AA	AA	AA	AA	AA	AA	AA	AA	AA	AA	AA	AA	AA	AA
SSL2.50ch01_3333306	T	A	TT	TT	TT	TT	TT	TT	TT	TT	TT	AT	TT	AA	TT	TT	TT	TT	TT	TT	TT	TT	TT	TT	TT	TT	TT	TT	TT	TT	TT	TT	TT	TT	TT	TT	TT	TT	TT	TT	TT	TT	TT	TT	TT	TT	TT	TT	TT
SSL2.50ch01_3333309	T	A	TT	TT	TT	TT	TT	AA	TT	AA	AA	AA	TT	AA	AA	AA	AT	TT	TT	TT	TT	TT	AA	TT	AT	TT	TT	TT	TT	TT	TT	TT	TT	TT	TT	TT	TT	TT	TT	TT	TT	TT	TT	TT	TT	TT	TT	TT	TT
SSL2.50ch01_3486876	G	A	GG	GG	GG	GG	GG	GA	GG	GG	GG	GA	GG	GG	AA	AA	GA	GG	GG	GG	GG	GG	AA	GG	GG	GG	GG	GG	GG	GG	GG	GG	GG	GG	GG	GG	GG	GG	GG	GG	GG	GG	GG	GG	GG	GG	GG	GG	GG
SSL2.50ch01_3486957	T	C	TT	TT	TT	TT	TT	TT	TT	TT	TT	TT	TT	TT	TT	TT	TT	CC	CT	TT	TT	TT	TT	TT	TT	TT	TT	TT	TT	TT	TT	TT	TT	TT	TT	TT	TT	TT	TT	TT	TT	TT	CC	TT	TT	TT	TT	TT	TT
SSL2.50ch01_3489079	T	G	TT	TT	TT	TT	TT	GG	TT	TT	NN	GT	TT	TT	GG	GG	GT	TT	TT	NN	TT	NN	GG	TT	TT	TT	TT	TT	TT	TT	TT	TT	TT	TT	TT	TT	TT	TT	TT	NN	TT	TT	TT	TT	TT	TT	TT	TT	TT
SSL2.50ch01_3490368	T	C	TT	TT	TT	TT	TT	NN	TT	TT	TT	TT	TT	TT	TT	TT	TT	CC	NN	TT	TT	NN	TT	TT	TT	TT	TT	TT	NN	TT	TT	TT	TT	TT	TT	TT	NN	TT	TT	NN	TT	TT	CC	TT	TT	TT	TT	TT	TT
SSL2.50ch01_3490439	C	T	CC	CC	CC	CC	CC	CC	CC	CC	CC	CT	CC	CC	TT	TT	CT	CC	CC	CC	CC	CC	TT	CC	CC	CC	CC	CC	CC	CC	CC	CC	CC	CC	CC	CC	CC	CC	CC	CC	CC	CC	CC	CC	CC	CC	CC	CC	CC
SSL2.50ch01_3587020	G	C	CC	GG	GG	GG	GG	GG	GG	GG	NN	GG	GG	GG	GG	GG	GG	GG	GG	GG	GG	GG	GG	GG	CG	GG	GG	GG	GG	GG	GG	GG	GG	GG	GG	GG	GG	CG	GG	GG	GG	CC	GG	GG	GG	GG	GG	GG	GG
SSL2.50ch01_3681012	T	C	TT	TT	TT	TT	TT	TT	CC	CC	CC	TT	TT	TT	TT	TT	TT	TT	TT	TT	TT	CC	TT	TT	TT	TT	TT	TT	TT	TT	TT	TT	TT	TT	TT	TT	TT	TT	TT	TT	TT	TT	TT	TT	TT	TT	TT	TT	TT
SSL2.50ch01_3695270	G	A	GG	GG	GG	GG	GG	GA	GG	AA	AA	GA	GG	AA	GG	GG	GA	GG	GG	GG	GG	GG	AA	GG	GG	GG	GG	GG	GG	GG	GG	GG	GG	GG	GG	GG	GG	GG	GG	GG	GG	GG	GG	GG	GG	GG	GG	GG	GG
SSL2.50ch01_3695381	G	A	GG	GG	GG	GG	GG	AG	GG	AA	AA	AG	GG	AA	GG	GG	AG	GG	GG	GG	GG	GG	AA	GG	GG	GG	GG	GG	GG	GG	GG	GG	GG	GG	GG	GG	GG	GG	GG	GG	GG	GG	GG	GG	GG	GG	GG	GG	GG
SSL2.50ch01_3695384	G	A	GG	GG	GG	GG	GG	AG	GG	AA	AA	AG	GG	AA	GG	GG	AG	GG	GG	GG	GG	GG	AA	GG	GG	GG	GG	GG	GG	GG	GG	GG	GG	GG	GG	GG	GG	GG	GG	GG	GG	GG	GG	GG	GG	GG	GG	GG	GG
SSL2.50ch01_3695396	A	G	AA	AA	AA	AA	AA	AG	AA	GG	GG	AG	AA	GG	AA	AA	AG	AA	AA	AA	AA	AA	GG	AA	AA	AA	AA	AA	AA	AA	AA	AA	AA	AA	AA	AA	AA	AA	AA	AA	AA	AA	AA	AA	AA	AA	AA	AA	AA
SSL2.50ch01_3706275	A	T	AA	AA	AA	AA	AA	AA	AA	AA	AA	AA	AA	AA	AA	AA	AA	TT	TA	AA	AA	AA	AA	AA	AA	AA	AA	AA	AA	AA	AA	AA	AA	AA	AA	AA	AA	AA	AA	AA	AA	AA	TT	AA	AA	AA	AA	AA	AA
SSL2.50ch01_3706300	T	A	TT	TT	TT	TT	TT	TT	TT	TT	TT	AT	TT	TT	TT	TT	AA	TT	TT	TT	TT	TT	TT	TT	TT	TT	NN	TT	TT	TT	TT	TT	TT	TT	TT	TT	TT	TT	TT	TT	TT	TT	TT	TT	TT	TT	TT	TT	TT
SSL2.50ch01_3706301	T	A	TT	AA	TT	TT	TT	TT	TT	TT	TT	TT	TT	TT	TT	AA	TT	TT	AT	AA	TT	TT	TT	TT	TT	TT	NN	TT	TT	AT	TT	TT	TT	TT	TT	TT	TT	TT	TT	TT	TT	TT	TT	TT	TT	AA	AA	AT	TT
SSL2.50ch01_3706311	A	T	AA	AA	AA	AA	AA	AT	AA	AA	AA	AA	AA	AA	AA	AA	AA	AA	AT	AA	AA	AA	AA	AA	AA	AA	NN	AA	AA	AA	AA	AA	AA	AA	AA	AA	AA	AA	AA	AA	AA	AA	TT	AA	AA	AA	AA	AA	AA
SSL2.50ch01_3740482	G	A	GG	AA	GG	GG	GG	GG	GG	GG	GG	GG	GG	GG	GG	GG	GG	GG	GG	GG	GG	AA	GG	AA	GA	GG	GG	GA	GG	GA	GG	GG	GG	AA	AA	GG	GG	GG	GG	GG	GG	GG	GG	GG	GG	AA	AA	AA	GG
SSL2.50ch01_3910246	T	C	CC	CC	TT	NN	TT	CC	CC	TT	TT	CC	CC	CC	TT	CC	CT	TT	CT	CC	CC	TT	CC	TT	TT	NN	TT	CT	TT	TT	TT	TT	TT	TT	TT	CC	CC	CC	CC	CC	CT	TT	TT	CC	CC	TT	TT	CT	CC
SSL2.50ch01_3911787	T	A	TT	TT	AA	TT	AA	NN	TT	TT	TT	TT	TT	TT	TT	TT	TA	AA	AA	TT	TT	AA	TT	AA	TA	TT	AA	TA	AA	AA	AA	AA	AA	AA	AA	TT	TT	TA	TT	TT	TA	AA	AA	TT	TT	AA	AA	TA	TT
SSL2.50ch01_3911788	A	T	AA	AA	TT	AA	TT	NN	AA	AA	AA	AA	AA	AA	AA	AA	TA	TT	TT	AA	AA	TT	AA	TT	TA	AA	TT	TA	TT	TT	TT	TT	TT	TT	TT	AA	AA	TA	AA	AA	TA	TT	TT	AA	AA	TT	TT	TA	AA
SSL2.50ch01_3911881	T	A	TT	TT	AA	TT	AA	TT	TT	TT	TT	TT	TT	TT	TT	TT	AT	TT	TT	TT	TT	AA	TT	AA	TT	TT	AT	AT	AA	AA	AA	AA	AA	AA	AA	TT	TT	AT	TT	TT	AT	AA	TT	TT	TT	AA	AA	AT	TT
SSL2.50ch01_3976054	G	T	TG	TG	NN	GG	TG	TG	GG	TT	TG	TG	GG	TT	TT	GG	GG	TG	TG	TG	TG	GG	GG	GG	TG	TG	GG	TG	TG	TG	TG	GG	TG	GG	GG	GG	GG	TG	GG	GG	TG	TG	TG	GG	TG	GG	GG	GG	TG
SSL2.50ch01_4122742	G	A	GG	GG	GG	GG	GG	GG	GG	GG	GG	GG	GG	GG	GG	GG	GG	GG	GG	GG	GG	AA	GG	GG	GG	GG	GA	GG	GG	GG	GG	AA	GG	GG	GG	GG	GG	GG	GG	GG	GG	GG	GG	GG	GG	GG	GG	GG	GG
SSL2.50ch01_4122857	G	A	GG	GG	GG	GG	GG	AG	GG	GG	AA	AG	GG	AA	GG	GG	AG	GG	GG	GG	GG	GG	AA	GG	GG	GG	GG	GG	GG	AG	GG	GG	GG	GG	GG	GG	GG	GG	GG	GG	GG	GG	GG	GG	GG	GG	GG	GG	GG
SSL2.50ch01_4156546	A	G	AA	AA	AA	AA	AA	AA	AA	AA	NN	AA	AA	AA	AA	AA	AA	GG	AG	AA	AA	AA	AA	AA	AA	AA	AA	NN	AA	AA	AA	AA	AA	AA	AA	AA	AA	AA	AA	AA	AA	AA	GG	AA	AA	AA	AA	AA	AA
SSL2.50ch01_4156553	A	T	AA	AA	AA	AA	AA	AA	AA	AA	NN	AA	AA	AA	AA	TT	AA	AA	AA	AA	AA	AA	AA	AA	AA	AA	AA	NN	AA	AA	AA	AA	AA	AA	TT	AA	AA	AA	AA	AA	AA	AA	AA	AA	AA	AA	AA	TT	TT
SSL2.50ch01_4263320	G	C	GG	GG	GG	GG	GG	GC	GG	GG	CC	GG	GG	CC	CC	GG	GG	GG	GG	GG	GG	GG	GG	GG	GG	GG	GG	GG	GG	GG	GG	GG	GG	GG	GG	GG	GG	GG	GG	GG	GG	GG	GG	GG	GG	GG	GG	GG	GG
SSL2.50ch01_4375974	C	T	CC	TT	CC	CC	CC	CC	TT	CC	CC	CC	CC	CC	CC	CC	CC	CC	CT	TT	CC	TT	CC	TT	CC	CC	CT	CC	CC	CC	CC	TT	CC	TT	CC	TT	CC	CT	CC	CC	CC	CC	CC	CC	CC	CC	CC	CT	CC
SSL2.50ch01_4490558	A	G	AA	AA	AA	AA	AA	AA	AA	AA	AA	AA	AA	AA	AA	AA	AA	AA	AA	AA	AA	AA	AA	AA	AA	AA	AA	AA	AA	AA	AA	AA	AA	AA	AA	AA	AA	AA	AA	AA	AA	AA	AA	AA	AA	AA	AA	AA	AA
SSL2.50ch01_4490691	A	G	AA	AA	NN	AA	AA	AA	GG	AA	AA	AA	AA	AA	AA	AA	AG	AA	AA	AA	AA	AA	AA	GG	AA	AA	AA	GG	AA	AA	GG	GG	GG	GG	GG	AA	AA	AG	AA	AA	AG	AA	AA	AA	AA	GG	GG	AG	GG
SSL2.50ch01_4492666	A	T	TT	AA	AA	TT	AA	AA	AA	AA	NN	AA	AA	AA	AA	AA	AA	AA	NN	TT	AA	AA	AA	AA	AA	TT	AA	AA	AA	TA	AA	AA	AA	AA	AA	AA	TT	AA	AA	AA	AA	AA	AA	AA	AA	AA	AA	AA	AA
SSL2.50ch01_4492708	G	A	GG	AA	GG	GG	GG	GA	GG	AA	NN	AA	GG	GG	GG	AA	GA	GG	GG	GG	AA	GG	AA	GG	GG	GG	GG	GG	GG	GG	GG	GG	GG	GG	GG	AA	GG	GG	GG	GG	GG	GG	GG	GG	GG	GG	GG	GG	GG
SSL2.50ch01_4505056	G	A	GG	GG	GG	AA	GG	GG	AA	NN	NN	GG	GG	GG	GG	GG	GG	GG	GA	AA	GG	GG	GG	GG	GA	GG	GG	GG	GG	GA	GG	GG	GG	GG	GG	GG	AA	GG	GG	GG	GA	GG	GG	GG	GG	GG	GG	GG	GG
SSL2.50ch01_4505081	T	C	TT	TT	TT	CC	CC	TC	TT	NN	NN	TT	TT	CC	CC	TT	TT	TT	TC	CC	TT	TT	TT	TT	CC	TT	TT	TT	TT	TC	TT	TT	TT	TT	TT	TT	CC	TT	TT	TT	TC	CC	TT	TT	CC	TT	TT	TT	TT
SSL2.50ch01_4505091	G	A	GG	GG	GG	GG	GG	GG	GG	NN	NN	GG	GG	GG	GG	GG	GG	GG	GG	GG	GG	GG	GG	GG	GG	GG	GG	GG	GG	GG	GG	GG	GG	GG	GG	GG	GG	GG	GG	GG	GG	GG	GG	GG	AA	GG	GG	GG	GG
SSL2.50ch01_4505197	G	A	GG	AA	GG	GG	GG	AG	GG	NN	NN	GG	AA	GG	GG	GG	GG	GG	GG	GG	GG	GG	GG	GG	GG	GG	GG	GG	GG	GG	GG	GG	GG	GG	GG	GG	GG	GG	GG	GG	GG	GG	GG	GG	GG	GG	GG	GG	GG
SSL2.50ch01_4540760	C	T	TT	TT	CC	TT	CC	TC	CC	TT	TT	CC	CC	CC	CC	CC	CC	CC	TC	TT	CC	CC	CC	CC	TC	TT	TC	CC	TT	CC	CC	CC	CC	CC	CC	CC	CC	TT	TT	TT	CC	CC	CC	TT	TT	CC	CC	CC	TT
SSL2.50ch01_4540826	C	G	GG	GG	CC	GG	CC	GC	CC	CC	CC	CC	CC	CC	CC	CC	CC	CC	GC	GG	CC	CC	CC	CC	GC	GG	GC	CC	GG	CC	CC	CC	CC	CC	CC	CC	CC	GG	GG	GG	CC	CC	CC	GG	GG	CC	CC	CC	GG
SSL2.50ch01_4573356	G	A	AA	AA	AA	GG	AA	GG	AA	GG	GG	GG	GG	GG	GG	GG	AG	GG	GG	GG	GG	GG	GG	AA	AG	GG	AG	AA	AA	AA	AA	AA	AA	AA	AA	AA	GG	AG	GG	AA	AG	AA	GG	GG	GG	AA	AA	AA	GG
SSL2.50ch01_4684970	C	T	CC	CC	CC	CC	CC	TC	CC	TT	TT	TT	TT	TT	TT	TT	TC	CC	CC	CC	CC	CC	TT	CC	CC	CC	CC	CC	CC	CC	CC	CC	CC	CC	CC	CC	CC	CC	TT	TT	CC	CC	CC	CC	CC	CC	CC	CC	CC
SSL2.50ch01_4684988	C	T	CC	CC	CC	CC	CC	TC	CC	CC	CC	TT	TT	TT	TT	TT	CC	CC	CC	CC	CC	CC	TT	CC	CC	CC	CC	CC	CC	CC	CC	CC	CC	CC	CC	CC	CC	CC	TT	TT	CC	CC	CC	CC	CC	CC	CC	CC	CC
SSL2.50ch01_4685001	G	A	AA	GG	AA	AA	AA	GG	AA	GG	GG	GG	GG	GG	GG	GG	GG	GG	GG	GG	AA	AA	GG	GG	AA	AA	GA	AA	AA	AA	GG	AA	GG	GG	AA	AA	AA	AA	GG	GG	GA	GG	AA	AA	AA	AA	AA	GA	AA
SSL2.50ch01_4686811	C	T	CC	CC	CC	NN	CC	NN	CC	TT	TT	TT	TT	TT	TT	TT	NN	CC	CC	CC	CC	CC	TT	CC	CC	CC	CC	CC	CC	CC	CC	CC	CC	CC	CC	CC	CC	CC	TT	TT	CC	CC	CC	CC	CC	CC	CC	CC	CC
SSL2.50ch01_4870602	A	G	AA	AA	AA	AA	GG	NN	AA	AA	NN	AA	AA	AA	AA	AA	AA	AA	AA	NN	AA	GG	AA	AA	AA	AA	NN	NN	GG	NN	NN	GG	AA	AA	AA	AA	AA	AA	AA	AA	AA	AA	AA	AA	AA	AA	AA	AA	NN
SSL2.50ch01_4959237	A	G	GA	GG	GA	NN	AA	NN	AA	GG	AA	GG	GA	NN	NN	NN	AA	AA	GA	NN	AA	AA	GG	AA	AA	NN	GA	AA	NN	GA	AA	AA	NN	GA	NN	GA	AA	AA	AA	AA	GA	AA	AA	GA	NN	NN	AA	AA	GG
SSL2.50ch01_4959256	C	T	CC	CC	CC	CC	CC	NN	CC	TT	CC	TT	CC	NN	NN	NN	CC	CC	CC	NN	CC	CC	TT	CC	CC	CC	CC	CC	NN	CC	CC	CC	CC	CC	NN	CC	CC	CC	CC	CC	CC	CC	CC	NN	NN	NN	CC	CC	TT
SSL2.50ch01_5087115	C	A	CC	CC	AA	CC	AA	CC	AA	CC	CC	CC	CC	CC	CC	CC	CC	AA	CC	CC	CC	CC	CC	CC	CC	CC	CC	CC	CC	CA	CC	CC	CC	CC	AA	CC	CC	CC	CC	CC	CC	CC	AA	CC	CC	CC	AA	CA	AA
SSL2.50ch01_5195744	A	G	AA	GG	AA	AA	AA	AA	AA	AA	AA	AA	AA	AA	AA	GG	AA	GG	AA	AA	AA	AA	AA	AA	AA	AA	AA	AA	AA	AA	AA	AA	AA	AA	AA	AA	AA	AA	AA	GG	AA	AA	AA	AA	AA	AA	AA	GA	AA
SSL2.50ch01_5195749	G	C	CC	CC	CC	GG	CC	GC	GG	CC	CC	GC	GG	CC	CC	CC	CC	CC	GG	GG	GG	CC	CC	CC	GG	GG	GC	GG	CC	GG	CC	GG	CC	CC	GG	GG	GC	CC	CC	CC	CC	GG	CC	GG	GG	CC	GG	GC	GG
SSL2.50ch01_5197135	T	A	AA	AA	AA	TT	AA	TT	TT	TT	TT	TT	TT	TT	TT	NN	AT	AA	TT	TT	TT	AA	TT	AA	TT	TT	AT	TT	AA	TT	AA	TT	AA	AA	TT	TT	AA	AA	AA	AA	AA	TT	AA	TT	TT	AA	TT	AT	TT
SSL2.50ch01_5342744	T	C	TT	TT	TT	TT	TT	TC	TT	CC	CC	TC	TT	CC	CC	CC	TC	TT	TT	TT	TT	TT	CC	TT	TT	TT	TT	TT	TT	TT	TT	TT	TT	TT	TT	TT	TT	TT	TT	TT	TT	TT	TT	TT	TT	TT	TT	TT	TT
SSL2.50ch01_5342793	C	G	GG	GG	CC	CC	CC	CC	CC	CC	CC	CC	CC	CC	CC	CC	GC	CC	GG	CC	GG	GG	CC	GG	CC	CC	GC	CC	GG	CC	GG	GG	GG	GG	CC	CC	CC	CC	CC	CC	CC	CC	CC	GG	CC	CC	CC	CC	GG
SSL2.50ch01_5508070	A	G	GG	AA	GG	GG	GG	GG	AA	GG	GG	GG	GG	GG	GG	AA	GA	AA	GA	GG	AA	AA	GG	AA	GG	NN	AA	GG	AA	GA	GG	AA	GG	AA	AA	AA	AA	AA	AA	AA	AA	AA	AA	AA	AA	AA	AA	GG	AA
SSL2.50ch01_5516529	G	A	GG	GG	GG	GG	AA	AA	GG	AA	AA	AA	AA	AA	AA	AA	AA	AA	GG	GG	GG	AA	AA	AA	AA	GG	AG	AA	GG	GG	GG	AA	GG	AA	AA	GG	GG	GG	GG	GG	GG	GG	AA	GG	GG	GG	GG	GG	GG
SSL2.50ch01_5536766	C	A	CC	CC	CC	CC	CC	AA	CC	CC	CC	CA	AA	AA	CC	AA	CA	AA	CC	CC	CC	AA	AA	AA	CC	CC	CC	CC	CC	CC	AA	AA	AA	AA	CC	CC	CC	CC	CC	CC	CC	CC	AA	CC	CC	CC	CC	CC	CC
SSL2.50ch01_5536839	T	C	TT	TT	TT	TT	TT	CC	TT	TT	TT	CT	CC	CC	TT	CC	CT	CC	TT	TT	TT	CC	CC	CC	CC	TT	CT	TT	TT	TT	CC	CC	CC	CC	TT	TT	TT	TT	TT	TT	TT	TT	CC	TT	TT	TT	TT	TT	TT
SSL2.50ch01_5536850	C	G	CC	CC	CC	CC	CC	GG	CC	CC	CC	CG	GG	GG	CC	GG	CG	GG	CC	CC	CC	GG	GG	GG	GG	CC	CG	CC	CC	CC	GG	GG	GG	GG	CC	CC	CC	CC	CC	CC	CC	CC	GG	CC	CC	CC	CC	CC	CC
SSL2.50ch01_5542283	G	A	GG	GG	GG	GG	GG	AA	GG	GG	NN	AG	GG	GG	GG	GG	GG	GG	GG	GG	GG	GG	GG	GG	GG	GG	GG	GG	NN	GG	GG	GG	GG	NN	GG	GG	GG	GG	GG	GG	GG	GG	GG	GG	GG	GG	GG	GG	GG
SSL2.50ch01_5543931	A	C	AA	AA	AA	AA	AA	CC	AA	CC	CC	CC	CC	CC	CC	CC	CC	CC	AA	AA	AA	CC	CC	CC	CC	AA	NN	CC	AA	CA	CC	CC	CC	CC	AA	AA	AA	AA	AA	AA	AA	AA	CC	AA	AA	CC	AA	CC	AA
SSL2.50ch01_5543970	A	G	AA	AA	AA	AA	AA	GG	AA	GG	GG	GG	GG	GG	GG	GG	GG	GG	AA	AA	AA	GG	GG	GG	GG	AA	NN	GG	AA	GA	GG	GG	GG	GG	AA	AA	AA	AA	AA	AA	AA	AA	GG	AA	AA	GG	AA	GG	AA
SSL2.50ch01_5544009	C	A	CC	CC	CC	CC	CC	AA	CC	AA	AA	AA	AA	AA	AA	AA	AA	AA	CC	CC	CC	AA	AA	AA	AA	CC	AC	AA	CC	AC	AA	AA	AA	AA	CC	CC	CC	CC	CC	CC	CC	CC	AA	CC	CC	AA	CC	AA	CC
SSL2.50ch01_5544010	G	T	GG	GG	GG	GG	GG	TT	GG	TT	TT	TT	TT	TT	TT	TT	TT	TT	GG	GG	GG	TT	TT	TT	TT	GG	GT	TT	GG	GT	TT	TT	TT	TT	GG	GG	GG	GG	GG	GG	GG	GG	TT	GG	GG	TT	GG	TT	GG
SSL2.50ch01_5544021	T	A	TT	TT	TT	TT	TT	AA	TT	AA	AA	AA	AA	AA	AA	AA	AA	AA	TT	TT	TT	AA	AA	AA	AA	TT	AT	AA	TT	AT	AA	AA	AA	AA	TT	TT	TT	TT	TT	TT	TT	TT	AA	TT	TT	AA	TT	AA	TT
SSL2.50ch01_5544061	G	T	GG	GG	GG	GG	GG	TT	GG	TT	TT	TT	TT	TT	TT	TT	TT	TT	GG	GG	GG	TT	TT	TT	TT	GG	GT	TT	GG	GT	TT	TT	TT	TT	GG	GG	GG	GG	GG	GG	GG	GG	TT	GG	GG	TT	GG	TT	GG
SSL2.50ch01_5600344	T	C	TT	TT	TT	CC	TT	CC	CC	CC	CC	CC	CC	CC	TT	CC	CC	CC	TC	CC	TT	CC	TT	CC	CC	CC	TT	CC	TT	TT	CC	TT	CC	CC	TT	TT	TT	TT	TT	TT	TC	TT	CC	TT	TT	CC	TT	TT	TT
SSL2.50ch01_5600484	A	G	AA	AA	AA	GG	AA	AG	GG	AA	AA	GG	GG	AA	AA	GG	GG	AA	AG	GG	AA	AA	GG	AA	GG	GG	AA	GG	AA	AA	GG	AA	GG	AA	AA	AA	AA	AA	AA	AA	AG	AA	AA	AA	AA	GG	AA	AA	AA
SSL2.50ch01_5615088	C	A	AC	AC	CC	CC	AC	AC	AC	AC	CC	CC	AC	CC	AC	CC	AC	AC	CC	CC	CC	CC	CC	CC	CC	CC	AC	AC	CC	AC	AC	CC	AC	CC	AC	AC	AC	CC	CC	NN	NN	AC	AC	CC	AC	CC	AC	CC	CC
SSL2.50ch01_5615105	G	A	GG	GG	GG	AG	GG	GG	AG	GG	AG	GG	GG	AG	GG	GG	AG	GG	AG	GG	AG	GG	AG	AG	AG	AG	GG	GG	AG	GG	NN	AG	GG	AG	GG	GG	GG	AG	GG	GG	GG	GG	AG	GG	GG	GG	GG	AG	AG
SSL2.50ch01_5615108	C	T	CT	CT	CC	CC	CT	CT	CT	CT	CC	CC	CT	CC	CT	CT	CT	CT	CC	CT	CC	CT	CC	CC	CC	CC	CT	CT	CC	CT	CT	CC	CT	CT	CT	CT	CT	CC	CC	NN	NN	CT	CT	CC	CT	CC	CT	CC	CC
SSL2.50ch01_5615120	T	A	TT	TT	TT	TT	TT	TT	AT	TT	TT	TT	TT	TT	TT	TT	AT	TT	TT	TT	AT	TT	TT	AT	AT	TT	TT	TT	AT	TT	NN	TT	TT	TT	TT	TT	TT	TT	TT	TT	TT	TT	TT	TT	TT	TT	TT	TT	TT
SSL2.50ch01_5615128	A	T	AT	AT	AA	AA	AT	AT	AT	AT	AA	AA	AT	AA	AT	AA	AT	AT	AA	AA	AA	AA	AA	AA	AA	AA	AT	AT	AA	AT	AT	AA	AT	AA	AT	AT	AT	AA	AA	NN	NN	AT	AT	AA	AT	AA	AT	AA	AA
SSL2.50ch01_5619883	C	A	AC	CC	NN	CC	CC	CC	CC	CC	CC	CC	CC	CC	CC	CC	CC	AC	CC	AC	CC	CC	CC	CC	CC	CC	CC	CC	CC	CC	CC	CC	AC	CC	NN	CC	CC	AC	CC	CC	CC	CC	CC	NN	CC	CC	CC	AC	AC
SSL2.50ch01_5619930	T	C	CT	CT	TT	CT	CT	TT	CT	CT	CT	TT	TT	TT	CT	TT	TT	CT	CT	CT	CT	CT	CT	CT	CT	TT	CT	CT	CT	CT	CT	CT	CT	CT	CT	CT	CT	CT	CT	CT	CT	CT	CT	CT	CT	CT	CT	CT	CT
SSL2.50ch01_5619937	C	A	AC	AC	CC	AC	AC	AC	AC	AC	AC	CC	CC	CC	AC	AC	AC	AC	AC	AC	AC	AC	AC	AC	AC	CC	AC	AC	AC	AC	AC	AC	AC	AC	AC	AC	AC	AC	AC	AC	AC	AC	AC	AC	AC	AC	AC	AC	AC
SSL2.50ch01_5619959	G	A	NN	GG	AG	NN	GG	GG	GG	GG	GG	GG	AG	GG	GG	GG	GG	GG	GG	GG	GG	GG	AG	GG	AG	AG	GG	GG	GG	GG	GG	GG	GG	GG	GG	GG	GG	GG	GG	GG	GG	GG	GG	GG	GG	GG	GG	GG	GG
SSL2.50ch01_5619963	A	G	AG	AA	NN	AA	AA	AA	AA	AA	AA	AA	AA	AA	AA	AA	AA	AG	AA	AG	AA	AA	AA	AA	AA	AA	AA	AA	AA	AA	AA	AA	AG	AA	NN	AA	AA	AG	AA	AA	AA	AA	AA	NN	AA	AA	AA	AG	AG
SSL2.50ch01_5619965	G	C	CG	CG	GG	CG	CG	GG	CG	CG	CG	GG	GG	GG	CG	GG	GG	CG	CG	CG	CG	CG	CG	CG	CG	GG	CG	CG	CG	CG	CG	CG	CG	CG	CG	CG	CG	CG	CG	CG	CG	CG	CG	CG	CG	CG	CG	CG	CG
SSL2.50ch01_5657716	T	C	TT	CC	TT	TT	TT	TC	CC	CC	CC	TC	CC	CC	CC	CC	TC	TT	TC	TT	TT	TT	CC	TT	TT	TT	TT	CC	TT	TC	TT	TT	TT	TT	CC	CC	TT	TT	TT	CC	TT	TT	TT	TT	TT	CC	TT	CC	TT
SSL2.50ch01_5679364	T	C	CC	TT	CC	CC	TT	TT	TT	TT	TT	TT	TT	TT	TT	TT	CT	CC	CC	CC	TT	TT	TT	CC	TT	CC	CT	TT	CC	CT	TT	TT	TT	TT	CC	TT	CC	CC	CC	CC	CC	CC	CC	CC	CC	TT	CC	TT	TT
SSL2.50ch01_5825880	C	T	CC	CC	CC	CC	CC	CC	CC	CC	CC	CC	CC	CC	CC	CC	CC	CC	TC	CC	CC	CC	CC	CC	CC	CC	TC	CC	CC	CC	CC	TT	CC	TT	CC	NN	CC	CC	CC	CC	CC	CC	CC	CC	CC	CC	CC	CC	CC
SSL2.50ch01_5825975	T	C	TT	CC	TT	TT	TT	TT	TT	TT	TT	TT	TT	TT	TT	TT	TT	TT	TT	TT	TT	TT	TT	TT	TT	TT	TT	TT	TT	TT	TT	TT	TT	TT	CC	NN	TT	TT	TT	TT	TT	TT	TT	TT	TT	CC	TT	TT	TT
SSL2.50ch01_5831884	A	C	AA	AA	AA	AA	AA	AA	AA	AA	AA	AA	AA	AA	AA	AA	AA	AA	CA	AA	AA	AA	AA	AA	AA	AA	CA	AA	AA	AA	AA	CC	AA	CC	AA	AA	AA	AA	AA	AA	AA	AA	AA	AA	AA	AA	AA	AA	AA
SSL2.50ch01_6064553	A	T	AA	AA	AA	AA	NN	TT	TT	NN	NN	AA	NN	AA	AA	NN	NN	AA	AA	AA	AA	NN	AA	AA	AA	AA	AA	AA	AA	AA	AA	NN	AA	AA	AA	AA	AA	AA	AA	AA	AA	AA	AA	AA	AA	AA	AA	AA	AA
SSL2.50ch01_6064565	T	A	AA	TT	AA	AA	NN	AA	AA	NN	NN	TT	NN	TT	TT	NN	NN	TT	TT	TT	TT	NN	TT	TT	TT	TT	TT	TT	AA	TA	TT	NN	TT	TT	TT	AA	AA	TA	TT	TT	AA	TT	TT	TT	AA	AA	TT	AA	TT
SSL2.50ch01_6166905	T	C	TT	TT	TT	TT	TT	TC	CC	TT	TT	TT	NN	TT	TT	TT	TT	TT	TT	TT	TT	TT	TT	TT	TT	TT	TT	TT	TT	TT	TT	TT	TT	TT	TT	TT	TT	TT	CC	TT	TC	TT	TT	TT	TT	TT	TT	TT	TT
SSL2.50ch01_6222328	G	T	GG	GG	GG	GG	GG	GG	GG	TT	TT	GT	GG	TT	TT	TT	GG	GG	GG	GG	GG	GG	GG	GG	GG	GG	GG	GG	GG	GG	GG	GG	GG	GG	GG	GG	GG	GG	GG	GG	GG	GG	GG	GG	GG	GG	GG	GG	GG
SSL2.50ch01_6229722	A	G	GG	AA	AA	GG	AA	AA	AA	AA	AA	AA	AA	AA	AA	AA	AA	AA	GG	GG	AA	AA	AA	AA	AA	GG	GG	GG	AA	GG	AA	GG	AA	AA	GG	GG	GG	GG	AA	AA	GA	GG	AA	GG	AA	GG	GG	AA	GG
SSL2.50ch01_6231123	C	T	NN	CC	CC	NN	CC	CC	CC	CC	NN	CC	CC	CC	CC	CC	CC	CC	CC	CC	CC	CC	CC	CC	CC	CC	CC	TT	CC	TC	NN	CC	CC	CC	TT	CC	CC	CC	CC	CC	CC	CC	CC	CC	CC	TT	TT	CC	TT
SSL2.50ch01_6231158	C	G	NN	CC	CC	NN	CC	GC	CC	GC	NN	CC	GG	CC	CC	CC	CC	CC	CC	CC	CC	CC	CC	CC	CC	CC	CC	CC	CC	CC	NN	CC	CC	CC	CC	CC	CC	CC	CC	CC	CC	CC	CC	CC	CC	CC	CC	CC	CC
SSL2.50ch01_6231194	A	T	NN	AA	AA	NN	AA	AT	AA	AA	AA	AA	TT	AA	AA	AA	AA	AA	AA	AA	AA	AA	AA	AA	AA	AA	AA	AA	AA	AA	AA	AA	AA	AA	AA	AA	AA	AA	AA	AA	AA	AA	AA	AA	AA	AA	AA	AA	AA
SSL2.50ch01_6318064	G	A	GG	GG	GG	NN	GG	GG	GG	GG	GG	GG	GG	GG	GG	NN	GG	GG	AG	AA	AA	GG	GG	GG	GG	NN	GG	GG	GG	AG	GG	GG	GG	GG	GG	AA	AG	AA	GG	GG	AG	GG	GG	NN	AA	GG	GG	GG	GG
SSL2.50ch01_6320782	G	A	AA	AA	GG	GG	GG	GG	AA	AA	AA	AA	AA	GG	AA	AA	GA	AA	GG	GG	GG	AA	GG	AA	AA	GG	GG	GG	AA	GG	AA	GG	AA	AA	GG	GG	GG	GG	GG	GG	GG	GG	AA	GG	GG	GG	GG	AA	GG
SSL2.50ch01_6320865	C	T	CC	CC	CC	CC	CC	CC	CC	CC	CC	CC	CC	CC	CC	CC	CC	CC	CC	CC	CC	CC	CC	CC	CC	CC	CC	TT	CC	CT	CC	CC	CC	CC	TT	CC	CC	CC	CC	CC	CC	CC	CC	CC	CC	TT	TT	CC	TT
SSL2.50ch01_6470462	T	C	TT	CC	NN	TT	TT	TT	TT	TT	NN	TT	TT	TT	TT	TT	TT	TT	TT	TT	TT	TT	NN	TT	TT	CC	NN	TT	TT	TC	TT	TT	TT	TT	TT	TT	TT	TT	TT	TT	TT	TT	TT	NN	TT	CC	CC	TT	CC
SSL2.50ch01_6470467	T	G	TT	GG	NN	TT	TT	TT	TT	TT	NN	TT	TT	TT	TT	TT	TT	TT	TT	TT	TT	TT	NN	TT	TT	TT	NN	TT	TT	TG	TT	TT	TT	TT	TT	TT	TT	TT	TT	TT	TT	TT	TT	NN	TT	TT	GG	TT	GG
SSL2.50ch01_7462321	T	C	TC	TT	TC	TC	TT	NN	TC	NN	NN	TC	TC	NN	TT	TC	TT	NN	TT	TC	TC	TC	TC	TC	TC	NN	TC	TC	TC	TC	CC	CC	CC	TC	TC	TC	TT	TT	TC	TC	TC	TC	TC	TT	TC	TC	TC	TC	TC
SSL2.50ch01_7462326	C	A	CA	CC	CA	CA	CC	NN	CA	NN	NN	CA	CA	NN	CC	CA	CC	NN	CC	CA	CA	CA	CA	CA	CA	NN	CA	CA	CA	CA	AA	AA	AA	CA	CA	CA	CC	CC	CA	CA	CA	CA	CA	CC	CA	CA	CA	CA	CA
SSL2.50ch01_7462336	G	T	GG	GG	GG	TG	GG	GG	GG	GG	NN	GG	TG	GG	GG	GG	GG	NN	GG	GG	TG	GG	GG	GG	GG	GG	GG	GG	GG	GG	GG	GG	GG	GG	GG	TG	TT	TT	GG	GG	GG	GG	GG	TG	GG	GG	GG	TG	GG
SSL2.50ch01_7462339	G	T	TG	GG	TG	TG	GG	NN	TG	NN	NN	TG	TG	NN	GG	TG	GG	NN	GG	TG	TG	TG	TG	TG	TG	NN	TG	TG	TG	TG	TT	TT	TT	TG	TG	TG	GG	GG	TG	TG	TG	TG	TG	GG	TG	TG	TG	TG	TG
SSL2.50ch01_7619693	C	T	CC	TT	CC	CC	CC	CC	TT	CC	CC	CC	CC	CC	CC	CC	CT	CC	CT	CC	CC	TT	CC	TT	CC	CC	CT	CC	CC	CT	TT	TT	TT	TT	CC	CC	CC	CC	CC	CC	CC	CC	CC	CC	CC	CC	TT	CC	TT
SSL2.50ch01_8429745	G	A	GG	GG	GG	GG	GG	AA	GG	AA	AA	GG	GG	AA	AA	NN	NN	GG	GG	GG	GG	GG	GG	GG	GG	GG	GG	GG	GG	GG	GG	NN	GG	GG	NN	GG	GG	GG	GG	GG	GG	GG	GG	GG	GG	GG	GG	GG	GG
SSL2.50ch01_8429783	C	A	CC	CC	CC	CC	CC	CC	CC	CC	CC	CC	CC	CC	CC	NN	NN	NN	CC	CC	CC	AA	CC	CC	CC	CC	CC	CC	CC	CC	CC	CC	CC	AA	NN	CC	CC	CC	NN	CC	CC	CC	CC	CC	CC	CC	CC	CC	CC
SSL2.50ch01_8429789	T	G	TT	TT	TT	TT	TT	GG	TT	GG	GG	GG	TT	GG	GG	NN	NN	NN	TT	TT	TT	TT	GG	TT	TT	TT	TT	TT	TT	TT	TT	TT	TT	TT	NN	TT	TT	TT	NN	TT	TT	TT	TT	TT	TT	TT	TT	TT	TT
SSL2.50ch01_8429838	C	T	TT	CC	CC	CC	CC	CC	CC	CC	CC	CC	CC	CC	CC	NN	NN	NN	CT	TT	CC	CC	CC	CC	CC	TT	CT	CC	CC	CC	CC	CC	CC	CC	NN	CC	CC	CC	NN	CC	CC	TT	CC	CC	CC	CC	CC	CC	CC
SSL2.50ch01_8635615	C	A	CC	CC	CC	AA	CC	CC	CC	CC	CC	NN	AA	CC	CC	NN	CC	CC	CC	CC	AA	CC	NN	NN	CC	CC	CC	CC	CC	CC	CC	CC	CC	CC	CC	AA	AA	AA	CC	CC	CC	CC	CC	AA	CC	CC	CC	AA	CC
SSL2.50ch01_8687027	C	T	CC	CC	CC	CC	CC	TC	CC	TT	NN	CC	CC	TT	TT	CC	CC	CC	CC	CC	CC	CC	CC	CC	CC	CC	CC	CC	CC	CC	CC	CC	CC	CC	CC	CC	CC	CC	CC	CC	CC	CC	CC	CC	CC	CC	CC	CC	CC
SSL2.50ch01_9294421	T	C	TT	TT	TT	TT	TT	CC	TT	CC	CC	CC	NN	CC	CC	CC	TT	NN	TT	TT	TT	TT	NN	TT	TT	TT	TT	TT	TT	TT	TT	TT	TT	TT	TT	TT	TT	NN	TT	TT	TT	TT	TT	NN	TT	TT	TT	TT	TT
SSL2.50ch01_9294445	G	A	GG	GG	GG	GG	GG	AA	GG	AA	AA	GG	NN	AA	AA	GG	GG	NN	GG	GG	GG	GG	NN	GG	GG	GG	GG	GG	GG	GG	GG	GG	GG	GG	GG	GG	GG	NN	GG	GG	GG	GG	GG	NN	GG	GG	GG	GG	GG
SSL2.50ch01_10338893	A	T	AA	AA	AA	AA	AA	TT	AA	TT	TT	TT	AA	TT	TT	TT	AA	AA	AA	AA	NN	AA	TT	AA	AA	AA	AA	AA	AA	AA	AA	AA	AA	AA	AA	AA	AA	AA	NN	NN	AA	AA	AA	AA	AA	AA	AA	AA	AA
SSL2.50ch01_10680120	A	T	AA	AA	NN	AA	AA	TA	TA	AA	TA	AA	AA	TA	AA	TA	AA	AA	AA	AA	TA	TA	AA	AA	AA	AA	TA	AA	AA	TA	AA	TA	TA	AA	AA	TA	AA	AA	AA	AA	TA	AA	TA	TA	TA	TA	TA	TA	TA
SSL2.50ch01_10680122	T	A	TA	TT	TT	TA	TT	TT	TA	TA	TT	TA	TA	TT	TA	NN	TA	TA	TA	TA	TA	TT	TT	TA	TA	TA	TT	TT	TA	TT	TT	TT	TT	TT	TT	TA	AA	NN	TA	TT	TA	TT	TT	TT	TA	TT	TT	TA	TT
SSL2.50ch01_10680126	T	C	TC	TC	TC	TC	TC	TT	NN	TT	TT	TT	TC	TT	TT	TT	TC	TC	TC	TC	TT	TC	TT	TT	TT	TC	TC	TC	TT	TT	TT	TT	TC	CC	TT	NN	TT	TC	TT	TT	TC	TT	TC	TC	TC	TT	TC	TT	TT
SSL2.50ch01_10680130	T	C	TC	TT	TT	TC	TT	TT	TC	TC	TT	TC	TC	TT	TC	NN	TC	TC	TC	TC	TC	TT	TT	TC	TC	TC	TT	TT	TC	TT	TT	TT	TT	TT	TT	TC	CC	NN	TC	TT	TC	TT	TT	TT	TC	TT	TT	TC	TT
SSL2.50ch01_10680145	G	A	GG	GG	NN	GG	GG	GG	GG	GG	GG	GG	GG	GG	GG	GG	GG	GG	GG	GG	GG	GG	GG	GG	GG	GG	GG	GG	GG	GG	GG	GG	GA	GG	GG	GG	GG	GG	GG	GG	GG	GG	AA	GG	GG	GG	GG	GG	GG
SSL2.50ch01_10680156	G	A	GA	GA	GA	GA	GA	GA	GA	GA	GA	GA	GA	GA	GA	GA	GA	GA	GA	GA	GA	GA	AA	GA	GA	GA	GA	AA	GA	GG	GA	GA	GA	AA	GA	NN	GG	GA	GA	GA	GA	AA	GA	GA	GA	GA	GA	GG	GA
SSL2.50ch01_10680158	A	T	TA	TA	TA	TA	TA	TA	TA	TA	TA	TT	TA	TA	TA	TA	TA	TA	TA	TA	TA	TA	TT	TA	TA	TA	TA	TT	TA	AA	TA	TA	TA	TT	TA	NN	AA	TA	TA	TA	TA	TT	TA	TA	TA	TA	TA	AA	TA
SSL2.50ch01_10680183	G	T	GG	TG	TG	GG	GG	GG	GG	TG	GG	GG	GG	GG	TG	GG	GG	GG	GG	GG	GG	GG	TG	GG	GG	GG	GG	GG	GG	GG	GG	GG	GG	GG	GG	GG	GG	GG	TG	GG	GG	GG	GG	GG	GG	GG	GG	GG	GG
SSL2.50ch01_10680188	T	A	TT	TT	TT	TT	TT	TT	TT	TT	TT	TA	TT	TT	TT	TT	NN	TT	TA	TA	TA	TT	TT	TA	TT	TT	TT	TA	TA	TT	TA	TA	TT	TT	TA	TT	TT	TT	TA	NN	TT	AA	TT	TT	TT	TA	TT	TT	TA
SSL2.50ch01_10688330	T	C	TT	TC	TC	TT	TT	TT	NN	TT	TT	TT	TC	TT	TT	TT	TT	TT	TT	TC	TC	NN	TT	TT	TT	TC	TC	TC	TT	TC	TC	NN	TC	TT	TT	TT	TT	TT	TT	TC	TT	TT	TT	NN	TC	TT	TT	TT	TT
SSL2.50ch01_10688331	A	G	AA	AA	GA	AA	AA	AA	GA	AA	AA	AA	AA	AA	AA	AA	GA	GA	AA	AA	AA	NN	AA	AA	AA	AA	AA	AA	AA	AA	GA	NN	AA	AA	NN	AA	GA	GA	AA	AA	GA	AA	AA	AA	AA	AA	AA	GA	GA
SSL2.50ch01_10688334	C	T	TC	TC	TC	TC	TC	TC	TC	TC	TC	TC	TC	TC	TC	TC	CC	TC	CC	TC	TC	NN	CC	TC	TC	TC	TC	TC	CC	TC	TC	NN	TC	TC	NN	CC	CC	TC	TC	TC	CC	TC	TT	NN	TC	TC	NN	TC	TC
SSL2.50ch01_10688337	C	T	TC	TC	CC	CC	TC	CC	CC	TC	CC	CC	CC	CC	CC	CC	CC	CC	CC	CC	TC	NN	CC	NN	CC	CC	CC	CC	TC	CC	CC	NN	CC	CC	CC	TT	CC	NN	TC	CC	CC	CC	CC	CC	TC	TC	CC	CC	CC
SSL2.50ch01_10688342	A	T	AA	TA	TA	AA	AA	AA	NN	AA	AA	AA	TA	AA	AA	AA	AA	AA	AA	TA	TA	NN	AA	AA	AA	TA	TA	TA	AA	TA	TA	NN	TA	AA	AA	AA	AA	AA	AA	TA	AA	AA	AA	TT	TA	AA	AA	AA	AA
SSL2.50ch01_10688344	T	A	TT	TT	TA	TT	TT	TT	TT	TT	TT	TT	TT	TT	TA	TA	TA	TA	TT	TT	TT	NN	TT	TT	TT	TT	TT	TT	TT	TT	TA	NN	TT	TT	NN	TT	TT	TT	TT	TT	TT	TT	TT	TT	TT	TT	TT	TT	TT
SSL2.50ch01_10688347	C	A	CA	CC	CC	CC	CC	CC	CC	CA	CC	CA	CC	CA	CC	CC	CC	CC	CC	CC	CC	NN	CA	CA	CA	CC	CC	CC	CC	CC	CC	NN	CC	CA	CC	CC	CC	CC	CC	CC	CC	CC	CA	CC	CC	CC	CA	CC	CC
SSL2.50ch01_10688354	A	G	GA	GA	GA	GA	GA	GA	GA	GA	GA	GA	GA	GA	GA	GA	AA	GA	AA	GA	GA	NN	AA	GA	GA	GA	GA	GA	AA	GA	GA	NN	GA	GA	NN	AA	NN	GA	GA	GA	AA	GA	GG	NN	GA	GA	NN	GA	GA
SSL2.50ch01_10688357	G	C	GG	GC	GC	GG	GG	GG	NN	GG	GG	GG	GC	GG	GG	GG	GG	GG	GG	GC	GC	NN	GG	GG	GG	GC	GC	GC	GG	GC	GC	NN	GC	GG	GG	GG	NN	GG	GG	GC	GG	GG	GG	NN	GC	GG	GG	GG	GG
SSL2.50ch01_10688361	C	G	CC	GC	GC	GC	GC	CC	GC	CC	GC	GC	GC	GC	GC	CC	GC	GC	GC	GC	CC	NN	GC	GC	GC	GC	NN	GC	GC	GC	GC	NN	GC	CC	NN	CC	GC	GC	CC	CC	GG	GC	CC	CC	GC	CC	NN	GC	GC
SSL2.50ch01_10688368	G	T	GG	GG	GG	GG	GG	GG	GG	GG	GG	GG	GG	GG	GG	GG	GG	GG	GG	GG	GG	NN	GG	GG	GG	GG	GG	NN	NN	GG	GG	NN	GG	GG	TG	GG	GG	GG	GG	GG	GG	TG	TG	GG	GG	GG	TG	GG	GG
SSL2.50ch01_10688374	T	C	TC	TT	TT	TT	TT	TT	TT	TT	TT	TT	TT	TT	TT	TT	TT	TT	TT	TT	TT	NN	TT	TC	TC	TT	TT	TT	TT	TT	TT	NN	TT	TC	TT	TT	TT	TT	TT	TT	TT	TT	TC	TT	TT	TT	TC	TT	TT
SSL2.50ch01_10688379	A	T	TA	TA	AA	AA	TA	AA	AA	AA	AA	AA	AA	AA	AA	AA	AA	AA	AA	AA	AA	NN	AA	NN	AA	AA	AA	AA	TA	AA	AA	NN	AA	AA	AA	TT	AA	NN	AA	AA	AA	AA	AA	AA	TA	TA	AA	AA	AA
SSL2.50ch01_10688380	C	T	CC	TC	TC	CC	TC	CC	TC	CC	CC	CC	CC	CC	TC	CC	CC	CC	TC	CC	CC	NN	CC	TC	CC	CC	CC	TC	NN	CC	CC	NN	NN	CC	CC	CC	TC	CC	CC	CC	CC	TC	CC	CC	TC	CC	NN	TC	TC
SSL2.50ch01_10688386	G	T	GG	GG	GG	TG	NN	GG	TG	GG	GG	TG	GG	GG	TG	GG	GG	TG	GG	GG	GG	NN	GG	GG	GG	GG	GG	GG	GG	GG	GG	NN	GG	GG	GG	GG	GG	TG	GG	GG	GG	GG	GG	GG	GG	TG	GG	TG	TG
SSL2.50ch01_10688389	A	G	AA	AA	GA	AA	AA	AA	GA	AA	GA	AA	AA	GA	AA	AA	GA	GA	AA	AA	AA	NN	AA	AA	AA	AA	AA	AA	AA	NN	GA	NN	AA	AA	NN	AA	GA	GA	AA	AA	GA	AA	AA	AA	AA	AA	AA	GA	GA
SSL2.50ch01_10688396	G	T	GG	GG	GG	TG	NN	GG	TG	GG	GG	GG	GG	GG	TG	GG	GG	TG	GG	GG	GG	NN	GG	GG	GG	GG	GG	GG	GG	GG	GG	NN	GG	GG	GG	GG	GG	TG	GG	GG	GG	GG	GG	GG	GG	TG	GG	TG	TG
SSL2.50ch01_10688425	G	T	GG	GG	GT	GG	GG	GG	GG	GG	GG	GG	GG	GG	GG	GT	GG	GT	GG	GG	GT	GG	GG	GG	GG	GG	GG	GG	GG	GG	GG	NN	GT	GG	GT	GG	GG	GG	GG	GG	GG	GG	GG	GG	GG	GG	GG	GG	GG
SSL2.50ch01_10688430	A	T	AA	AA	AA	AA	AT	AT	AT	AA	AA	AA	AA	AT	AT	AA	AA	NN	AT	AA	AA	AA	AA	AA	AA	AA	AA	AA	AA	AA	AT	NN	AA	AT	AA	AA	AA	AA	AA	AA	AA	AA	AT	AA	AA	AA	AT	AA	AT
SSL2.50ch01_10688436	A	G	AA	AA	AA	AA	AG	AA	AG	AA	AA	AA	AG	AA	AA	AA	AA	AA	AG	AA	AA	AA	AA	AA	AA	AA	AA	AA	AA	AA	AA	NN	AG	AA	AA	AA	AA	AA	AG	AA	AA	AG	AA	AG	AG	NN	AG	NN	AA
SSL2.50ch01_10688441	G	A	AG	AG	GG	AG	GG	GG	GG	GG	GG	GG	GG	GG	GG	GG	AG	GG	AG	AG	GG	NN	AG	AG	GG	AG	AG	GG	GG	GG	GG	NN	GG	AG	GG	AG	GG	AG	GG	GG	NN	GG	GG	GG	AG	AG	GG	GG	AG
SSL2.50ch01_10688451	G	T	GT	GT	GT	GT	GT	GT	TT	GT	GT	GG	GT	GT	GT	GT	GT	NN	GT	GT	GT	NN	GG	GT	GT	GT	GT	GT	GG	GT	GT	NN	GT	GT	GT	GG	GG	GG	GT	GT	GG	GT	GT	GT	GT	GT	TT	GT	GT
SSL2.50ch01_10688452	A	T	AA	AA	AA	AA	AT	AA	AT	AA	AA	AA	AA	AT	AT	AA	AA	NN	AT	AA	AA	AA	AA	AA	AA	AA	AA	AA	AA	AA	AT	NN	AA	AT	AA	AA	AA	AA	AA	AA	AA	AA	AT	AA	AA	AA	AT	AA	AT
SSL2.50ch01_10688456	G	T	GT	GG	GG	GT	GG	GG	GG	GG	GG	GG	GG	GG	GG	GG	GG	GG	GG	GT	GT	GG	GG	GT	GG	GT	GT	GG	GG	GG	GG	NN	GG	GG	GG	GT	GG	GT	GT	GG	NN	GG	GG	GG	GT	GT	GG	GG	GG
SSL2.50ch01_10688458	C	A	CC	AC	AC	CC	AC	CC	CC	AC	AC	AC	AC	CC	AC	CC	AC	AC	CC	CC	CC	AC	AC	CC	AC	CC	CC	CC	AC	CC	CC	NN	AC	AC	AC	AC	AA	AC	CC	AC	AC	CC	CC	CC	CC	CC	CC	AC	CC
SSL2.50ch01_10688467	A	G	AG	AG	AG	AG	AG	AG	GG	AG	AG	AA	AG	AG	AG	AG	AG	NN	AG	AG	AG	NN	AA	AG	AG	AG	AG	AG	AA	AG	AG	NN	AG	AG	AG	AA	AA	AA	AG	AG	AA	AG	AG	AG	AG	AG	GG	AG	AG
SSL2.50ch01_10688468	T	A	TT	AT	AT	TT	AT	TT	TT	AT	AT	AT	AT	TT	AT	TT	NN	AT	TT	TT	TT	AT	AT	TT	AT	TT	TT	TT	AT	TT	TT	NN	AT	AT	AT	AT	AA	AT	TT	AT	AT	TT	TT	TT	TT	TT	TT	AT	TT
SSL2.50ch01_10688481	T	C	TT	TT	TT	TT	CT	TT	CT	TT	TT	TT	CT	TT	TT	TT	TT	TT	CT	TT	TT	TT	TT	TT	TT	TT	TT	TT	TT	TT	TT	NN	CT	TT	TT	TT	TT	TT	CT	TT	TT	CT	TT	CT	CT	NN	CT	CT	TT
SSL2.50ch01_10688485	G	T	GG	GG	GG	GG	GT	GG	GT	GG	GG	GG	GG	GT	GT	GG	GG	NN	GT	GG	GG	GG	GG	GG	GG	GG	GG	GG	GG	GG	GT	NN	GG	GT	GG	GG	GG	GG	GG	GG	GG	GG	GT	GG	GG	GG	GT	GG	GT
SSL2.50ch01_10688490	A	C	AA	AC	AA	AC	AA	AA	AC	AA	AA	AA	AA	AA	AA	AA	AA	AA	AA	AC	AA	AA	AA	AA	AC	NN	AC	AC	AA	AA	AA	NN	AA	AA	AA	AA	AA	AA	AA	AC	AA	AC	AA	AA	AA	AA	AC	AA	AA
SSL2.50ch01_10688493	C	T	CC	CC	CC	CC	CT	CT	CT	CC	CC	CC	CC	CT	CT	CC	CC	NN	CT	CC	CC	CC	CC	CC	CC	CC	CC	CC	CC	CC	CT	NN	CC	CT	CC	CC	CC	CC	CC	CC	CC	CC	CT	CC	CC	CC	CT	CC	CT
SSL2.50ch01_10688499	G	A	GG	AG	GG	AG	GG	GG	AG	GG	GG	GG	GG	GG	GG	GG	GG	GG	GG	AG	GG	GG	GG	GG	AG	NN	AG	AG	GG	GG	GG	NN	GG	GG	GG	GG	GG	GG	GG	AG	GG	AG	GG	GG	GG	GG	AG	GG	GG
SSL2.50ch01_10688502	T	A	AT	TT	TT	AT	TT	AT	TT	TT	TT	TT	TT	TT	TT	TT	AT	TT	TT	AT	TT	TT	AT	AT	TT	AT	AT	TT	TT	TT	TT	NN	TT	TT	TT	AT	TT	AT	TT	TT	NN	TT	TT	TT	AT	AT	TT	TT	TT
SSL2.50ch01_10819961	G	A	GG	AG	GG	GG	GG	GG	GG	GG	GG	GG	GG	GG	GG	GG	NN	GG	GG	GG	NN	GG	GG	GG	GG	NN	NN	GG	GG	GG	GG	GG	GG	GG	GG	GG	GG	NN	GG	GG	GG	GG	GG	GG	GG	GG	GG	AG	AG
SSL2.50ch01_10820002	C	A	AC	CC	CC	CC	CC	CC	CC	CC	CC	CC	CC	CC	CC	CC	NN	CC	AC	NN	CC	CC	CC	CC	CC	NN	CC	CC	CC	CC	NN	AC	CC	CC	CC	CC	CC	NN	CC	CC	CC	AC	CC	AC	CC	CC	CC	CC	CC
SSL2.50ch01_10941212	A	G	AA	AA	NN	AA	NN	AG	NN	AA	AG	AA	AA	AA	AA	AA	AA	AG	AA	NN	AA	NN	AA	AA	AA	AA	AA	AG	AA	NN	AA	NN	AA	AA	AA	AA	AA	AA	AA	AA	NN	AG	NN	AA	AA	AA	AA	AG	AA
SSL2.50ch01_10941224	G	T	GG	GT	GG	GG	NN	GG	NN	GG	GT	GT	GG	GT	GT	GG	GG	GG	GG	NN	GG	NN	GG	GT	GG	GG	GG	GG	GG	NN	GG	NN	GG	GT	GG	GG	GG	GG	GG	GG	NN	GG	NN	GG	GG	GG	GG	GG	GT
SSL2.50ch01_10941232	G	T	GG	GG	GG	GG	NN	GG	NN	GG	GG	GT	GG	GG	GT	GT	GT	GG	GT	NN	GT	NN	GT	GG	GT	GT	GG	GT	GT	NN	GG	NN	GT	GT	GG	GT	GG	GG	GT	GT	NN	GT	NN	GT	GG	GG	GT	GT	GG
SSL2.50ch01_10941238	C	A	CC	AC	CC	CC	NN	CC	NN	CC	CC	CC	CC	CC	AC	CC	CC	CC	CC	NN	CC	NN	CC	AC	CC	CC	CC	CC	CC	NN	CC	NN	CC	AC	CC	CC	CC	CC	CC	CC	NN	CC	NN	CC	CC	CC	CC	CC	AC
SSL2.50ch01_10941242	T	C	TT	TT	TT	TT	NN	TT	NN	TT	TT	TT	TT	TT	TT	TT	TT	TT	TT	NN	TT	NN	TT	TT	TT	CT	TT	TT	TT	NN	CT	NN	TT	TT	CT	TT	TT	CT	TT	TT	NN	TT	NN	TT	TT	TT	TT	TT	TT
SSL2.50ch01_10941243	T	A	TT	AT	TT	TT	NN	TT	NN	TT	TT	TT	TT	TT	AT	TT	TT	TT	TT	NN	TT	NN	TT	AT	TT	TT	TT	TT	TT	NN	TT	NN	TT	AT	TT	TT	TT	TT	TT	TT	NN	TT	NN	TT	TT	TT	TT	TT	AT
SSL2.50ch01_10941275	G	A	AA	GG	GG	GG	NN	GG	NN	GG	GG	GG	GG	GG	GG	NN	GG	GG	GG	NN	GG	NN	GG	GG	GG	GG	GG	GG	AG	NN	AG	NN	GG	GG	AG	AG	AA	GG	GG	GG	NN	GG	NN	AG	GG	AA	GG	GG	AG
SSL2.50ch01_11218627	C	A	CC	AA	NN	NN	CC	CC	AA	CC	NN	CC	CC	CC	CC	CC	CC	CC	AA	AA	CC	AA	CC	AA	CC	AA	AA	CC	CC	AA	CC	NN	CC	AA	CC	AA	NN	CC	CC	CC	CC	AA	CC	CC	NN	CC	AA	CC	AA
SSL2.50ch01_11891008	T	C	CC	TT	CC	CC	CC	TT	TT	TT	TT	TT	CC	TT	TT	TT	TC	CC	TT	TT	TT	TT	TT	TT	CC	TT	TT	CC	CC	TT	CC	TT	CC	TT	CC	TT	CC	CC	TT	TT	CC	TT	CC	CC	TT	CC	TT	CC	TT
SSL2.50ch01_11891146	A	C	AA	AA	AA	AA	AA	CC	AA	CC	CC	CC	AA	CC	CC	CC	AA	AA	AA	AA	CC	AA	CC	AA	AA	AA	AA	AA	AA	AC	AA	AA	AA	AA	AA	AA	AA	AA	CC	CC	AA	AA	AA	AA	AA	AA	AA	AA	AA
SSL2.50ch01_12070903	C	T	CC	CC	CC	CC	CC	NN	CC	TT	NN	CC	NN	NN	NN	CC	NN	CC	CC	TC	TT	CC	NN	CC	TC	CC	CC	TC	CC	NN	CC	CC	CC	CC	CC	CC	CC	CC	TT	TT	CC	CC	CC	CC	CC	NN	TC	CC	CC
SSL2.50ch01_12070910	G	T	GG	GG	GG	GG	GG	NN	GG	TT	NN	GG	NN	NN	NN	GG	NN	GG	GG	TG	TT	GG	NN	GG	TG	GG	GG	TG	GG	NN	GG	GG	GG	GG	GG	GG	GG	GG	TT	TT	GG	GG	GG	GG	GG	NN	TG	GG	GG
SSL2.50ch01_12070916	T	C	TT	TT	TT	TT	TT	NN	TT	CC	NN	TT	NN	NN	NN	TT	NN	TT	TT	TC	CC	TT	NN	TT	TC	TT	TT	TC	TT	NN	TT	TT	TT	TT	TT	TT	TT	TT	CC	CC	TT	TT	TT	TT	TT	NN	TC	TT	TT
SSL2.50ch01_12070930	G	T	GG	GG	GG	GG	GG	NN	GG	TT	NN	TT	NN	NN	NN	TT	NN	GG	GG	TG	TT	GG	NN	GG	TG	GG	GG	TG	GG	NN	GG	GG	GG	GG	GG	GG	GG	GG	TT	TT	GG	GG	GG	GG	GG	NN	TG	GG	GG
SSL2.50ch01_12070954	C	T	CC	CC	CT	CC	CC	NN	CT	CC	CC	CC	CT	CT	CC	CC	CT	CC	CC	CC	CC	CT	CC	CC	CC	CT	CC	CC	CC	NN	CC	CT	CC	CC	CC	CC	CT	CC	NN	NN	CC	CC	CC	CC	CT	CT	CC	CT	CT
SSL2.50ch01_12071038	G	A	GG	GG	AG	GG	GG	AG	GG	GG	AG	GG	GG	GG	GG	GG	AG	GG	GG	GG	AG	GG	AG	GG	GG	GG	GG	GG	GG	GG	GG	GG	GG	GG	AG	GG	GG	GG	AG	GG	GG	GG	GG	GG	GG	GG	GG	GG	GG
SSL2.50ch01_12075663	T	C	TT	TT	TT	TT	TT	CC	TT	CC	CC	CC	TT	CC	CC	CC	TT	TT	TT	TT	CC	TT	NN	TT	TT	NN	TT	TT	NN	TC	TT	TT	TT	TT	NN	TT	TT	TT	CC	CC	TT	TT	TT	TT	TT	TT	TT	TT	TT
SSL2.50ch01_12075751	C	T	CC	CC	CC	CC	CC	CC	CT	CC	CC	CT	CT	CT	CC	CC	CT	CC	CT	CC	CC	CT	CC	CC	CC	CC	CC	CC	CC	CT	CC	CT	CC	CC	NN	CC	CT	CC	CC	CC	CC	CC	CC	CC	CT	CT	CC	CT	CT
SSL2.50ch01_12279227	G	A	GG	AA	GG	GG	GG	GG	AA	GG	GG	GG	GG	GG	GG	GG	GG	GG	AA	AA	GG	AA	GG	AA	GG	AA	AA	GG	GG	GG	GG	NN	GG	AA	GG	AA	GG	GG	GG	GG	GG	AA	GG	GG	NN	GG	AA	GG	AA
SSL2.50ch01_12279261	C	T	TT	CC	TT	TT	TT	CC	CC	CC	CC	CC	TT	CC	CC	CC	TC	TT	CC	CC	CC	CC	CC	CC	TT	CC	CC	TT	TT	CC	TT	NN	TT	CC	TT	CC	TT	TT	CC	CC	TT	CC	TT	TC	NN	TT	CC	TT	CC
SSL2.50ch01_12932566	C	A	CC	CC	CC	CC	CC	CC	CC	CC	NN	CC	CC	CC	CC	CC	CC	CC	CC	NN	NN	CA	NN	CC	CC	CC	CA	CC	CC	NN	CC	CC	CC	CC	CC	NN	CC	CC	CC	CC	CC	CC	CC	CA	CC	CC	CA	NN	CC
SSL2.50ch01_12932569	G	A	GG	GG	GG	GG	GG	GG	GG	GG	NN	GG	GG	GG	GG	GG	GG	GG	GG	NN	NN	GA	NN	GG	GG	GG	GA	GG	GG	NN	GG	GG	GG	GG	GG	NN	GG	GG	GG	GG	GG	GG	GG	GA	GG	GG	GA	NN	GG
SSL2.50ch01_12932575	C	G	CC	CC	CC	CC	CC	CC	CC	CC	NN	CC	CC	CC	CC	CC	CC	CC	CC	NN	NN	GC	NN	CC	CC	CC	GC	CC	CC	NN	CC	CC	CC	CC	CC	NN	CC	CC	CC	CC	CC	CC	CC	GC	CC	CC	GC	NN	CC
SSL2.50ch01_12932579	C	A	CC	CC	CC	CC	CC	CC	CC	CC	NN	CC	CC	CC	CC	CC	CC	CC	CC	NN	NN	CA	NN	CC	CC	CC	CA	CC	CC	NN	CC	CC	CC	CC	CC	NN	CC	CC	CC	CC	CC	CC	CC	CA	CC	CC	CA	NN	CC
SSL2.50ch01_12932582	T	A	TT	TT	TT	TT	TT	TT	TT	TT	NN	TT	TT	TT	TT	TT	TT	TT	TT	NN	NN	TA	NN	TT	TT	TT	TA	TT	TT	NN	TT	TT	TT	TT	TT	NN	TT	TT	TT	TT	TT	TT	TT	TA	TT	TT	TA	NN	TT
SSL2.50ch01_12932592	A	T	AA	AA	AA	AA	AA	AA	AA	AA	NN	AA	AA	AA	AA	AA	AA	AA	AA	NN	NN	TA	NN	AA	AA	AA	TA	AA	AA	NN	AA	AA	AA	AA	AA	NN	AA	AA	AA	AA	AA	AA	AA	TA	AA	AA	TA	NN	AA
SSL2.50ch01_12932601	G	T	GG	TT	GG	GG	GG	GG	TT	GG	NN	GG	GG	GG	GG	GG	GG	GG	GG	NN	NN	TG	NN	TT	GG	GG	TG	GG	GG	NN	GG	TT	GG	TT	GG	NN	GG	GG	GG	GG	GG	GG	GG	GG	GG	GG	TG	NN	TT
SSL2.50ch01_12932602	G	A	GG	GG	GG	GG	GG	GG	GG	GG	NN	GG	GG	GG	GG	GG	GG	GG	GG	NN	NN	GA	NN	GG	GG	GG	GA	GG	GG	NN	GG	GG	GG	GG	GG	NN	GG	GG	GG	GG	GG	GG	GG	GA	GG	GG	GA	NN	GG
SSL2.50ch01_12932606	T	C	TT	TT	TT	TT	TT	TT	TT	TT	NN	TT	TT	TT	TT	TT	TT	TT	TT	NN	NN	TC	NN	TT	TT	TT	TC	TT	TT	NN	TT	TT	TT	TT	TT	NN	TT	TT	TT	TT	TT	TT	TT	TC	TT	TT	TC	NN	TT
SSL2.50ch01_12932630	C	T	CC	CC	CC	CC	CC	CC	CC	CC	NN	CC	CC	CC	CC	CC	CC	CC	CC	NN	NN	TC	NN	CC	CC	CC	TC	CC	CC	NN	CC	CC	CC	CC	CC	NN	CC	CC	CC	CC	CC	CC	CC	TC	CC	CC	TC	NN	CC
SSL2.50ch01_12932632	T	A	TT	TT	TT	TT	TT	TT	TT	TT	NN	TT	TT	TT	TT	TT	TT	TT	TT	NN	NN	TA	NN	TT	TT	TT	TA	TT	TT	NN	TT	TT	TT	TT	TT	NN	TT	TT	TT	TT	TT	TT	TT	TA	TT	TT	TA	NN	TT
SSL2.50ch01_12932637	G	T	GG	GG	GG	GG	GG	GG	GG	GG	NN	GG	GG	GG	GG	GG	GG	GG	GG	NN	NN	TG	NN	GG	GG	GG	TG	GG	GG	NN	GG	GG	GG	GG	GG	NN	GG	GG	GG	GG	GG	GG	GG	TG	GG	GG	TG	NN	GG
SSL2.50ch01_12934282	T	C	TC	TC	TC	TT	TC	CC	NN	CC	CC	CC	TC	TC	TC	CC	CC	TC	TC	TT	TC	TC	CC	TC	TC	TT	TC	TC	TC	NN	TC	CC	TC	TT	TT	CC	TT	TC	CC	TC	TC	TT	TC	TT	TC	CC	TT	CC	TT
SSL2.50ch01_12934286	T	G	TG	TG	TG	TT	TG	GG	NN	GG	GG	GG	TG	TG	TG	GG	TG	TG	TG	TT	TG	TG	GG	TG	TG	TT	TG	TG	TG	NN	TG	GG	TG	TT	TT	GG	TT	TG	GG	TG	TG	TT	TG	TT	TG	GG	TT	GG	TT
SSL2.50ch01_12934291	T	C	TC	TC	TC	TT	TC	CC	NN	CC	CC	CC	TC	TC	TC	CC	TC	TC	TC	TT	TC	TC	CC	TC	TC	TT	TC	TC	TC	NN	TC	CC	TC	TT	TT	CC	TT	TC	CC	TC	TC	TT	TC	TT	TC	CC	TT	CC	TT
SSL2.50ch01_12934293	G	T	TG	TG	TG	GG	TG	TG	NN	TT	TT	TG	TG	TG	TG	TT	TG	TG	TG	GG	TG	TG	TG	TG	TG	GG	TG	TG	TG	NN	TG	TT	TG	GG	GG	TT	GG	TG	TT	TG	TG	GG	TG	GG	TG	TT	GG	TT	GG
SSL2.50ch01_12934300	C	G	GC	GC	GC	CC	GC	GC	NN	GG	GG	GC	GC	GC	GC	GG	GC	GC	GC	CC	GC	GC	GC	GC	GC	CC	GC	GC	GC	NN	GC	GG	GC	CC	CC	GG	CC	GC	GG	GC	GC	CC	GC	CC	GC	GG	CC	GG	CC
SSL2.50ch01_12934301	G	A	GA	GA	GA	GG	GA	GA	NN	AA	AA	GA	GA	GA	GA	AA	GA	GA	GA	GG	GA	GA	GA	GA	GA	GG	GA	GA	GA	NN	GA	AA	GA	GG	GG	AA	GG	GA	AA	GA	GA	GG	GA	GG	GA	AA	GG	AA	GG
SSL2.50ch01_12934318	C	T	TC	TC	TC	CC	TC	TC	NN	TT	TT	TC	TC	TC	TC	TT	TC	TC	TC	CC	TC	TC	TC	TC	TC	CC	TC	TC	TC	NN	TC	TT	TC	CC	CC	TT	CC	TC	TT	TC	TC	CC	TC	CC	TC	TT	CC	TT	CC
SSL2.50ch01_12934319	G	C	GC	GG	GC	GG	GC	GG	NN	GG	GG	GG	GC	GG	GG	GG	GG	GC	GG	GG	GG	GG	GG	GG	GC	GG	GG	GC	GC	NN	GC	GG	GC	GG	GG	GG	GG	GC	GG	GG	GC	GG	GC	GG	GG	CC	GG	CC	GG
SSL2.50ch01_12934348	T	C	TC	TC	TC	TT	TC	TC	NN	CC	CC	TC	TC	TC	TC	CC	TC	TC	TC	TT	TC	TC	TC	TC	TC	TT	TC	TC	TC	NN	TC	CC	TC	TT	TT	CC	TT	TC	CC	TC	TC	TT	TC	TT	TC	CC	TT	CC	TT
SSL2.50ch01_12934349	G	A	GA	GA	GA	GG	GA	GA	NN	AA	AA	GA	GA	GA	GA	AA	GA	GA	GA	GG	GA	GA	GA	GA	GA	GG	GA	GA	GA	NN	GA	AA	GA	GG	GG	AA	GG	GA	AA	GA	GA	GG	GA	GG	GA	AA	GG	AA	GG
SSL2.50ch01_12934376	C	T	CT	CT	CT	CC	CT	CT	NN	TT	TT	CT	CT	CT	CT	TT	NN	CT	CT	CC	CC	CT	CT	CT	CC	CC	CT	CT	CT	NN	CT	TT	CT	CT	CC	TT	CC	CT	NN	CT	CT	CT	CC	CC	CT	NN	CC	TT	CC
SSL2.50ch01_12934378	A	G	AG	AG	AG	AA	AG	AG	NN	GG	GG	AG	AG	AG	AG	GG	NN	AG	AG	AA	AA	AG	AG	AG	AA	AA	AG	AG	AG	NN	AG	GG	AG	AG	AA	GG	AA	AG	NN	AG	AG	AG	AA	AA	AG	NN	AA	GG	AA
SSL2.50ch01_12934398	T	C	CT	CT	TT	TT	CT	CT	NN	CC	CC	CT	CT	CT	CT	CC	NN	CT	TT	TT	TT	CT	CT	CT	TT	TT	CT	CT	CT	NN	CT	CC	CT	CT	TT	CC	TT	CT	NN	NN	CT	CT	TT	TT	CT	NN	TT	CC	TT
SSL2.50ch01_12934399	A	C	AC	AA	AA	AA	AC	AA	NN	AA	AA	AA	AC	AA	AA	AA	AA	AA	AA	AA	AA	AA	AA	AA	AA	AA	AA	AA	AC	NN	AA	AA	AA	AA	AA	AA	AA	AC	NN	AA	AC	AA	AA	AA	AA	NN	AA	AA	AA
SSL2.50ch01_12934409	A	T	AT	AT	AT	AA	AT	AT	NN	TT	TT	AT	AT	AT	AT	TT	NN	AT	AT	AA	AA	AT	AT	AT	AA	AA	AT	AT	AT	NN	AT	TT	AT	AT	AA	TT	AA	AT	NN	AT	AT	AT	AA	AA	AT	NN	AA	TT	AA
SSL2.50ch01_12934429	A	C	AC	AC	AC	AA	AC	AC	NN	CC	CC	AC	AC	AC	AC	CC	NN	AC	AC	AA	AA	AC	AC	AC	AA	AA	AC	AC	AC	NN	AC	CC	AC	AC	AA	CC	AA	AC	NN	AC	AC	AC	AA	AA	AC	NN	AA	CC	AA
SSL2.50ch01_12934438	C	A	AC	AC	AC	CC	AC	AC	NN	AA	AA	AC	AC	AC	AC	AA	NN	AC	AC	CC	CC	AC	AC	AC	CC	CC	AC	AC	AC	NN	AC	AA	AC	AC	CC	AA	CC	AC	NN	AC	AC	AC	CC	CC	AC	NN	CC	AA	CC
SSL2.50ch01_12934447	A	C	AC	AC	AC	AA	AC	AC	NN	CC	CC	AC	AC	AC	AC	CC	NN	AC	AC	AA	AA	AC	AC	AC	AA	AA	AC	AC	AC	NN	AC	CC	AC	AC	AA	CC	AA	AC	NN	AC	AC	AC	AA	AA	AC	NN	AA	CC	AA
SSL2.50ch01_12936209	G	A	GA	GA	GA	GA	AA	GA	GA	AA	NN	GA	GA	GA	GA	AA	GA	GA	GA	GA	GA	GA	GA	GG	NN	GA	GA	GA	GA	AA	GA	GA	GA	GA	GA	GA	GA	GA	GG	GG	GA	GA	GA	GA	GA	GG	NN	NN	GA
SSL2.50ch01_12936226	C	G	GC	GC	GC	GC	GG	GC	GC	GG	NN	GC	GC	GC	GC	GG	GC	GC	GC	GC	GC	GC	GC	CC	NN	GC	GC	GC	GC	GG	GC	GC	GC	GC	GC	GC	GC	GC	CC	CC	GC	GC	GC	GC	GC	CC	NN	NN	GC
SSL2.50ch01_12936227	T	A	TA	TA	TA	TA	AA	TA	TA	AA	NN	TA	TA	TA	TA	AA	TA	TA	TA	TA	TA	TA	TA	TT	NN	TA	TA	TA	TA	AA	TA	TA	TA	TA	TA	TA	TA	TA	TT	TT	TA	TA	TA	TA	TA	TT	NN	NN	TA
SSL2.50ch01_12936246	A	G	GA	GA	GA	GA	GG	GA	GA	GG	NN	GA	GA	GA	GA	GG	GA	GA	GA	GA	GA	GA	GA	AA	NN	GA	GA	GA	GA	GG	GA	GA	GA	GA	GA	GA	GA	GA	AA	AA	GA	GA	GA	GA	GA	AA	NN	NN	GA
SSL2.50ch01_12936289	T	C	TT	CT	TT	TT	TT	TT	CT	TT	TT	TT	TT	TT	TT	TT	TT	TT	CT	CT	TT	CT	TT	CT	TT	CT	CT	TT	TT	TT	TT	CT	TT	CT	TT	CT	TT	TT	TT	TT	TT	CT	TT	TT	CT	TT	NN	NN	TT
SSL2.50ch01_12936303	C	G	CG	CG	CG	CG	CC	CG	CG	CC	CC	CG	CG	CG	CG	CC	CG	CG	CG	CG	CG	CG	CG	CG	CG	CG	CG	CG	CG	CC	CG	CG	CG	CG	CG	CG	CG	CG	GG	CG	CG	CG	CG	CG	CG	GG	NN	NN	GG
SSL2.50ch01_12936316	A	G	AG	AG	AG	AG	AA	AG	AG	AA	AA	AG	AG	AG	AG	AA	AG	AG	AG	AG	AG	AG	AG	AG	AG	AG	AG	AG	AG	AA	AG	AG	AG	AG	AG	AG	AG	AG	GG	AG	AG	AG	AG	AG	AG	GG	NN	NN	GG
SSL2.50ch01_12936348	A	G	AG	AG	AG	AG	AA	AG	AG	AA	AA	AG	AG	AG	AG	AA	AG	AG	AG	AG	AG	AG	AG	AG	AG	AG	AG	AG	AG	AA	AG	AG	AG	AG	AG	AG	AG	AG	GG	AG	AG	AG	AG	AG	AG	GG	NN	NN	GG
SSL2.50ch01_12936351	G	A	GG	AG	GG	GG	GG	GG	AG	GG	GG	GG	GG	GG	GG	GG	GG	GG	GG	GG	GG	AG	GG	AG	GG	GG	AG	GG	GG	GG	GG	AG	GG	AG	GG	GG	GG	GG	GG	GG	GG	GG	GG	GG	GG	GG	NN	NN	GG
SSL2.50ch01_12936362	T	C	CT	CT	CT	CT	TT	CT	CT	TT	TT	CT	CT	CT	CT	TT	CT	CT	CT	CT	CT	CT	CT	CT	CT	CT	CT	CT	CT	TT	CT	CT	CT	CT	CT	CT	CT	CT	CC	CT	CT	CT	CT	CT	CT	CC	NN	NN	CC
SSL2.50ch01_13100711	G	T	GG	GG	GG	GG	GG	GG	GG	NN	NN	GG	GG	GG	GG	GG	GG	GG	GG	GG	GG	GG	GG	GG	GG	GG	GG	GG	GG	GG	GG	GG	GG	GG	GG	GG	GG	GG	GG	GG	GG	GG	GG	GG	GG	GG	GG	GG	GG
SSL2.50ch01_13207696	T	C	TT	CT	TT	TT	TT	CT	CT	NN	NN	CT	TT	TT	TT	TT	CT	TT	CT	CT	TT	CC	CT	CT	TT	CT	CT	TT	TT	CT	TT	CC	TT	CT	TT	CT	TT	TT	TT	TT	TT	CT	TT	TT	CT	TT	TT	TT	CT
SSL2.50ch01_13207716	A	T	AA	AT	AA	AA	AA	AA	AT	NN	NN	AA	AA	AA	AA	AA	AA	AA	AT	AT	AA	TT	AA	AT	AA	AT	AT	AA	AA	AT	AA	TT	AA	AT	AA	AT	AA	AA	AA	AA	AA	AT	AA	AA	AT	AA	AA	AA	AT
SSL2.50ch01_13207720	G	A	GG	AG	GG	GG	GG	AG	AG	NN	NN	AG	GG	GG	GG	GG	AG	GG	AG	AG	GG	AA	AG	AG	GG	AG	AG	GG	GG	AG	GG	AA	GG	AG	GG	AG	GG	GG	GG	GG	GG	AG	GG	GG	AG	GG	GG	GG	AG
SSL2.50ch01_13207731	A	G	AA	AG	AA	AA	AA	AG	AG	NN	NN	AG	AA	AA	AA	AA	AG	AA	AG	AG	AA	GG	AG	AG	AA	AG	AG	AA	AA	AG	AA	GG	AA	AG	AA	AG	AA	AA	AA	AA	AA	AG	AA	AA	AG	AA	AA	AA	AG
SSL2.50ch01_13207737	C	G	CC	CG	CC	CC	CC	CG	CG	NN	NN	CG	CC	CC	CC	CC	CG	CC	CG	CG	CC	GG	CG	CG	CC	CG	CG	CC	CC	CG	CC	GG	CC	CG	CC	CG	CC	CC	CC	CC	CC	CG	CC	CC	CG	CC	CC	CC	CG
SSL2.50ch01_13207752	C	T	CC	CT	CC	CC	CC	CT	CT	NN	NN	CT	CC	CC	CC	CC	CT	CC	CT	CT	CC	TT	CT	CT	CC	CT	CT	CC	CC	CT	CC	TT	CC	CT	CC	CT	CC	CC	CC	CC	CC	CT	CC	CC	CT	CC	CC	CC	CT
SSL2.50ch01_13207753	A	G	AA	AG	AA	AA	AA	AG	AG	NN	NN	AG	AA	AA	AA	AA	AG	AA	AG	AG	AA	GG	AG	AG	AA	AG	AG	AA	AA	AG	AA	GG	AA	AG	AA	AG	AA	AA	AA	AA	AA	AG	AA	AA	AG	AA	AA	AA	AG
SSL2.50ch01_14670791	A	T	AA	TT	AA	AA	AA	AA	TT	AA	AA	AA	AA	AA	AA	AA	AA	NN	AA	AA	AA	AA	AA	AA	AA	AA	AA	AA	AA	AT	AA	AA	AA	AA	AA	AA	AA	AA	AA	AA	AA	AA	NN	AA	AA	AA	TT	AA	TT
SSL2.50ch01_14670808	T	C	TT	TT	TT	TT	TT	CT	TT	CC	CC	TT	TT	CC	CC	TT	TT	NN	TT	TT	TT	TT	TT	TT	TT	TT	TT	TT	TT	TT	TT	TT	TT	TT	TT	TT	TT	TT	TT	TT	TT	TT	NN	TT	TT	TT	TT	TT	TT
SSL2.50ch01_14710297	G	C	GG	GG	GG	GG	GG	GG	GG	GG	GG	GG	GG	GG	GG	GG	GG	GG	CG	GG	GG	GG	GG	GG	GG	GG	CG	GG	GG	GG	GG	CC	GG	GG	GG	GG	GG	GG	GG	GG	GG	GG	GG	GG	GG	GG	GG	GG	GG
SSL2.50ch01_14767804	A	C	AA	CC	AA	AA	AA	AA	CC	AA	AA	AA	AA	AA	AA	AA	AA	NN	CC	CC	AA	NN	AA	CC	AA	CC	CC	AA	AA	AA	AA	NN	AA	NN	AA	NN	AA	AA	AA	AA	AA	CC	AA	AA	CC	NN	CC	NN	CC
SSL2.50ch01_15988101	C	T	CC	NN	CC	CC	CC	TT	CC	TT	NN	TT	CC	TT	TT	TT	CT	CC	CC	CC	TT	NN	TT	CC	CC	CC	CC	CC	CC	CC	CC	NN	CC	CC	CC	CC	CC	CC	CC	CC	CC	CC	CC	CC	CC	CC	CC	CC	CC
SSL2.50ch01_16073612	C	A	CC	CC	CC	CC	CC	CC	CC	CC	CC	CC	CC	CC	CC	CC	CC	CA	CC	CC	CC	CA	CC	CA	CC	CC	CA	CC	CC	CC	CC	CA	CC	CC	CC	CC	CA	CC	CC	CC	CA	CC	CA	CA	CC	CC	CC	CA	CC
SSL2.50ch01_16073613	A	T	AA	AA	AA	AA	AA	AA	AA	AA	AA	AA	AA	AA	AA	AA	AA	AA	AA	AA	AA	AA	AA	AA	AA	AA	AA	AA	AA	AA	AA	AA	AA	TA	AA	AA	AA	AA	AA	AA	AA	AA	AA	AA	TA	TA	TA	AA	TA
SSL2.50ch01_16073662	C	A	CC	CC	CC	CC	CC	CC	CC	CC	CC	CC	CC	CC	CC	CC	CC	CC	CC	CC	CC	CC	CC	CC	CC	CC	CC	CC	CC	CC	CC	CC	CC	CA	CC	CC	CC	CC	CC	CC	CC	CC	CC	CC	CA	CA	CA	CC	CA
SSL2.50ch01_16073677	G	A	GG	GG	GG	GG	GG	GA	GG	GG	GG	GG	GG	GG	GG	GG	GG	GG	GG	GG	GG	GG	GG	GG	GG	GA	GG	GG	GG	GG	GG	GG	GG	GG	GG	GG	GG	GG	GG	GG	GG	GG	GG	GG	GG	GG	GG	GG	GG
SSL2.50ch01_16073722	G	T	GG	GG	GG	GG	GG	GG	GG	GG	GG	GG	GG	GG	GG	GG	GG	GG	GT	TT	GG	GG	NN	GG	GG	TT	GT	GG	GG	GG	GG	GG	GG	GG	GG	TT	GG	GG	GG	GG	GG	GG	GG	GG	TT	GG	GG	GG	GG
SSL2.50ch01_16073743	C	T	CC	CC	CC	CC	CC	TT	CC	TT	TT	CC	CC	CC	CC	CC	CC	CC	CC	CC	CC	CC	NN	CC	CC	CC	CC	CC	CC	CC	CC	CC	CC	CC	CC	CC	CC	CC	CC	CC	CC	CC	CC	CC	CC	CC	CC	TT	CC
SSL2.50ch01_16609247	T	A	TT	AA	AA	TT	TT	TT	TT	TT	NN	TT	TT	TT	TT	TT	AT	AA	TT	TT	TT	TT	TT	TT	AA	TT	TT	AA	TT	TT	AA	TT	AA	TT	AA	NN	TT	TT	TT	TT	TT	TT	AA	TT	TT	AA	TT	TT	TT
SSL2.50ch01_16609284	G	A	GG	GG	GG	GG	GG	GG	AA	GG	NN	GG	GG	GG	GG	GG	GG	GG	GG	GG	GG	AA	GG	AA	GG	GG	GG	GG	GG	NN	GG	GG	GG	AA	GG	NN	GG	GG	GG	GG	GG	GG	GG	GG	GG	GG	AA	GG	AA
SSL2.50ch01_16673973	T	A	AA	TT	TT	AA	AA	TT	TT	TT	NN	TT	NN	TT	TT	TT	TT	TT	TT	TT	TT	TT	TT	NN	TT	NN	TT	TT	AA	NN	NN	TT	TT	TT	NN	TT	AA	NN	AA	AA	AA	AA	TT	AA	TT	TT	TT	TT	TT
SSL2.50ch01_16674010	G	A	GG	GG	GG	GG	GG	AG	GG	AA	NN	GG	NN	AA	AA	AA	GG	GG	GG	GG	AA	GG	GG	NN	GG	NN	GG	GG	GG	NN	NN	GG	GG	GG	NN	GG	GG	NN	GG	GG	GG	GG	GG	GG	GG	GG	GG	GG	GG
SSL2.50ch01_16674761	T	A	AA	TT	NN	AA	AA	AA	TT	AA	NN	AA	AA	AA	AA	AA	NN	TT	TT	TT	AA	TT	AA	TT	TT	TT	TT	TT	AA	TT	TT	TT	TT	TT	TT	TT	AA	AA	AA	AA	AA	AA	TT	AA	TT	TT	TT	AA	TT
SSL2.50ch01_16674808	G	C	GG	GG	NN	GG	GG	GC	GG	CC	NN	GC	GG	CC	CC	CC	NN	GG	GG	GG	CC	GG	GG	GG	GG	GG	GG	GG	GG	GG	GG	GG	GG	GG	GG	GG	GG	GG	GG	GG	GG	GG	GG	GG	GG	GG	GG	GG	GG
SSL2.50ch01_18058982	C	A	CC	CC	NN	CC	CC	CC	NN	CC	NN	CC	CC	CC	CC	CC	CC	CC	CC	CC	CC	AA	CC	AC	CC	CC	CC	CC	CC	NN	CC	NN	CC	AC	CC	CC	CC	CC	NN	CC	CC	CC	NN	CC	CC	CC	AC	CC	AC
SSL2.50ch01_18059026	G	C	CG	GG	NN	CG	GG	GG	NN	GG	NN	GG	GG	GG	GG	GG	GG	GG	NN	GG	GG	GG	GG	GG	CG	GG	GG	GG	GG	NN	GG	NN	CC	CG	CG	CG	CC	CG	NN	GG	NN	GG	NN	NN	GG	GG	CG	CG	GG
SSL2.50ch01_18059053	A	C	AC	AA	NN	AC	AA	AA	NN	AA	NN	AA	AA	AA	AA	AA	AA	AA	AA	AA	AA	AA	AA	AA	AC	AA	AA	AA	AA	NN	AA	NN	CC	AC	AC	AC	CC	AC	NN	AA	NN	AA	NN	NN	AA	AA	AC	AC	AA
SSL2.50ch01_18059059	T	G	GT	TT	NN	TT	TT	TT	NN	TT	NN	TT	TT	TT	TT	TT	TT	TT	TT	TT	TT	TT	TT	TT	TT	TT	TT	TT	TT	NN	TT	NN	TT	TT	TT	TT	TT	TT	NN	GT	TT	GT	NN	TT	TT	TT	TT	TT	TT
SSL2.50ch01_18059060	T	C	TT	TT	NN	CT	CC	TT	NN	TT	NN	TT	CT	TT	TT	TT	TT	CC	CT	CC	TT	TT	TT	TT	TT	TT	CT	TT	CC	NN	CT	NN	TT	CT	CT	TT	TT	CT	NN	TT	TT	CT	NN	TT	TT	TT	TT	TT	TT
SSL2.50ch01_18302427	C	A	AA	CC	CC	AA	AA	CC	CC	CC	CC	CC	AA	CC	CC	CC	CC	NN	CC	NN	NN	CC	CC	CC	CC	NN	AA	CC	AA	AA	CC	CC	CC	CC	CC	NN	AA	AA	AA	AA	AA	AA	CC	AA	CC	CC	CC	AA	CC
SSL2.50ch01_18346414	A	T	AA	AA	AA	AA	AA	TT	AA	TT	TT	TT	AA	TT	TT	TT	TA	AA	AA	AA	TT	NN	TT	AA	AA	AA	AA	AA	AA	AA	AA	AA	AA	AA	AA	AA	AA	AA	AA	AA	AA	AA	AA	AA	AA	AA	AA	AA	AA
SSL2.50ch01_18405166	C	A	AA	CC	CC	CC	CC	CC	CC	CC	CC	CC	CC	CC	CC	CC	CC	CC	CC	CC	CC	CC	CC	CC	CC	CC	CA	CC	CC	CA	CC	CC	CC	CC	CC	CC	CC	CC	AA	AA	CC	CC	CC	CC	CC	CC	CC	CC	CC
SSL2.50ch01_18405218	C	A	AA	CC	CC	AA	AA	AA	CC	AA	AA	AA	AA	AA	AA	AA	CA	CC	CC	CC	AA	CC	AA	CC	CC	CC	CA	CC	AA	CA	CC	CC	CC	CC	CC	CC	AA	AA	AA	AA	AA	AA	CC	AA	CC	CC	CC	AA	CC
SSL2.50ch01_18405327	A	G	GG	AA	AA	GG	GG	GG	AA	GG	GG	GG	GG	GG	GG	GG	AG	AA	AA	AA	GG	AA	GG	AA	AA	AA	AG	AA	GG	AG	AA	AA	AA	AA	AA	AA	GG	GG	GG	GG	GG	GG	AA	GG	AA	AA	AA	GG	AA
SSL2.50ch01_19076199	A	G	AA	GA	NN	AA	AA	AA	GA	AA	AA	AA	AA	AA	AA	AA	GG	GG	GG	GG	AA	GA	NN	GG	GG	GG	GA	GA	AA	GA	GG	GG	GG	GG	GA	GG	AA	AA	AA	AA	AA	AA	GG	AA	GG	GG	GG	AA	GG
SSL2.50ch01_19076242	C	T	CC	CC	NN	CT	CT	NN	CT	CC	CC	CC	CC	NN	CC	CC	CC	CC	CC	CC	CC	CT	NN	NN	CC	CC	CC	CT	NN	CT	CC	CC	CC	NN	NN	CC	CC	CC	CC	CT	CT	CC	CC	CT	CT	CC	CC	CC	CC
SSL2.50ch01_19076243	G	A	GG	GG	NN	GG	GG	NN	GG	AA	AA	AA	GG	NN	AA	AA	GG	GG	GG	GG	AA	GG	NN	NN	GG	GG	GG	GG	GG	GG	GG	GG	GG	NN	GG	GG	GG	GG	GG	GG	GG	GG	GG	GG	GG	GG	GG	GG	GG
SSL2.50ch01_19076299	G	A	GG	GG	NN	AG	AG	NN	AG	GG	GG	GG	GG	NN	GG	GG	GG	GG	GG	GG	GG	AG	NN	NN	GG	GG	GG	AG	NN	AG	GG	GG	GG	NN	NN	GG	GG	GG	GG	AG	AG	GG	GG	AG	AG	GG	GG	GG	GG
SSL2.50ch01_19076304	A	G	AA	AA	NN	AG	AG	NN	AG	AA	AA	AA	AA	NN	AA	AA	AA	AA	AA	AA	AA	AG	NN	NN	AA	AA	AA	AG	NN	AG	AA	AA	AA	NN	NN	AA	AA	AA	AA	AG	AG	AA	AA	AG	AG	AA	AA	AA	AA
SSL2.50ch01_19076321	A	C	AA	AA	NN	AC	AC	NN	AC	AA	AA	AA	AA	NN	AA	AA	AA	AA	AA	AA	AA	AC	NN	NN	AA	AA	AA	AC	NN	AC	AA	AA	AA	NN	NN	AA	AA	AA	AA	AC	AC	AA	AA	AC	AC	AA	AA	AA	AA
SSL2.50ch01_20761732	G	A	GG	GG	GG	GG	GG	AA	GG	AA	AA	AA	GG	AA	AA	AA	AG	GG	AG	AA	AA	GG	AA	GG	GG	GG	GG	GG	GG	GG	GG	NN	GG	GG	GG	GG	AG	GG	GG	GG	GG	GG	GG	GG	GG	GG	GG	AA	GG
SSL2.50ch01_21231906	G	A	GG	GG	GG	GG	AA	GG	GG	GG	GG	GG	GG	GG	GG	GG	GG	GG	GG	GG	GG	GG	GG	GG	GG	GG	GG	GG	GG	GG	GG	GG	GG	GG	GG	GG	GG	GG	GG	GG	GG	GG	GG	GG	GG	GG	GG	GG	GG
SSL2.50ch01_21231927	G	T	GG	GG	GG	GG	GG	GG	GG	GG	GG	GG	GG	GG	GG	GG	GG	GG	TT	GG	GG	GG	GG	GG	GG	GG	GG	GG	GG	GG	GG	GG	GG	GG	GG	GG	GG	GG	GG	GG	GG	GG	GG	GG	GG	GG	GG	GG	GG
SSL2.50ch01_21232013	C	T	CC	CC	CC	TT	CC	CC	CC	CC	CC	CC	CC	CC	CC	CC	CC	CC	CC	CC	CC	CC	CC	NN	CC	NN	CC	NN	NN	CC	NN	NN	NN	CC	NN	NN	TT	TT	CC	CC	CC	CC	CC	TT	CC	CC	CC	CC	CC
SSL2.50ch01_21314165	T	G	TT	TT	TT	TT	TT	GG	TT	GG	GG	GG	TT	GG	GG	GG	TG	TT	TG	GG	GG	TT	GG	TT	TT	TT	TT	TT	TT	TT	TT	TT	TT	TT	NN	TT	TT	TT	TT	TT	TT	TT	TT	TT	TT	TT	TT	NN	TT
SSL2.50ch01_21314184	A	G	GG	AA	AA	GG	GG	AA	AA	AA	AA	AA	GG	AA	AA	AA	AA	AA	AA	AA	AA	AA	AA	AA	AA	AA	GA	AA	GG	GA	AA	AA	AA	AA	NN	AA	GG	GG	GG	GG	GG	GG	AA	GG	AA	AA	AA	NN	AA
SSL2.50ch01_21314322	A	G	AA	AA	AA	AA	AA	AG	AA	AG	GG	AG	AA	AG	GG	GG	AA	AA	AA	AA	AA	AA	AA	AA	AA	AA	AA	AA	AA	AA	AA	AA	AA	AA	AA	AA	AA	AA	AA	AA	AA	AA	AA	AA	AA	AA	AA	NN	AA
SSL2.50ch01_21397188	A	T	AA	AA	AA	AA	AA	TT	AA	TT	TT	TT	AA	TT	TT	TT	TA	NN	TA	TT	TT	AA	TT	AA	AA	AA	AA	AA	AA	AA	AA	AA	AA	AA	AA	AA	AA	AA	AA	AA	AA	AA	AA	AA	AA	AA	AA	AA	AA
SSL2.50ch01_21662195	A	G	AA	NN	AA	AA	AA	GG	AA	GG	GG	GG	AA	GG	GG	GG	AG	NN	NN	NN	GG	AA	GG	AA	AA	AA	AA	AA	AA	NN	NN	NN	AA	AA	AA	AA	AA	AA	AA	AA	AA	AA	NN	AA	AA	AA	NN	GG	AA
SSL2.50ch01_22128374	A	G	AA	AA	NN	AA	AA	NN	AA	GG	GG	AG	AA	NN	GG	GG	AA	NN	AG	GG	GG	AA	AA	AA	AA	AA	AA	AA	AA	AA	NN	NN	AA	AA	AA	AA	AA	AA	AA	AA	AA	AA	AA	AA	AA	AA	AA	AA	AA
SSL2.50ch01_23238495	C	A	AA	AA	AA	AA	AA	CC	CC	CC	CC	CC	AA	CC	CC	CC	AC	AA	CC	CC	CC	CC	CC	CC	AA	CC	AC	AA	AA	AC	AA	CC	AA	CC	AA	CC	AA	AA	AA	AA	AA	AA	AA	AA	CC	AA	CC	CC	CC
SSL2.50ch01_23238503	G	A	GG	GG	GG	GG	GG	GG	AA	GG	GG	GG	GG	GG	GG	GG	GG	GG	GG	GG	GG	AA	GG	AA	GG	GG	AG	GG	GG	AG	GG	AA	GG	AA	GG	GG	GG	GG	GG	GG	GG	GG	GG	GG	GG	GG	AA	GG	AA
SSL2.50ch01_23238567	G	A	GG	GG	GG	GG	GG	AA	GG	AA	AA	AA	GG	AA	AA	AA	GG	GG	AA	AA	AA	GG	GG	GG	GG	GG	GG	GG	GG	GG	GG	GG	GG	GG	GG	GG	GG	GG	GG	GG	GG	GG	GG	GG	GG	GG	GG	GG	GG
SSL2.50ch01_23243330	A	G	NN	AA	AA	AA	AA	AA	AA	GG	GG	GG	AA	GG	GG	GG	AA	AA	NN	GG	GG	AA	AA	AA	AA	NN	AA	NN	AA	NN	AA	AA	AA	AA	NN	AA	AA	AA	AA	NN	AA	AA	AA	NN	AA	AA	AA	AA	AA
SSL2.50ch01_23243337	G	A	NN	GG	GG	GG	GG	AA	GG	AA	AA	AA	GG	AA	AA	AA	AG	GG	NN	AA	AA	GG	AA	GG	GG	NN	GG	NN	GG	NN	GG	GG	GG	GG	NN	GG	GG	GG	GG	NN	GG	GG	GG	NN	GG	GG	GG	AA	GG
SSL2.50ch01_23243344	C	T	NN	TT	TT	TT	TT	CC	CC	CC	CC	CC	TT	CC	CC	CC	CT	TT	NN	CC	CC	CC	CC	CC	TT	NN	CT	NN	TT	NN	TT	CC	TT	CC	NN	CC	TT	TT	TT	NN	TT	TT	TT	NN	CC	TT	CC	CC	CC
SSL2.50ch01_23243369	G	C	NN	GG	GG	GG	GG	GG	CC	GG	GG	GG	GG	GG	GG	GG	GG	GG	NN	GG	GG	CC	GG	CC	GG	NN	CG	NN	GG	NN	GG	CC	GG	CC	NN	GG	GG	GG	GG	NN	GG	GG	GG	NN	GG	GG	CC	GG	CC
SSL2.50ch01_26017005	C	A	CC	CC	CC	CC	CC	CA	CC	AA	AA	NN	CC	AA	AA	AA	CC	CC	CC	CC	CC	CC	CC	CC	CC	CC	CC	CC	CC	CC	CC	CC	CC	CC	CC	CC	CC	CC	CC	CC	CC	CC	CC	CC	CC	CC	CC	CC	CC
SSL2.50ch01_26085266	G	T	GG	GG	GG	GG	GG	GG	TT	GG	NN	NN	GG	GG	GG	NN	GG	NN	GT	GG	GG	TT	GG	TT	GG	GG	GT	GG	NN	TT	GG	TT	GG	TT	GG	GG	GG	GG	GG	GG	GG	GG	GG	GG	GG	GG	TT	GG	TT
SSL2.50ch01_26883896	A	G	AA	AA	AA	AA	AA	AA	GG	AA	AA	AA	AA	AA	AA	AA	AA	AA	AA	AA	AA	AA	AA	AA	AA	NN	AA	AA	AA	GA	GA	AA	AA	NN	AA	AA	AA	AA	AA	AA	AA	AA	AA	AA	AA	AA	GG	AA	GG
SSL2.50ch01_27410049	G	A	GG	GG	GG	GG	GG	GG	GG	GG	GG	GG	GG	NN	NN	GG	GG	GG	GG	GG	GG	GG	GG	GG	GG	GG	GG	GG	GG	NN	GG	GG	GG	GG	NN	GG	GG	GG	GG	GG	GG	GG	GG	GG	GG	GG	GG	GG	GG
SSL2.50ch01_27531738	T	G	TT	TT	TT	TT	TT	GG	TT	GG	NN	GG	TT	GG	GG	GG	TG	TT	GG	GG	GG	TT	GG	TT	TT	TT	TT	TT	NN	TT	TG	NN	TT	TT	TT	TT	TT	TT	TT	TT	TT	TT	NN	TT	TT	TT	TT	TT	TT
SSL2.50ch01_27537723	T	C	CC	TT	TT	CC	CC	TT	TT	TT	NN	TT	CC	TT	TT	TT	TT	TT	TT	TT	TT	NN	TT	TT	TT	TT	TC	TT	NN	TC	TT	NN	NN	TT	TT	TT	CC	CC	CC	CC	TT	TT	NN	TC	TT	TT	TT	NN	TT
SSL2.50ch01_27537874	A	G	AA	GG	GG	AA	AA	AA	AA	NN	NN	AA	AA	AA	AA	AA	AG	GG	AA	AA	NN	NN	AA	NN	GG	AA	AA	GG	GG	AA	GG	AA	NN	AA	GG	AA	AA	AA	NN	AA	GG	GG	NN	AA	AA	GG	AA	NN	AA
SSL2.50ch01_27953685	C	T	TT	CC	CC	TT	TT	CC	CC	CC	CC	CC	TT	CC	CC	CC	CC	CC	TT	TT	CC	CC	CC	CC	CC	CC	TC	CC	CC	TC	CC	CC	CC	CC	CC	CC	TC	TT	TT	TT	CC	CC	CC	TT	CC	CC	CC	CC	CC
SSL2.50ch01_27956732	C	T	CC	CC	CC	CC	CC	TT	CC	TT	TT	TC	CC	TT	TT	TT	TC	CC	CC	CC	TT	CC	TT	CC	CC	CC	CC	CC	CC	CC	CC	CC	CC	CC	CC	NN	CC	CC	CC	CC	CC	CC	CC	CC	NN	CC	CC	CC	CC
SSL2.50ch01_27975198	G	A	GG	AA	GG	GG	GG	AA	GG	AA	AA	AA	GG	AA	AA	AA	AA	AA	GG	GG	AA	GG	AA	GG	GG	GG	GG	GG	GG	GG	AA	GG	AA	GG	GG	GG	GG	GG	GG	GG	GG	GG	AA	GG	GG	GG	GG	GG	GG
SSL2.50ch01_28431402	C	T	CC	NN	CC	TT	CC	CC	NN	NN	CC	CC	CC	CC	CC	CC	CC	CC	CC	CC	CC	CC	CC	NN	CC	NN	CC	CC	CC	CC	CC	NN	CC	CC	CC	NN	TT	TT	CC	CC	CC	CC	NN	TT	TT	CC	NN	CC	CC
SSL2.50ch01_28431412	G	C	GG	NN	GG	CC	GG	CG	NN	NN	CC	CG	GG	CC	CC	CC	GG	GG	GG	GG	CC	GG	GG	NN	GG	NN	GG	GG	GG	GG	GG	NN	GG	GG	GG	NN	CC	CC	GG	GG	GG	GG	NN	CC	CC	GG	NN	GG	GG
SSL2.50ch01_29094074	T	A	TT	TT	TT	TT	TT	AA	NN	AA	AA	AA	TT	AA	TA	AA	TT	TT	TT	TT	TT	NN	TT	TT	TT	NN	TT	TT	TT	TT	TT	TT	TT	TT	NN	TT	TT	TT	TT	TT	TT	TT	TT	TT	TT	TT	TT	TT	TT
SSL2.50ch01_29566354	C	A	CC	CC	CC	CC	CC	CA	CC	AA	AA	CA	CC	AA	AA	AA	CC	CC	CC	CC	CC	CC	CC	CC	CC	CC	CC	CC	CC	CC	CC	CC	CC	CC	CC	CC	CC	CC	CC	CC	CC	CC	CC	CC	CC	CC	CC	CC	CC
SSL2.50ch01_29566378	G	A	GG	GG	GG	GG	GG	AG	GG	AA	AA	AG	GG	AA	AA	AA	GG	GG	GG	GG	GG	GG	GG	GG	GG	GG	GG	GG	GG	GG	GG	GG	GG	GG	GG	GG	GG	GG	GG	GG	GG	GG	GG	GG	GG	GG	GG	GG	GG
SSL2.50ch01_29620972	G	T	GG	GG	GG	GG	GG	TG	GG	TT	TT	TG	GG	TT	TT	TT	GG	GG	GG	GG	GG	GG	GG	GG	GG	GG	GG	GG	GG	GG	GG	NN	GG	GG	GG	GG	GG	GG	GG	GG	GG	GG	GG	GG	GG	GG	GG	GG	GG
SSL2.50ch01_29621027	A	T	AA	AA	AA	AA	AA	AA	AA	AA	AA	AA	AA	AA	AA	AA	AA	AA	AA	AA	AA	AA	AA	AA	AA	AA	AA	AA	AA	AA	AA	NN	AA	AA	AA	AA	AA	AA	AA	AA	AA	AA	AA	AA	AA	AA	AA	AA	AA
SSL2.50ch01_29834920	C	A	CC	CC	CC	AA	CC	CC	CC	CC	CC	CC	CC	CC	CC	CC	CC	NN	CC	CC	CC	CC	CC	CC	CC	AA	CC	CC	CC	CC	CC	CC	CC	CC	CC	CC	AA	AA	CC	CC	CC	CC	CC	AA	AA	CC	CC	CC	CC
SSL2.50ch01_29910211	T	C	TT	TT	TT	CC	TT	TT	TT	TT	NN	TT	TT	TT	NN	TT	TT	TT	TT	NN	CC	TT	TT	TT	TT	CC	TT	TT	TT	TT	NN	TT	TT	TT	TT	TT	CC	CC	TT	TT	TT	TT	TT	CC	CC	TT	TT	TT	TT
SSL2.50ch01_29910214	A	C	AA	AA	AA	AA	AA	CC	AA	CC	NN	CA	AA	CC	NN	CC	AA	AA	AA	NN	AA	AA	AA	AA	AA	AA	AA	AA	AA	AA	NN	AA	AA	AA	AA	AA	AA	AA	AA	AA	AA	AA	AA	AA	AA	AA	AA	AA	AA
SSL2.50ch01_29910306	C	A	CC	CC	CC	CC	CC	AA	CC	AA	AA	AC	CC	AA	NN	AA	CC	CC	CC	NN	NN	NN	CC	NN	CC	CC	CC	CC	CC	CC	NN	CC	CC	CC	CC	CC	NN	CC	CC	CC	CC	CC	CC	CC	CC	CC	CC	CC	CC
SSL2.50ch01_30473745	A	T	AA	AA	AA	AA	AA	AA	AA	TT	TT	TT	AA	TT	TT	TT	AA	NN	AA	AA	AA	NN	AA	AA	NN	AA	AA	AA	AA	AA	AA	NN	AA	NN	AA	AA	AA	AA	AA	AA	AA	AA	NN	AA	AA	AA	AA	AA	AA
SSL2.50ch01_32596706	A	T	AA	AA	AA	AA	AA	TA	AA	TT	TT	TA	AA	TT	TT	TT	AA	AA	AA	AA	AA	NN	AA	AA	AA	AA	AA	AA	AA	AA	AA	AA	AA	AA	AA	AA	AA	AA	AA	AA	AA	AA	AA	AA	AA	AA	AA	AA	AA
SSL2.50ch01_32596737	T	C	TT	TT	TT	CC	TT	CC	CC	CC	CC	CC	TT	CC	CC	CC	TC	TT	TT	TT	CC	NN	CC	CC	TT	CC	TT	TT	TT	TC	TT	TT	TT	CC	TT	TT	CC	CC	TT	TT	TT	TT	TT	CC	CC	TT	CC	TT	CC
SSL2.50ch01_32679005	A	G	AA	AA	AA	AA	AA	AA	GG	AA	AA	AA	AA	NN	NN	AA	AA	AA	AA	AA	AA	GG	AA	GG	AA	AA	AA	AA	AA	GA	AA	AA	AA	GG	AA	AA	AA	AA	AA	AA	AA	AA	AA	AA	AA	AA	GG	AA	GG
SSL2.50ch01_32729617	C	T	CC	CC	CC	CC	CC	CC	CC	CC	CC	CC	CC	CC	CC	CC	CC	CC	CC	CC	CC	TT	CC	CC	CC	CC	CC	CC	CC	CC	CC	CC	CC	TT	CC	CC	CC	CC	CC	CC	CC	CC	CC	CC	CC	CC	CC	CC	CC
SSL2.50ch01_32772471	G	A	GG	GG	GG	GG	GG	GA	GG	AA	AA	GA	GG	AA	AA	AA	GG	GG	GG	GG	GG	GG	GG	GG	GG	GG	GG	GG	GG	GG	GG	GG	GG	GG	GG	GG	GG	GG	GG	GG	GG	GG	GG	GG	GG	GG	GG	GG	GG
SSL2.50ch01_32773348	T	A	TT	TT	TT	TT	TT	NN	TT	AA	AA	AA	TT	AA	AA	AA	TT	NN	TT	TT	TT	TT	TT	NN	TT	TT	TT	TT	TT	TT	NN	TT	TT	TT	TT	TT	TT	TT	TT	TT	TT	TT	TT	TT	TT	TT	TT	TT	TT
SSL2.50ch01_32853465	G	A	GG	GG	GG	GG	GG	GA	GG	AA	AA	GA	GG	AA	AA	AA	GG	GG	GG	GG	GG	GG	GG	GG	GG	GG	GG	GG	GG	GG	GG	GG	GG	GG	NN	GG	GG	GG	GG	GG	GG	GG	GG	GG	GG	GG	GG	GG	GG
SSL2.50ch01_32853510	G	T	GG	GG	GG	TT	GG	TT	GG	TT	TT	TT	GG	TT	TT	TT	GT	GG	GG	GG	TT	GG	TT	GG	GG	TT	GG	GG	GG	GG	GG	GG	GG	GG	GG	GG	TT	TT	GG	GG	GG	GG	GG	TT	TT	GG	GG	GG	GG
SSL2.50ch01_35355050	C	A	CC	CC	CC	NN	CC	AC	CC	NN	AA	CC	CC	AA	NN	NN	CC	CC	CC	CC	CC	CC	NN	CC	CC	CC	CC	CC	CC	CC	CC	CC	CC	CC	CC	CC	CC	CC	NN	CC	CC	CC	CC	CC	CC	CC	CC	CC	CC
SSL2.50ch01_39131536	T	G	TT	TG	TG	TG	TT	TT	TG	TT	TT	TG	TT	NN	NN	NN	TT	TT	TT	TT	TT	TG	TT	TG	TG	TG	TT	TT	TG	TT	TT	TT	TT	TT	TT	TT	TG	NN	TT	TG	TG	TG	TG	TG	TG	TG	TT	TT	TT
SSL2.50ch01_39131558	T	C	TT	TC	TC	TT	TT	TT	TC	TT	TT	TC	TT	NN	NN	NN	TT	TT	TT	TT	TT	TC	TT	TC	TC	TT	TT	TT	TC	TT	TT	TC	TT	TT	TT	TC	TC	TT	TT	TC	TC	TC	TC	TC	TC	TC	TT	TT	TC
SSL2.50ch01_39131560	G	A	GG	GA	GA	GG	GG	GG	GA	GG	GG	GA	GG	NN	NN	NN	GG	GG	GG	GG	GG	GA	GG	GA	GA	GG	GG	GG	GA	GG	GG	GA	GG	GG	GG	GA	GA	GG	GG	GA	GA	GA	GA	GA	GA	GA	GG	GG	GA
SSL2.50ch01_39131561	G	A	GG	GA	GA	GG	GG	GG	GA	GG	GG	GA	GG	NN	NN	NN	GG	GG	GG	GG	GG	GA	GG	GA	GA	GG	GG	GG	GA	GG	GG	GA	GG	GG	GG	GA	GA	GG	GG	GA	GA	GA	GA	GA	GA	GA	GG	GG	GA
SSL2.50ch01_39131563	C	A	CC	CA	CA	CA	CC	CC	CA	CC	CC	CC	CC	NN	NN	NN	CC	CC	CC	CC	CA	CA	CC	CA	CA	CA	CC	CC	CA	CC	CC	CA	CC	CC	CC	CA	CA	CA	CC	CA	CA	CA	CA	CA	CA	CA	CC	CC	CA
SSL2.50ch01_39131570	C	T	TC	CC	CC	TC	CC	CC	TC	TT	CC	CC	CC	NN	NN	NN	CC	TC	CC	TC	CC	TC	TC	TC	CC	TC	CC	TC	TC	TC	TC	CC	TC	TC	TC	TC	TC	CC	TC	CC	TC	CC	TC	TC	TC	NN	TC	TC	TC
SSL2.50ch01_39131576	C	T	CC	TC	TC	TC	CC	CC	TC	CC	CC	TC	CC	NN	NN	NN	CC	NN	TC	CC	CC	TC	CC	TC	TC	CC	CC	CC	TC	CC	TC	TC	TC	TC	CC	TC	TC	CC	CC	TC	TC	TC	TC	TC	TC	TC	CC	CC	TC
SSL2.50ch01_39131590	C	T	CC	CC	CC	CC	CC	CC	TC	CC	CC	NN	CC	NN	NN	NN	CC	CC	CC	CC	TC	CC	CC	TC	TC	TC	CC	CC	CC	CC	CC	TC	CC	CC	CC	CC	TC	CC	CC	CC	CC	TC	TC	TC	TC	CC	CC	CC	CC
SSL2.50ch01_39131626	A	G	AA	AG	AG	AA	AA	AG	AA	NN	NN	AG	AA	NN	NN	NN	AG	AG	AG	AG	AG	AA	AG	AA	AA	NN	AA	AG	AA	AG	AA	AG	AA	AG	AA	AG	AA	AG	AA	AA	NN	AA	AG	AG	AG	AA	AA	AA	AA
SSL2.50ch01_39131633	C	A	CC	CC	AC	CC	CC	AC	CC	NN	NN	CC	CC	NN	NN	NN	CC	AC	AC	CC	CC	CC	AC	CC	CC	CC	CC	CC	CC	CC	CC	AC	CC	CC	CC	AC	CC	CC	CC	CC	CC	CC	CC	AC	AC	CC	CC	CC	CC
SSL2.50ch01_39131636	C	T	CT	CC	CC	CT	CT	CC	CT	NN	NN	CT	CT	NN	NN	NN	CC	CC	CT	CT	CT	CC	CC	CC	CC	CC	CT	CC	CC	CC	CT	CC	CC	CT	CC	CT	CT	NN	CT	CT	CC	CC	CC	CT	CC	CT	CC	CT	CC
SSL2.50ch01_39131656	C	T	CC	CT	CT	CC	CC	CT	CC	NN	NN	CT	CC	NN	NN	NN	CT	CT	CT	CT	CT	CC	CT	CC	CC	NN	CC	CT	CC	CT	CC	CT	CC	CT	CC	CT	CC	CT	CC	CC	NN	CC	CT	CT	CT	CC	CC	CC	CC
SSL2.50ch01_39131682	C	A	AC	AC	AC	AC	AC	AC	CC	NN	NN	AC	AC	NN	NN	NN	CC	NN	CC	AC	CC	AC	CC	AC	AC	NN	CC	CC	AC	AC	AC	CC	AC	AC	CC	AC	AC	AC	AC	AC	AC	AC	AC	CC	AC	AC	AC	CC	AC
SSL2.50ch01_39131690	G	A	AG	AG	AG	AG	AG	AG	GG	NN	NN	AG	AG	NN	NN	NN	NN	NN	GG	AG	GG	AG	GG	AG	AG	AG	NN	GG	AG	AG	AG	AG	AG	AG	GG	AG	AG	AG	AG	AG	AG	AG	AG	GG	AG	AG	AG	GG	AG
SSL2.50ch01_39131702	G	A	GG	AG	AG	GG	GG	AG	GG	NN	NN	AG	GG	NN	NN	NN	AG	AG	AG	AG	AG	GG	AG	GG	GG	NN	GG	AG	GG	AG	NN	AG	GG	AG	GG	AG	GG	AG	GG	GG	AG	AG	AG	AG	AG	GG	GG	GG	GG
SSL2.50ch01_39131706	G	A	GG	GG	GG	AG	GG	GG	AG	NN	NN	GG	AG	NN	NN	NN	GG	GG	AG	GG	GG	GG	GG	GG	GG	GG	GG	GG	GG	GG	GG	GG	GG	AG	GG	GG	GG	GG	AG	GG	GG	GG	GG	AG	GG	GG	AG	AG	GG
SSL2.50ch01_39925319	T	C	TT	TT	TT	CC	TT	TT	TT	TT	TT	TT	TT	TT	TT	TT	TT	TT	TT	TT	TT	TT	TT	TT	TT	CC	TT	TT	TT	TT	TT	TT	TT	TT	TT	TT	CC	CC	TT	TT	TT	TT	TT	CC	CC	TT	TT	TT	TT
SSL2.50ch01_39925354	A	G	AA	AA	AA	GG	AA	AA	AA	AA	AA	AA	AA	AA	AA	AA	AA	AA	AA	AA	GG	AA	AA	AA	AA	GG	AA	AA	AA	AA	AA	AA	AA	AA	AA	AA	GG	GG	AA	AA	AA	AA	AA	GG	GG	AA	AA	AA	AA
SSL2.50ch01_39925369	C	G	CC	CC	CC	CC	CC	GC	CC	GG	GG	GC	CC	GG	GG	GG	CC	CC	CC	CC	CC	CC	CC	CC	CC	CC	CC	CC	CC	CC	CC	CC	CC	CC	CC	CC	CC	CC	CC	CC	CC	CC	CC	CC	CC	CC	CC	CC	CC
SSL2.50ch01_39932571	C	A	CC	CC	CC	AA	CC	CC	CC	CC	CC	CC	CC	CC	CC	CC	CC	CC	CC	CC	CC	CC	CC	CC	CC	AA	CC	CC	CC	CC	CC	CC	CC	CC	CC	CC	AA	AA	CC	CC	CC	CC	CC	AA	AA	CC	CC	CC	CC
SSL2.50ch01_39932601	A	T	AA	AA	AA	AA	AA	AA	AA	TT	TT	TA	AA	TT	TT	TT	AA	AA	AA	AA	AA	AA	AA	AA	AA	AA	AA	AA	AA	AA	AA	AA	AA	AA	AA	AA	AA	AA	AA	AA	AA	AA	AA	AA	AA	AA	AA	AA	AA
SSL2.50ch01_39935335	A	T	AA	TT	TT	AA	AA	AA	AA	AA	AA	AA	AA	AA	AA	NN	TA	TT	AA	AA	AA	AA	AA	AA	TT	AA	AA	TT	TT	AA	TT	AA	TT	AA	TT	AA	AA	AA	AA	AA	TT	TT	TT	AA	AA	TT	AA	AA	AA
SSL2.50ch01_39935374	T	C	TT	TT	TT	TT	TT	TC	TT	CC	CC	TT	TT	CC	CC	NN	TT	TT	TT	TT	TT	TT	TT	TT	TT	TT	TT	TT	TT	TT	TT	TT	TT	TT	TT	TT	TT	TT	TT	TT	TT	TT	TT	TT	TT	TT	TT	TT	TT
SSL2.50ch01_40840786	A	C	AA	AA	AA	AA	AA	AA	AA	AA	AA	AA	AA	AA	AA	AA	AA	AA	AA	AA	AA	CC	AA	AA	AA	AA	AA	AA	AA	AA	AA	AA	AA	CC	AA	AA	AA	AA	AA	AA	AA	AA	AA	AA	AA	AA	AA	AA	AA
SSL2.50ch01_40842353	C	T	CC	CC	CC	CC	CC	CT	CC	TT	TT	CT	CC	TT	TT	TT	CC	CC	CC	CC	CC	CC	CC	CC	CC	CC	CC	CC	CC	CC	CC	CC	CC	CC	CC	CC	CC	CC	CC	CC	CC	CC	CC	CC	CC	CC	CC	CC	CC
SSL2.50ch01_41112731	A	G	AA	AA	AA	AA	AA	GA	AA	GG	GG	GA	AA	GG	GG	GG	AA	AA	AA	AA	AA	AA	AA	AA	AA	AA	AA	AA	AA	AA	AA	AA	AA	AA	AA	AA	AA	AA	AA	AA	AA	AA	AA	AA	AA	AA	AA	AA	AA
SSL2.50ch01_41234421	G	T	GG	GG	GG	TT	GG	GG	GG	GG	GG	GG	GG	GG	GG	GG	GG	GG	GG	GG	GG	GG	GG	GG	GG	TT	GG	GG	GG	GG	GG	GG	GG	GG	GG	GG	TT	TT	GG	GG	GG	GG	GG	TT	TT	GG	GG	GG	GG
SSL2.50ch01_41234490	G	A	GG	GG	GG	GG	GG	AG	GG	AA	AA	AG	GG	AA	AA	AA	GG	GG	GG	GG	GG	GG	GG	GG	GG	GG	GG	GG	GG	GG	GG	GG	GG	GG	GG	GG	GG	GG	GG	GG	GG	GG	GG	GG	GG	GG	GG	GG	GG
SSL2.50ch01_41234551	T	A	TT	TT	AA	TT	TT	TT	TT	TT	TT	TT	TT	TT	TT	TT	TT	TT	TT	TT	TT	TT	TT	TT	TT	TT	TT	AA	TT	TT	TT	TT	TT	TT	AA	TT	TT	TT	TT	TT	TT	TT	TT	TT	TT	TT	TT	TT	TT
SSL2.50ch01_41234559	A	G	AA	GG	GG	AA	AA	AA	AA	AA	AA	AA	AA	AA	AA	AA	AA	GG	AA	AA	AA	AA	AA	AA	GG	AA	AA	GG	GG	AA	GG	AA	GG	AA	GG	AA	AA	AA	AA	AA	GG	GG	GG	AA	AA	GG	AA	AA	AA
SSL2.50ch01_41412322	T	G	TT	TT	NN	TT	TT	NN	TT	GG	NN	TG	TT	GG	GG	GG	TT	TT	TT	TT	TT	TT	TT	NN	TT	NN	NN	TT	TT	TT	TT	TT	TT	TT	TT	NN	TT	NN	TT	TT	TT	TT	TT	TT	TT	TT	TT	TT	TT
SSL2.50ch01_41412358	A	T	AA	AA	NN	AA	AA	NN	AA	TT	NN	TA	AA	TT	TT	TT	AA	AA	AA	AA	AA	AA	AA	NN	AA	NN	NN	AA	AA	AA	AA	AA	AA	AA	AA	NN	AA	NN	AA	AA	AA	AA	AA	AA	AA	AA	AA	AA	AA
SSL2.50ch01_42569600	G	T	GG	TG	TG	NN	TG	GG	GG	NN	NN	GG	TT	GG	GG	NN	TG	GG	TG	GG	TG	TG	GG	GG	NN	TG	GG	NN	GG	TG	GG	TG	TG	GG	NN	NN	GG	TT	GG	TG	GG	TG	GG	TG	NN	NN	TG	GG	GG
SSL2.50ch01_42569625	A	T	AA	AA	TA	NN	AA	AA	AA	AA	NN	NN	AA	TA	AA	NN	AA	AA	TA	AA	TA	AA	TA	AA	TA	AA	AA	TA	TA	AA	AA	AA	AA	AA	NN	NN	AA	AA	TA	AA	AA	TA	AA	TA	NN	NN	TA	AA	TA
SSL2.50ch01_42656638	G	A	AG	GG	GG	GG	GG	GG	GG	GG	GG	GG	GG	GG	GG	GG	GG	AG	NN	GG	GG	GG	GG	AG	GG	GG	GG	GG	AG	GG	GG	GG	AG	GG	GG	GG	GG	GG	GG	GG	GG	GG	GG	GG	GG	GG	GG	NN	GG
SSL2.50ch01_42993929	G	T	GG	GG	GG	NN	GG	GG	GG	GG	GG	GG	GG	GG	GG	GG	GG	GG	GG	GG	TT	GG	GG	GG	GG	TT	GG	GG	GG	GG	GG	GG	GG	NN	GG	GG	TT	TT	GG	GG	GG	GG	GG	TT	TT	GG	GG	GG	GG
SSL2.50ch01_42993944	A	G	AA	AA	AA	NN	AA	GA	AA	GG	GG	GA	AA	GG	GG	GG	AA	AA	AA	AA	AA	AA	AA	AA	AA	AA	AA	AA	AA	AA	AA	AA	AA	NN	AA	AA	AA	AA	AA	AA	AA	AA	AA	AA	AA	AA	AA	AA	AA
SSL2.50ch01_43017160	A	T	AA	AA	AA	NN	AA	AA	TT	AA	AA	AA	AA	NN	AA	AA	AA	AA	AA	AA	NN	TT	AA	TT	AA	AA	AA	AA	AA	TT	NN	AA	AA	TT	AA	AA	AA	AA	AA	AA	AA	AA	AA	AA	AA	AA	TT	AA	TT
SSL2.50ch01_43100298	T	G	TT	TT	TT	GG	TT	GG	TT	GG	GG	GG	TT	GG	GG	GG	GT	TT	TT	TT	GG	TT	GG	TT	TT	GG	TT	TT	TT	TT	TT	TT	TT	TT	TT	TT	GG	GG	TT	TT	TT	TT	TT	GG	GG	TT	TT	TT	TT
SSL2.50ch01_43100301	T	C	TT	TT	TT	TT	TT	CT	TT	CC	CC	CT	TT	CC	CC	CC	TT	TT	TT	TT	TT	TT	TT	TT	TT	TT	TT	TT	TT	TT	TT	TT	TT	TT	TT	TT	TT	TT	TT	TT	TT	TT	TT	TT	TT	TT	TT	TT	TT
SSL2.50ch01_43100322	T	A	TT	TT	TT	TT	TT	AT	TT	AA	AA	AT	TT	AA	AA	AA	TT	TT	TT	TT	TT	TT	TT	TT	TT	TT	TT	TT	TT	TT	TT	TT	TT	TT	TT	TT	TT	TT	TT	TT	TT	TT	TT	TT	TT	TT	TT	TT	TT
SSL2.50ch01_43334965	T	C	TT	TT	TT	TT	TT	TC	TT	CC	CC	TC	TT	CC	CC	CC	TT	TT	TT	TT	TT	TT	TT	TT	TT	TT	TT	TT	TT	TT	TT	TT	TT	TT	TT	TT	TT	TT	TT	TT	TT	TT	TT	TT	TT	TT	TT	TT	TT
SSL2.50ch01_43416682	A	G	AA	AA	AA	GG	AA	GG	AA	GG	NN	GG	AA	GG	GG	GG	AG	AA	AA	AA	GG	AA	GG	AA	AA	GG	AA	AA	AA	AA	AA	AA	AA	AA	NN	AA	GG	GG	AA	AA	AA	AA	AA	GG	GG	AA	AA	AA	AA
SSL2.50ch01_43416714	C	A	CC	CC	CC	CC	CC	CC	CC	CC	NN	CC	CC	CC	CC	CC	CC	CC	CC	CC	CC	AA	CC	CC	CC	CC	CC	CC	CC	CC	CC	CC	CC	AA	NN	CC	CC	CC	CC	CC	CC	CC	CC	CC	CC	CC	CC	CC	CC
SSL2.50ch01_43501197	G	T	GT	GG	GG	GG	GG	GG	NN	GG	GG	GG	GG	GG	GG	GG	GG	GG	GG	GG	GG	GG	GG	GG	GG	NN	GG	GG	GG	GG	NN	NN	GG	GG	GT	GG	GG	GG	GT	GG	GG	GG	GG	GG	GG	GG	GG	GG	GT
SSL2.50ch01_43501202	G	T	GG	GG	GG	GG	GG	GG	GG	GG	GG	GG	GG	GG	GG	GG	GG	GG	GG	GG	GT	GG	GG	GG	GG	NN	GG	GG	GG	GG	NN	GG	GG	GG	GT	GT	GT	GG	GG	GT	NN	GG	GG	GG	GT	GG	GT	GG	GG
SSL2.50ch01_43501248	G	A	GG	GG	AG	GG	GG	GG	GG	AG	GG	AG	GG	GG	GG	GG	NN	GG	GG	GG	AG	GG	AG	GG	AG	NN	AG	GG	GG	GG	NN	AG	GG	GG	GG	GG	AG	AG	NN	AG	AG	AG	GG	GG	AG	AG	AG	AG	GG
SSL2.50ch01_43501273	T	A	TT	TT	AT	TT	AA	AA	TT	TT	TT	AT	AT	AT	AT	AT	TT	TT	NN	TT	AT	AT	AT	TT	AT	NN	TT	TT	TT	NN	NN	TT	AA	TT	AT	AT	AT	TT	TT	AT	NN	TT	TT	TT	AT	TT	AT	TT	TT
SSL2.50ch01_43522251	G	T	GG	NN	GG	GG	TT	GG	NN	TT	GG	GG	GG	GG	GG	GG	GG	GG	GG	GG	GG	GG	GG	GG	NN	GG	GG	GG	GG	GG	GG	NN	GG	GG	GG	GG	GG	GG	GG	GG	GG	TT	GG	GG	GG	GG	GG	GT	GG
SSL2.50ch01_43522295	A	T	AA	NN	AA	AA	AA	NN	NN	AA	TT	AA	AT	AA	TT	AA	NN	AA	AA	AA	AA	AA	AT	AT	NN	AA	AA	AT	AA	AA	AA	NN	AA	AA	AA	AA	AA	AA	AA	AA	AA	AA	AA	AA	AA	AA	AA	AT	AA
SSL2.50ch01_43522316	A	G	AG	NN	AG	AG	GG	AA	NN	GG	AA	NN	AA	GG	AA	AA	AA	AA	AG	NN	GG	AG	AA	AA	NN	AA	AA	AA	NN	AA	AG	NN	AG	AA	AG	NN	AA	AA	AG	AG	AG	GG	AA	AA	AG	AA	AG	AG	AG
SSL2.50ch01_44191442	G	A	GG	GG	GG	GG	GG	GA	GG	AA	AA	GA	GG	AA	AA	AA	GG	GG	GG	GG	GG	GG	GG	GG	GG	GG	GG	GG	GG	GG	GG	GG	GG	GG	GG	GG	GG	GG	GG	GG	GG	GG	GG	NN	GG	GG	GG	GG	GG
SSL2.50ch01_44459573	G	A	NN	GG	GG	GG	NN	GA	GG	AA	AA	AA	GG	AA	AA	AA	GG	NN	GG	GG	GG	GG	GG	GG	GG	GG	GG	GG	GG	GG	GG	GG	GG	GG	NN	GG	GG	GG	GG	GG	GG	GG	GG	NN	GG	GG	GG	GG	GG
SSL2.50ch01_45995342	A	G	AA	AA	AA	GG	AA	GG	AA	GG	GG	GG	AA	GG	GG	NN	AA	AA	AA	AA	GG	AA	NN	AA	AA	GG	AA	AA	AA	AA	AA	AA	AA	AA	AA	NN	GG	GG	AA	AA	AA	AA	AA	GG	GG	AA	AA	AA	AA
SSL2.50ch01_45995366	G	T	GG	GG	GG	TT	GG	GG	GG	GG	GG	GG	GG	GG	GG	NN	GG	GG	GG	GG	TT	GG	NN	GG	GG	TT	GG	GG	GG	GG	GG	GG	GG	GG	GG	NN	TT	TT	GG	GG	GG	GG	GG	TT	TT	GG	GG	GG	GG
SSL2.50ch01_46847440	T	A	TT	TT	TT	TT	TT	NN	TT	AA	AA	TA	TT	AA	AA	AA	TT	TT	TT	TT	TT	TT	TT	TT	TT	TT	TT	TT	TT	TT	TT	TT	TT	TT	TT	TT	TT	TT	TT	TT	TT	TT	TT	TT	TT	TT	TT	TT	TT
SSL2.50ch01_46848418	G	C	NN	GG	GG	NN	GG	NN	GG	CC	CC	GC	GG	CC	CC	NN	GG	GG	GG	GG	GG	NN	GG	GG	GG	GG	GG	NN	GG	GG	GG	GG	GG	GG	GG	NN	GG	GG	GG	GG	NN	GG	GG	GG	NN	GG	GG	GG	GG
SSL2.50ch01_47507558	G	T	GG	GG	GG	GG	GG	TG	GG	TT	TT	TG	GG	TT	TT	TT	GG	GG	GG	GG	GG	GG	GG	GG	GG	GG	GG	GG	GG	GG	GG	GG	GG	GG	GG	GG	GG	GG	GG	GG	GG	GG	GG	GG	GG	GG	GG	GG	GG
SSL2.50ch01_47507609	C	G	CC	CC	CC	CC	CC	GC	CC	GG	GG	GC	CC	GG	GG	GG	CC	CC	CC	CC	CC	CC	CC	CC	CC	CC	CC	CC	CC	CC	CC	CC	CC	CC	CC	CC	CC	CC	CC	CC	CC	CC	CC	CC	CC	CC	CC	CC	CC
SSL2.50ch01_47706007	A	C	AA	AA	AA	AA	AA	CC	AA	CC	CC	CA	AA	CC	CC	CC	AA	AA	AA	AA	AA	AA	AA	AA	AA	AA	AA	AA	AA	AA	AA	AA	AA	AA	AA	AA	AA	AA	AA	AA	AA	AA	AA	AA	AA	AA	AA	AA	AA
SSL2.50ch01_47706064	C	A	CC	CC	CC	CC	CC	CC	CC	AA	AA	AC	CC	AA	AA	AA	CC	CC	CC	CC	CC	CC	CC	CC	CC	CC	CC	CC	CC	CC	CC	CC	CC	CC	CC	CC	CC	CC	CC	CC	CC	CC	CC	CC	CC	CC	CC	CC	CC
SSL2.50ch01_48384147	T	C	TT	TT	TT	TT	TT	TC	TT	CC	CC	TC	TT	CC	CC	CC	TT	TT	TT	TT	TT	TT	TT	TT	TT	TT	TT	NN	TT	TT	TT	TT	TT	TT	TT	TT	TT	TT	TT	TT	TT	TT	TT	TT	TT	TT	TT	TT	TT
SSL2.50ch01_48384294	G	A	GG	GG	GG	GG	GG	AG	GG	AA	AA	AG	GG	AA	AA	AA	GG	GG	GG	GG	GG	GG	GG	GG	GG	GG	GG	GG	NN	GG	GG	GG	GG	GG	GG	GG	GG	GG	GG	GG	GG	GG	GG	GG	GG	GG	GG	GG	GG
SSL2.50ch01_48391770	G	A	GG	AA	AA	GG	GG	GG	GG	GG	GG	GG	GG	GG	GG	GG	AG	AA	GG	GG	GG	GG	GG	GG	AA	GG	GG	AA	AA	GG	AA	GG	AA	GG	AA	GG	GG	GG	GG	GG	AA	AA	AA	GG	GG	AA	GG	GG	GG
SSL2.50ch01_53326662	G	T	GG	GG	NN	NN	NN	GT	GT	GT	GG	GG	GG	GG	GG	GG	GG	GG	GG	GG	GG	GG	GG	GG	GT	NN	GG	GG	GG	GG	GG	NN	GG	GG	GT	GG	GG	GG	NN	GG	GG	GG	NN	GG	GG	GG	GG	NN	GG
SSL2.50ch01_53597147	A	T	AA	AA	AA	AA	AA	AA	AA	AA	AA	AA	AA	AA	AA	AA	AA	AA	TA	AA	AA	AA	AA	AA	AA	AA	TA	AA	AA	AA	AA	TT	AA	AA	AA	TT	AA	AA	AA	AA	AA	AA	AA	AA	AA	AA	AA	TT	AA
SSL2.50ch01_53597236	G	A	GG	GG	GG	GG	GG	AG	GG	AA	AA	AG	GG	AA	AG	AA	GG	GG	GG	GG	GG	GG	GG	GG	GG	GG	GG	GG	GG	GG	GG	GG	GG	GG	GG	GG	GG	GG	GG	GG	GG	GG	GG	GG	GG	GG	GG	GG	GG
SSL2.50ch01_53597242	T	C	TT	TT	TT	TT	TT	CT	TT	CC	CC	CT	TT	CC	CT	CC	TT	TT	TT	TT	TT	TT	TT	TT	TT	TT	TT	TT	TT	TT	TT	TT	TT	TT	TT	TT	TT	TT	TT	TT	TT	TT	TT	TT	TT	TT	TT	TT	TT
SSL2.50ch01_54539347	T	C	TT	TT	TT	TT	TT	TC	TT	CC	CC	TC	TT	CC	CC	CC	TT	TT	TT	TT	TT	TT	TT	TT	TT	TT	TT	TT	TT	TT	TT	TT	TT	TT	TT	TT	TT	TT	TT	TT	TT	TT	TT	TT	TT	TT	TT	TT	TT
SSL2.50ch01_54539393	G	T	GG	GG	GG	GG	GG	TG	GG	TT	TT	TG	GG	TT	TT	TT	GG	GG	GG	GG	GG	GG	GG	GG	GG	GG	GG	GG	GG	GG	GG	GG	GG	GG	GG	GG	GG	GG	GG	GG	GG	GG	GG	GG	GG	GG	GG	GG	GG
SSL2.50ch01_54543719	T	A	TT	AA	AA	TT	TT	TT	TT	TT	TT	TT	TT	TT	TT	TT	TA	AA	TT	TT	TT	TT	TT	TT	AA	TT	TT	AA	AA	TT	AA	TT	AA	TT	AA	TT	TT	TT	TT	TT	AA	AA	AA	TT	TT	AA	TT	TT	TT
SSL2.50ch01_54552042	G	C	GG	GG	GG	GG	GG	CC	GG	CC	CC	CG	GG	CC	CC	CC	GG	GG	GG	GG	GG	GG	GG	GG	GG	GG	GG	GG	GG	GG	GG	GG	GG	GG	GG	GG	GG	GG	GG	GG	GG	GG	GG	GG	GG	GG	GG	GG	GG
SSL2.50ch01_54568045	C	T	NN	CC	CC	NN	CC	CC	CC	TT	TT	CC	CC	TT	NN	NN	CC	CC	CC	CC	CC	CC	NN	CC	CC	NN	CC	CC	CC	CC	CC	NN	CC	CC	CC	CC	NN	CC	NN	CC	CC	NN	NN	CC	NN	CC	NN	CC	CC
SSL2.50ch01_54703388	T	C	TT	TT	TT	CC	TT	CC	TT	CC	CC	CC	TT	CC	CC	CC	TC	TT	TT	TT	CC	TT	CC	TT	TT	CC	TT	TT	TT	TT	TT	TT	TT	TT	TT	TT	CC	CC	TT	TT	TT	TT	TT	CC	CC	TT	TT	TT	TT
SSL2.50ch01_54704802	A	G	AA	AA	NN	AA	AA	NN	AA	GG	NN	AG	AA	GG	GG	GG	AA	AA	AA	AA	AA	AA	AA	AA	AA	NN	AA	AA	AA	NN	AA	AA	AA	AA	AA	AA	AA	AA	AA	AA	AA	AA	AA	AA	AA	AA	AA	AA	AA
SSL2.50ch01_55019995	T	C	TT	TT	TT	TT	TT	CT	TT	CC	CC	CT	TT	CC	CC	CC	TT	TT	TT	TT	TT	TT	TT	TT	TT	TT	TT	TT	TT	TT	TT	TT	TT	TT	TT	TT	TT	TT	TT	TT	TT	TT	TT	TT	TT	TT	TT	TT	TT
SSL2.50ch01_55029763	C	A	CC	CC	CC	CC	CC	AC	CC	AA	AA	AC	CC	AA	AA	AA	CC	CC	CC	CC	CC	CC	CC	CC	CC	CC	CC	CC	CC	CC	CC	CC	CC	CC	CC	CC	CC	CC	CC	CC	CC	CC	CC	CC	CC	CC	CC	CC	CC
SSL2.50ch01_55284768	G	A	GG	AA	AA	GG	GG	GG	GG	GG	GG	GG	GG	GG	GG	GG	GG	NN	GG	GG	GG	GG	GG	GG	AA	NN	GG	NN	AA	GG	AA	NN	AA	GG	AA	NN	NN	GG	GG	GG	AA	AA	AA	NN	GG	AA	GG	GG	GG
SSL2.50ch01_55284777	G	A	GG	GG	GG	GG	GG	GA	GG	AA	AA	GG	GG	AA	AA	AA	GG	NN	GG	GG	GG	GG	GG	GG	GG	NN	GG	NN	GG	GG	GG	NN	GG	GG	GG	NN	NN	GG	GG	GG	GG	GG	GG	NN	GG	GG	GG	GG	GG
SSL2.50ch01_55284782	G	A	GG	GG	GG	GG	GG	GA	GG	AA	AA	GG	GG	AA	AA	AA	GG	NN	GG	GG	GG	GG	GG	GG	GG	NN	GG	NN	GG	GG	GG	NN	GG	GG	GG	NN	NN	GG	GG	GG	GG	GG	GG	NN	GG	GG	GG	GG	GG
SSL2.50ch01_55284791	C	A	CC	CC	CC	CC	CC	CA	CC	AA	AA	CC	CC	AA	AA	AA	CC	NN	CC	CC	CC	CC	CC	CC	CC	NN	CC	NN	CC	CC	CC	NN	CC	CC	CC	NN	NN	CC	CC	CC	CC	CC	CC	NN	CC	CC	CC	CC	CC
SSL2.50ch01_55284820	C	T	CC	CC	CC	CC	CC	TC	CC	TT	TT	CC	CC	TT	TT	TT	CC	NN	CC	CC	CC	CC	CC	CC	CC	NN	CC	NN	CC	CC	CC	NN	CC	CC	CC	NN	NN	CC	CC	CC	CC	CC	CC	NN	CC	CC	CC	CC	CC
SSL2.50ch01_55929376	G	A	GG	GG	GG	GG	GG	AG	GG	AA	AA	AG	GG	AA	AA	AA	GG	GG	GG	GG	GG	GG	GG	GG	GG	GG	GG	GG	GG	GG	GG	GG	GG	GG	GG	GG	GG	GG	GG	GG	GG	GG	GG	GG	GG	GG	GG	GG	GG
SSL2.50ch01_55934483	G	T	GG	GG	GG	TT	GG	TT	GG	TT	TT	TT	GG	TT	TT	TT	TG	GG	GG	GG	TT	GG	TT	GG	GG	TT	GG	GG	GG	GG	GG	GG	GG	GG	GG	GG	TT	TT	GG	GG	GG	GG	GG	TT	TT	GG	GG	GG	GG
SSL2.50ch01_56139669	T	A	TT	TT	TT	NN	NN	TA	TT	AA	AA	TA	TT	AA	AA	NN	TT	TT	TT	TT	TT	NN	TT	TT	NN	NN	TT	TT	TT	TT	TT	TT	TT	TT	TT	TT	NN	NN	TT	TT	TT	TT	TT	NN	NN	TT	TT	TT	TT
SSL2.50ch01_56139779	A	T	AA	AA	AA	NN	NN	AA	AA	AA	NN	AA	AA	AA	AA	NN	AA	AA	AA	AA	AA	AA	AA	AA	AA	NN	AA	AA	AA	AA	AA	AA	AA	AA	AA	AA	NN	NN	AA	AA	AA	AA	AA	NN	NN	AA	AA	AA	AA
SSL2.50ch01_56164044	C	T	CC	CC	CC	NN	NN	TT	CC	TT	TT	TT	CC	TT	TT	TT	CC	CC	CC	CC	CC	NN	CC	CC	NN	NN	CC	CC	CC	CC	CC	CC	CC	CC	CC	CC	NN	NN	CC	CC	CC	CC	CC	NN	NN	CC	CC	CC	CC
SSL2.50ch01_56606287	C	T	NN	CC	CC	CC	CC	NN	TT	CC	NN	CC	NN	CC	CC	CC	CC	CC	CC	CC	CC	TT	CC	TT	NN	NN	CC	CC	CC	TT	NN	CC	CC	TT	CC	CC	CC	NN	CC	CC	CC	CC	CC	CC	CC	CC	TT	CC	TT
SSL2.50ch01_56638122	C	T	NN	CC	CC	NN	CC	TC	CC	TT	NN	TC	CC	TT	TT	TT	CC	NN	CC	CC	CC	CC	CC	CC	CC	CC	CC	CC	CC	CC	CC	CC	CC	CC	CC	CC	CC	CC	CC	CC	CC	CC	CC	CC	CC	CC	NN	CC	CC
SSL2.50ch01_56638124	G	A	NN	GG	GG	NN	GG	GG	GG	GG	NN	GG	GG	GG	GG	GG	GG	NN	GG	GG	AA	GG	GG	GG	GG	AA	GG	GG	GG	GG	GG	GG	GG	GG	GG	GG	AA	AA	GG	GG	GG	GG	GG	AA	AA	GG	NN	GG	GG
SSL2.50ch01_56638144	A	G	NN	AA	AA	NN	AA	GA	AA	GG	NN	GA	AA	GG	GG	GG	AA	NN	AA	AA	AA	AA	AA	AA	AA	AA	AA	AA	AA	AA	AA	AA	AA	AA	AA	AA	AA	AA	AA	AA	AA	AA	AA	AA	AA	AA	NN	AA	AA
SSL2.50ch01_56638146	C	T	NN	CC	CC	NN	CC	CC	TT	CC	NN	CC	CC	CC	CC	CC	CC	NN	CC	CC	CC	TT	CC	TT	CC	CC	CC	CC	CC	TC	CC	CC	CC	TT	CC	CC	CC	CC	CC	CC	CC	CC	CC	CC	CC	CC	NN	CC	TT
SSL2.50ch01_56759436	A	G	AA	AA	AA	AA	AA	GG	AA	GG	GG	GA	AA	GG	GG	GG	AA	AA	AA	AA	AA	AA	AA	AA	AA	AA	AA	AA	AA	AA	AA	AA	AA	AA	AA	AA	AA	AA	AA	AA	AA	AA	AA	AA	AA	AA	AA	AA	AA
SSL2.50ch01_56759912	A	C	AA	AA	AA	AA	AA	AC	AA	CC	CC	AC	AA	CC	CC	CC	AA	AA	AA	AA	AA	AA	AA	AA	AA	AA	AA	AA	AA	AA	AA	AA	AA	AA	AA	AA	AA	AA	AA	AA	AA	AA	AA	AA	AA	AA	AA	AA	AA
SSL2.50ch01_56759918	C	G	CC	CC	CC	CC	CC	CG	CC	GG	GG	CG	CC	GG	GG	GG	CC	CC	CC	CC	CC	CC	CC	CC	CC	CC	CC	CC	CC	CC	CC	CC	CC	CC	CC	CC	CC	CC	CC	CC	CC	CC	CC	CC	CC	CC	CC	CC	CC
SSL2.50ch01_57961908	A	G	AA	AA	AA	GG	AA	AA	AA	AA	AA	AA	AA	AA	AA	AA	AA	AA	AA	AA	GG	AA	AA	AA	AA	GG	AA	AA	AA	AA	AA	AA	AA	AA	AA	AA	GG	GG	AA	AA	AA	AA	AA	GG	GG	AA	AA	AA	AA
SSL2.50ch01_58305406	G	C	GG	GG	GG	GG	GG	GG	GG	GG	GG	GG	GG	GG	GG	GG	GG	GG	GG	GG	GG	CC	GG	GG	GG	GG	GG	GG	GG	GG	GG	GG	GG	CC	GG	GG	GG	GG	GG	GG	GG	GG	GG	GG	GG	GG	GG	GG	GG
SSL2.50ch01_58666306	G	T	GG	GG	NN	NN	TT	GG	GG	GG	GG	GG	GG	GG	GG	GG	GG	GG	GG	GG	GG	GG	GG	GG	GG	GG	GG	GG	GG	NN	GG	GG	GG	GG	GG	NN	GG	NN	GG	GG	GG	NN	GG	GG	NN	GG	GG	NN	GG
SSL2.50ch01_58666310	T	G	TT	TT	NN	NN	TT	TT	TT	GG	GG	GT	TT	GG	GG	GG	TT	TT	TT	TT	TT	TT	TT	TT	TT	TT	TT	TT	TT	NN	TT	TT	TT	TT	TT	NN	TT	NN	TT	TT	TT	NN	TT	TT	NN	TT	TT	NN	TT
SSL2.50ch01_60291014	C	T	CC	CC	CC	TT	CC	CC	CC	CC	CC	CC	CC	CC	CC	CC	CC	CC	CC	CC	CC	CC	CC	CC	CC	TT	CC	CC	CC	CC	CC	CC	CC	CC	CC	CC	TT	TT	CC	CC	CC	CC	CC	TT	TT	CC	CC	CC	CC
SSL2.50ch01_60486372	C	T	CC	CC	CC	CC	CC	CC	CC	TT	TT	TC	CC	TT	TT	TT	CC	CC	CC	CC	CC	CC	CC	CC	CC	CC	CC	CC	CC	CC	CC	CC	CC	CC	CC	CC	CC	CC	CC	CC	CC	CC	CC	CC	CC	CC	CC	CC	CC
SSL2.50ch01_60521499	G	A	GG	GG	GG	AA	GG	GA	GG	AA	AA	GA	GG	AA	AA	AA	GG	GG	GG	GG	GG	GG	GG	GG	GG	AA	GG	GG	GG	GG	GG	GG	GG	GG	GG	GG	AA	AA	GG	GG	GG	GG	GG	AA	AA	GG	GG	GG	GG
SSL2.50ch01_61266393	C	T	CC	CC	CC	CC	CC	CC	CC	CC	CC	CC	CC	CC	CC	CC	CC	CC	TC	CC	CC	CC	CC	CC	CC	CC	TC	CC	CC	CC	CC	CC	CC	CC	CC	CC	CC	CC	CC	CC	CC	CC	CC	CC	CC	CC	CC	CC	CC
SSL2.50ch01_61887207	T	A	TT	TT	TT	TT	TT	TT	TT	TT	TT	TT	TT	TT	TT	TT	TA	TT	TT	TT	TT	AA	TT	TT	TT	TT	TT	TT	TT	TT	AA	TT	AA	AA	TT	TT	TT	TT	TT	TT	TT	TT	TT	TT	TT	TT	TT	TT	TT
SSL2.50ch01_61887305	G	A	GG	GG	GG	NN	GG	GG	GG	GG	NN	GG	GG	NN	GG	GG	GG	GG	GG	GG	GG	GG	GG	NN	GG	GG	GG	NN	GG	NN	NN	GG	GG	GG	GG	NN	GG	GG	GG	GG	GG	GG	GG	GG	GG	GG	GG	GG	GG
SSL2.50ch01_62782524	C	T	CC	CC	CC	TT	CC	TT	TT	TT	TT	TT	CC	TT	TT	TT	CT	CC	CT	CC	CC	CC	TT	TT	CC	CC	CT	CC	CC	CT	CC	CC	CC	CC	CC	CC	TT	TT	CC	CC	CC	CC	CC	TT	CC	TT	TT	CC	TT
SSL2.50ch01_62808290	A	T	AA	AA	AA	TT	AA	AA	TT	AA	AA	AA	AA	AA	AA	AA	AA	AA	TA	AA	AA	NN	AA	TT	AA	AA	TA	AA	AA	TA	AA	AA	AA	AA	AA	AA	TT	TT	AA	AA	AA	AA	AA	TT	AA	TT	TT	AA	TT
SSL2.50ch01_62808338	A	C	AA	AA	AA	AA	AA	AA	AA	AA	AA	AA	AA	AA	AA	AA	AA	AA	AA	AA	AA	NN	AA	AA	AA	AA	AA	AA	AA	AA	AA	AA	AA	CC	AA	AA	AA	AA	AA	AA	AA	AA	AA	AA	AA	AA	AA	AA	AA
SSL2.50ch01_62808429	C	A	CC	CC	CC	AA	CC	AC	AA	CC	CC	AC	CC	CC	CC	CC	AC	CC	AC	CC	CC	CC	AA	AA	CC	CC	AC	CC	CC	AC	CC	CC	CC	CC	CC	CC	AA	AA	CC	CC	CC	CC	CC	AA	CC	AA	AA	CC	AA
SSL2.50ch01_63238861	C	G	CC	CC	CC	GG	CC	GG	GG	GG	GG	GG	CC	GG	GG	GG	GC	CC	GC	CC	CC	CC	GG	GG	CC	CC	NN	CC	CC	GC	CC	CC	CC	CC	CC	CC	GC	GG	CC	CC	CC	CC	CC	GG	CC	GG	GG	CC	GG
SSL2.50ch01_63238882	T	A	TT	TT	TT	AA	TT	AA	AA	TT	TT	TA	TT	TT	TT	TT	TA	TT	TA	TT	TT	TT	AA	AA	TT	TT	NN	TT	TT	TA	TT	TT	TT	TT	TT	TT	TA	AA	TT	TT	TT	TT	TT	AA	TT	AA	AA	TT	AA
SSL2.50ch01_63238901	A	T	AA	AA	AA	TT	AA	NN	TT	AA	AA	TA	AA	AA	AA	AA	TA	AA	TA	AA	AA	AA	TT	TT	AA	AA	NN	AA	AA	TA	AA	AA	AA	AA	AA	AA	TA	TT	AA	AA	AA	AA	AA	TT	AA	TT	TT	AA	TT
SSL2.50ch01_63238951	T	C	TT	CC	CC	TT	TT	CT	TT	TT	TT	CT	TT	TT	TT	TT	CC	CC	TT	TT	TT	CC	CC	TT	CC	TT	TT	CC	CC	TT	CC	CC	CC	CC	CC	TT	TT	TT	TT	TT	CC	CC	CC	TT	TT	TT	TT	TT	TT
SSL2.50ch01_63470152	C	A	CC	CC	CC	CA	CA	CC	CC	CC	CC	CC	CC	CC	CC	CC	CC	CC	CC	CC	CC	CC	CC	CC	CA	CC	CA	CC	CA	CA	CC	CA	CC	CC	CC	CC	CC	CA	CA	CA	CC	CC	CA	CC	CC	CC	CC	CC	CA
SSL2.50ch01_63470205	C	T	CC	TC	CC	TC	TC	CC	CC	CC	CC	TC	CC	CC	CC	CC	CC	CC	CC	CC	CC	CC	CC	CC	TC	CC	TC	CC	NN	TC	CC	TC	CC	CC	CC	CC	CC	TC	TC	TC	CC	CC	TC	TC	CC	CC	CC	CC	NN
SSL2.50ch01_63620034	C	T	CC	CC	CC	TT	CC	CC	TT	CC	CC	CC	CC	CC	CC	CC	CC	CC	TC	CC	CC	CC	CC	TT	CC	CC	TC	CC	CC	TT	CC	CC	CC	CC	CC	CC	TC	TT	CC	CC	CC	CC	CC	TT	CC	TT	TT	CC	TT
SSL2.50ch01_63738854	G	T	NN	NN	GG	TT	GG	NN	TT	GG	NN	GT	GG	GG	GG	NN	GT	GG	GT	GG	GG	GG	TT	TT	GG	GG	GG	GG	GG	GT	GG	GG	GG	GG	GG	GG	GT	TT	GG	GG	NN	GG	GG	TT	GG	TT	TT	GG	TT
SSL2.50ch01_64049697	A	G	AA	AA	AA	GG	AA	GA	GG	AA	AA	GA	AA	AA	AA	AA	GA	AA	GA	AA	AA	AA	GG	GG	AA	AA	GA	AA	AA	GA	AA	AA	AA	AA	AA	GG	GA	GG	AA	AA	AA	AA	AA	GG	AA	GG	GG	GG	GG
SSL2.50ch01_64049761	T	A	TT	TT	TT	AA	TT	TT	AA	TT	TT	TT	TT	TT	TT	TT	TT	TT	TT	TT	TT	TT	AA	AA	TT	TT	NN	NN	TT	NN	TT	TT	TT	TT	TT	AA	TT	AA	TT	TT	TT	TT	TT	AA	TT	AA	AA	AA	AA
SSL2.50ch01_64116319	G	C	GG	GG	GG	GG	GG	CG	GG	CC	CC	CG	GG	CC	CC	CC	GG	GG	GG	GG	GG	GG	GG	GG	GG	GG	GG	GG	GG	GG	GG	GG	GG	GG	GG	GG	GG	GG	GG	GG	GG	GG	GG	GG	GG	GG	GG	GG	GG
SSL2.50ch01_64151812	G	A	GG	GG	GG	NN	GG	AA	NN	AA	AA	AA	GG	AA	AA	AA	GG	GG	GG	GG	GG	GG	NN	NN	GG	GG	GG	GG	GG	GG	GG	GG	GG	GG	GG	GG	GG	NN	GG	GG	GG	GG	GG	NN	GG	NN	NN	GG	NN
SSL2.50ch01_64326838	A	T	AA	AA	AA	TT	AA	TT	AA	TT	TT	TT	AA	TT	TT	TT	AA	AA	TA	AA	AA	AA	NN	TT	AA	TT	TA	AA	AA	TA	AA	AA	AA	AA	AA	TT	TA	NN	TT	AA	AA	AA	AA	TT	TT	TT	TT	AA	TT
SSL2.50ch01_64326930	A	C	AA	AA	AA	CC	AA	AA	AA	AA	AA	AA	AA	AA	AA	AA	AA	AA	AC	AA	AA	AA	AA	CC	AA	AA	AC	AA	AA	AC	AA	AA	AA	AA	AA	CC	AC	AC	CC	AA	AA	AA	AA	AA	AA	CC	CC	AA	CC
SSL2.50ch01_64448082	C	A	CC	NN	CC	CA	CC	CC	CC	CC	CC	CC	CC	CC	CC	CC	CC	CC	CC	NN	CC	CC	CC	AA	CC	CC	CA	CC	CC	CC	NN	CC	NN	CC	CC	CA	CC	CC	NN	CC	CC	CC	NN	CC	CC	CC	CC	CC	CA
SSL2.50ch01_64552604	A	G	GG	AA	AA	AA	AA	AA	NN	AA	AA	AA	AA	AA	AA	AA	AA	AA	AG	GG	AA	NN	AA	AA	AA	AA	AG	AA	AA	AG	AA	AA	AA	AA	AA	AA	AG	AG	GG	GG	AA	AA	AA	NN	NN	AA	AA	GG	AA
SSL2.50ch01_64552611	A	G	AA	AA	AA	GG	AA	GG	NN	GG	GG	GG	AA	GG	GG	GG	AG	AA	AG	AA	AA	NN	GG	GG	AA	AA	AG	AA	AA	AG	AA	AA	AA	AA	AA	GG	AA	AG	AA	AA	AA	AA	AA	NN	NN	GG	GG	AA	GG
SSL2.50ch01_64552613	G	A	GG	GG	GG	AA	GG	GG	NN	GG	GG	GG	GG	GG	GG	GG	GG	GG	AG	GG	GG	NN	GG	AA	GG	GG	AG	GG	GG	AG	GG	GG	GG	GG	GG	AA	GG	AG	GG	GG	GG	GG	GG	NN	NN	AA	AA	GG	AA
SSL2.50ch01_64632648	A	T	NN	AA	AA	NN	AA	NN	AA	AA	AA	AA	AA	AA	AA	NN	AA	NN	AT	AA	AA	AA	AA	TT	AA	AA	AT	AA	AA	AT	NN	AA	AA	AA	AA	TT	AA	AA	AA	AA	AA	AA	AA	AA	AA	TT	AT	AA	TT
SSL2.50ch01_64633704	A	G	AA	AA	AA	GG	AA	GG	AA	GG	NN	GG	AA	NN	GG	GG	GG	NN	GA	AA	AA	AA	GG	NN	AA	AA	NN	AA	AA	GA	AA	AA	AA	AA	AA	NN	AA	NN	AA	AA	AA	AA	AA	AA	AA	GG	GG	AA	GG
SSL2.50ch01_64958397	T	G	TT	GT	GT	GT	GT	GT	GT	GT	GT	GT	GT	GT	GT	GT	GT	GT	GT	GT	GT	GT	GT	GT	GT	GT	GT	NN	GT	GT	GT	GT	GT	GT	GT	GT	GT	GT	GT	GT	GT	GT	GT	GT	GT	GT	GT	GT	GT
SSL2.50ch01_65493377	A	G	AA	AA	AA	GG	AA	GA	AA	GG	GG	GA	AA	GG	GG	GG	AA	AA	GA	AA	AA	AA	AA	GG	AA	AA	GA	AA	AA	GA	AA	AA	AA	AA	AA	GG	AA	GA	AA	AA	AA	AA	AA	AA	AA	GG	GG	AA	GG
SSL2.50ch01_65494077	G	T	GG	GG	GG	TT	GG	TT	GG	TT	TT	GT	GG	TT	TT	TT	GG	GG	GT	GG	GG	GG	GG	TT	GG	GG	GT	GG	GG	GT	GG	GG	GG	GG	GG	TT	GG	GT	GG	GG	GG	GG	GG	GG	GG	TT	TT	GG	TT
SSL2.50ch01_65538100	C	A	CC	CC	CC	AA	CC	CA	CC	AA	AA	CA	CC	AA	AA	AA	CC	CC	CA	CC	CC	CC	CC	AA	CC	CC	CA	CC	CC	NN	CC	CC	CC	CC	CC	AA	CC	CA	CC	CC	CC	CC	CC	CC	CC	AA	AA	CC	AA
SSL2.50ch01_65541533	C	T	CC	CC	CC	TT	CC	TT	CC	CT	NN	CT	CC	TT	TT	NN	CC	CC	CT	CC	CC	CC	CC	NN	NN	CC	NN	NN	CC	CT	CC	CC	CC	CC	CC	NN	CC	CT	CC	CC	CC	CC	CC	CC	CC	TT	TT	CC	TT
SSL2.50ch01_65542760	A	C	AA	AA	AA	CC	AA	AA	AA	AA	AA	AA	AA	AA	AA	AA	AA	AA	AC	AA	AA	AA	AA	CC	AA	AA	AC	AA	AA	AC	AA	AA	AA	AA	AA	CC	AA	AC	AA	AA	AA	AA	AA	AA	AA	CC	CC	AA	CC
SSL2.50ch01_65542773	C	T	CC	CC	CC	TT	CC	CC	CC	CC	CC	CC	CC	CC	CC	CC	CC	CC	CT	CC	CC	CC	CC	TT	CC	CC	CT	CC	CC	CT	CC	CC	CC	CC	CC	TT	CC	CT	CC	CC	CC	CC	CC	CC	CC	TT	TT	CC	TT
SSL2.50ch01_65700471	T	C	CC	TT	TT	TT	TT	TC	TT	TT	TT	TT	TT	TT	TT	TT	TC	TT	TT	TT	TT	TT	CC	TT	TT	CC	TT	TT	TT	TT	TT	TT	TT	TT	TT	TT	TT	TT	TT	TT	TT	TT	TT	NN	CC	TT	TT	TT	TT
SSL2.50ch01_65700485	T	G	TT	TT	TT	GG	TT	TT	TT	TT	TT	TT	TT	TT	TT	TT	TT	TT	TG	TT	TT	TT	TT	GG	TT	TT	TG	TT	TT	TG	TT	TT	TT	TT	TT	GG	TT	TG	TT	TT	TT	TT	TT	NN	TT	GG	GG	TT	GG
SSL2.50ch01_65700600	G	C	GG	GG	GG	CC	GG	GG	GG	GG	GG	GG	GG	GG	GG	GG	GG	GG	GG	GG	GG	NN	GG	CC	GG	GG	CG	GG	NN	CG	GG	GG	GG	GG	GG	CC	GG	CG	GG	GG	GG	GG	GG	NN	GG	CC	CC	GG	CC
SSL2.50ch01_66015065	C	T	CC	CC	CC	NN	CC	CC	CC	CC	TC	CC	CC	TC	CC	CC	CC	CC	NN	NN	CC	CC	CC	CC	CC	CC	CC	CC	NN	TC	CC	CC	CC	CC	NN	NN	CC	CC	CC	CC	CC	CC	CC	CC	CC	TC	CC	TC	CC
SSL2.50ch01_66015080	G	A	GG	GG	GG	GG	GG	GG	GA	GG	GG	GG	GG	GG	GG	GG	GG	GA	GG	GG	GG	GG	GG	GG	GG	GG	GG	GG	GG	GG	GG	GA	GG	GG	NN	NN	GG	GG	GA	GG	GG	GG	NN	GG	GG	GG	GG	GG	GG
SSL2.50ch01_66015111	G	A	GG	GG	GG	GG	GG	GG	GG	GG	GG	GG	GA	GG	GG	GG	GG	GA	GG	GG	GG	GG	GG	GG	GG	GG	GG	GG	GG	GG	GG	GG	GA	GG	NN	NN	GG	GG	GG	GG	GG	GG	GG	GG	GA	GG	GG	GG	GG
SSL2.50ch01_66015113	A	G	AA	AA	AA	AA	AA	AA	AA	GA	AA	AA	AA	AA	AA	AA	AA	AA	AA	NN	AA	AA	AA	AA	AA	AA	AA	GA	AA	AA	AA	AA	AA	AA	NN	NN	AA	AA	AA	AA	AA	GA	AA	AA	AA	NN	NN	AA	GA
SSL2.50ch01_66015121	G	A	GA	GG	GG	GG	GG	GG	GG	GG	GG	GG	GG	GG	GG	GG	GG	GG	GG	GG	GG	GG	GA	GG	GA	GG	GA	GG	GG	GA	GG	GG	GG	GG	NN	NN	GA	GG	GG	GG	GG	GG	GG	GG	GG	GG	GA	GA	GG
SSL2.50ch01_66015152	G	A	GA	GG	NN	GA	GG	GA	GG	GA	GG	GG	GG	GA	GA	GG	GG	GG	GA	GA	GA	GG	GG	GG	GG	GA	GG	GA	GA	GA	GG	GG	GG	GG	NN	NN	GG	GG	GG	GG	GG	GA	GG	GG	GG	GA	NN	GA	GA
SSL2.50ch01_66035496	C	A	AA	CC	CC	AA	CC	AA	CC	AA	AA	AA	CC	AA	AA	AA	CA	CC	CA	CC	CC	CC	AA	AA	CC	AA	CA	CC	CC	NN	CC	CC	CC	CC	AA	AA	CC	CA	CC	CC	CC	CC	CC	AA	AA	AA	AA	CC	AA
SSL2.50ch01_66353033	G	C	CC	GG	GG	CC	GG	GC	GG	CC	CC	CC	GG	CC	CC	CC	GG	GG	GC	GG	GG	GG	GG	CC	GG	CC	GC	GG	GG	GC	GG	GG	GG	GG	GG	CC	GG	GC	GG	GG	GG	GG	GG	GG	CC	CC	CC	GG	CC
SSL2.50ch01_66489558	G	A	AA	GG	GG	AA	GG	GG	GG	GG	GG	GG	GG	GG	GG	GG	GG	GG	AA	GG	GG	NN	GG	AA	GG	AA	NN	GG	GG	AA	GG	GG	GG	GG	GG	AA	GG	AG	GG	NN	GG	GG	GG	GG	AA	AA	AA	GG	AA
SSL2.50ch01_67322825	G	A	AA	GG	NN	AA	GG	AA	GG	AA	NN	AA	GG	AA	AA	AA	AG	GG	AG	GG	GG	GG	AA	AA	GG	AA	AG	GG	GG	AG	GG	GG	GG	GG	AA	AA	GG	AG	GG	AA	GG	GG	GG	AA	AA	AA	AA	GG	AA
SSL2.50ch01_67460934	A	T	TT	AA	AA	TT	AA	TT	AA	TT	TT	TT	AA	TT	TT	TT	AT	AA	AT	AA	AA	AA	TT	TT	AA	TT	AT	AA	AA	TT	AA	AA	AA	AA	TT	TT	AA	AT	AA	TT	AA	AA	AA	TT	TT	TT	TT	AA	TT
SSL2.50ch01_67460943	T	C	CC	TT	TT	CC	TT	CC	TT	CC	CC	CC	TT	CC	CC	CC	CT	TT	CT	TT	TT	TT	CC	CC	TT	CC	CT	TT	TT	CC	TT	TT	TT	TT	CC	CC	TT	CT	TT	CC	TT	TT	TT	CC	CC	CC	CC	TT	CC
SSL2.50ch01_67944423	C	G	NN	CC	CC	CC	CC	NN	CC	GG	NN	GC	CC	CC	GG	GG	CC	CC	NN	CC	CC	CC	CC	NN	CC	CC	CC	CC	CC	CC	CC	CC	CC	CC	NN	NN	CC	CC	CC	CC	CC	CC	CC	CC	CC	CC	CC	CC	CC
SSL2.50ch01_67944486	G	A	GG	GG	GG	GG	GG	NN	GG	AA	AA	AG	GG	GG	AA	AA	GG	GG	GG	GG	GG	GG	GG	GG	GG	GG	GG	GG	GG	NN	GG	GG	GG	GG	AA	GG	GG	GG	GG	GG	GG	GG	GG	GG	GG	GG	GG	GG	GG
SSL2.50ch01_67948715	C	G	CC	CC	CC	CC	CC	CC	CC	CC	CC	CC	CC	CC	CC	CC	CC	CC	CC	CC	CC	CC	CC	CC	GG	CC	CC	CC	GG	CC	CC	CC	CC	CC	CC	CC	CC	CC	CC	CC	GG	CC	CC	CC	CC	CC	CC	CC	CC
SSL2.50ch01_69103658	A	G	AA	AA	AA	AA	AA	GA	AA	GG	GG	GG	AA	GG	GG	GG	AA	AA	AA	AA	AA	AA	AA	GG	AA	AA	AA	AA	AA	NN	AA	AA	AA	AA	AA	AA	AA	AA	AA	AA	AA	AA	AA	AA	AA	GG	NN	AA	NN
SSL2.50ch01_69103676	C	A	CC	AA	AA	CC	CC	CC	AA	CC	CC	CC	CC	CC	CC	CC	CA	AA	CC	CC	CC	AA	CC	CC	CC	CC	CC	AA	CC	NN	AA	AA	AA	AA	CC	CC	CC	CC	CC	CC	CC	CC	AA	CC	CC	CC	NN	CC	NN
SSL2.50ch01_69103744	T	G	GT	TT	TT	TT	TT	TT	TT	TT	TT	TT	TT	TT	TT	TT	GT	TT	TT	TT	TT	TT	TT	TT	TT	TT	GT	TT	TT	NN	GT	TT	GT	GT	TT	TT	TT	TT	TT	TT	TT	TT	TT	TT	TT	GT	GT	TT	GT
SSL2.50ch01_69103753	C	T	CT	CC	CC	CC	CC	CC	CC	CC	CC	CC	CC	CC	CC	CC	CT	CC	CT	CT	CC	CC	CC	CC	CC	CC	CT	CC	CC	CT	CT	CC	CT	CT	CT	CC	CC	CC	CC	CC	CC	CC	CC	CC	CC	CT	TT	CC	CT
SSL2.50ch01_69255581	A	C	AA	AA	AA	AA	AA	CC	AA	CC	CC	AC	AA	CC	CC	CC	AA	AA	AA	AA	AA	AA	AA	AA	AA	AA	AA	AA	AA	AA	AA	AA	AA	AA	AA	AA	AA	AA	AA	AA	AA	AA	AA	AA	AA	AA	AA	AA	AA
SSL2.50ch01_69255600	C	T	CC	CC	CC	CC	CC	TT	CC	TT	TT	CT	CC	TT	TT	TT	CC	CC	CC	CC	CC	CC	CC	CC	CC	CC	CC	CC	CC	CC	CC	CC	CC	CC	CC	CC	CC	CC	CC	CC	CC	CC	CC	CC	CC	CC	CC	CC	CC
SSL2.50ch01_69258856	T	C	TT	TT	TT	TT	TT	TT	TT	NN	NN	CC	TT	NN	NN	NN	TT	TT	TT	TT	NN	TT	TT	CC	TT	TT	NN	TT	TT	CC	TT	TT	TT	TT	TT	TT	TT	TT	TT	TT	TT	TT	TT	TT	TT	CC	CC	TT	CC
SSL2.50ch01_69272145	T	A	TT	TT	TT	TT	TT	TT	TT	TT	TT	TT	TT	TT	TT	TT	TT	TT	TT	TT	TT	TT	TT	AA	TT	TT	TT	TT	TT	AA	TT	TT	TT	TT	TT	TT	TT	TT	TT	TT	TT	TT	TT	TT	TT	AA	AA	TT	AA
SSL2.50ch01_69272157	T	C	TT	TT	TT	TT	TT	CC	TT	CC	CC	CC	TT	CC	CC	CC	NN	TT	TT	TT	TT	TT	CC	CC	TT	TT	TT	TT	TT	CC	TT	TT	TT	TT	TT	TT	TT	TT	TT	TT	TT	TT	TT	TT	TT	CC	CC	TT	CC
SSL2.50ch01_69272158	G	C	GG	GG	GG	GG	GG	CC	GG	CC	CC	CC	GG	CC	CC	CC	NN	GG	GG	GG	GG	GG	CC	CC	GG	GG	GG	GG	GG	CC	GG	GG	GG	GG	GG	GG	GG	GG	GG	GG	GG	GG	GG	GG	GG	CC	CC	GG	CC
SSL2.50ch01_69272166	G	A	GG	GG	GG	GG	GG	AA	GG	AA	AA	AA	GG	AA	AA	AA	NN	GG	GG	GG	GG	GG	AA	AA	GG	GG	GG	GG	GG	AA	GG	GG	GG	GG	GG	GG	GG	GG	GG	GG	GG	GG	GG	GG	GG	AA	AA	GG	AA
SSL2.50ch01_69368302	C	T	CC	TT	TT	CC	TT	CC	TT	CC	CC	CC	CC	CC	CC	CC	TC	TT	CC	CC	CC	TT	CC	CC	CC	CC	CC	TT	CC	CC	TT	TT	TT	TT	CC	CC	CC	CC	CC	CC	CC	CC	TT	CC	CC	CC	CC	CC	CC
SSL2.50ch01_69374198	A	G	AA	GG	GG	AA	GG	AA	GG	AA	AA	AA	AA	AA	AA	AA	AA	GG	AA	AA	AA	GG	AA	AA	AA	AA	AA	GG	AA	AA	GG	GG	GG	GG	AA	AA	AA	AA	AA	AA	AA	AA	GG	AA	AA	AA	AA	AA	AA
SSL2.50ch01_69618626	A	T	AA	AA	AA	AA	AA	AT	AA	AA	AA	AA	AA	TT	NN	AA	AT	AA	AA	AA	AA	AA	TT	AA	AA	AA	AA	AA	AA	AA	AA	AA	AA	AA	AA	AA	AA	NN	AA	AA	AA	AA	AA	AA	AA	AA	AA	AA	AA
SSL2.50ch01_69660826	G	A	AA	GG	GG	AA	GG	GG	GG	GG	GG	GG	GG	GG	GG	GG	GG	GG	GA	AA	AA	GG	GG	AA	GG	AA	GG	GG	GG	AA	GG	GG	GG	GG	AA	AA	AA	AA	AA	AA	GG	AA	GG	AA	AA	AA	AA	AA	AA
SSL2.50ch01_69662664	C	T	NN	CC	CC	CC	TT	TC	CC	CC	NN	TC	TT	CC	CC	CC	CC	CC	TT	CC	CC	CC	CC	CC	TT	CC	NN	CC	TT	CC	CC	CC	CC	CC	CC	NN	CC	CC	CC	CC	TT	CC	CC	CC	CC	CC	CC	CC	CC
SSL2.50ch01_69910720	G	T	GG	GG	GG	GG	GG	GG	GG	GG	GG	GG	GG	GG	GG	GG	GG	GG	GT	GG	GG	GG	GG	GG	GG	GG	GT	GG	GG	GG	GG	GG	GG	GG	GG	GG	GG	GG	GG	GG	GG	GG	GG	GG	GG	GG	GG	GG	GG
SSL2.50ch01_70196327	A	T	AA	AA	AA	AA	TT	TT	AA	NN	TT	TT	TT	TT	TT	TT	TT	AA	AA	AA	AA	AA	TT	TT	TT	AA	AA	AA	TT	TT	AA	NN	AA	AA	AA	AA	AA	AA	AA	AA	AT	TT	AA	AA	AA	TT	TT	AA	TT
SSL2.50ch01_70355038	T	C	TT	TT	TT	TT	NN	CC	TT	CC	CC	CC	CC	CC	CC	CC	TT	TT	TT	TT	TT	TT	NN	CC	CC	TT	TT	TT	CC	CC	TT	TT	TT	TT	TT	TT	TT	TT	TT	TT	TC	CC	TT	TT	TT	CC	CC	TT	CC
SSL2.50ch01_70355041	A	G	AA	GG	GG	AA	NN	AA	GG	AA	AA	AA	AA	AA	AA	AA	GG	GG	AA	AA	AA	GG	NN	AA	AA	GG	AA	GG	AA	AA	GG	GG	GG	GG	AA	AA	AA	AA	AA	AA	AA	AA	GG	AA	AA	AA	AA	AA	AA
SSL2.50ch01_70579694	C	A	AA	AA	AA	AA	CC	NN	AA	CC	CC	CC	CC	NN	CC	CC	AA	NN	CA	AA	AA	AA	CC	CC	CC	AA	CA	AA	CC	CC	AA	AA	AA	AA	NN	AA	NN	AA	AA	AA	CA	CC	AA	AA	AA	CC	CC	AA	CC
SSL2.50ch01_70579734	T	C	TT	TT	TT	TT	CC	NN	TT	CC	CC	CC	CC	NN	CC	CC	TT	NN	TT	TT	TT	TT	CC	CC	CC	TT	TT	TT	CC	CC	TT	TT	TT	TT	NN	TT	NN	TT	TT	TT	TC	CC	TT	TT	TT	CC	CC	TT	CC
SSL2.50ch01_70579739	C	T	CC	CC	CC	CC	CC	NN	CC	CC	CC	CC	CC	NN	CC	CC	CC	NN	CC	CC	CC	CC	CC	CC	TT	CC	CC	CC	TT	CC	CC	CC	CC	CC	NN	CC	NN	CC	CC	CC	TC	CC	CC	CC	CC	CC	CC	CC	CC
SSL2.50ch01_70579752	C	T	CC	CC	CC	CC	CC	NN	CC	CC	CC	CC	CC	NN	CC	CC	CC	NN	CC	CC	CC	CC	CC	CC	TT	CC	CC	CC	TT	CC	CC	CC	CC	CC	NN	CC	NN	CC	CC	CC	TC	CC	CC	CC	CC	CC	CC	CC	CC
SSL2.50ch01_70579762	G	A	GG	GG	GG	GG	GG	NN	GG	GG	GG	GG	GG	NN	GG	GG	GG	NN	GG	GG	GG	GG	GG	GG	AA	GG	GG	GG	AA	GG	GG	GG	GG	GG	NN	GG	NN	GG	GG	GG	GA	GG	GG	GG	GG	GG	GG	GG	GG
SSL2.50ch01_70579819	G	T	NN	GG	NN	GG	GG	NN	GG	GG	NN	GG	GG	NN	GG	GG	GG	NN	GG	GG	GG	GG	GG	GG	TT	NN	GG	GG	TT	GG	NN	GG	GG	GG	NN	GG	GG	GG	GG	GG	GT	GG	GG	GG	GG	GG	GG	GG	GG
SSL2.50ch01_70584541	G	T	GG	GG	GG	GG	GG	GG	GG	NN	NN	GG	GG	GG	GG	NN	GG	GG	GG	GG	GG	GG	GG	TT	GG	GG	GG	GG	GG	TG	GG	NN	GG	GG	GG	GG	GG	GG	GG	GG	GG	GG	GG	GG	GG	TT	TT	NN	TT
SSL2.50ch01_70584653	T	G	TT	TT	NN	TT	GG	GG	TT	NN	NN	GG	NN	GG	GG	NN	TT	TT	TT	TT	TT	TT	NN	GG	GG	TT	GT	TT	GG	GG	TT	TT	TT	TT	TT	TT	TT	TT	TT	NN	GT	GG	TT	TT	TT	GG	GG	TT	GG
SSL2.50ch01_70807381	T	C	CC	CC	CC	NN	TT	TT	CC	TT	TT	TT	TT	TT	TT	TT	CT	CC	CT	CC	CC	CC	TT	TT	TT	CC	CT	CC	TT	TT	CC	CC	CC	CC	CC	CC	CC	CC	CC	CC	CT	TT	CC	CC	CC	TT	TT	CC	TT
SSL2.50ch01_70809175	C	T	CC	CC	CC	CC	CC	CC	CC	CC	CC	CC	CC	CC	CC	CC	CC	CC	CC	CC	CC	CC	CC	TT	CC	CC	CC	CC	CC	TT	CC	CC	CC	CC	CC	CC	CC	CC	CC	CC	CC	CC	CC	CC	CC	TT	TT	CC	TT
SSL2.50ch01_70811737	G	C	GG	GG	GG	GG	GG	GC	GG	CC	NN	CC	CC	CC	CC	CC	GC	GG	GG	GG	GG	GG	CC	GG	GG	GG	GG	GG	GG	GG	GG	GG	GG	GG	GG	GG	GG	GG	GG	GG	GG	GG	GG	GG	GG	GG	GG	GG	GG
SSL2.50ch01_70945747	G	A	GG	AA	AA	AA	GG	GG	AA	GG	GG	GG	GG	GG	GG	GG	GG	AA	AG	GG	GG	AA	GG	GG	GG	AA	AG	AA	GG	GG	AA	AA	AA	AA	AA	GG	GG	NN	GG	GG	GG	GG	AA	GG	GG	GG	GG	GG	GG
SSL2.50ch01_70945771	A	C	AA	AA	AA	AA	AA	AA	AA	AA	AA	AA	AA	AA	AA	AA	AA	AA	AA	AA	AA	AA	AA	AA	CC	AA	AA	AA	CC	AA	AA	AA	AA	AA	AA	AA	AA	AA	AA	AA	AC	AA	AA	AA	AA	AA	AA	AA	AA
SSL2.50ch01_70968951	A	T	AA	TT	TT	TT	AA	AA	TT	AA	AA	AA	AA	AA	AA	AA	TA	TT	AA	AA	AA	TT	AA	AA	AA	TT	AA	TT	AA	AA	TT	TT	TT	TT	TT	AA	AA	TA	AA	AA	AA	AA	TT	AA	AA	AA	AA	AA	AA
SSL2.50ch01_70977415	T	C	TT	TT	TT	TT	TT	TT	TT	TT	TT	TT	NN	TT	TT	TT	TT	TT	TT	TT	TT	TT	TT	TT	CC	TT	TT	TT	CC	TT	TT	TT	TT	NN	TT	TT	TT	TT	TT	TT	CT	TT	TT	TT	TT	TT	TT	TT	TT
SSL2.50ch01_71197034	C	A	CC	CC	CC	CC	CC	AC	CC	AA	AA	AA	AA	AA	AA	AA	AC	CC	CC	CC	CC	CC	AA	CC	CC	CC	CC	CC	CC	CC	CC	CC	CC	CC	CC	CC	CC	CC	CC	CC	CC	CC	CC	CC	CC	CC	CC	CC	CC
SSL2.50ch01_71842483	A	G	AA	AA	GG	AA	NN	AA	GG	AA	AA	AA	AA	AA	AA	AA	GG	GG	AA	NN	AA	GG	AA	AA	AA	GG	AA	NN	AA	AA	GG	GG	GG	NN	AA	NN	AA	AA	AA	AA	NN	NN	AA	AA	AA	AA	AA	AA	AA
SSL2.50ch01_71842497	G	A	GG	GG	GG	AG	NN	AA	GG	AA	AA	AA	GG	AA	AA	AA	GG	GG	GG	NN	GG	GG	GG	GG	GG	GG	GG	NN	GG	GG	GG	GG	GG	NN	GG	NN	GG	GG	GG	GG	NN	NN	GG	GG	GG	GG	GG	GG	GG
SSL2.50ch01_71939130	C	T	CC	CC	CC	CC	CC	CT	CC	TT	TT	CT	CC	TT	TT	TT	CC	CC	CC	CC	CC	CC	CC	CC	CC	CC	CC	CC	CC	CC	CC	CC	CC	CC	CC	CC	CC	CC	CC	CC	CC	CC	CC	CC	CC	CC	CC	CC	CC
SSL2.50ch01_72090574	C	T	CC	TT	CC	CC	CC	CC	CC	CC	NN	CC	NN	CC	CC	CC	TC	TT	CC	CC	CC	NN	CC	CC	TT	CC	CC	CC	CC	TC	TT	TT	TT	TT	CC	CC	CC	CC	NN	CC	CC	CC	NN	CC	CC	TT	TT	NN	TT
SSL2.50ch01_72161491	G	A	GG	NN	NN	GG	GG	GA	GG	NN	GG	GA	GG	AA	AA	AA	GG	GG	GG	GG	GG	GG	GG	GG	GG	GG	GG	GG	GG	GG	GG	NN	GG	GG	GG	GG	GG	GG	GG	NN	GG	NN	GG	GG	GG	GG	GG	NN	GG
SSL2.50ch01_72161497	C	A	CC	NN	NN	CC	CC	CA	CC	NN	CC	CA	CC	AA	AA	AA	CC	CC	CC	CC	CC	CC	CC	CC	CC	CC	CC	CC	CC	CC	CC	NN	CC	CC	CC	CC	CC	CC	CC	NN	CC	NN	CC	CC	CC	CC	CC	NN	CC
SSL2.50ch01_72161535	T	C	TT	NN	NN	TT	TT	TC	TT	NN	CC	TC	TT	TT	TT	TT	CC	TT	TT	TT	TT	TT	CC	TT	TT	TT	TT	TT	TT	TT	TT	NN	TT	TT	TT	TT	TT	TT	TT	NN	TT	NN	TT	TT	TT	TT	TT	NN	TT
SSL2.50ch01_72161537	C	T	CC	NN	NN	TT	CC	CC	CC	NN	CC	CC	CC	CC	CC	CC	CC	CC	TT	TT	TT	CC	CC	CC	CC	CC	TC	CC	CC	CC	CC	NN	CC	CC	TT	TT	TT	TT	TT	NN	TT	NN	CC	TT	TT	CC	CC	NN	CC
SSL2.50ch01_72283481	G	A	GG	GG	GG	GG	GG	AA	GG	AA	AA	AA	GG	AA	AA	AA	GG	GG	GG	GG	GG	GG	GG	GG	GG	GG	GG	GG	GG	GG	GG	GG	GG	GG	GG	NN	GG	GG	GG	GG	GG	GG	GG	GG	GG	GG	GG	GG	GG
SSL2.50ch01_72292099	A	G	AA	AA	AA	AA	AA	GG	AA	AA	AA	GG	AA	GG	GG	GG	GA	AA	AA	AA	AA	AA	GG	AA	AA	AA	AA	AA	AA	AA	AA	AA	AA	AA	AA	AA	AA	AA	AA	AA	AA	AA	AA	AA	AA	AA	AA	AA	AA
SSL2.50ch01_72292109	T	A	TT	TT	TT	TT	TT	AA	TT	TT	TT	AA	TT	AA	AA	AA	TA	TT	TT	TT	TT	TT	AA	TT	TT	TT	TT	TT	TT	TT	TT	TT	TT	TT	TT	TT	TT	TT	TT	TT	TT	TT	TT	TT	TT	TT	TT	TT	TT
SSL2.50ch01_72294715	T	G	TT	TT	TT	TT	TT	NN	TT	TT	TT	TT	TT	TT	TT	TT	TT	TT	TT	TT	TT	NN	TT	TT	NN	TT	NN	TT	TT	TT	TT	TT	TT	GG	TT	TT	TT	NN	TT	TT	TT	TT	TT	TT	TT	TT	TT	TT	TT
SSL2.50ch01_72328004	G	C	GG	GG	GG	GG	GG	GG	GG	GG	GG	CG	GG	CC	CC	CC	GG	GG	GG	GG	GG	GG	GG	GG	GG	GG	GG	GG	GG	GG	GG	GG	GG	GG	GG	GG	GG	GG	GG	GG	GG	GG	GG	GG	GG	GG	GG	GG	GG
SSL2.50ch01_72337643	T	A	AA	TT	TT	AA	AA	TA	TT	AA	AA	AA	TT	AA	NN	NN	TT	TT	TA	AA	AA	TT	TT	TT	AA	TT	AA	TT	TT	TA	TT	TT	TT	TT	AA	AA	AA	AA	AA	TT	AA	AA	TT	AA	AA	AA	AA	AA	AA
SSL2.50ch01_72337738	A	G	AA	AA	AA	AA	GG	AA	AA	AA	AA	AA	AA	AA	NN	NN	AA	AA	AA	AA	AA	AA	AA	AA	AA	GG	AA	AA	GG	AA	AA	AA	AA	AA	AA	AA	AA	AA	AA	AA	AA	AA	AA	NN	AA	AA	AA	AA	AA
SSL2.50ch01_72337743	G	C	GG	GG	GG	GG	CC	GG	GG	GG	GG	GG	GG	GG	NN	NN	GG	GG	GG	GG	GG	GG	GG	GG	GG	GG	GG	GG	CC	GG	GG	GG	GG	GG	GG	GG	GG	GG	GG	GG	GG	GG	GG	NN	GG	GG	GG	GG	GG
SSL2.50ch01_72337814	T	C	TT	CC	TT	TT	TT	TT	TT	TT	TT	TT	TT	TT	NN	NN	CT	CC	TT	TT	TT	CC	TT	TT	CC	TT	TT	TT	TT	CT	CC	CC	CC	CC	TT	TT	TT	TT	TT	TT	TT	TT	TT	NN	TT	CC	CC	TT	CC
SSL2.50ch01_72351017	A	G	GG	AA	AA	AA	AA	AA	AA	AA	AA	AA	AA	AA	AA	AA	AA	AA	GA	AA	AA	AA	AA	AA	AA	AA	GA	GG	AA	GA	AA	AA	AA	AA	AA	AA	AA	AA	AA	AA	AA	AA	AA	AA	AA	AA	AA	AA	AA
SSL2.50ch01_72715880	G	A	GG	GG	GG	GG	GG	GG	GG	AA	AA	AA	GG	AA	AA	AA	GG	GG	GG	GG	GG	GG	GG	GG	GG	GG	GG	GG	GG	GG	GG	GG	GG	GG	GG	GG	GG	GG	GG	GG	GG	GG	GG	GG	GG	GG	GG	GG	GG
SSL2.50ch01_73981468	C	A	AA	CC	CC	AA	CC	CC	CC	CC	CC	CC	CC	CC	CC	NN	CC	CC	CA	AA	AA	CC	CC	CC	CC	AA	AA	CC	AA	AA	CC	CC	CC	CC	AA	AA	AA	AA	AA	AA	AA	AA	CC	AA	AA	CC	AA	AA	AA
SSL2.50ch01_74485374	G	A	AA	AA	GG	AA	GG	GG	GG	GG	GG	GG	GG	GG	GG	GG	GA	AA	GG	GG	AA	AA	GG	GG	GG	GG	GG	GG	AA	GG	AA	AA	AA	AA	GG	GG	GA	AA	GG	AA	GA	AA	AA	AA	AA	AA	GG	GG	GG
SSL2.50ch01_74488902	C	T	TT	TT	CC	TT	CC	CC	CC	CC	CC	TC	CC	TC	CC	TT	TC	TT	CC	CC	TT	NN	CC	CC	CC	CC	CC	CC	TT	CC	TT	TT	TT	TT	CC	CC	TC	TT	CC	TT	TT	TT	TT	TT	TT	TT	CC	CC	CC
SSL2.50ch01_74531782	T	C	CC	TT	TT	CC	CC	CC	TT	TT	TT	TT	NN	TT	TT	TT	TC	TT	TC	TT	CC	TT	CC	TT	CC	TT	TC	TT	CC	TT	TT	CC	TT	TT	TT	TT	CC	CC	TT	CC	TC	CC	TT	CC	CC	TT	TT	TT	TT
SSL2.50ch01_74532205	G	A	GG	GG	GG	GG	GG	GG	GG	GG	GG	GG	GG	GG	GG	GG	AG	GG	GG	GG	GG	AA	GG	AA	GG	AA	GG	AA	GG	GG	AA	GG	AA	AA	GG	AA	GG	GG	GG	GG	GG	GG	AA	GG	GG	GG	GG	GG	GG
SSL2.50ch01_74620260	G	A	GG	GG	GG	GG	GG	GG	GG	GG	GG	GG	GG	GG	GG	GG	GA	AA	GG	GG	GG	AA	GG	AA	GG	GG	GG	AA	GG	GA	AA	GG	AA	AA	GG	AA	GG	GG	GG	GG	GG	GG	AA	GG	GG	GG	GG	GG	GG
SSL2.50ch01_74653608	G	A	AA	AA	GG	GG	GG	AA	NN	AA	AA	AA	AA	AA	NN	AA	GG	NN	AA	GG	GG	GG	NN	GG	GG	GG	GG	AA	GG	GA	NN	AA	NN	GG	AA	AA	GG	GG	GG	GG	GG	GG	GG	GG	GG	AA	AA	NN	AA
SSL2.50ch01_74653708	A	G	AA	AA	AA	AA	AA	AA	NN	AA	AA	AA	AA	AA	NN	AA	GG	NN	AA	AA	AA	GG	NN	GG	AA	AA	AA	AA	AA	AA	NN	AA	NN	GG	AA	AA	AA	AA	AA	AA	AA	AA	GG	AA	AA	AA	AA	NN	AA
SSL2.50ch01_74787859	G	A	AA	GG	AA	GG	AA	GG	GG	GG	GG	GG	GG	GG	GG	GG	GG	NN	GA	GG	GG	NN	GG	NN	GG	GG	GA	AA	GG	GG	NN	AA	NN	NN	GG	GG	GG	GG	GG	AA	GG	GG	NN	GG	AA	GG	GG	GG	GG
SSL2.50ch01_74787866	T	G	TT	TT	TT	TT	TT	TG	TT	TT	TT	TG	GG	TT	TT	TT	TG	TT	TT	TT	TT	TT	GG	TT	TT	TT	TT	TT	TT	TT	TT	TT	TT	TT	TT	TT	TT	TT	TT	TT	TT	TT	TT	TT	TT	TT	TT	TT	TT
SSL2.50ch01_74787900	T	A	AA	TT	TT	TT	AA	TT	TT	TT	TT	TT	TT	TT	TT	TT	TA	AA	TA	TT	TT	AA	TT	AA	TT	TT	TA	AA	TT	TT	AA	AA	AA	AA	TT	TT	TT	TT	TT	AA	TT	TT	AA	TT	TT	TT	TT	TT	TT
SSL2.50ch01_74787956	G	A	GG	GG	GG	GG	GG	AA	GG	GG	NN	AA	AA	GG	AA	AA	AG	GG	GG	GG	GG	GG	AA	GG	GG	GG	GG	GG	GG	GG	GG	GG	GG	GG	GG	GG	GG	GG	GG	GG	GG	GG	GG	GG	GG	GG	GG	GG	GG
SSL2.50ch01_74874568	G	A	AA	GG	GG	GG	GG	GG	GG	GG	GG	GG	GG	GG	GG	GG	GG	GG	GG	GG	GG	GG	GG	GG	GG	AA	GG	GG	AA	AG	GG	GG	GG	GG	GG	GG	GG	AG	GG	GG	GG	GG	GG	GG	AA	GG	GG	GG	GG
SSL2.50ch01_74874577	G	A	GG	GG	GG	GG	GG	AA	GG	GG	GG	AG	GG	AA	GG	GG	AG	AA	GG	GG	GG	GG	AA	GG	GG	GG	GG	GG	GG	GG	GG	GG	GG	GG	GG	GG	GG	GG	GG	GG	GG	GG	AA	AA	GG	GG	GG	GG	GG
SSL2.50ch01_74998186	G	A	GG	GG	GG	GG	GG	GG	GG	GG	GG	GG	GG	GG	GG	GG	GA	GG	GA	GG	GG	AA	GG	AA	GG	GG	GA	AA	GG	GG	AA	AA	AA	AA	AA	GG	GG	GG	GG	GG	GG	GG	GG	GG	GG	GG	GG	AA	GG
SSL2.50ch01_75056641	G	C	GG	GG	GG	GG	GG	GG	GG	GG	GG	GG	GG	GG	GG	GG	GC	GG	NN	GG	GG	CC	GG	CC	GG	GG	GC	CC	GG	GG	CC	CC	CC	CC	CC	GG	GG	GG	GG	GG	GG	GG	GG	GG	GG	GG	GG	CC	GG
SSL2.50ch01_75056788	T	G	TT	TT	TT	GG	TT	NN	TT	TT	TT	TT	TT	TT	TT	TT	TT	GG	TT	TT	GG	TT	TT	TT	TT	TT	GT	TT	GG	TT	TT	TT	TT	TT	TT	GG	GT	GG	GG	TT	GG	TT	GG	GG	TT	TT	TT	TT	TT
SSL2.50ch01_75059362	G	A	GG	GG	GG	GG	AA	AA	GG	GG	GG	GA	GG	GG	GG	GG	GA	GG	GA	GG	GG	NN	GG	AA	AA	GG	GA	AA	GG	GG	AA	AA	AA	AA	AA	GG	GG	GG	GG	GG	GG	GG	GG	GG	GG	GG	GG	AA	GG
SSL2.50ch01_75059455	A	G	GG	GG	GG	AA	AA	AA	GG	AA	AA	AG	AA	AA	AA	AA	AA	AA	AA	GG	AA	AA	GG	AA	AA	GG	AA	AA	AA	GG	AA	AA	AA	AA	AA	AA	AA	AA	AA	GG	AA	AA	AA	AA	GG	GG	GG	AA	AA
SSL2.50ch01_75092640	A	T	AA	AA	AA	AA	AA	AA	AA	AA	AA	AA	AA	AA	AA	AA	TA	AA	TA	AA	AA	TT	AA	TT	AA	AA	TA	TT	AA	AA	TT	TT	TT	TT	TT	AA	AA	AA	AA	TT	AA	AA	AA	AA	AA	AA	AA	TT	AA
SSL2.50ch01_75092950	A	C	AA	AA	AA	AA	AA	AA	AA	AA	AA	AA	AA	AA	AA	AA	CC	AA	AC	AA	AA	CC	AA	CC	AA	AA	AC	CC	AA	AA	CC	CC	CC	CC	CC	AA	AA	AA	AA	CC	AA	AA	AA	AA	AA	AA	AA	CC	AA
SSL2.50ch01_75145898	C	A	AA	CC	CC	NN	CC	CC	CC	CC	CC	CC	CC	NN	NN	CC	CC	NN	NN	NN	AA	NN	CC	NN	CC	CC	AA	NN	AA	CC	CC	CC	CC	CC	AA	CC	CC	CC	AA	AA	CC	AA	NN	NN	NN	CC	CC	AA	CC
SSL2.50ch01_75145936	G	C	GG	GG	GG	NN	GG	GC	GG	CC	CC	GC	NN	NN	NN	CC	GG	GG	NN	GG	GG	NN	GG	NN	GG	GG	GG	GG	GG	GG	GG	GG	GG	GG	GG	GG	GG	GG	GG	GG	GG	GG	NN	NN	GG	GG	GG	GG	NN
SSL2.50ch01_75177490	T	A	TT	TT	TT	TT	TT	TA	TT	AA	AA	TT	TT	AA	AA	AA	TT	TT	TT	TT	TT	TT	TT	TT	TT	TT	TT	TT	TT	TT	TT	TT	TT	TT	TT	TT	TT	TT	TT	TT	TT	TT	TT	TT	TT	TT	TT	TT	TT
SSL2.50ch01_75177511	T	G	TT	TT	TT	TT	TT	TG	TT	GG	GG	TT	TT	GG	GG	GG	TT	TT	TT	TT	TT	TT	TT	TT	TT	TT	TT	TT	TT	TT	TT	TT	TT	TT	TT	TT	TT	TT	TT	TT	TT	TT	TT	TT	TT	TT	TT	TT	TT
SSL2.50ch01_75177524	T	A	TT	TT	TT	TT	TT	TA	TT	AA	AA	TT	TT	AA	AA	AA	TT	TT	TT	TT	TT	TT	TT	TT	TT	TT	TT	TT	TT	TT	TT	TT	TT	TT	TT	TT	TT	TT	TT	TT	TT	TT	TT	TT	TT	TT	TT	TT	TT
SSL2.50ch01_75177592	G	C	GG	GG	GG	GG	GG	CG	GG	CC	CC	GG	GG	CC	CC	CC	GG	GG	GG	GG	GG	GG	GG	GG	GG	GG	GG	GG	GG	GG	GG	GG	GG	GG	GG	GG	GG	GG	GG	GG	GG	GG	GG	GG	GG	GG	GG	GG	GG
SSL2.50ch01_75177606	A	T	AA	AA	AA	AA	AA	AT	AA	TT	TT	AA	AA	TT	TT	TT	AA	AA	AA	AA	AA	AA	AA	AA	AA	AA	AA	AA	AA	AA	AA	AA	AA	AA	AA	AA	AA	AA	AA	AA	AA	AA	AA	AA	AA	AA	AA	AA	AA
SSL2.50ch01_75214479	T	C	CC	TT	CC	TT	TT	CT	TT	TT	TT	CC	CC	TT	TT	TT	CT	CC	TT	CC	TT	TT	CC	TT	TT	TT	CT	CC	CC	CC	TT	TT	TT	TT	CC	CC	CC	CC	CC	TT	TT	CC	CC	CC	CC	CC	CC	CC	CC
SSL2.50ch01_75281648	G	T	GG	TG	GG	NN	TG	TG	TG	GG	TG	GG	GG	GG	GG	GG	GG	GG	NN	NN	TG	TG	TG	GG	NN	GG	TG	TG	TG	TG	TG	GG	TG	GG	NN	GG	TG	NN	GG	GG	GG	GG	GG	TT	GG	TG	GG	GG	TG
SSL2.50ch01_75281651	C	T	TC	TC	TT	NN	TC	CC	TC	CC	CC	CC	CC	CC	CC	CC	CC	CC	NN	NN	CC	CC	CC	CC	TC	CC	CC	TC	TC	TC	CC	CC	CC	CC	NN	TC	CC	NN	TC	TC	TC	TC	TC	CC	TC	CC	CC	CC	CC
SSL2.50ch01_75281676	T	A	TA	TA	AA	NN	TA	TT	TA	TT	TT	TT	TT	TT	TT	TT	TT	TT	NN	NN	TT	TT	TT	TT	TA	TT	TT	TA	TA	TA	TT	TT	TT	TT	NN	TA	TT	NN	TA	TA	TA	TA	TA	TT	TA	TT	TT	TT	TT
SSL2.50ch01_75281684	T	A	TA	TA	AA	NN	TA	TT	TA	TT	TT	TT	TT	TT	TT	TT	TT	TT	NN	NN	TT	TT	TT	TT	TA	TT	TT	TA	TA	TA	TT	TT	TT	TT	NN	TA	TT	NN	TA	TA	TA	TA	TA	TT	TA	TT	TT	TT	TT
SSL2.50ch01_75361838	C	A	AA	CC	AA	AA	CC	CC	AA	CC	CC	CC	CC	CC	CC	CC	CC	CC	CC	CC	AA	CC	CC	AA	CC	CC	CA	AA	AA	NN	AA	CC	AA	CC	AA	CC	AA	AA	AA	AA	CC	AA	CC	AA	CC	AA	AA	AA	CC
SSL2.50ch01_75361914	A	G	AA	AA	AA	AA	AA	AA	AA	GG	GG	AA	AA	AA	GG	GG	AA	AA	AA	AA	AA	AA	AA	AA	AA	AA	AA	AA	AA	AA	AA	AA	AA	AA	AA	AA	AA	AA	AA	AA	AA	AA	AA	AA	AA	AA	AA	AA	AA
SSL2.50ch01_75361917	C	T	CC	CC	CC	CC	CC	CC	CC	CC	CC	CC	CC	CC	CC	CC	CT	TT	CT	CC	CC	TT	CC	CC	CC	CC	CT	CC	CC	CC	CC	TT	CC	TT	CC	CC	CC	CC	CC	CC	CC	CC	TT	CC	CC	CC	CC	CC	CC
SSL2.50ch01_75429204	T	C	TT	TT	TT	TT	TT	TT	TT	CC	CC	TT	TT	TT	CC	CC	TT	TT	TT	TT	TT	TT	TT	TC	TT	TT	TT	TT	TT	TT	TT	TT	TT	TT	TT	TT	TT	TT	TT	TT	TT	TT	TT	TT	TT	TT	TT	TT	TT
SSL2.50ch01_75432417	G	A	GG	GG	GG	NN	GG	NN	GG	AA	AA	GG	NN	GG	AA	AA	GG	GG	NN	GG	GG	GG	GG	AA	NN	GG	NN	GG	GG	GG	GG	GG	GG	NN	GG	NN	GG	GG	GG	GG	GG	GG	GG	GG	GG	GG	GG	GG	GG
SSL2.50ch01_75609090	T	G	TT	TT	TT	TT	TT	TG	TT	TT	TT	GG	TT	GG	TT	TT	TG	TT	TT	TT	TT	TT	GG	TT	TT	TT	TT	TT	TT	TT	TT	TT	TT	TT	NN	TT	TT	TT	TT	TT	TT	TT	TT	TT	TT	TT	TT	TT	TT
SSL2.50ch01_75609181	C	A	CC	AA	CC	CC	CC	NN	AA	CC	NN	CC	CC	CC	CC	CC	CC	CC	CC	CC	CC	CC	CC	AC	CC	CC	CC	AA	CC	AA	AA	CC	AA	CC	NN	CC	CC	AC	AA	CC	AC	CC	CC	CC	CC	AA	AA	AA	AA
SSL2.50ch01_75609188	G	C	GG	GG	GG	GG	GG	GG	GG	CC	NN	GG	CC	GG	CC	CC	CG	CC	CG	GG	GG	CC	GG	CG	GG	GG	CG	GG	GG	GG	GG	CC	GG	CC	NN	GG	GG	GG	GG	GG	GG	GG	CC	GG	GG	GG	GG	GG	GG
SSL2.50ch01_75612965	A	G	AA	GG	AA	AA	AA	AG	GG	AA	AA	AA	AA	AA	AA	AA	AA	AA	AA	AA	AA	AA	AA	AA	AA	AA	AA	GG	AA	GG	GG	AA	GG	AA	GG	AA	AA	AG	GG	AA	AG	AA	AA	AA	AA	GG	GG	GG	GG
SSL2.50ch01_75619374	G	T	GG	GG	GG	GG	GG	GT	GG	GG	GG	TT	GG	TT	GG	GG	GT	GG	GG	GG	GG	GG	TT	GG	GG	GG	GG	GG	GG	GG	GG	GG	GG	GG	GG	GG	GG	GG	GG	GG	GG	GG	GG	GG	GG	GG	GG	GG	GG
SSL2.50ch01_75663229	C	A	CA	CA	CA	NN	CA	NN	CA	CA	CA	CA	CA	CA	CA	CA	CA	CA	CA	CA	CA	CA	CA	CA	CA	CA	CA	CA	CA	CA	CA	CA	CA	CA	CA	CA	CA	CA	CA	CA	CA	CA	CA	CA	CA	CA	CA	CC	CA
SSL2.50ch01_75663231	C	G	GC	GC	GC	NN	GC	GC	GC	GC	GC	GC	GC	GC	GC	GC	GC	GC	GC	GC	GC	GC	GC	GC	GC	GC	GC	GC	NN	GC	GC	GC	GC	GC	GC	GC	GC	GC	GC	GC	GC	GC	GC	GC	GC	GC	GC	CC	GC
SSL2.50ch01_75663232	C	G	GC	GC	GC	NN	GC	GC	GC	GC	GC	GC	GC	GC	GC	GC	GC	GC	GC	GC	GC	GC	GC	GC	GC	GC	GC	GC	GC	GC	GC	GC	GC	GC	GC	GC	GC	GC	GC	GC	GC	GC	GC	GC	GC	GC	GC	NN	GC
SSL2.50ch01_75663235	C	T	TC	TC	TC	NN	TC	TC	TC	TC	TC	TC	TC	TC	TC	TC	TC	TC	TC	TC	TC	TC	TC	TC	TC	TC	TC	TC	TC	TC	TC	TC	TC	TC	TC	TC	TC	TC	TC	TC	TC	TC	TC	TC	TC	TC	TC	CC	TC
SSL2.50ch01_75663325	A	C	AA	AA	AA	AA	AA	AA	AA	CC	CC	AA	CC	AA	CC	CC	AC	CC	AC	AA	AA	CC	AA	NN	AA	AA	AC	AA	AA	AA	AA	CC	AA	CC	AA	AA	AA	AA	AA	AA	AA	AA	CC	AA	AA	AA	AA	AA	AA
SSL2.50ch01_75693122	C	T	CC	CC	CC	CC	CC	CC	CC	NN	NN	CC	CC	CC	NN	NN	CC	CC	TC	TT	CC	CC	NN	CC	CC	CC	CC	CC	CC	CC	CC	CC	CC	CC	CC	CC	CC	CC	CC	CC	CC	CC	CC	CC	CC	CC	CC	CC	CC
SSL2.50ch01_75737538	C	T	CC	CC	CC	CC	CC	CC	CC	CC	CC	CC	CC	CC	CC	CC	CC	CC	CC	CC	CC	CC	CC	CC	CC	CC	CC	TT	CC	TC	CC	CC	CC	CC	TT	CC	CC	CC	CC	CC	CC	CC	CC	CC	CC	TT	TT	TT	CC
SSL2.50ch01_75737604	C	T	CT	CT	CT	CT	CT	CC	CC	CT	CC	CC	CC	CC	CC	CT	CT	CT	CT	CT	CC	CT	CT	CC	CT	CC	CT	CT	CC	CC	CT	CT	CT	TT	CC	CT	CT	CT	CT	CT	CT	CC	CT	CT	CT	CT	CC	CC	CT
SSL2.50ch01_75737605	C	T	CT	CT	CT	CT	CT	CC	CC	CT	CC	CC	CC	CC	CC	CT	CT	CT	CT	CT	CC	CT	CT	CC	CT	CC	CT	CT	CC	CC	CT	CT	CT	TT	CC	CT	CT	CT	CT	CT	CT	CC	CT	CT	CT	CT	CC	CC	CT
SSL2.50ch01_75737606	T	G	GT	GT	GT	GT	GT	TT	TT	GT	TT	TT	TT	TT	TT	GT	GT	GT	GT	GT	TT	GT	GT	TT	GT	TT	GT	GT	TT	TT	GT	GT	GT	GG	TT	GT	GT	GT	GT	GT	GT	TT	GT	GT	GT	GT	TT	TT	GT
SSL2.50ch01_75737608	A	T	AT	AT	AT	AT	AT	AA	AA	AT	AA	AA	AA	AA	AA	AT	AT	AT	AT	AT	AA	AT	AT	AA	AT	AA	AT	AT	AA	AA	AT	AT	AT	TT	AA	AT	AT	AT	AT	AT	AT	AA	AT	AT	AT	AT	AA	AA	AT
SSL2.50ch01_75737624	C	T	CT	CT	CT	CT	CT	CC	CC	CT	CC	CC	CC	CC	CC	CT	CT	CT	CT	CT	CC	CT	CT	CC	CT	CC	CT	CT	CC	CC	CT	CT	CT	TT	CC	CT	CT	CT	CT	CT	CT	CC	CT	CT	CT	CT	CC	CC	CT
SSL2.50ch01_75737645	G	A	AG	AG	AG	AG	AG	GG	GG	AG	GG	GG	GG	GG	GG	AG	AG	AG	AG	AG	GG	AG	AG	GG	AG	GG	AG	AG	GG	GG	AG	AG	AG	AA	GG	AG	AG	AG	AG	AG	AG	GG	AG	AG	AG	AG	GG	GG	AG
SSL2.50ch01_75737650	T	A	AT	AT	AT	AT	AT	TT	TT	AT	TT	TT	TT	TT	TT	AT	AT	AT	AT	AT	TT	AT	AT	TT	AT	TT	AT	AT	TT	TT	AT	AT	AT	AA	TT	AT	AT	AT	AT	AT	AT	TT	AT	AT	AT	AT	TT	TT	AT
SSL2.50ch01_75737653	A	C	AC	AC	AC	AC	AC	AA	AA	AC	AA	AA	AA	AA	AA	AC	AC	AC	AC	AC	AA	AC	AC	AA	AC	AA	AC	AC	AA	AA	AC	AC	AC	CC	AA	AC	AC	AC	AC	AC	AC	AA	AC	AC	AC	AC	AA	AA	AC
SSL2.50ch01_75737658	T	G	GT	GT	GT	GT	GT	TT	TT	GT	TT	TT	TT	TT	TT	GT	GT	GT	GT	GT	TT	GT	GT	TT	GT	TT	GT	GT	TT	TT	GT	GT	GT	GG	TT	GT	GT	GT	GT	GT	GT	TT	GT	GT	GT	GT	TT	TT	GT
SSL2.50ch01_75737673	C	T	CT	CT	CT	CT	CT	CC	CC	CT	CC	CC	CC	CC	CC	CT	CT	CT	CT	CT	CC	CT	CT	CC	CT	CC	CT	CT	CC	CC	CT	CT	CT	TT	CC	CT	CT	CT	CT	CT	CT	CC	CT	CT	CT	CT	CC	CC	CT
SSL2.50ch01_75737682	C	T	CC	CC	CC	CC	CC	NN	NN	CT	TT	TT	NN	NN	TT	CT	CT	CC	CC	CC	NN	CC	CT	TT	CC	NN	CC	CC	CC	CC	CC	CC	CC	CC	NN	CC	CC	CC	CC	CC	CC	CC	CC	CC	CC	CC	CC	NN	CC
SSL2.50ch01_75792575	T	G	TT	TT	TT	TT	TT	TT	TT	GG	GG	TG	GG	TT	GG	GG	TG	TT	TT	TT	TT	TT	GG	GG	TT	TT	TT	TT	TT	TT	TT	TT	TT	TT	TT	TT	TT	TT	TT	TT	TT	TT	TT	TT	TT	TT	TT	TT	TT
SSL2.50ch01_75792582	A	G	AA	AA	AA	AA	AA	GA	AA	GG	GG	GG	GG	GG	GG	GG	GA	AA	AA	AA	AA	AA	GG	GG	AA	AA	AA	AA	AA	AA	AA	AA	AA	AA	AA	AA	AA	AA	AA	AA	AA	AA	AA	AA	AA	AA	AA	AA	AA
SSL2.50ch01_75792594	A	G	AA	AA	GG	AA	AA	AA	AA	AA	AA	AA	AA	AA	AA	AA	AA	AA	GA	GG	GG	AA	AA	AA	AA	GG	AA	AA	GG	AA	AA	AA	AA	AA	AA	GG	GA	AA	AA	GG	AA	GG	AA	GG	AA	AA	AA	AA	GG
SSL2.50ch01_75792708	T	A	TT	TT	TT	TT	TT	AT	TT	AA	AA	AA	AA	AA	AA	AA	AT	TT	TT	AT	TT	AT	AA	AT	TT	TT	TT	TT	TT	TT	TT	TT	TT	TT	TT	TT	TT	TT	TT	TT	TT	TT	TT	TT	TT	TT	TT	TT	TT
SSL2.50ch01_75843798	G	C	GG	GG	GG	GG	GG	GG	GG	CC	CC	GG	GG	GG	CC	CC	GG	GG	GG	GG	GG	GG	GG	GC	GG	GG	GG	GG	GG	GC	GG	GG	GG	GG	GG	CC	GG	GG	GG	GG	GG	GG	GG	GG	GG	GG	GG	GG	GG
SSL2.50ch01_75843806	T	A	TT	TT	TT	TT	TT	TT	TT	AA	AA	TT	TT	TT	AA	AA	TT	TT	TT	TT	TT	TT	TT	TA	TT	TT	TT	TT	TT	TA	TT	TT	TT	TT	TT	AA	TT	TT	TT	TT	TT	TT	TT	TT	TT	TT	TT	TT	TT
SSL2.50ch01_75843849	A	T	AA	AA	AA	AA	AA	AA	AA	TT	TT	AA	AA	AA	TT	TT	AA	AA	AA	AA	AA	AA	AA	TA	AA	AA	AA	AA	AA	TA	AA	AA	AA	AA	AA	TT	AA	AA	AA	AA	AA	AA	AA	AA	AA	AA	AA	AA	AA
SSL2.50ch01_75843850	A	T	AA	AA	AA	AA	AA	AA	AA	TT	TT	AA	AA	AA	TT	TT	AA	AA	AA	AA	AA	AA	AA	TA	AA	AA	AA	AA	AA	TA	AA	AA	AA	AA	AA	TT	AA	AA	AA	AA	AA	AA	AA	AA	AA	AA	AA	AA	AA
SSL2.50ch01_75873626	T	A	TT	TT	TT	TT	TT	TT	TT	AA	AA	TT	TT	TT	AA	AA	TT	TT	TA	TT	AA	TT	TT	AA	TT	TT	TA	TT	TT	TT	TT	AA	TT	TT	TT	TT	TT	TA	AA	TT	TA	TT	TT	TT	TT	TT	TT	TT	TT
SSL2.50ch01_75873627	A	T	AA	AA	AA	AA	AA	TA	TT	AA	AA	TA	AA	TT	AA	AA	TA	TT	TA	TT	AA	TT	AA	AA	AA	AA	TA	AA	AA	TT	TT	AA	TT	TT	AA	TT	TA	TA	AA	TT	TA	TT	TT	TT	AA	TT	TT	AA	TT
SSL2.50ch01_75881953	A	G	AA	AA	GG	GG	AA	AA	AA	AA	AA	AA	AA	AA	AA	AA	AA	AA	AA	NN	AA	AA	AA	AA	AA	AA	AA	AA	AA	AA	AA	AA	AA	AA	AA	AA	GA	AA	AA	AA	AA	AA	AA	AA	AA	AA	AA	AA	AA
SSL2.50ch01_75881990	G	A	GG	GG	GG	GG	GG	GG	GG	GG	GG	GG	GG	GG	GG	GG	GG	GG	GG	NN	AA	GG	GG	GG	GG	AA	GG	GG	GG	GA	GG	GG	GG	GG	GG	AA	GG	GA	AA	GG	GG	GG	GG	GG	GG	GG	GG	GG	GG
SSL2.50ch01_76194451	G	A	AA	GG	AA	GG	GG	GG	GG	GG	GG	GG	GG	GG	GG	GG	GG	GG	GG	GG	GG	GG	GG	GG	AA	AA	GA	GG	GG	GA	GG	GG	GG	GG	GG	GG	GA	GA	GG	GG	GA	GG	GG	GG	GG	GG	AA	GG	GG
SSL2.50ch01_76194557	G	A	GG	GG	GG	GG	AA	AG	GG	AA	AA	GG	GG	AA	GG	GG	GG	GG	GG	GG	GG	GG	GG	GG	GG	GG	GG	GG	GG	AG	GG	GG	GG	GG	GG	GG	AG	GG	GG	GG	AG	AA	GG	GG	GG	GG	GG	GG	GG
SSL2.50ch01_76197906	A	C	CC	AA	CC	AA	CC	CA	AA	CC	CC	CC	CC	CC	CC	AA	CA	AA	AA	AA	AA	AA	CC	AA	CC	CC	CA	AA	AA	CC	AA	AA	AA	AA	AA	AA	CC	CA	AA	AA	CC	CC	AA	AA	AA	AA	CC	AA	AA
SSL2.50ch01_76225402	T	G	TT	TT	GG	TT	TT	NN	TT	TT	NN	TT	TT	TT	NN	NN	TT	TT	TT	TT	TT	TT	TT	NN	GG	NN	GT	TT	TT	NN	TT	TT	TT	TT	TT	TT	GG	GT	TT	TT	NN	TT	TT	TT	TT	TT	TT	NN	TT
SSL2.50ch01_76266164	C	T	CC	CC	CC	CC	CC	CT	CC	CC	CC	CT	CC	TT	CC	CC	CT	CC	CC	CC	CC	CC	TT	CC	CC	CC	CC	CC	CC	CC	CC	CC	CC	CC	CC	CC	CC	CC	CC	CC	CC	CC	CC	CC	CC	CC	CC	CC	CC
SSL2.50ch01_76266227	G	A	GG	AA	GG	GG	GG	AA	GG	AA	AA	AA	AA	AA	AA	GG	AG	GG	GG	GG	GG	GG	AA	GG	GG	GG	AG	GG	GG	GG	GG	GG	GG	GG	GG	GG	GG	GG	GG	GG	GG	GG	GG	GG	GG	GG	GG	AA	GG
SSL2.50ch01_76305589	T	A	NN	TT	TT	TT	TT	TT	TT	TT	NN	TT	TT	TT	TT	TT	TT	TT	TT	TT	TT	TT	TT	TT	AA	TT	TT	TT	TT	TT	TT	TT	TT	TT	TT	AA	TA	AA	AA	TT	TA	TT	TT	TT	TT	AA	TT	AA	AA
SSL2.50ch01_76305718	G	A	NN	AA	AA	AA	AA	GG	AA	GG	GG	GG	GG	GG	GG	GG	GG	AA	AA	AA	AA	AA	GG	GG	GG	AA	AA	GG	AA	AG	AA	GG	AA	AA	GG	GG	AG	GG	GG	GG	GG	AA	AA	AA	AA	GG	GG	GG	GG
SSL2.50ch01_76352929	G	C	GG	GG	CC	CC	GG	GG	GG	GG	GG	CC	CC	GG	CC	GG	CG	GG	GG	GG	CC	GG	CC	GG	CC	GG	CG	GG	GG	CG	GG	GG	GG	GG	GG	GG	CC	CG	GG	CC	CG	GG	GG	CC	GG	GG	GG	GG	GG
SSL2.50ch01_76360869	G	A	GG	GG	AA	AA	GG	GG	GG	GG	GG	GG	GG	GG	GG	GG	GG	GG	GG	GG	AA	GG	GG	GG	AA	GG	AG	GG	GG	AG	GG	GG	GG	GG	GG	GG	AA	AG	GG	AA	GG	GG	GG	AA	GG	GG	GG	GG	GG
SSL2.50ch01_76368232	G	T	TT	TT	GG	GG	TT	GG	GG	GG	GG	GG	GG	GG	GG	GG	TG	TT	TT	TT	GG	TT	GG	TG	GG	GG	TG	GG	GG	TG	TT	TT	TT	TT	TT	GG	GG	GG	GG	GG	GG	GG	TT	GG	GG	TT	TT	GG	TG
SSL2.50ch01_76389298	G	T	GG	GG	TT	GG	GG	GG	GG	GG	GG	GG	GG	GG	GG	NN	GG	GG	TG	TT	TT	GG	GG	GG	GG	GG	GG	TT	GG	TG	GG	GG	GG	GG	GG	GG	TG	TG	GG	TT	GG	TT	GG	GG	TT	GG	GG	TT	GG
SSL2.50ch01_76397768	T	A	AA	AA	TT	TT	TT	TT	AA	TT	TT	TT	TT	TT	TT	TT	TT	TT	TT	TT	TT	TT	TT	TT	TT	TT	AT	TT	TT	TT	TT	TT	TT	TT	TT	TT	TT	TT	TT	TT	TT	TT	TT	TT	TT	TT	TT	TT	TT
SSL2.50ch01_76397774	G	A	AA	GG	GG	GG	GG	GG	GG	GG	GG	GG	GG	GG	GG	GG	GG	GG	GG	GG	GG	GG	GG	GG	GG	GG	AG	GG	GG	GG	GG	GG	GG	GG	GG	GG	GG	GG	GG	GG	GG	GG	GG	GG	GG	GG	GG	GG	GG
SSL2.50ch01_76447438	G	A	GG	GG	GG	AA	GG	GG	GG	GG	GG	GA	GG	GG	GG	GG	AA	AA	GG	GG	GG	GG	NN	GG	GG	GG	NN	GG	GG	GG	GG	AA	GG	GG	GG	NN	GG	GG	GG	GG	GA	GG	AA	GG	GG	AA	GG	GG	GG
SSL2.50ch01_76449216	G	T	GG	GG	GG	TT	GG	NN	GG	GG	GG	GG	GG	GG	GG	GG	NN	TT	GG	GG	GG	GG	GG	GG	GG	GG	GG	GG	GG	GG	GG	TT	GG	GG	GG	GG	GG	GG	GG	GG	GG	GG	TT	GG	GG	TT	GG	GG	GG
SSL2.50ch01_76449273	G	C	GG	GG	GG	GG	GG	NN	GG	GG	GG	GG	GG	GG	GG	GG	GG	GG	GC	GG	GG	CC	GG	GC	GG	GG	GG	GG	GG	GG	CC	GG	CC	CC	GG	GG	GG	GG	GG	GG	GG	GG	GG	GG	GG	GG	GG	GG	GG
SSL2.50ch01_76458519	T	A	TT	TT	AA	TT	TT	TT	TT	TT	TT	TT	TT	TT	TT	TT	TA	AA	TA	TT	TT	AA	TT	TT	TT	TT	TA	AA	TT	TT	TT	AA	TT	TT	TT	TT	TT	TT	TT	TT	TT	TT	TT	TT	TT	AA	TT	TT	TT
SSL2.50ch01_76472990	G	A	GG	GG	GG	GG	GG	GA	GG	AA	AA	AA	AA	AA	GG	GG	GA	GG	GG	GG	GG	GG	AA	GG	GG	GG	GA	GG	GG	GG	GG	GG	GG	GG	GG	GG	GG	GG	GG	GG	GG	GG	GG	GG	GG	GG	GG	GG	GG
SSL2.50ch01_76508234	C	T	CC	TT	CC	CC	CC	CC	TT	CC	CC	CC	CC	CC	CC	CC	CC	CC	CC	CC	CC	CC	CC	TC	TT	CC	TC	CC	TT	CC	TT	CC	TT	TT	CC	CC	CC	TC	TT	TT	TC	TT	CC	CC	TT	TT	CC	CC	CC
SSL2.50ch01_76508239	A	T	AA	TT	AA	AA	AA	AA	TT	AA	AA	AA	AA	AA	AA	AA	AA	AA	AA	AA	AA	AA	AA	TA	TT	AA	TA	AA	TT	AA	TT	AA	TT	TT	AA	AA	AA	TA	TT	TT	TA	TT	AA	AA	TT	TT	AA	AA	AA
SSL2.50ch01_76508245	G	A	GG	AA	GG	GG	GG	GG	AA	GG	GG	GG	GG	GG	GG	GG	GG	GG	GG	GG	GG	GG	GG	GA	AA	GG	GA	GG	AA	GG	AA	GG	AA	AA	GG	GG	GG	GA	AA	AA	GA	AA	GG	GG	AA	AA	GG	GG	GG
SSL2.50ch01_76508297	G	A	GG	AA	GG	GG	GG	GG	AA	GG	GG	GG	GG	GG	GG	GG	GG	GG	GG	GG	GG	GG	GG	GA	GG	GG	GG	GG	GG	GG	AA	GG	AA	GG	GG	GG	GG	GG	GG	GG	GG	GG	GG	GG	GG	GG	GG	GG	GG
SSL2.50ch01_76582726	C	T	CC	CC	CC	CC	CC	TC	CC	TT	TT	TT	TT	TT	TT	TT	TC	CC	CC	CC	CC	CC	TT	TT	CC	CC	TC	CC	CC	CC	CC	CC	CC	CC	CC	CC	CC	CC	CC	CC	CC	CC	CC	CC	CC	CC	CC	CC	CC
SSL2.50ch01_76582755	T	C	TT	CC	CC	TT	TT	TT	TT	TT	TT	TT	TT	TT	TT	TT	TC	CC	TC	TT	TT	TT	TT	TT	TT	TT	TC	TT	TT	TT	TT	CC	TT	CC	TT	TT	TT	TT	TT	TT	TT	TT	CC	TT	TT	TT	TT	TT	TT
SSL2.50ch01_76582800	C	T	CC	CC	CC	CC	CC	CT	CC	TT	TT	TT	TT	TT	TT	TT	CT	CC	CC	CC	CC	CC	TT	TT	CC	CC	CT	CC	CC	CC	CC	CC	CC	CC	CC	CC	CC	CC	CC	CC	CC	CC	CC	CC	CC	CC	CC	CC	CC
SSL2.50ch01_76586918	T	C	TT	CC	CC	TT	TT	TT	TT	TT	NN	TT	TT	TT	TT	TT	TC	CC	TC	TT	TT	TT	TT	TT	TT	TT	TC	TT	TT	TT	TT	CC	TT	CC	TT	TT	TT	TT	TT	TT	TT	TT	CC	TT	TT	TT	TT	TT	TT
SSL2.50ch01_76587001	C	T	CC	CC	CC	CC	CC	CC	CC	TT	TT	TT	TT	TT	TT	TT	CT	CC	CC	CC	CC	CC	TT	NN	CC	CC	CT	CC	CC	CC	CC	CC	CC	CC	CC	CC	CC	CC	CC	CC	CC	CC	CC	CC	CC	CC	CC	CC	CC
SSL2.50ch01_76596659	A	G	AA	AA	AA	AA	AA	AG	AA	GG	GG	GG	GG	GG	GG	GG	AG	AA	AA	AA	AA	AA	GG	GG	AA	AA	AG	AA	AA	AA	AA	AA	AA	AA	AA	AA	AA	AA	AA	AA	AA	AA	AA	AA	AA	AA	AA	AA	AA
SSL2.50ch01_76643892	C	T	TT	CC	TT	TT	TT	CC	CC	CC	CC	CC	TT	CC	CC	CC	CC	CC	CC	CC	CC	CC	CC	CC	TT	CC	CC	CC	CC	TC	CC	CC	CC	CC	TT	CC	TC	CC	CC	CC	CC	CC	CC	CC	CC	CC	CC	CC	CC
SSL2.50ch01_76643964	T	C	TT	CC	TT	TT	TT	TT	TT	TT	TT	TT	TT	TT	TT	TT	CT	CC	CT	TT	TT	CC	TT	TT	TT	TT	CT	CC	TT	CT	CC	CC	CC	CC	TT	CC	TT	CT	TT	TT	TT	TT	CC	TT	TT	CC	CC	TT	CC
SSL2.50ch01_76702150	T	A	TT	TT	TT	TT	TT	AA	TT	AA	AA	AA	AA	AA	AA	AA	AT	TT	TT	TT	TT	TT	AA	NN	TT	TT	TT	TT	TT	TT	TT	TT	TT	TT	TT	TT	TT	TT	TT	TT	TT	TT	TT	TT	TT	TT	TT	TT	TT
SSL2.50ch01_76743370	C	T	CC	CC	CC	CC	CC	CT	CC	TT	TT	CT	TT	TT	TT	TT	CT	CC	CC	CC	CC	CC	TT	CT	CC	CC	CC	CC	CC	CC	CC	CC	CC	CC	CC	CC	CC	CC	CC	CC	CC	CC	CC	CC	CC	CC	CC	CC	CC
SSL2.50ch01_76761521	G	A	GG	AA	GG	NN	GG	GA	AA	AA	NN	GA	AA	GG	NN	AA	NN	GG	GG	GG	GG	GG	AA	AA	AA	AA	GG	GG	NN	GG	NN	GG	GG	GG	GG	AA	AA	NN	GG	GG	GA	GG	AA	GG	GG	AA	GG	AA	AA
SSL2.50ch01_76761614	A	G	AA	GG	AA	AA	AA	AG	GG	GG	GG	AG	GG	AA	GG	GG	AG	AA	AA	AA	AA	AA	GG	GG	GG	GG	AA	AA	AA	AA	AA	AA	AA	AA	AA	GG	AA	AA	AA	AA	AG	AA	GG	AA	AA	GG	AA	GG	GG
SSL2.50ch01_76783254	C	G	CC	CC	CC	CC	CC	NN	GG	GG	GG	GG	CC	GG	GG	GG	GG	CC	CC	CC	CC	CC	GG	GG	CC	CC	CC	NN	CC	GC	CC	GG	CC	CC	CC	CC	CC	CC	CC	CC	CC	CC	CC	GG	CC	CC	GG	CC	CC
SSL2.50ch01_76783306	C	T	CC	TT	CC	CC	CC	NN	CC	CC	CC	CC	CC	CC	CC	CC	CC	TT	TC	CC	CC	TT	CC	CC	CC	CC	CC	NN	CC	CC	TT	CC	TT	CC	CC	CC	CC	CC	CC	CC	CC	CC	TT	CC	CC	CC	CC	TT	CC
SSL2.50ch01_76803070	A	G	AA	AA	AA	GG	AA	GA	GG	AA	AA	GG	GG	GG	AA	AA	GA	AA	AA	AA	GG	AA	GG	GA	GG	AA	AA	AA	AA	AA	AA	GG	AA	AA	AA	AA	GA	GG	GG	AA	AA	AA	AA	AA	AA	AA	AA	AA	AA
SSL2.50ch01_76803097	T	G	TT	TT	TT	GG	TT	GG	GG	GG	GG	GG	GG	GG	GG	GG	TG	TT	TT	TT	GG	TT	GG	TG	GG	TT	TT	TT	TT	TT	TT	GG	TT	TT	TT	TT	TG	GG	GG	TT	TT	TT	TT	TT	TT	TT	TT	TT	TT
SSL2.50ch01_76803244	A	T	AA	AA	AA	TT	AA	AT	TT	AA	NN	TT	TT	TT	AA	AA	NN	AA	AA	AA	TT	AA	TT	TT	TT	AA	AA	AA	AA	AA	AA	TT	AA	AA	AA	AA	AT	TT	TT	AA	AA	AA	AA	AA	AA	AA	AA	AA	AA
SSL2.50ch01_76803264	C	G	CC	CC	CC	GG	CC	CG	GG	CC	NN	CG	CC	GG	CC	CC	NN	CC	CC	CC	CC	CC	GG	GG	CC	CC	CC	CC	CC	CC	CC	GG	CC	CC	CC	CC	CG	CC	CC	CC	CC	CC	CC	CC	CC	CC	CC	CC	CC
SSL2.50ch01_76805282	A	G	AA	AA	AA	AA	AA	AA	AA	AA	AA	AA	AA	AA	AA	AA	AA	AA	AA	AA	AA	NN	AA	AA	AA	AA	AA	AA	AA	AA	AA	AA	AA	AA	AA	AA	AA	AA	AA	AA	AA	AA	AA	AA	AA	AA	AA	AA	AA
SSL2.50ch01_76809871	G	A	GG	GG	GG	AA	GG	NN	AA	NN	AA	GG	GG	AA	AA	AA	GG	GG	GA	GG	GG	NN	GG	GA	GG	GG	GG	GG	GG	GG	GG	AA	GG	GG	GG	AA	GG	GG	GG	GG	GG	GG	GG	NN	GG	GG	GG	NN	GG
SSL2.50ch01_76809977	C	T	CC	CC	CC	TT	CC	CC	TT	CC	CC	CC	CC	CC	CC	CC	CC	CC	CT	CC	CC	CC	CC	CC	CC	CC	CC	CC	CC	CC	CC	TT	CC	CC	CC	CC	CC	CC	CC	CC	CC	CC	CC	CC	CC	CC	CC	CC	CC
SSL2.50ch01_76870377	C	G	GG	GG	GG	CC	CC	CC	GG	CC	CC	CC	GG	CC	CC	CC	CG	CC	CC	CC	GG	CC	CC	CC	CC	GG	CC	CC	GG	CC	CC	GG	CC	CC	CC	CC	GG	CG	GG	CC	CC	GG	CC	CC	GG	CC	CC	CC	CC
SSL2.50ch01_76872336	A	T	TT	TT	TT	NN	AA	TT	TT	TT	NN	TT	TT	TT	TT	TT	TT	AA	TA	TT	TT	AA	TT	TT	AA	TT	NN	AA	TT	TA	AA	TT	AA	AA	AA	NN	TT	TA	TT	AA	AA	TT	AA	AA	TT	AA	AA	AA	AA
SSL2.50ch01_76872337	A	T	AA	TT	AA	NN	AA	TT	TT	TT	NN	TT	TT	TT	AA	AA	TT	AA	TA	TT	AA	AA	TT	AA	AA	AA	NN	AA	AA	TA	AA	TT	AA	AA	AA	NN	TA	AA	AA	AA	AA	TT	AA	AA	AA	AA	AA	AA	AA
SSL2.50ch01_76872338	A	T	AA	TT	AA	NN	AA	AA	TT	AA	NN	AA	AA	AA	AA	AA	TA	AA	AA	AA	AA	AA	AA	AA	AA	AA	NN	AA	AA	AA	AA	TT	AA	AA	AA	NN	AA	AA	AA	AA	AA	AA	AA	AA	AA	AA	AA	AA	AA
SSL2.50ch01_77028345	C	G	CC	NN	CC	NN	CC	CC	NN	CC	CC	CC	CC	CC	CC	CC	CC	CC	CC	CC	CC	GG	CC	CC	NN	CC	CC	CC	CC	CC	GG	CC	GG	CC	CC	CC	CC	CC	CC	CC	CC	CC	CC	CC	CC	CC	NN	CC	CC
SSL2.50ch01_77039873	A	C	AA	AA	AA	AA	AA	CC	AA	NN	CC	NN	CC	CC	CC	CC	AA	AA	AA	AA	AA	AA	NN	AC	CC	AA	AA	AA	AA	AA	AA	AA	AA	AA	AA	AA	AA	AA	AA	CC	AA	AA	AA	AA	AA	AA	AA	AA	AA
SSL2.50ch01_77066306	G	C	GG	GG	GG	NN	GG	GG	GG	GG	GG	GG	CC	GG	GG	GG	GG	GG	GG	CC	GG	NN	GG	GG	GG	GG	GG	GG	CC	GC	GG	GG	GG	GG	GG	GG	GG	GG	CC	CC	CC	GG	GG	GG	GG	GG	CC	GG	GG
SSL2.50ch01_77079900	C	T	CC	CC	CC	CC	CC	CC	CC	CC	CC	CC	CC	CC	CC	CC	CC	CC	CC	CC	CC	CC	CC	CC	TT	CC	CC	CC	CC	CC	CC	CC	CC	CC	CC	CC	CC	TC	CC	CC	CC	CC	CC	CC	CC	CC	CC	CC	CC
SSL2.50ch01_77090082	A	G	GG	GG	GG	GG	AA	AA	GG	AA	AA	AA	AA	AA	AA	AA	AA	GG	AG	AA	AA	AA	AA	AA	AA	GG	GG	GG	AA	AG	AA	AA	AA	AA	GG	GG	AG	AA	AA	AA	AA	GG	GG	GG	AA	AA	AA	GG	AA
SSL2.50ch01_77111408	T	A	TT	TT	TT	TT	TT	AA	TT	AA	AA	TA	TT	AA	AA	AA	TA	TT	TT	TT	TT	TT	AA	AA	TT	TT	TT	TT	TT	TT	TT	TT	TT	TT	TT	TT	TT	TT	TT	TT	TT	TT	TT	TT	TT	TT	TT	TT	TT
SSL2.50ch01_77111443	T	C	TT	TT	TT	TT	CC	TT	TT	TT	TT	TT	TT	TT	TT	TT	CT	TT	CT	CC	CC	CC	TT	TT	CT	TT	TT	TT	TT	TT	CC	TT	CC	CC	TT	TT	CT	CC	CC	CC	TT	TT	TT	TT	TT	CC	TT	TT	CC
SSL2.50ch01_77199119	T	C	TT	TT	TT	TT	CC	TT	TT	TT	TT	CC	TT	TT	TT	CC	TC	TT	TT	TT	TT	TT	CC	TC	CC	TT	TT	TT	TT	TC	TT	TT	TT	TT	TT	TT	TT	TT	TT	TT	TT	TT	TT	TT	TT	CC	CC	TT	TT
SSL2.50ch01_77201620	T	A	TT	TT	TT	TT	AA	TT	TT	TT	TT	TA	TT	TT	TT	TT	TA	TT	TT	TT	TT	TT	AA	TT	AA	TT	TT	TT	TT	TA	TT	TT	TT	TT	TT	TT	TT	TA	AA	TT	TT	TT	TT	TT	TT	AA	AA	TT	TT
SSL2.50ch01_77201736	A	G	AA	AA	AA	AA	AA	AA	AA	GG	GG	AA	AA	AA	GG	AA	AA	AA	AA	AA	AA	AA	AA	AA	AA	AA	AA	AA	AA	AA	AA	AA	AA	AA	AA	AA	AA	AA	AA	AA	AA	AA	AA	AA	AA	AA	AA	AA	AA
SSL2.50ch01_77240115	C	T	TT	CC	CC	NN	CC	CC	CC	CC	CC	CC	CC	CC	CC	NN	CC	TT	TT	CC	CC	CC	CC	NN	CC	CC	NN	TC	CC	CC	NN	CC	CC	TT	CC	CC	CC	CC	CC	TT	CC	CC	TT	CC	CC	CC	CC	CC	CC
SSL2.50ch01_77240217	T	A	TT	TT	TT	TT	TT	AT	TT	TT	TT	TT	TT	TT	TT	AA	TT	TT	TT	TT	TT	TT	AA	AA	AA	TT	TT	TT	TT	TT	NN	TT	TT	TT	TT	TT	TT	TT	TT	TT	AT	TT	TT	TT	TT	TT	TT	TT	TT
SSL2.50ch01_77240259	C	G	GG	CC	CC	CC	CC	CC	CC	GG	GG	CG	CC	CC	GG	CC	CC	GG	CG	CC	CC	CC	CC	CC	CC	CC	GG	CG	CC	CC	NN	CC	CC	GG	CC	CC	CG	CC	CC	GG	CC	CC	GG	CC	CC	CC	CC	CC	CC
SSL2.50ch01_77251201	G	A	GG	GG	GG	GG	GG	AG	GG	GG	GG	AG	GG	GG	GG	GG	GG	GG	AG	AA	GG	GG	GG	GG	GG	GG	GG	GG	GG	GG	GG	GG	GG	GG	GG	GG	GG	GG	GG	GG	GG	GG	GG	GG	GG	AA	GG	GG	GG
SSL2.50ch01_77290999	G	C	GG	GG	GG	GG	GG	CG	GG	GG	GG	CC	CC	CC	GG	GG	CC	CC	CG	GG	GG	CC	GG	CG	GG	GG	CC	GG	CC	CG	CC	GG	CC	CC	GG	GG	GG	GG	GG	CC	GG	GG	CC	GG	GG	GG	GG	GG	GG
SSL2.50ch01_77317017	C	T	CC	TT	CC	CC	TT	CC	CC	CC	CC	CC	CC	CC	CC	CC	CC	CC	TC	TT	CC	CC	CC	CC	CC	TT	CC	CC	CC	CC	CC	TT	CC	CC	CC	TT	TC	CC	CC	TT	TT	CC	CC	TT	CC	CC	CC	CC	CC
SSL2.50ch01_77363319	T	C	TT	CC	CC	CC	CC	CC	CC	TT	TT	TC	CC	CC	TT	TT	TC	TT	TC	CC	TT	TT	TT	TT	TT	CC	NN	TC	CC	CC	TT	CC	TT	TT	CC	CC	CC	TC	TT	CC	TC	TT	TT	CC	CC	TT	CC	TT	CC
SSL2.50ch01_77385732	A	G	AA	AA	AA	AA	AA	AA	GG	AA	AA	AA	AA	AA	AA	AA	NN	NN	AA	AA	AA	AA	AA	NN	AA	NN	NN	NN	NN	AA	AA	AA	AA	AA	AA	NN	AA	AA	AA	AA	AA	AA	GG	AA	AA	AA	AA	AA	AA
SSL2.50ch01_77390027	C	T	CC	TT	TT	CC	CC	CC	CC	CC	NN	CC	CC	CC	CC	CC	CC	CC	CC	CC	CC	CC	CC	CC	CC	CC	CC	CC	CC	CC	CC	CC	CC	TT	NN	TT	CC	CC	CC	CC	CC	CC	CC	CC	CC	CC	CC	CC	CC
SSL2.50ch01_77390193	T	A	TT	TT	TT	TT	TT	TT	AA	TT	TT	TT	TT	TT	TT	TT	AT	TT	TT	TT	TT	TT	TT	TT	TT	TT	AT	TT	TT	TT	TT	TT	TT	TT	TT	TT	TT	TT	TT	TT	TT	TT	AA	TT	TT	TT	TT	TT	TT
SSL2.50ch01_77414760	G	T	GG	GG	GG	NN	GG	NN	GG	GG	NN	GT	GG	TT	GG	TT	GG	TT	TT	GG	GG	NN	TT	NN	GG	GG	GG	TT	GG	GG	GG	GG	GG	GG	GG	NN	GG	GG	GG	NN	TT	GG	GG	GG	TT	GG	GG	GG	TT
SSL2.50ch01_77416324	C	T	CC	CC	CC	CC	CC	CT	CC	CC	CC	CC	CC	TT	CC	TT	CC	CC	CC	CC	CC	CC	TT	CC	CC	CC	CC	CC	CC	CC	CC	CC	CC	CC	CC	CC	CC	CC	CC	CC	CT	CC	CC	CC	CC	CC	CC	CC	CC
SSL2.50ch01_77416325	C	T	CC	CC	CC	CC	CC	CT	CC	CC	CC	CC	CC	TT	CC	TT	CC	CC	CC	CC	CC	CC	TT	CC	CC	CC	CC	CC	CC	CC	CC	CC	CC	CC	CC	CC	CC	CC	CC	CC	CT	CC	CC	CC	CC	CC	CC	CC	CC
SSL2.50ch01_77423923	A	G	AA	AA	AA	AA	AA	AG	AA	AA	NN	AA	AA	GG	AA	GG	AA	AA	AA	AA	AA	AA	GG	AG	AA	AA	AA	AA	AA	AA	AA	AA	AA	AA	AA	AA	AA	AA	AA	AA	AG	AA	AA	NN	AA	AA	AA	AA	GG
SSL2.50ch01_77426206	A	G	AA	AA	AA	AA	GG	AA	AA	AA	AA	AA	AA	AA	AA	AA	AA	AA	AG	GG	AA	AA	AA	AA	AA	AA	AA	AA	AA	AA	AA	AA	AA	AA	AA	AA	AG	AG	GG	AA	AA	AA	AA	AA	AA	AA	AA	AA	AA
SSL2.50ch01_77442061	T	A	TT	TT	TT	TT	TT	TT	TT	AA	AA	TA	AA	TT	AA	TT	TA	TT	TT	TT	TT	TT	TT	TA	TT	TT	TT	TA	TT	TT	TT	TT	TT	TT	TT	TT	TT	TA	TT	TT	TA	TT	TT	TT	TT	TT	TT	TT	TT
SSL2.50ch01_77442082	G	A	GG	GG	GG	GG	GG	AA	GG	AA	AA	GA	AA	AA	AA	AA	GA	GG	GG	GG	GG	GG	AA	GA	GG	GG	GG	GA	GG	GG	GG	GG	GG	GG	GG	GG	GG	GA	GG	GG	GA	GG	GG	GG	GG	GG	GG	GG	GG
SSL2.50ch01_77442161	T	A	TT	TT	TT	AA	TT	TT	TT	TT	TT	TT	TT	TT	TT	TT	TT	TT	AT	TT	TT	TT	TT	TT	AA	TT	TT	AT	TT	TT	TT	TT	TT	AA	TT	TT	TT	TT	TT	TT	TT	TT	TT	TT	TT	TT	TT	TT	AA
SSL2.50ch01_77502465	T	G	NN	GT	GT	GT	GT	GT	TT	GT	NN	TT	GT	GT	GT	GG	TT	TT	TT	GT	GT	GT	NN	GT	GT	GT	GT	GT	GT	GT	GT	GT	GT	TT	NN	TT	GT	GG	GT	GT	GT	GT	GT	GT	GT	GT	GT	GT	GT
SSL2.50ch01_77502468	A	G	NN	AG	AG	AG	AG	AG	AA	AG	NN	AA	AG	AG	AG	GG	AA	AA	AA	AG	AG	AG	NN	AG	AG	AG	AG	AG	AG	AG	AG	AG	AG	AA	NN	AA	AG	GG	AG	AG	AG	AG	AG	AG	AG	NN	AG	AG	AG
SSL2.50ch01_77504067	G	A	GG	GG	GG	GG	NN	NN	GG	AA	NN	AA	NN	GG	AA	NN	GG	GG	GG	GG	GG	GG	NN	NN	GG	NN	GG	NN	GG	GG	GG	GG	GG	GG	NN	NN	GG	NN	GG	GG	GG	NN	GG	NN	GG	GG	GG	GG	GG
SSL2.50ch01_77504110	G	A	GG	GG	GG	GG	NN	NN	GG	AA	NN	AA	NN	AA	AA	NN	GG	GG	GG	GG	AA	GG	NN	NN	AA	NN	GG	NN	AA	GG	GG	GG	GG	GG	NN	NN	AA	NN	GG	AA	GA	NN	GG	NN	AA	GG	GG	GG	GG
SSL2.50ch01_77546924	C	A	CC	CC	CC	CC	CC	CC	CC	CC	NN	CC	CC	CC	CC	CC	CC	CC	CC	CC	CC	CC	CC	CC	CC	CC	CC	CC	CC	CC	CC	CC	CC	CC	CC	CC	CC	CC	CC	CC	CC	CC	CC	CC	CC	CC	CC	CC	CC
SSL2.50ch01_77586121	T	C	TT	TT	CC	TT	TT	TT	CC	TT	TT	TC	CC	TT	TT	TT	TT	TT	TT	TT	TT	TT	TT	TT	TT	TT	TT	TT	TT	TT	TT	TT	TT	TT	CC	TT	TT	TT	TT	TT	TC	TT	TT	TT	TT	TT	TT	TT	TT
SSL2.50ch01_77586125	C	T	CC	CC	CC	CC	CC	CC	CC	CC	TT	CC	CC	CC	TT	CC	CC	CC	CC	CC	CC	CC	CC	CC	CC	CC	CC	CC	CC	CC	CC	CC	CC	CC	CC	CC	CC	CC	CC	CC	CC	CC	CC	CC	CC	TT	CC	CC	CC
SSL2.50ch01_77586129	C	T	CC	CC	CC	CC	CC	CC	CC	CC	CC	CC	CC	CC	CC	CC	CC	CC	CC	CC	CC	CC	CC	CC	CC	CC	CC	CC	CC	CC	CC	CC	CC	CC	CC	CC	CC	CC	CC	CC	CC	CC	CC	CC	CC	CC	CC	CC	CC
SSL2.50ch01_77603891	G	A	GG	GG	AA	GG	GG	GG	GG	GG	GG	GG	GG	GG	GG	GG	GG	GG	GG	GG	GG	GG	GG	GG	GG	GG	AG	GG	GG	AG	GG	GG	GG	GG	GG	GG	GG	GG	GG	GG	GG	GG	GG	GG	GG	GG	AA	GG	GG
SSL2.50ch01_77697038	C	A	CC	CC	CC	CC	CC	CC	CC	CC	CC	CC	CC	CC	CC	CC	CC	CC	AC	AA	CC	CC	CC	CC	CC	CC	CC	AC	AA	CC	CC	CC	CC	CC	CC	CC	AC	CC	AA	AA	AA	CC	CC	CC	AA	CC	CC	CC	CC
SSL2.50ch01_77711024	C	A	CC	CC	CC	AA	CC	CC	CC	CC	CC	CC	CC	CC	CC	CC	CC	CC	CA	AA	AA	CC	CC	CC	CC	AA	CA	CC	CC	CC	CC	CC	CC	CC	CC	AA	CA	CC	CC	CC	CC	CC	CC	AA	CC	CC	CC	AA	CC
SSL2.50ch01_77731758	T	C	TT	NN	TT	TT	TT	TT	TT	TT	TT	TT	TT	TT	TT	TT	TT	TT	TT	TT	TT	TT	TT	TT	CC	TT	TT	TT	TT	TT	TT	TT	TT	TT	TT	TT	TT	TT	TT	TT	TT	TT	TT	TT	TT	TT	TT	TT	TT
SSL2.50ch01_77738585	C	G	CC	CC	CC	CC	GG	GG	CC	CC	CC	GG	GG	GG	CC	GG	CG	CC	CC	CC	CC	CC	GG	GG	GG	CC	CC	CC	CC	CG	CC	CC	CC	CC	CC	CC	CC	CC	CC	CC	CG	CC	CC	CC	GG	CC	CC	CC	CC
SSL2.50ch01_77774290	A	C	AA	AA	AA	AA	AA	CC	AA	CC	CC	CC	CC	CC	CC	CC	AC	AA	AA	AA	AA	AA	CC	CC	AA	AA	AA	AA	AA	AC	AA	AA	AA	AA	AA	AA	AA	AC	AA	AA	AA	AA	AA	AA	AA	AA	AA	AA	AA
SSL2.50ch01_77791651	G	T	GG	GG	GG	GG	GG	TG	GG	TT	TT	TT	TT	TT	TT	TT	TG	GG	GG	GG	GG	GG	TT	TG	GG	GG	GG	GG	GG	TG	GG	GG	GG	GG	GG	GG	GG	TG	GG	GG	GG	GG	GG	GG	GG	GG	GG	GG	GG
SSL2.50ch01_77807247	C	T	TT	NN	TT	CC	CC	CC	CC	CC	CC	CC	CC	CC	CC	CC	CC	CC	TC	TT	CC	NN	NN	TC	CC	CC	TC	CC	CC	CC	TT	CC	TT	TT	TT	CC	NN	CC	CC	CC	TT	CC	NN	NN	CC	TT	CC	TT	NN
SSL2.50ch01_77807358	C	G	GG	CC	GG	CC	CC	CC	CC	CC	CC	CC	CC	CC	CC	CC	CC	CC	CG	GG	CC	GG	CC	CC	CC	CC	GG	CC	CC	CC	GG	CC	GG	GG	GG	CC	CG	CC	CC	CC	CG	CC	CC	GG	CC	GG	CC	GG	GG
SSL2.50ch01_77816798	G	C	GG	GG	GG	GG	GG	GG	GG	GG	GG	GG	GG	GG	GG	GG	GG	CC	GC	GG	GG	GG	GG	GG	GG	GG	GG	GG	GG	GG	GG	GG	GG	GG	GG	CC	GG	GG	GG	GG	GG	GG	CC	GG	GG	GG	GG	GG	GG
SSL2.50ch01_78133382	A	T	AA	AA	AA	AA	AA	TA	AA	AA	AA	TA	AA	AA	AA	AA	AA	AA	AA	AA	AA	AA	AA	AA	TT	AA	AA	AA	AA	AA	AA	AA	AA	AA	AA	AA	AA	AA	AA	AA	AA	AA	AA	AA	AA	AA	AA	AA	AA
SSL2.50ch01_78158413	C	T	CC	CC	TT	CC	CC	CC	CC	CC	NN	CC	CC	CC	CC	CC	CC	CC	CC	CC	CC	CC	CC	CC	TT	CC	CC	CC	CC	CC	NN	CC	CC	CC	CC	CC	CC	CC	CC	CC	CC	CC	CC	TT	TT	TT	CC	CC	TT
SSL2.50ch01_78160657	G	A	GG	GG	AA	GG	GG	AA	GG	AA	AA	GG	AA	NN	AA	AA	GG	GG	GG	GG	GG	GG	NN	AG	AA	GG	GG	GG	GG	GG	GG	GG	GG	GG	GG	GG	GG	AA	GG	GG	GG	GG	GG	AA	AA	AA	GG	GG	AA
SSL2.50ch01_78165227	C	A	CC	CC	CC	CC	CC	CC	CC	AA	AA	CC	AA	CC	AA	CC	CC	CC	CC	CC	CC	CC	CC	NN	CC	CC	CC	CC	CC	CC	CC	CC	CC	CC	CC	CC	CC	CA	CC	CC	CC	CC	CC	CC	CC	CC	CC	CC	CC
SSL2.50ch01_78165262	T	A	TT	TT	AA	TT	TT	TA	TT	TT	TT	TT	TT	TT	TT	TT	TT	TT	TT	TT	TT	TT	TT	TT	AA	TT	TT	TT	TT	TT	TT	TT	TT	TT	TT	TT	TT	TT	TT	TT	TT	TT	TT	AA	AA	AA	TT	TT	AA
SSL2.50ch01_78168549	C	T	CC	CC	TT	CC	CC	CC	CC	CC	CC	CC	CC	CC	CC	CC	CC	CC	CC	CC	CC	CC	CC	CC	TT	CC	CC	TT	TT	CC	CC	CC	CC	CC	TT	CC	CC	NN	CC	TT	CC	CC	CC	TT	CC	TT	CC	TT	TT
SSL2.50ch01_78278435	C	A	CC	CC	CC	CC	CC	NN	CC	NN	NN	NN	CC	NN	NN	NN	CC	CC	CC	CC	CC	CC	NN	CC	CC	CC	CC	CC	AA	CA	CC	CC	CC	CC	CC	CC	CC	CA	NN	AA	CC	CC	CC	CC	CC	CC	AA	CC	CC
SSL2.50ch01_78278436	T	A	TT	TT	TT	TT	TT	NN	TT	NN	NN	NN	TT	NN	NN	NN	TT	TT	TT	TT	TT	TT	NN	TT	TT	TT	TT	TT	AA	TA	TT	TT	TT	TT	TT	TT	TT	TA	NN	AA	TT	TT	TT	TT	TT	TT	AA	TT	TT
SSL2.50ch01_78278438	T	C	TT	TT	TT	TT	TT	NN	TT	NN	NN	NN	TT	NN	NN	NN	TT	TT	TT	TT	TT	TT	NN	TT	TT	TT	TT	TT	CC	TC	TT	TT	TT	TT	TT	TT	TT	TC	NN	CC	TT	TT	TT	TT	TT	TT	CC	TT	TT
SSL2.50ch01_78278507	A	C	AA	AA	AA	AA	AA	CC	AA	CC	NN	NN	AA	NN	CC	NN	AA	AA	AA	AA	AA	AA	NN	NN	AA	AA	AA	AA	CC	AC	AA	AA	AA	AA	AA	AA	AA	AC	NN	CC	AA	AA	AA	AA	CC	AA	CC	AA	AA
SSL2.50ch01_78334496	C	T	CC	CC	CC	CC	CC	TC	CC	TT	TT	TT	CC	TT	TT	CC	TC	CC	CC	CC	CC	CC	TT	NN	CC	CC	CC	CC	CC	CC	CC	CC	CC	CC	CC	CC	CC	CC	CC	CC	CC	CC	CC	CC	CC	CC	CC	CC	CC
SSL2.50ch01_78337602	A	T	TT	TT	AA	TT	TT	TT	TT	TT	TT	TA	TT	TT	TT	AA	NN	AA	AA	AA	AA	AA	TT	AA	TT	NN	AA	AA	TT	TA	AA	AA	AA	TT	AA	AA	TT	TT	TT	TT	TT	TT	AA	TT	AA	AA	AA	AA	TT
SSL2.50ch01_78337603	T	G	GG	GG	TT	GG	GG	GG	GG	GG	GG	TG	GG	GG	GG	TT	NN	TT	TT	TT	TT	TT	GG	TT	GG	NN	TT	TT	GG	TG	TT	TT	TT	GG	TT	TT	GG	GG	GG	GG	GG	GG	TT	GG	TT	TT	TT	TT	GG
SSL2.50ch01_78337606	T	C	TT	TT	TT	TT	TT	TT	TT	TT	TT	TC	TT	TT	TT	TT	NN	TT	TT	TT	TT	TT	TT	TC	TT	NN	TT	TT	TT	TT	TT	TT	TT	TT	TT	TT	TT	TT	TT	TT	TT	TT	TT	TT	TT	TT	TT	TT	TT
SSL2.50ch01_78337611	A	G	AA	AA	AA	AA	AA	AA	AA	AA	AA	AA	AA	AA	AA	GG	AA	AA	GA	GG	AA	AA	AA	AA	AA	NN	AA	AA	AA	GA	AA	AA	AA	AA	GG	AA	AA	AA	AA	AA	AA	AA	AA	AA	AA	AA	GG	GG	AA
SSL2.50ch01_78337700	A	G	AA	AA	AA	AA	AA	AA	AA	AA	AA	AA	AA	AA	AA	GG	AA	GG	GG	GG	GG	AA	AA	AA	AA	GG	AG	GG	AA	AG	GG	GG	GG	AA	GG	AA	AA	AA	AA	AA	AA	AA	GG	AA	GG	GG	GG	GG	AA
SSL2.50ch01_78340787	T	C	TT	TT	TT	TT	CC	TC	TT	CC	CC	TC	TT	CC	CC	TT	TT	TT	TT	TT	TT	TT	CC	TT	TT	TT	TT	TT	TT	TT	TT	TT	TT	TT	TT	NN	TT	TT	TT	TT	TT	TT	TT	TT	TT	TT	TT	TT	TT
SSL2.50ch01_78340796	T	C	TT	TT	TT	TT	CC	TC	TT	CC	CC	CC	CC	CC	CC	TT	TC	TT	TT	TT	TT	TT	CC	CC	TT	TT	TT	TT	TT	TT	TT	TT	TT	TT	TT	NN	TT	TT	TT	TT	TT	TT	TT	TT	TT	TT	TT	TT	TT
SSL2.50ch01_78340835	T	C	CC	TT	CC	TT	TT	TT	TT	TT	TT	TT	TT	TT	TT	CC	TT	TT	TT	TT	TT	CC	TT	TT	CC	TT	CT	CT	TT	CC	TT	TT	TT	TT	CC	CC	TT	TT	CC	TT	TT	TT	TT	TT	TT	TT	CC	CC	TT
SSL2.50ch01_78340867	T	C	CC	TT	CC	TT	TT	TT	TT	TT	TT	TT	TT	TT	TT	CC	TT	TT	TT	TT	TT	CC	TT	TT	CC	TT	CT	CT	TT	CC	TT	TT	TT	TT	CC	CC	TT	TT	CC	TT	TT	TT	TT	TT	TT	TT	CC	CC	TT
SSL2.50ch01_78437713	C	T	CC	CC	CC	CC	CC	TT	CC	CC	NN	TT	CC	TT	TT	CC	TC	CC	CC	CC	TT	CC	TT	TT	CC	TT	CC	TT	TT	TT	CC	CC	CC	CC	CC	NN	CC	TT	TT	CC	CC	CC	CC	CC	CC	CC	CC	CC	CC
SSL2.50ch01_78439592	G	A	GG	GG	GG	AA	GG	AA	GG	GG	AA	AA	GG	AA	AA	AA	AA	AA	AG	GG	AA	AA	AA	AG	AA	AA	GG	AG	AA	AG	GG	GG	GG	AA	GG	GG	AG	AA	AA	GG	GG	GG	AA	GG	GG	GG	GG	GG	GG
SSL2.50ch01_78457378	A	G	GG	GG	GG	AA	AA	AA	GG	GG	AA	AA	AA	AA	AA	GG	AA	AA	GG	GG	AA	AA	AA	AA	GG	AA	GA	GA	GG	GA	AA	AA	AA	AA	GG	AA	AA	GG	AA	AA	AA	AA	AA	AA	GG	GG	AA	GG	GG
SSL2.50ch01_78461967	G	A	AA	GG	GG	AA	AA	AA	GG	GG	AA	AA	AA	AA	AA	GG	GA	GG	GA	AA	AA	GG	AA	GA	GG	AA	GG	GA	GG	GG	GG	GG	GG	GG	GG	AA	AA	GA	AA	AA	AA	AA	GG	AA	GG	GG	GG	GG	GG
SSL2.50ch01_78462060	A	G	AA	GG	NN	AA	AA	AA	GG	GG	AA	AA	AA	AA	AA	GG	AG	GG	AG	AA	AA	GG	AA	AA	NN	AA	NN	AA	GG	NN	NN	GG	GG	GG	NN	AA	AA	AA	AA	AA	AA	AA	GG	AA	GG	NN	GG	GG	GG
SSL2.50ch01_78462070	A	G	AA	GG	NN	AA	AA	AA	GG	GG	AA	AA	AA	AA	AA	GG	AG	GG	AG	AA	AA	GG	AA	AA	NN	AA	NN	AA	GG	NN	NN	GG	GG	GG	NN	AA	AA	AA	AA	AA	AA	AA	GG	AA	GG	NN	GG	GG	GG
SSL2.50ch01_78462071	C	T	CC	TT	NN	CC	CC	CC	TT	TT	CC	CC	CC	CC	CC	TT	CT	TT	CT	CC	CC	TT	CC	CC	NN	CC	NN	CC	TT	NN	NN	TT	TT	TT	NN	CC	CC	CC	CC	CC	CC	CC	TT	CC	TT	NN	TT	TT	TT
SSL2.50ch01_78462098	G	C	GG	CC	NN	GG	GG	GG	CC	CC	GG	GG	GG	GG	GG	CC	CG	CC	CG	GG	GG	CC	GG	GG	NN	GG	NN	GG	CC	NN	NN	CC	CC	CC	NN	GG	GG	GG	GG	GG	GG	GG	CC	GG	CC	NN	CC	CC	CC
SSL2.50ch01_78472355	A	G	AA	AA	AA	AA	AA	AA	AA	AA	AA	AA	AA	AA	AA	AA	AG	GG	AG	AA	AA	GG	AA	AA	AA	AA	AG	AA	AA	AA	AA	GG	AA	AA	AA	AA	AA	AA	AA	AA	AA	AA	GG	AA	AA	AA	AA	AA	AA
SSL2.50ch01_78472363	T	C	CC	TT	TT	CC	CC	CT	TT	TT	CC	CC	TT	CC	CC	TT	CT	TT	CT	CC	CC	TT	CC	CT	TT	CC	TT	CT	TT	TT	TT	TT	TT	TT	TT	CC	CC	CT	CC	CC	CC	CC	TT	CC	TT	TT	TT	TT	TT
SSL2.50ch01_78486572	G	A	GG	GG	GG	GG	GG	AA	GG	GG	AA	AA	AA	AA	AA	AA	AA	GG	GA	GG	GG	AA	AA	AA	GG	GG	AA	GG	GG	GA	GG	GG	GG	AA	AA	AA	GG	GG	GG	GG	GG	GG	AA	GG	GG	GG	GG	AA	AA
SSL2.50ch01_78487223	A	G	AA	AA	AA	AA	AA	AG	AA	AA	GG	AG	GG	GG	GG	GG	AG	AA	AG	AA	AA	GG	GG	AA	AA	AA	AG	AA	AA	AG	AA	AA	AA	GG	GG	AA	AA	AA	AA	AA	AA	AA	GG	AA	AA	AA	AA	GG	GG
SSL2.50ch01_78487226	G	T	GG	GG	GG	GG	GG	TT	GG	GG	TT	TT	TT	TT	TT	TT	TT	GG	GT	GG	GG	TT	TT	TT	GG	GG	GT	GG	GG	GT	GG	GG	GG	TT	TT	GG	GG	GG	GG	GG	GG	GG	TT	GG	GG	GG	GG	TT	TT
SSL2.50ch01_78499791	G	A	AA	GG	AA	GG	GG	GG	AA	AA	GG	GG	GG	GG	GG	AA	GG	GG	GA	AA	GG	AA	GG	GG	GG	GG	GA	GA	GG	GA	AA	GG	AA	AA	AA	GG	GG	GG	AA	GG	GG	GG	AA	GG	AA	AA	GG	AA	AA
SSL2.50ch01_78499809	A	G	AA	GG	AA	GG	GG	GG	AA	AA	GG	GG	GG	NN	GG	AA	GG	NN	AA	AA	AA	AA	GG	AG	GG	NN	AA	AG	AA	AA	AA	AA	AA	NN	AA	NN	AG	AA	AA	AA	GG	AA	AA	AA	AA	AA	AA	AA	AA
SSL2.50ch01_78504898	A	C	AA	AA	AA	NN	AA	CA	AA	AA	AA	CA	AA	AA	AA	AA	CA	AA	AA	AA	AA	AA	AA	AA	AA	AA	AA	AA	AA	AA	AA	AA	AA	AA	NN	CC	CA	AA	AA	AA	AA	AA	AA	AA	AA	AA	AA	AA	AA
SSL2.50ch01_78505014	G	T	GG	GG	GG	GG	GG	GT	GG	GG	GG	GT	GG	GG	GG	GG	GT	GG	GG	GG	GG	GG	GG	GG	GG	GG	GG	GG	GG	GG	GG	GG	GG	GG	GG	TT	GT	GG	GG	GG	GG	GG	GG	GG	GG	GG	GG	GG	GG
SSL2.50ch01_78511531	C	A	CC	NN	CC	CC	AA	AA	CC	CC	NN	CA	CC	CC	AA	CC	AA	CC	CC	CC	CC	CC	CC	NN	AA	CC	CC	CC	NN	CC	CC	CC	CC	CC	CC	AA	CA	CC	AA	CC	CC	CC	CC	CC	CC	CC	CC	CC	CC
SSL2.50ch01_78511532	A	C	AA	NN	AA	AA	AA	AA	AA	AA	NN	CA	AA	CC	AA	AA	CA	AA	AA	AA	AA	AA	CC	NN	AA	AA	AA	AA	NN	AA	AA	AA	AA	AA	AA	AA	AA	AA	AA	AA	AA	AA	AA	AA	AA	AA	AA	AA	AA
SSL2.50ch01_78511652	T	C	TT	TT	TT	TT	CC	TT	TT	TT	TT	TT	TT	TT	TT	TT	TT	TT	TT	TT	TT	TT	TT	TT	CC	TT	TT	TT	NN	TT	TT	TT	TT	TT	TT	TT	TT	TT	CC	TT	TT	TT	TT	TT	TT	TT	TT	TT	TT
SSL2.50ch01_78511668	T	C	TT	TT	TT	TT	CC	CT	TT	TT	CC	CT	TT	TT	CC	TT	CC	TT	TT	TT	TT	TT	TT	CC	CC	TT	TT	TT	NN	TT	TT	TT	TT	TT	TT	CC	TT	NN	CC	TT	TT	TT	TT	TT	TT	TT	TT	TT	TT
SSL2.50ch01_78511683	T	C	TT	TT	TT	TT	TT	TT	TT	TT	TT	TT	TT	TT	TT	TT	TT	TT	TT	TT	TT	CC	TT	TT	TT	TT	TT	TT	NN	TT	TT	TT	TT	TT	TT	TT	TT	TT	TT	TT	TT	TT	CC	TT	TT	TT	TT	TT	TT
SSL2.50ch01_78514594	G	A	GG	AA	GG	GG	GG	AA	GG	GG	AA	AA	AA	AA	AA	GG	AA	GG	GG	GG	GG	GG	AA	AG	GG	GG	GG	GG	GG	GG	GG	GG	GG	GG	GG	GG	AG	GG	GG	AA	GG	GG	GG	AA	GG	GG	GG	GG	GG
SSL2.50ch01_78514667	T	A	TT	TT	TT	TT	TT	AA	TT	TT	AA	AA	TT	TT	AA	TT	AA	TT	TT	TT	TT	TT	TT	AT	TT	TT	TT	TT	TT	TT	TT	TT	TT	TT	TT	TT	AT	TT	TT	AA	TT	TT	TT	AA	TT	TT	TT	TT	TT
SSL2.50ch01_78530550	T	C	TT	TT	TT	TT	CC	CC	TT	TT	CC	CC	CC	CC	CC	TT	TC	TT	TT	TT	TT	TT	CC	TC	TT	TT	TT	TT	TT	TT	TT	TT	TT	TT	TT	TT	TT	TT	TT	TT	TT	TT	TT	TT	TT	TT	TT	TT	TT
SSL2.50ch01_78541029	T	C	TT	TT	TT	TT	TT	TT	TT	TT	TT	TT	TT	CC	TT	TT	TT	TT	TT	TT	TT	TT	CC	TT	TT	TT	TT	TT	TT	TT	TT	TT	TT	TT	TT	TT	TT	TT	TT	TT	TT	TT	TT	TT	TT	TT	TT	TT	TT
SSL2.50ch01_78543245	G	C	GG	GG	GG	GG	CC	NN	GG	GG	CC	CC	CC	CC	CC	GG	GC	GG	GG	GG	GG	GG	CC	NN	GG	GG	GG	GG	NN	GG	GG	GG	GG	GG	GG	GG	GG	GG	GG	GG	GG	GG	GG	GG	GG	GG	GG	GG	GG
SSL2.50ch01_78550637	C	T	CC	TT	CC	CC	CC	TT	TT	CT	TT	TT	TT	CC	TT	TT	TT	CC	CC	CC	CC	CC	CC	TT	CC	CC	CC	CT	NN	TT	CC	CC	CC	CC	TT	CC	CC	NN	CC	CC	CC	TT	CC	CC	CC	TT	TT	CC	TT
SSL2.50ch01_78558822	T	C	TT	TT	CC	TT	CC	TT	TT	CC	TT	TT	TT	TT	TT	TT	TT	TT	TT	TT	TT	TT	TT	TT	TT	TT	CT	CT	TT	TT	TT	TT	TT	TT	TT	CC	TT	CT	CC	CC	CC	TT	TT	CC	CC	TT	TT	TT	TT
SSL2.50ch01_78558865	C	A	CC	CC	CC	CC	CC	AC	CC	CC	AA	AC	CC	CC	AA	CC	AC	CC	CC	CC	CC	CC	CC	CC	CC	CC	CC	CC	CC	CC	CC	CC	CC	CC	CC	CC	CC	CC	CC	CC	CC	CC	CC	CC	CC	CC	CC	CC	CC
SSL2.50ch01_78577244	G	A	AA	AA	GG	AA	GG	AG	AA	NN	GG	GG	AA	GG	GG	AA	AG	NN	NN	NN	GG	NN	GG	NN	AA	GG	AG	AG	GG	AA	AA	GG	NN	AA	AA	GG	NN	GG	GG	GG	NN	AA	GG	GG	GG	AA	AA	NN	NN
SSL2.50ch01_78577663	G	T	GG	GG	NN	NN	TT	GG	GG	TT	NN	GG	GG	GG	GG	NN	GG	GG	GG	GG	GG	GG	GG	NN	GG	NN	NN	GT	NN	GG	GG	GG	GG	GG	GG	TT	GG	GT	TT	TT	TT	GG	GG	TT	TT	GG	GG	GG	GG
SSL2.50ch01_78582522	T	C	CC	TT	TT	TT	TT	CC	TT	TT	CC	TT	TT	TT	CC	TT	TT	TT	TC	CC	TT	CC	TT	TC	CC	TT	TC	TC	TT	TC	TT	TT	TT	CC	TT	TT	TT	TT	TT	TT	TT	TT	TT	TT	TT	TT	TT	TT	TT
SSL2.50ch01_78582541	A	T	AA	AA	AA	AA	AA	TA	AA	AA	AA	AA	AA	AA	AA	AA	AA	AA	AA	AA	AA	TT	AA	AA	AA	AA	TA	AA	AA	TA	AA	AA	AA	TT	AA	AA	AA	AA	AA	AA	AA	AA	AA	AA	AA	AA	AA	AA	AA
SSL2.50ch01_78582544	T	A	AA	TT	TT	TT	TT	AA	TT	TT	AA	TT	TT	TT	AA	TT	TT	TT	TA	AA	TT	AA	TT	TA	AA	TT	TA	TA	TT	TA	TT	TT	TT	AA	TT	TT	TT	TT	TT	TT	TT	TT	TT	TT	TT	TT	TT	TT	TT
SSL2.50ch01_78587856	G	A	AA	GG	GG	GG	GG	GG	GG	GG	GG	GG	GG	GG	GG	GG	GG	GG	GA	AA	GG	GG	GG	GG	AA	GG	GG	GA	GG	GG	GG	GG	GG	GG	GG	GG	GG	GG	GG	GG	GG	GG	GG	GG	GG	GG	GG	GG	GG
SSL2.50ch01_78587989	A	G	GG	NN	AA	GG	AA	NN	GG	AA	NN	AA	AA	AA	GG	AA	GG	AA	NN	GG	GG	NN	AA	GG	GG	GG	AA	NN	AA	AG	GG	AA	GG	AA	GG	AA	AA	AG	AA	NN	AA	GG	NN	AA	NN	AA	NN	AA	GG
SSL2.50ch01_78588118	C	T	CC	CC	CC	CC	CC	CT	CC	CC	CC	CC	CC	CC	CC	CC	CC	CC	CC	CC	CC	TT	CC	CC	CC	CC	CT	CC	CC	CT	CC	CC	CC	TT	NN	CC	CC	CC	CC	CC	CC	CC	CC	CC	CC	CC	CC	CC	CC
SSL2.50ch01_78618226	A	T	AA	AA	AA	AA	TT	TT	AA	AA	TT	TT	TT	TT	TT	AA	TA	AA	TA	TT	AA	AA	TT	TT	AA	AA	TA	AA	AA	TT	AA	AA	AA	AA	TT	TT	TT	TA	TT	AA	AA	AA	AA	TT	AA	AA	TT	AA	TT
SSL2.50ch01_78618242	A	C	AA	AA	AA	AA	CC	AA	AA	AA	AA	AA	AA	AA	AA	AA	AA	AA	CA	CC	AA	AA	AA	AA	AA	AA	AA	AA	AA	AA	AA	AA	AA	AA	AA	CC	AA	AA	AA	AA	AA	AA	AA	AA	AA	AA	AA	AA	AA
SSL2.50ch01_78644750	G	C	GG	GG	GG	GG	GG	GC	GG	GG	CC	GC	GG	CC	CC	GG	GC	GG	GG	GG	GG	GG	CC	CC	GG	GG	GG	GG	GG	GC	GG	GG	GG	GG	GG	GG	GG	GG	GG	GG	GG	GG	GG	GG	CC	GG	GG	GG	GG
SSL2.50ch01_78644885	A	C	AA	AA	AA	AA	CC	AA	AA	AA	AA	AA	CC	AA	AA	AA	AA	AA	NN	CC	CC	AA	AA	AA	CC	CC	AA	AA	AA	AA	AA	AA	AA	AA	AA	AA	AA	AA	AA	AA	AA	AA	AA	AA	AA	AA	AA	AA	AA
SSL2.50ch01_78644903	G	A	GG	GG	GG	GG	AA	GG	GG	GG	GG	GG	AA	GG	GG	GG	GG	GG	NN	AA	AA	GG	GG	GG	AA	AA	GG	GG	GG	GG	GG	GG	GG	GG	GG	GG	GG	GG	GG	GG	GG	GG	GG	GG	GG	GG	GG	GG	GG
SSL2.50ch01_78662602	A	C	AA	CC	AA	CC	CC	AA	AA	CC	CC	CC	AA	CC	CC	CC	CA	AA	CA	AA	AA	CC	CC	AA	CC	AA	CA	AA	CC	AA	AA	AA	AA	AA	AA	AA	AA	CA	AA	AA	AA	CC	AA	AA	CC	AA	AA	AA	AA
SSL2.50ch01_78662633	T	C	TT	CC	TT	CC	CC	TT	TT	CC	TT	CC	TT	CC	CC	CC	CT	TT	CT	TT	TT	CC	CC	TT	CC	TT	CT	TT	CC	TT	TT	TT	TT	TT	TT	TT	TT	CT	TT	TT	TT	CC	TT	TT	CC	TT	TT	TT	TT
SSL2.50ch01_78662648	A	T	AA	TT	AA	TT	TT	NN	AA	TT	TT	TT	AA	TT	TT	TT	AT	AA	AT	AA	AA	TT	TT	AA	TT	AA	AT	AA	TT	AA	AA	AA	AA	AA	AA	AA	AA	AT	AA	AA	AA	TT	AA	AA	TT	AA	AA	AA	AA
SSL2.50ch01_78662701	C	T	CC	TT	CC	TT	TT	CC	CC	TT	CC	TT	CC	TT	TT	TT	CT	CC	CT	CC	CC	TT	TT	CC	TT	CC	CT	CC	TT	CC	CC	CC	CC	CC	CC	CC	CC	CT	CC	CC	CC	TT	CC	CC	TT	CC	CC	CC	CC
SSL2.50ch01_78682730	T	G	GG	GG	TT	GG	TT	GG	TT	GG	NN	GG	GG	GG	NN	TT	GT	TT	GT	GG	TT	TT	GG	GT	GG	TT	GT	TT	GG	TT	TT	TT	TT	TT	TT	TT	GG	GT	TT	GG	GG	GG	TT	GG	GG	TT	TT	TT	TT
SSL2.50ch01_78695814	G	T	TT	TT	GG	GG	GG	GG	TT	TT	TT	GT	GG	GG	TT	GG	GG	GG	GT	GG	GG	TT	GG	GG	GG	GG	GG	GG	GG	GG	GG	GG	GG	GG	GG	GG	GG	GG	GG	GG	GG	GG	GG	GG	GG	GG	GG	GG	GG
SSL2.50ch01_78701503	T	A	AA	AA	TT	TT	AA	TT	AA	AA	AA	AT	TT	TT	AA	AA	TT	AA	AT	TT	TT	AA	TT	NN	AA	TT	AT	TT	AA	TT	TT	AA	TT	TT	TT	TT	AT	TT	TT	TT	TT	TT	AA	TT	TT	TT	TT	TT	TT
SSL2.50ch01_78705157	T	G	TT	GG	TT	TT	TT	TG	GG	TT	GG	TG	TT	TT	GG	GG	GG	GG	TG	TT	TT	GG	GG	TT	GG	TT	TG	TT	TT	TT	GG	GG	GG	GG	TT	TT	TT	TT	GG	TT	TT	TT	GG	TT	GG	TT	TT	TT	TT
SSL2.50ch01_78706740	A	G	AA	GG	AA	AA	AA	GG	AA	AA	NN	GA	AA	GG	GG	NN	GG	AA	GA	AA	AA	GG	GG	NN	GG	NN	AA	NN	AA	GA	GG	GG	GG	GG	AA	NN	AA	AA	GG	AA	AA	AA	AA	AA	GG	GG	GG	GG	AA
SSL2.50ch01_78706854	C	A	AA	CC	AA	AA	AA	CC	AA	AA	CC	AC	AA	CC	CC	CC	CC	CC	AC	AA	AA	CC	CC	CC	CC	AA	CC	AA	AA	AC	CC	CC	CC	CC	AA	AA	AA	AA	CC	AA	AA	AA	CC	AA	CC	CC	CC	CC	AA
SSL2.50ch01_78712102	C	T	TT	CC	CC	TT	TT	NN	CC	CC	TT	CT	TT	NN	TT	CC	TT	CC	CC	NN	TT	CC	TT	CC	TT	TT	CC	CT	NN	CT	CC	CC	CC	TT	TT	CC	CT	CT	CC	CC	CC	CC	CC	CC	CC	CC	CC	CC	CC
SSL2.50ch01_78712144	C	T	TT	CC	CC	TT	CC	NN	CC	CC	CC	CC	TT	NN	CC	CC	CC	CC	CC	NN	TT	CC	CC	CC	CC	TT	CC	CC	NN	CT	CC	CC	CC	CC	TT	CC	CT	CT	CC	CC	CC	CC	CC	CC	CC	CC	CC	CC	CC
SSL2.50ch01_78712153	T	G	GG	TT	TT	GG	GG	NN	TT	TT	GG	GT	GG	NN	GG	TT	GG	TT	GT	NN	GG	TT	GG	TT	GG	GG	TT	GG	NN	GT	TT	TT	TT	GG	GG	TT	GG	GT	GG	GG	TT	TT	TT	GG	TT	TT	TT	TT	TT
SSL2.50ch01_78712154	T	C	CC	TT	TT	CC	CC	NN	TT	TT	CC	CT	CC	NN	CC	TT	CC	TT	CT	NN	CC	TT	CC	TT	CC	CC	TT	CC	NN	CT	TT	TT	TT	CC	CC	TT	CC	CT	CC	CC	TT	TT	TT	CC	TT	TT	TT	TT	TT
SSL2.50ch01_78744976	C	T	CC	CC	CC	CC	CC	CC	CC	CC	CC	CC	CC	CC	CC	CC	CC	TT	CT	CC	CC	TT	CC	CC	CC	CC	CC	CC	CC	CC	CC	CC	CC	TT	CC	CC	CC	CC	CC	CC	CC	CC	CC	CC	CC	CC	CC	CC	CC
SSL2.50ch01_78751192	G	T	GG	GG	GG	GG	TT	TT	TT	TT	TT	TT	TT	TT	TT	TT	TT	GG	GG	GG	GG	GG	TT	TT	GG	GG	GG	GG	TT	GT	TT	GG	TT	GG	TT	GG	GT	GG	TT	GG	GG	GG	GG	TT	TT	GG	TT	TT	TT
SSL2.50ch01_78751229	G	T	TT	TT	TT	TT	GG	GG	GG	GG	GG	GG	GG	GG	GG	GG	GG	TT	TT	TT	TT	TT	GG	GG	TT	TT	TT	TT	GG	GT	GG	TT	GG	TT	GG	TT	GT	TT	GG	TT	TT	TT	TT	GG	GG	TT	GG	GG	GG
SSL2.50ch01_78753366	A	T	AA	AA	AA	AA	AA	AT	TT	TT	TT	AT	AA	TT	TT	TT	AT	AA	AA	AA	AA	AA	AA	TT	AA	AA	AA	AA	AA	AT	TT	AA	TT	AA	AA	AA	AA	AA	AA	AA	AA	AA	AA	TT	TT	AA	TT	AA	AA
SSL2.50ch01_78758662	A	G	AA	AA	AA	AA	AA	AA	AA	AA	AA	AA	GG	AA	AA	AA	AA	AA	AA	AA	AA	AA	AA	AA	AA	AA	AA	AA	AA	GG	AA	AA	AA	AA	AA	AA	AA	AA	AA	AA	AA	AA	AA	GG	GG	AA	GG	AA	AA
SSL2.50ch01_78758764	G	A	GG	GG	AA	GG	GG	AG	GG	AA	AA	GG	GG	AA	AA	AA	AG	GG	GG	GG	GG	GG	GG	AA	GG	GG	GG	GG	AA	GG	AA	AA	AA	GG	AA	GG	AG	GG	GG	GG	GG	GG	AA	GG	GG	GG	GG	AA	AA
SSL2.50ch01_78779707	G	A	GG	GG	GG	AA	AA	GG	GG	GG	AA	GA	AA	GG	AA	GG	GA	GG	GG	GG	GG	GG	AA	GG	GG	GG	GG	NN	GG	GG	GG	GG	GG	GG	GG	GG	GG	GG	GG	GG	GG	GG	GG	NN	AA	GG	GG	GG	GG
SSL2.50ch01_78780711	G	T	GG	GG	GG	NN	GG	NN	TT	TT	NN	GG	GG	NN	GG	GG	GG	NN	NN	GG	GG	NN	GG	GG	GG	GG	NN	GG	GG	GG	TT	GG	TT	GG	GG	GG	GG	GG	GG	NN	GG	GG	GG	GG	GG	GG	GG	GG	GG
SSL2.50ch01_78780750	C	G	CC	CC	CC	NN	GG	NN	CC	CC	NN	GC	GG	NN	GG	CC	GC	NN	NN	CC	CC	NN	GG	CC	CC	CC	NN	GC	CC	CC	CC	CC	CC	CC	CC	CC	CC	CC	CC	NN	CC	CC	CC	CC	GG	CC	CC	CC	CC
SSL2.50ch01_78780800	G	T	GG	GG	GG	TT	TT	GG	GG	GG	TT	GT	TT	GG	TT	GG	GT	GG	GG	GG	GG	GG	TT	GG	GG	GG	GG	GT	GG	GG	GG	GG	GG	GG	GG	GG	GG	GG	GG	GG	GG	GG	GG	GG	TT	GG	GG	GG	GG
SSL2.50ch01_78784374	A	T	TT	AA	AA	TT	TT	AA	AA	AA	AA	AA	AA	AA	AA	AA	AA	AA	AA	AA	AA	AA	AA	AA	AA	AA	AA	AA	AA	TT	AA	AA	AA	AA	AA	AA	TT	TA	AA	TT	TT	TT	AA	AA	AA	AA	TT	AA	AA
SSL2.50ch01_78800421	T	A	TT	TT	TT	NN	TT	TA	TT	TT	TT	TT	TT	AA	TT	TT	TT	TT	TT	TT	TT	TT	AA	AA	TT	TT	TT	TT	TT	NN	TT	TT	TT	TT	TT	NN	TT	NN	TT	NN	TT	TT	TT	TT	TT	TT	TT	TT	AA
SSL2.50ch01_78805045	G	A	GG	AA	AA	GG	GG	GG	AA	AA	AA	GA	GG	GG	AA	AA	GG	AA	GA	GG	AA	AA	GG	GG	GG	AA	GG	AA	AA	GA	AA	AA	AA	AA	AA	GG	GG	GG	GG	AA	AA	GG	AA	GG	GG	AA	AA	AA	GG
SSL2.50ch01_78823365	C	G	CC	GG	GG	CC	CC	GG	CC	GG	GG	CG	CC	GG	GG	GG	CG	GG	GG	GG	CC	CC	GG	GG	CC	CC	GG	NN	CC	CC	CC	GG	CC	CC	GG	CC	CC	GG	CC	CC	GG	CC	CC	GG	CC	CC	GG	GG	CC
SSL2.50ch01_78823386	T	C	TT	TT	TT	TT	CC	TT	TT	TT	TT	TT	TT	TT	TT	TT	TT	TT	TT	TT	TT	TT	TT	TT	CC	TT	TT	NN	CC	TT	TT	TT	TT	TT	TT	TT	TT	TT	TT	TT	TT	TT	TT	TT	TT	CC	TT	TT	TT
SSL2.50ch01_78901613	T	G	GG	NN	GG	TT	GG	GT	TT	TT	GG	GG	GG	GG	GG	TT	GG	TT	TT	TT	TT	GG	GG	GG	TT	TT	GT	TT	TT	GG	TT	TT	TT	GG	TT	GT	GT	GT	TT	GG	TT	TT	TT	GG	TT	TT	GG	TT	TT
SSL2.50ch01_78922644	G	C	GG	GG	GG	GG	GG	GG	GG	GG	GG	GG	GG	GG	GG	GG	GG	GG	GC	CC	GG	NN	GG	GG	GG	GG	GG	GG	CC	GG	GG	GG	GG	CC	GG	GG	GG	GG	CC	GG	GG	GG	GG	GG	GG	GG	GG	GG	GG
SSL2.50ch01_78922715	A	G	AA	AA	AA	AA	GG	GA	AA	AA	GG	GA	AA	GG	GG	AA	GA	AA	GA	GG	AA	NN	GG	AA	AA	AA	AA	AA	GG	AA	AA	AA	AA	GG	AA	AA	AA	AA	GG	AA	AA	AA	AA	AA	AA	AA	AA	AA	AA
SSL2.50ch01_78923737	T	A	TT	TT	AA	AA	AA	TT	TT	TT	TT	TT	AA	TT	TT	AA	TT	AA	AT	AA	AA	AA	TT	TT	TT	AA	TT	TT	TT	AT	TT	TT	TT	AA	TT	AA	AT	TT	AA	TT	AA	TT	TT	TT	TT	TT	TT	TT	TT
SSL2.50ch01_78944312	C	T	CC	CC	TT	TT	CC	NN	CC	CC	CC	CC	CC	CC	CC	TT	CC	CC	CC	CC	CC	CC	CC	CC	CC	CC	CT	CC	CC	CC	CC	CC	CC	CC	CC	TT	CT	CC	CC	CC	TT	CC	CC	CC	CC	CC	CC	CC	CC
SSL2.50ch01_78947221	T	C	TT	TT	TT	TT	CC	TT	TT	TT	TT	TT	TT	TT	TT	TT	TT	TT	TT	TT	CC	TT	TT	TT	TT	CC	TT	TT	TT	TT	TT	TT	TT	TT	TT	TT	TT	CC	TT	TT	CC	TT	TT	TT	TT	TT	NN	TT	NN
SSL2.50ch01_78947236	T	C	TT	TT	TT	TT	TT	CT	TT	TT	CC	CT	TT	CC	CC	TT	CT	TT	TT	TT	TT	TT	CC	CT	TT	TT	TT	TT	TT	TT	TT	TT	TT	TT	TT	TT	TT	TT	TT	TT	TT	TT	TT	TT	TT	TT	NN	TT	NN
SSL2.50ch01_78965734	C	A	CC	CC	CC	CC	CC	CC	CC	CC	CC	CA	CC	CC	CC	CC	CC	CC	CC	CC	CC	CC	AA	CC	CC	CC	CA	CC	AA	CC	CC	CC	CC	CC	CC	CC	CC	CC	CC	CC	AA	CC	CC	CC	CC	CC	CC	CC	CC
SSL2.50ch01_78965805	T	A	AA	TT	TT	TT	AA	AT	TT	TT	TT	AT	TT	TT	TT	TT	TT	TT	TT	TT	TT	TT	AA	TT	TT	TT	AT	TT	AA	TT	TT	TT	TT	TT	AA	AA	TT	TT	TT	AA	AA	AA	TT	AA	TT	TT	TT	TT	TT
SSL2.50ch01_78970921	C	T	CC	CC	CC	CC	CC	TT	CC	CC	TT	CC	CC	TT	CC	TT	TC	CC	CC	CC	CC	CC	CC	TC	CC	CC	CC	CC	CC	CC	CC	CC	CC	CC	CC	CC	CC	CC	CC	CC	CC	CC	CC	CC	CC	CC	CC	CC	CC
SSL2.50ch01_78975169	A	G	GG	AA	AA	AA	GG	GA	AA	AA	AA	GA	AA	AA	AA	AA	AA	AA	AA	AA	AA	AA	GG	AA	AA	AA	GG	AA	GG	AA	AA	AA	AA	AA	GG	GG	AA	GA	AA	GG	GG	GG	AA	GG	AA	AA	AA	AA	AA
SSL2.50ch01_78975298	T	A	AA	TT	TT	TT	AA	AT	TT	TT	TT	AT	TT	TT	TT	TT	TT	TT	TT	TT	TT	TT	AA	TT	TT	TT	AT	TT	AA	TT	TT	TT	TT	TT	AA	AA	TT	AT	TT	AA	AA	AA	TT	AA	TT	TT	TT	TT	TT
SSL2.50ch01_78981378	A	T	TT	AA	AA	AA	AA	TT	AA	AA	TT	TA	AA	TT	AA	TT	TA	AA	TA	AA	AA	AA	TT	TA	AA	AA	AA	AA	TT	AA	AA	AA	AA	AA	TT	TA	AA	TA	AA	TT	TT	TT	AA	TT	AA	TT	AA	AA	AA
SSL2.50ch01_78981392	A	G	GG	AA	AA	AA	AA	GG	AA	AA	GG	AG	AA	GG	AA	GG	NN	AA	GG	AA	AA	NN	GG	GG	AA	AA	AG	AA	GG	AA	AA	AA	AA	AA	GG	AG	AA	AG	AA	GG	GG	GG	AA	GG	AA	GG	AA	AA	AA
SSL2.50ch01_78981444	C	T	TT	CC	CC	CC	CC	TT	CC	CC	TT	CT	CC	TT	CC	TT	NN	CC	TT	CC	CC	NN	TT	TT	CC	CC	CT	CC	TT	CT	CC	CC	CC	CC	TT	CT	CC	CT	CC	TT	TT	TT	CC	TT	CC	TT	CC	CC	CC
SSL2.50ch01_78988640	T	C	TT	TT	TT	TT	CC	TT	TT	TT	CC	CC	TT	TT	CC	TT	TC	TT	TC	CC	TT	TT	CC	TT	CC	TT	TT	TT	TT	TT	TT	TT	TT	TT	TT	CC	TC	TT	CC	CC	TT	TT	TT	TT	TT	CC	TT	TT	TT
SSL2.50ch01_78991023	A	T	AA	AA	AA	AA	AA	AA	AA	AA	AA	AA	AA	AA	AA	AA	AA	AA	AA	AA	AA	AA	AA	AA	AA	AA	AA	AA	AA	TT	AA	AA	AA	AA	AA	AA	TA	AA	AA	AA	TT	AA	AA	TT	AA	AA	AA	AA	AA
SSL2.50ch01_78991065	A	T	AA	AA	AA	AA	AA	AA	AA	AA	AA	AA	AA	AA	AA	AA	AA	AA	AA	AA	AA	AA	AA	AA	AA	AA	AA	AA	AA	AA	AA	AA	AA	AA	AA	AA	AA	AA	AA	AA	AA	AA	AA	AA	AA	TT	AA	AA	AA
SSL2.50ch01_78991070	C	G	CC	CC	CC	CC	CC	CC	CC	CC	CC	CC	CC	CC	CC	CC	CC	CC	CG	GG	CC	CC	CC	CC	GG	CC	CC	CC	CC	CC	CC	CC	CC	CC	CC	GG	CG	CC	CC	GG	CC	CC	CC	CC	CC	CC	CC	CC	CC
SSL2.50ch01_79003198	A	G	AA	AA	AA	AA	AA	AA	AA	AA	AA	AA	AA	AA	AA	AA	AA	AA	AA	AA	AA	AA	AA	AA	AA	AA	AA	AA	AA	AA	AA	AA	AA	AA	AA	AA	AA	AA	AA	AA	GG	AA	AA	AA	AA	AA	AA	AA	AA
SSL2.50ch01_79090278	C	G	CC	GG	CC	CC	CC	CC	CC	CC	CC	CC	CC	CC	CC	CC	CG	GG	CC	CC	CC	NN	CC	CG	CC	CC	CG	CC	CC	CC	GG	GG	GG	GG	CC	CC	CC	CC	CC	CC	CC	CC	GG	CC	CC	CC	CC	CC	CC
SSL2.50ch01_79162699	G	C	GG	GG	GG	GG	NN	GG	CC	CC	NN	NN	NN	NN	NN	NN	GG	GG	GC	CC	CC	GG	NN	NN	GG	CC	GC	GC	GG	GG	GG	GG	GG	GG	GG	GG	GC	GG	CC	GG	GG	GG	GG	CC	GG	GG	GG	GG	GG
SSL2.50ch01_79162794	G	A	GG	NN	AG	NN	GG	AG	GG	GG	GG	AG	AA	GG	GG	GG	GG	GG	NN	GG	GG	NN	GG	AA	GG	NN	GG	GG	NN	GG	GG	GG	GG	GG	GG	NN	GG	NN	GG	GG	GG	GG	GG	GG	GG	GG	GG	GG	GG
SSL2.50ch01_79162795	C	T	CC	NN	CT	NN	CC	CT	CC	CC	CC	CT	TT	CC	CC	CC	CC	CC	NN	CC	CC	NN	CC	TT	CC	NN	CC	CC	NN	CC	CC	CC	CC	CC	CC	NN	CC	NN	CC	CC	CC	CC	CC	CC	CC	CC	CC	CC	CC
SSL2.50ch01_79163992	T	A	TT	TT	TT	TT	NN	TT	AA	AA	NN	NN	NN	NN	NN	NN	TT	TT	TT	TT	AA	TT	NN	NN	TT	AA	AT	TT	TT	TT	TT	TT	TT	TT	TT	TT	AT	TT	AA	TT	TT	TT	TT	AA	TT	TT	TT	TT	TT
SSL2.50ch01_79183206	C	T	CC	TT	CC	CC	CC	CC	CC	CC	CC	CC	CC	CC	CC	CC	CT	CC	CT	CC	CC	NN	CC	CC	CC	CC	CT	CC	NN	CC	TT	TT	TT	CC	CC	CC	CC	CC	CC	CC	CC	CC	TT	CC	CC	CC	CC	CC	CC
SSL2.50ch01_79245009	A	T	AA	AA	AA	AA	AA	AA	AA	AA	AA	AA	AA	AA	AA	AA	AA	TT	AA	AA	AA	AA	AA	AA	AA	AA	AA	AA	AA	AA	AA	AA	AA	AA	AA	TA	AA	AA	AA	AA	AA	AA	TT	AA	AA	AA	AA	AA	AA
SSL2.50ch01_79254894	A	C	AA	AA	AA	CC	AA	AA	AA	AA	AA	AA	AA	AA	AA	AA	AA	AA	AA	AA	AA	AA	AA	AA	AA	AA	AC	AC	CC	AA	AA	AA	AA	AA	AA	AA	AC	AC	AA	CC	CC	AA	AA	AA	AA	AA	AA	AA	AA
SSL2.50ch01_79263572	G	T	GG	GG	GG	GG	TT	GT	GG	GG	GG	TT	TT	TT	TT	GG	GT	GG	GT	TT	GG	GG	TT	GG	GG	GG	GG	GG	GG	GT	GG	GG	GG	GG	GG	GG	GG	GT	TT	GG	GG	GG	GG	GG	GG	GG	GG	GG	GG
SSL2.50ch01_79295723	C	T	CC	CC	CC	CC	CC	CT	CC	CC	TT	CC	CC	CC	CC	TT	CC	CC	CT	CC	CC	CC	CC	TT	CC	CC	CC	CC	CC	CC	CC	CC	CC	CC	CC	CT	CT	CC	CC	TT	CC	CC	CC	CC	CC	CC	CC	CC	CC
SSL2.50ch01_79295799	G	C	GG	GG	GG	GG	GG	CG	GG	GG	GG	CG	CC	GG	CC	GG	CG	GG	GG	GG	GG	GG	CC	GG	GG	GG	GG	GG	GG	GG	GG	GG	GG	GG	GG	GG	GG	GG	GG	GG	GG	GG	GG	GG	GG	GG	GG	GG	GG
SSL2.50ch01_79327659	C	T	CC	CC	CC	CC	CC	TT	CC	CC	TT	TT	TT	TT	TT	TT	TC	CC	CC	CC	CC	CC	TT	TT	CC	CC	CC	CC	CC	CC	CC	CC	CC	CC	CC	CC	CC	CC	CC	CC	CC	CC	CC	CC	CC	CC	CC	CC	CC
SSL2.50ch01_79327734	G	C	GG	GG	GG	GG	GG	GG	GG	GG	GG	GG	GG	GG	GG	GG	GG	GG	GG	GG	GG	GG	GG	GG	GG	GG	GG	CG	GG	CG	GG	GG	GG	GG	GG	GG	CG	CG	GG	GG	GG	GG	GG	GG	GG	GG	CC	GG	GG
SSL2.50ch01_79355970	T	C	TT	TT	TT	CC	CC	TT	TT	TT	TT	TT	TT	TT	TT	TT	TT	TT	TT	TT	TT	TT	TT	TT	TT	TT	TC	TT	TT	TT	TT	TT	TT	TT	TT	TT	TT	TT	TT	CC	TT	CC	TT	TT	TT	TT	TT	TT	TT
SSL2.50ch01_79386273	G	A	GG	GG	GG	GG	GG	GG	GG	GG	NN	GG	GG	AA	GG	GG	GG	GG	GG	GG	GG	GG	GG	GG	GG	GG	GG	GG	GG	GG	GG	GG	GG	GG	GG	GG	GG	GG	GG	GG	GG	GG	GG	GG	GG	GG	GG	GG	GG
SSL2.50ch01_79388719	G	A	GG	GG	GG	GG	GG	GG	GG	GG	NN	GG	GG	AA	GG	NN	GG	GG	GG	GG	GG	GG	GG	GG	GG	GG	NN	GA	GG	GG	GG	GG	GG	GG	GG	GG	GG	GG	GG	GG	GG	GG	GG	GG	GG	GG	GG	GG	GG
SSL2.50ch01_79388762	G	T	GG	GG	GG	GG	GG	GG	GG	GG	NN	GG	GG	GG	GG	NN	NN	GG	TT	GG	GG	TT	GG	GG	GG	GG	NN	GG	GG	GG	TT	GG	TT	TT	GG	GG	GG	GG	GG	GG	GG	GG	GG	GG	GG	GG	GG	GG	GG
SSL2.50ch01_79388852	C	A	CC	CC	AA	CC	CC	CC	CC	CC	CC	CC	CC	CC	CC	CC	CC	CC	CC	CC	CC	CC	CC	CC	CC	CC	CC	CC	CC	CC	CC	CC	CC	CC	CC	CC	CC	CC	CC	CC	CC	CC	CC	CC	CC	CC	CC	CC	CC
SSL2.50ch01_79394062	A	T	NN	AA	AA	AA	AA	AA	AA	AA	AA	AA	NN	AA	AA	AA	NN	AA	AA	AA	AA	AA	AA	AA	AA	AA	NN	NN	AA	NN	AA	TT	AA	AA	AA	AA	AA	NN	AA	AA	AA	AA	AA	NN	AA	AA	AA	AA	AA
SSL2.50ch01_79394974	C	A	CC	CC	CC	CC	CC	AC	CC	CC	AA	CC	CC	AA	CC	AA	CC	CC	CC	CC	CC	CC	CC	AA	CC	CC	CC	CC	CC	CC	CC	CC	CC	CC	CC	CC	CC	CC	CC	CC	CC	CC	CC	CC	CC	CC	CC	CC	NN
SSL2.50ch01_79402149	T	C	TT	TT	TT	TT	TT	CT	TT	TT	TT	TT	TT	TT	TT	TT	TT	TT	TT	TT	TT	TT	TT	TT	TT	TT	TT	TT	TT	TT	TT	TT	TT	TT	TT	TT	TT	TT	TT	CC	TT	TT	TT	TT	TT	TT	TT	TT	TT
SSL2.50ch01_79402216	T	A	TT	TT	TT	TT	TT	AA	TT	TT	AA	AT	AA	AA	TT	AA	TT	TT	TT	TT	TT	TT	TT	AA	TT	TT	TT	AT	TT	TT	TT	TT	TT	TT	TT	TT	TT	TT	TT	AA	TT	TT	TT	TT	TT	TT	TT	TT	TT
SSL2.50ch01_79405365	A	T	AA	AA	NN	AA	AA	AT	AA	AA	TT	AT	TT	TT	AA	TT	AA	AA	AA	AA	AA	AA	AA	NN	AA	AA	NN	AT	AA	NN	NN	AA	AA	AA	AA	NN	AA	AA	AA	AA	AA	AA	AA	AA	AA	AA	AA	AA	AA
SSL2.50ch01_79425352	G	A	AA	AA	GG	GG	GG	GG	GG	GG	GG	GG	GG	GG	GG	GG	GG	GG	GA	GG	GG	AA	GG	GG	GG	GG	GG	GA	AA	GA	GG	GG	GG	GG	GG	AA	GG	GG	AA	AA	AA	AA	GG	GG	AA	GG	AA	GG	AA
SSL2.50ch01_79425464	A	G	GG	GG	AA	AA	AA	NN	AA	AA	NN	GG	GG	GG	GG	NN	AA	AA	NN	AA	GG	NN	GG	NN	AA	GG	NN	AG	GG	GG	AA	AA	AA	AA	AA	GG	AA	AA	GG	GG	GG	GG	AA	GG	GG	AA	GG	AA	GG
SSL2.50ch01_79435082	A	T	AA	AA	AA	AA	AA	AA	AA	AA	AA	AA	AA	AA	AA	AA	AA	AA	AA	AA	AA	AA	AA	AA	AA	AA	AA	AA	AA	AA	AA	AA	AA	TT	AA	AA	AA	AA	AA	AA	AA	AA	AA	AA	AA	AA	AA	AA	AA
SSL2.50ch01_79440678	G	A	GG	GG	AA	GG	GG	GG	GG	GG	GG	GG	GG	GG	GG	GG	GG	GG	GG	GG	GG	GG	GG	GG	GG	GG	GG	GG	GG	GG	GG	GG	GG	GG	AA	GG	GG	GG	GG	GG	GG	GG	GG	GG	GG	GG	GG	AA	AA
SSL2.50ch01_79441927	C	T	TT	CC	TT	CC	TT	NN	TT	TT	TT	TT	CC	TT	TT	TT	TT	CC	CC	CC	CC	CC	TT	TT	TT	CC	CC	TT	CC	TC	CC	CC	CC	CC	TT	NN	CC	NN	CC	CC	CC	CC	CC	CC	CC	TT	TT	TT	TT
SSL2.50ch01_79441980	T	G	TT	TT	TT	TT	TT	NN	TT	TT	GG	TG	TT	TT	GG	TT	GG	TT	TT	TT	TT	TT	GG	GG	TT	TT	TT	TT	TT	TT	TT	TT	TT	TT	TT	NN	TT	NN	TT	TT	TT	TT	TT	TT	TT	TT	TT	TT	TT
SSL2.50ch01_79490260	G	C	GG	GG	GG	GG	GG	GG	GG	GG	GG	GG	GG	GG	GG	GG	GG	CC	GG	GG	GG	GG	GG	GG	GG	GG	GG	GG	GG	GG	GG	CC	GG	GG	GG	GG	GG	GG	GG	GG	GG	GG	GG	GG	GG	GG	GG	GG	GG
SSL2.50ch01_79495313	A	T	AA	AA	AA	AA	AA	AA	AA	AA	NN	TT	AA	TT	AA	AA	TT	AA	AA	AA	AA	AA	TT	AA	AA	AA	AA	AA	AA	AA	NN	AA	AA	AA	AA	AA	AA	AA	AA	AA	AA	AA	AA	AA	AA	AA	AA	AA	AA
SSL2.50ch01_79495335	A	G	AA	AA	AA	AA	AA	AA	AA	AA	NN	GG	AA	GG	AA	AA	GG	AA	AA	AA	AA	AA	GG	AA	AA	AA	AA	AA	AA	AA	NN	AA	AA	AA	AA	AA	AA	AA	AA	AA	AA	AA	AA	AA	AA	AA	AA	AA	AA
SSL2.50ch01_79497006	C	T	CC	CC	CC	CC	CC	TT	CC	CC	NN	TC	CC	TT	CC	TT	TT	CC	CC	CC	CC	CC	TT	CC	CC	CC	CC	CC	CC	CC	CC	CC	CC	CC	CC	CC	CC	CC	CC	CC	CC	CC	CC	CC	CC	CC	CC	CC	CC
SSL2.50ch01_79497013	A	G	AA	AA	AA	AA	AA	AA	AA	AA	NN	AA	AA	AA	AA	AA	AA	AA	GA	AA	AA	AA	AA	AA	AA	AA	AA	AA	AA	AA	AA	GG	AA	AA	AA	AA	GA	AA	AA	AA	AA	AA	AA	AA	AA	AA	AA	AA	AA
SSL2.50ch01_79497087	C	T	CC	CC	CC	CC	TT	CC	CC	CC	NN	TC	TT	CC	CC	CC	CC	CC	CC	CC	CC	CC	CC	CC	CC	CC	CC	CC	CC	CC	CC	CC	CC	CC	CC	CC	CC	CC	CC	CC	CC	CC	CC	CC	CC	CC	CC	CC	CC
SSL2.50ch01_79497859	G	A	GG	GG	GG	GG	GG	AA	GG	GG	NN	AG	GG	AA	NN	AA	AA	GG	GG	GG	GG	GG	AA	NN	GG	GG	GG	NN	GG	GG	GG	GG	GG	GG	GG	GG	GG	GG	GG	GG	GG	GG	GG	GG	GG	GG	GG	GG	GG
SSL2.50ch01_79543738	A	G	AA	AA	AA	GG	AA	GA	AA	AA	AA	AA	AA	AA	AA	AA	AA	AA	AA	AA	AA	AA	AA	AA	GG	AA	AA	AA	GG	GA	AA	AA	AA	AA	AA	AA	GG	AA	AA	AA	GG	AA	AA	AA	GG	AA	AA	AA	AA
SSL2.50ch01_79558489	C	G	CC	CC	CC	GG	CC	CC	CC	CC	CC	CC	CC	CC	CC	CC	CC	CC	CC	CC	CC	CC	CC	CC	GG	CC	CC	GC	CC	CC	CC	CC	CC	CC	CC	GG	GC	GC	CC	CC	GG	CC	CC	CC	GG	CC	CC	CC	CC
SSL2.50ch01_79558499	G	A	GG	GG	AA	GG	AA	GG	GG	AA	GG	GG	GG	GG	GG	GG	GG	GG	AA	AA	AA	GG	GG	GG	GG	AA	GA	GA	GG	GA	GG	GG	GG	GG	AA	GG	GG	GG	AA	AA	GG	GG	GG	AA	GG	GG	AA	AA	GG
SSL2.50ch01_79558622	A	T	TT	TT	AA	AA	AA	AT	TT	AA	AA	TT	TT	TT	TT	AA	TT	TT	AA	AA	AA	TT	TT	AA	TT	AA	AT	AA	TT	AT	TT	TT	TT	TT	AA	TT	TT	TT	AA	AA	AA	TT	TT	AA	AA	TT	AA	AA	TT
SSL2.50ch01_79610442	G	A	AA	AA	GG	GG	GG	GG	AA	AA	GG	AG	GG	AA	GG	GG	GG	AA	AG	GG	GG	AA	GG	GG	GG	GG	AA	AG	GG	AG	AA	AA	AA	AA	GG	GG	GG	GG	GG	GG	AA	GG	AA	GG	GG	AA	AA	AA	AA
SSL2.50ch01_79650907	T	A	TT	TT	TT	TT	TT	AA	TT	TT	AA	TA	TT	TT	TT	AA	AA	TT	TT	TT	TT	TT	AA	AA	TT	TT	TT	TT	TT	TT	TT	TT	TT	TT	TT	TT	TT	TT	TT	TT	TT	TT	TT	TT	TT	TT	TT	TT	TT
SSL2.50ch01_79651029	C	A	CC	CC	CC	AA	CC	CC	CC	CC	CC	CC	CC	CC	CC	CC	CC	CC	AA	CC	CC	AA	CC	CC	CC	CC	CC	CC	CC	CC	AA	CC	AA	AA	CC	CC	AC	CC	AA	CC	CC	CC	CC	AA	AC	CC	CC	AA	CC
SSL2.50ch01_79691568	T	C	CC	CC	TT	TT	TT	CC	TT	CC	CC	CC	TT	CC	TT	CC	TT	CC	TC	TT	CC	TT	TT	CC	CC	CC	CC	CC	CC	TC	TT	CC	TT	TT	TT	TC	TC	TT	CC	CC	CC	TT	TT	TT	TC	TT	CC	CC	TT
SSL2.50ch01_79691691	G	A	GG	AA	GG	GG	GG	AA	GG	GG	AA	AA	GG	AA	GG	AA	GG	AA	AG	GG	AA	GG	GG	AA	AA	AA	AA	GG	AA	GG	GG	AA	GG	GG	GG	GG	GG	GG	AA	GG	GG	GG	GG	GG	GG	GG	GG	AA	GG
SSL2.50ch01_79699326	T	C	CC	CC	TT	CC	TT	CT	CC	CC	CC	CC	TT	CC	CC	CC	CC	TT	CC	CC	CC	TT	CC	CC	TT	CC	CT	TT	CC	CT	TT	TT	TT	TT	TT	TT	TT	CC	TT	TT	TT	TT	TT	TT	CT	TT	TT	TT	TT
SSL2.50ch01_79701797	C	T	TT	TT	CC	TT	CC	CC	TT	TT	NN	CC	CC	CC	CC	CC	CC	CC	TT	TT	TT	CC	CC	CC	CC	TT	TC	CC	TT	TC	CC	CC	CC	CC	CC	CC	CC	TT	CC	CC	CC	CC	CC	CC	TC	CC	CC	CC	CC
SSL2.50ch01_79703477	T	C	TT	TT	TT	TT	TT	TT	TT	TT	TT	TT	TT	TT	TT	TT	TT	TT	TT	TT	TT	TT	TT	TT	TT	TT	TT	TT	TT	TT	TT	CC	TT	TT	TT	TT	TT	TT	TT	TT	TT	TT	TT	TT	TT	TT	TT	TT	TT
SSL2.50ch01_79729912	T	C	TT	TT	TT	CC	TT	TT	TT	TT	TT	TT	TT	TT	TT	TT	TT	TT	TT	TT	TT	TT	TT	TT	CC	TT	TT	TT	TT	TT	TT	TT	TT	TT	TT	TT	TT	TT	TT	TT	CC	TT	TT	TT	TT	TT	TT	TT	TT
SSL2.50ch01_79729934	G	A	GG	GG	GG	GG	GG	AG	GG	GG	AA	AG	GG	AA	AA	AA	AA	GG	AG	GG	GG	AA	AA	AA	GG	GG	GG	AG	GG	GG	AA	AA	AA	GG	GG	GG	AG	GG	GG	GG	GG	GG	GG	AA	AG	GG	GG	GG	AA
SSL2.50ch01_79729942	C	T	CC	CC	CC	CC	CC	CT	CC	CC	TT	CT	TT	TT	TT	TT	TT	CC	CT	CC	CC	TT	TT	TT	CC	CC	CC	CT	CC	CC	TT	TT	TT	CC	CC	CC	CT	CC	CC	CC	CC	CC	CC	TT	CT	CC	CC	CC	TT
SSL2.50ch01_79792837	T	G	GG	TT	TT	TT	TT	TG	TT	GG	NN	TG	GG	GG	GG	GG	GG	TT	TG	GG	TT	TT	GG	GG	GG	TT	NN	TT	TT	TG	TT	TT	TT	TT	TT	TT	GG	TG	TT	TT	TT	TT	TT	GG	TT	GG	GG	TT	GG
SSL2.50ch01_79792940	T	C	TT	TT	TT	TT	TT	CT	TT	CC	CC	CT	CC	CC	CC	CC	CC	TT	CT	CC	TT	TT	CC	CC	CC	TT	CT	TT	TT	CT	TT	TT	TT	TT	TT	TT	CC	CT	TT	TT	TT	TT	TT	CC	TT	CC	CC	TT	CC
SSL2.50ch01_79792948	T	G	TT	TT	TT	TT	TT	TT	TT	TT	GG	GT	GG	GG	GG	TT	GG	TT	TT	TT	TT	TT	GG	TT	TT	TT	TT	TT	TT	TT	TT	TT	TT	TT	TT	TT	TT	GT	TT	TT	TT	TT	TT	TT	TT	TT	TT	TT	TT
SSL2.50ch01_79808636	G	A	GG	GG	GG	GG	AA	GA	GG	GG	GG	GG	AA	GG	AA	GG	AA	GG	GG	GG	GG	GG	AA	AA	GG	GG	GG	GG	GG	GG	GG	AA	GG	GG	GG	GG	GG	GG	GG	GG	GG	GG	GG	GG	GG	GG	GG	GG	GG
SSL2.50ch01_79808726	C	T	CC	CC	CC	CC	CC	CC	CC	CC	CC	CC	TT	CC	TT	CC	TT	CC	CC	CC	CC	CC	TT	CC	CC	CC	CC	CC	CC	CC	CC	CC	CC	CC	CC	CC	CC	CC	CC	CC	CC	CC	CC	CC	CC	CC	CC	CC	CC
SSL2.50ch01_79822372	A	T	AA	AA	AA	AA	AA	TA	AA	AA	TT	AA	TT	AA	TT	AA	AA	AA	AA	AA	AA	AA	AA	TT	AA	AA	AA	AA	AA	AA	AA	AA	AA	AA	AA	AA	AA	AA	AA	AA	AA	AA	AA	AA	AA	AA	AA	AA	AA
SSL2.50ch01_79840667	C	T	CC	CC	CC	CC	CC	TC	CC	CC	TT	TC	CC	TT	TT	TT	TT	CC	CC	CC	CC	CC	TT	TT	CC	CC	CC	CC	CC	CC	CC	CC	CC	CC	CC	CC	CC	CC	CC	CC	CC	TT	CC	CC	CC	CC	CC	CC	CC
SSL2.50ch01_79855132	T	C	CC	CC	TT	TT	TT	TT	TT	TT	TT	TT	TT	TT	TT	TT	TT	CC	TT	TT	TT	TT	TT	NN	TT	TT	TC	TT	TT	TC	TT	CC	TT	TT	CC	TT	TT	TT	TT	TT	TT	TT	CC	TT	TT	TT	CC	TT	TT
SSL2.50ch01_79855200	A	C	AA	AA	AA	AA	AA	CC	AA	AA	NN	CC	CC	CC	CC	CC	AA	AA	AA	AA	AA	AA	AA	CC	AA	AA	AA	AA	AA	AA	AA	AA	AA	AA	AA	AA	NN	AA	AA	AA	AA	CC	AA	AA	NN	AA	AA	AA	AA
SSL2.50ch01_79856669	A	G	AA	AA	AA	AA	AA	GG	AA	AA	NN	GG	NN	GG	GG	GG	AA	AA	NN	AA	AA	AA	AA	GG	NN	AA	AA	AA	AA	AA	AA	AA	AA	AA	AA	AA	AA	AA	AA	AA	AA	GG	AA	AA	AA	AA	AA	AA	AA
SSL2.50ch01_79884469	A	T	AA	AA	AA	AA	AA	TA	AA	AA	AA	TT	AA	TT	TT	AA	NN	AA	AA	AA	AA	AA	TT	AA	TT	AA	AA	AA	AA	AA	AA	AA	AA	AA	AA	AA	AA	AA	AA	TT	AA	AA	AA	AA	AA	AA	AA	AA	AA
SSL2.50ch01_79884471	C	T	CC	CC	CC	CC	CC	TT	CC	CC	TT	NN	CC	NN	NN	TT	NN	CC	CC	CC	CC	CC	NN	TT	NN	CC	CC	CC	CC	CC	CC	CC	CC	CC	CC	CC	CC	CC	CC	NN	CC	TT	CC	CC	CC	CC	CC	CC	CC
SSL2.50ch01_79884478	T	A	TT	AA	TT	TT	TT	TT	AA	AA	TT	TT	TT	TT	TT	TT	NN	TT	TT	TT	TT	TT	TT	TT	TT	TT	TT	TT	TT	TT	TT	TT	TT	TT	TT	TT	TT	TT	TT	TT	TT	TT	TT	AA	TT	TT	TT	AA	TT
SSL2.50ch01_79884526	C	T	CC	TT	CC	CC	CC	CC	TT	TT	CC	CC	CC	CC	CC	CC	NN	CC	CC	CC	CC	CC	CC	CC	CC	CC	CC	CC	TT	CC	CC	CC	CC	CC	CC	CC	CC	CC	CC	CC	CC	CC	CC	TT	CC	CC	CC	TT	CC
SSL2.50ch01_79890096	A	G	GG	AA	AA	GG	GG	GG	AA	AA	GG	GG	GG	GG	GG	GG	GG	AA	AG	GG	GG	AA	GG	GG	GG	GG	AG	AG	AA	AA	AA	AA	AA	AA	AA	AA	GG	GG	GG	AA	AA	GG	AA	AA	AG	AA	AA	AA	AA
SSL2.50ch01_79892915	A	C	CC	AA	AA	CC	CC	CC	AA	AA	CC	CC	CC	CC	CC	CC	CC	AA	AC	CC	CC	AA	CC	CC	CC	CC	AC	CC	AA	AA	AA	AA	AA	AA	AA	AA	CC	AC	CC	AA	AA	CC	AA	AA	AC	AA	AA	AA	AA
SSL2.50ch01_79892946	C	T	TT	CC	CC	TT	TT	TT	CC	CC	TT	TT	TT	TT	TT	TT	TT	CC	CT	TT	TT	CC	TT	TT	TT	TT	CT	TT	CC	CC	CC	CC	CC	CC	CC	CC	TT	CT	TT	CC	CC	TT	CC	CC	CT	CC	CC	CC	CC
SSL2.50ch01_79923611	A	T	AA	TT	AA	TT	AA	AT	AA	AA	TT	AA	AA	AA	TT	TT	TT	AA	NN	AA	AA	NN	TT	TT	AA	AA	AT	AA	AA	AA	AA	AA	AA	AA	AA	AA	AA	AA	AA	AA	AA	AA	AA	AA	AA	AA	AA	AA	AA
SSL2.50ch01_79929904	A	G	AA	AA	GG	AA	AA	AA	AA	AA	AA	AA	AA	AA	AA	AA	AA	AA	AG	GG	AA	AA	AA	AA	AA	AA	AA	AG	AA	AG	AA	AA	AA	AA	AA	AA	AA	AA	AA	AA	AA	AA	AA	AA	AG	AA	AA	AA	AA
SSL2.50ch01_79929972	T	C	CC	TT	CC	CC	TT	CT	CC	TT	TT	TT	TT	TT	TT	CC	TT	CC	CC	CC	CC	TT	TT	CC	TT	CC	CC	CC	CC	CC	CC	CC	CC	CC	TT	TT	TT	TT	TT	TT	TT	TT	CC	CC	CT	TT	CC	TT	CC
SSL2.50ch01_79961449	A	G	AA	AA	AA	GG	AA	AA	AA	AA	AA	AA	AA	AA	AA	AA	AA	AA	GG	GG	GG	AA	AA	AA	GA	GG	AA	GA	AA	GA	AA	AA	AA	AA	GG	AA	AA	AA	GG	GG	GG	AA	AA	AA	AA	AA	GG	AA	AA
SSL2.50ch01_79961549	C	T	CC	CC	CC	TT	CC	CT	CC	CC	CC	CC	CC	CC	CC	TT	CC	CC	CT	TT	TT	CC	CC	TT	CT	TT	CC	CC	CC	CT	NN	CC	CC	CC	TT	CC	CC	CC	TT	TT	TT	CC	CC	CC	CT	CC	TT	CC	CC
SSL2.50ch01_79961567	C	T	CC	CC	CC	CC	CC	CC	CC	CC	CC	CC	CC	CC	CC	CC	CC	CC	CC	CC	CC	CC	CC	CC	CC	CC	CC	CC	CC	CC	NN	CC	CC	CC	CC	CT	CC	CC	CC	CC	CC	CC	CC	CC	CC	CC	CC	TT	TT
SSL2.50ch01_79998140	C	T	CC	CC	CC	TT	CC	CC	CC	CC	CC	CC	CC	CC	CC	CC	CC	CC	CC	CC	CC	TT	CC	CC	TC	CC	CC	CC	TT	CC	CC	CC	CC	TT	CC	TT	CC	CC	CC	CC	CC	CC	CC	CC	CC	CC	CC	CC	CC
SSL2.50ch01_79998294	G	C	GG	GG	GG	CC	GG	CG	GG	CC	CC	GG	GG	GG	CC	CC	GG	GG	GG	GG	GG	CC	GG	CC	CG	GG	GG	GG	CC	GG	GG	GG	GG	CC	GG	GG	GG	GG	GG	GG	GG	GG	GG	GG	GG	GG	GG	GG	GG
SSL2.50ch01_80016782	A	G	AA	AA	AA	AA	AA	GG	AA	AA	AA	AA	GG	AA	AA	GG	GG	AA	AA	AA	AA	AA	GG	GG	AA	AA	AA	AA	AA	AA	AA	AA	AA	AA	AA	GA	AA	AA	AA	AA	AA	AA	AA	AA	AA	AA	AA	AA	AA
SSL2.50ch01_80112317	T	C	TT	TT	TT	TT	TT	CC	TT	TT	TT	CT	CC	TT	CC	CC	TT	CC	CC	CC	CC	CC	CC	CC	TT	CC	CT	CT	TT	TT	TT	CC	TT	CC	TT	CT	TT	CT	TT	TT	TT	TT	CC	TT	CT	TT	CC	TT	CC
SSL2.50ch01_80139834	G	C	GG	GG	GG	CC	GG	GG	GG	GG	GG	GG	GG	GG	GG	GG	GG	CC	GG	GG	GG	GG	GG	GG	GG	GG	GG	GG	GG	GG	GG	CC	GG	GG	GG	GC	CC	GG	CC	GG	GG	GG	CC	GG	GG	GG	GG	GG	GG
SSL2.50ch01_80176030	A	G	AA	AA	AA	AA	AA	GA	AA	AA	GG	AA	AA	AA	AA	GG	AA	AA	AA	AA	AA	AA	GG	GG	AA	AA	AA	AA	AA	AA	AA	AA	AA	AA	AA	AA	AA	AA	AA	AA	AA	AA	AA	AA	AA	AA	AA	AA	AA
SSL2.50ch01_80176123	G	A	GG	GG	GG	GG	GG	GG	GG	GG	GG	AA	GG	AA	GG	GG	AA	GG	GG	GG	GG	GG	GG	GG	GG	GG	GG	GG	GG	GG	GG	GG	GG	GG	GG	GG	NN	GG	GG	GG	GG	GG	GG	GG	GG	GG	GG	GG	GG
SSL2.50ch01_80178366	G	C	GG	GG	CC	GG	GG	GG	CC	GG	GG	GG	GG	GG	GG	GG	GG	GG	GG	GG	GG	GG	GG	GG	GG	GG	NN	GG	GG	GC	CC	GG	CC	GG	CC	CC	GG	GC	GG	GG	CC	GG	GG	CC	GG	GG	GG	CC	GG
SSL2.50ch01_80178367	A	T	AA	AA	TT	AA	AA	AA	TT	AA	AA	AA	AA	AA	AA	AA	AA	AA	AA	AA	AA	AA	AA	AA	AA	AA	NN	AA	AA	TA	TT	AA	TT	AA	TT	TT	AA	TA	AA	AA	TT	AA	AA	TT	AA	AA	AA	TT	AA
SSL2.50ch01_80199740	T	C	TT	TT	TT	TT	TT	TT	TT	TT	TT	TT	TT	TT	TT	TT	TT	TT	TT	TT	TT	TT	TT	TT	TT	TT	TT	TT	TT	TT	TT	TT	TT	TT	TT	CT	CC	TT	TT	TT	TT	TT	TT	TT	TT	TT	CC	TT	TT
SSL2.50ch01_80268457	T	C	TT	TT	TT	TT	TT	TC	TT	TT	CC	TT	TT	TT	CC	CC	CC	TT	TT	TT	TT	TT	CC	CC	TT	TT	TT	TT	TT	TT	TT	TT	TT	TT	TT	TT	TT	TT	TT	TT	TT	TT	TT	TT	TT	TT	TT	TT	TT
SSL2.50ch01_80268458	C	T	CC	CC	CC	CC	CC	TC	CC	CC	TT	CC	CC	CC	TT	TT	TT	CC	CC	CC	CC	CC	TT	TT	CC	CC	CC	CC	CC	CC	CC	CC	CC	CC	CC	CC	CC	CC	CC	CC	CC	CC	CC	CC	CC	CC	CC	CC	CC
SSL2.50ch01_80268483	A	C	AA	AA	AA	AA	AA	CA	AA	AA	CC	AA	AA	AA	CC	CC	CC	AA	AA	AA	AA	AA	CC	CC	AA	AA	AA	AA	AA	AA	AA	AA	AA	AA	AA	AA	AA	AA	AA	AA	AA	AA	AA	AA	AA	AA	AA	AA	AA
SSL2.50ch01_80282057	A	T	AA	AA	AA	TT	AA	AT	AA	AA	TT	AA	AA	AA	TT	TT	TT	AA	AT	TT	AA	TT	TT	TT	AA	AA	AA	AA	AA	AA	AA	TT	AA	TT	AA	AA	AA	AA	AA	AA	AA	AA	AA	AA	AA	AA	AA	AA	AA
SSL2.50ch01_80319367	T	A	TT	TT	TT	AA	TT	TT	TT	TT	TT	TT	TT	TT	TT	TT	TT	TT	TA	AA	TT	TT	TT	TT	TT	TT	TA	TT	TT	TT	TT	TT	TT	TT	TT	AA	TT	TT	AA	TT	TT	TT	TT	AA	TA	TT	TT	TT	AA
SSL2.50ch01_80321656	G	A	GG	GG	GG	GG	GG	GG	GG	GG	GG	GG	GG	GG	GG	GG	GG	GG	GG	GG	GG	AA	GG	GG	GG	GG	GA	GG	NN	GG	GG	GG	GG	AA	GG	GG	GG	GG	GG	GG	GG	GG	GG	GG	GG	GG	GG	GG	GG
SSL2.50ch01_80321748	G	T	GG	TT	TT	GG	GG	GG	TT	TT	GG	GT	GG	TT	GG	GG	GG	TT	GT	GG	TT	GG	GG	GG	GG	TT	GT	GT	TT	GT	TT	TT	TT	GG	GG	GG	TT	GT	GG	TT	GG	TT	GG	GG	GT	TT	TT	GG	GG
SSL2.50ch01_80335520	T	C	TT	CC	CC	TT	TT	CT	CC	TT	TT	TT	TT	TT	TT	TT	TT	TT	NN	TT	TT	TT	TT	TT	CC	TT	TT	TT	CC	TT	TT	TT	TT	TT	TT	TT	CC	CC	TT	CC	TT	CC	TT	NN	TT	TT	TT	TT	TT
SSL2.50ch01_80337924	A	G	AA	AA	AA	GG	GG	AA	AA	AA	GG	AA	AA	AA	GG	AA	AA	AA	AG	GG	GG	AA	AA	AA	AA	GG	AG	AA	AA	AA	AA	AA	AA	AA	AA	AA	AA	AA	AA	AA	GG	AA	AA	GG	AG	AA	AA	AA	GG
SSL2.50ch01_80337934	G	C	GG	GG	GG	CC	CC	GG	GG	GG	GG	GG	GG	GG	GG	GG	GG	GG	CG	CC	CC	GG	GG	GG	GG	CC	CG	GG	GG	GG	GG	GG	GG	GG	GG	GG	GG	GG	GG	GG	CC	GG	GG	CC	CG	GG	GG	GG	CC
SSL2.50ch01_80388646	A	T	TT	AA	TT	AA	AA	AA	TT	AA	AA	AA	AA	AA	AA	AA	AA	AA	AT	TT	AA	AA	AA	AA	AA	AA	AA	AA	AA	AA	AA	AA	AA	AA	AA	TT	AA	AA	AA	TT	TT	AA	AA	AT	TT	AA	AA	AA	AA
SSL2.50ch01_80405605	C	A	CC	CC	CC	CC	CC	AA	AA	CC	AA	AA	AA	AA	AA	AA	AA	CC	NN	AA	CC	CC	AA	AA	CC	CC	AC	CC	CC	AC	CC	CC	CC	CC	CC	AA	CC	AC	CC	CC	CC	CC	CC	AA	CC	AA	AA	CC	AA
SSL2.50ch01_80410916	C	T	CC	CC	CC	CC	CC	TT	TT	CC	TT	TT	TT	TT	TT	TT	TT	CC	TC	TT	CC	CC	TT	TT	CC	CC	NN	CC	CC	TC	CC	CC	CC	CC	CC	TT	CC	TC	CC	CC	CC	CC	CC	TT	CC	TT	TT	CC	TT
SSL2.50ch01_80417618	A	G	AA	AA	AA	AA	AA	NN	AA	AA	NN	AA	AA	AA	AA	AA	AA	AA	AG	GG	AA	NN	AA	AA	AA	AA	AG	AA	AA	NN	AA	AA	AA	AA	AA	GG	AA	AG	AA	AA	AA	AA	AA	AA	AA	AA	AA	AA	AA
SSL2.50ch01_80425319	G	A	GG	GG	GG	NN	GG	NN	GG	GG	NN	GG	GG	GG	GG	NN	GG	NN	NN	AA	GG	NN	GG	GG	GG	NN	NN	GG	GG	GG	GG	GG	GG	GG	GG	AA	GG	NN	GG	GG	GG	GG	GG	GG	GG	GG	GG	GG	GG
SSL2.50ch01_80426567	C	G	CC	CC	CC	CC	GG	GG	CC	CC	GG	GG	GG	GG	GG	GG	GG	CC	NN	CC	CC	NN	GG	GG	GG	NN	GC	NN	CC	CC	CC	CC	CC	CC	CC	CC	CC	NN	CC	CC	CC	CC	CC	CC	CC	GG	CC	CC	GG
SSL2.50ch01_80432375	A	G	AA	AA	AA	AA	AA	AA	AA	AA	AA	AA	AA	AA	AA	AA	AA	AA	AA	AA	AA	AA	AA	AA	AA	AA	AA	AG	AA	AA	AA	AA	AA	AA	AA	AA	AA	AA	AA	AA	AA	AA	GG	AA	AA	GG	AA	GG	AA
SSL2.50ch01_80432389	G	C	GG	GG	GG	GG	GG	CG	GG	GG	CC	GG	GG	GG	CC	CC	CC	GG	GG	GG	GG	GG	CC	CC	GG	GG	GG	GG	GG	GG	GG	GG	GG	GG	GG	GG	GG	GG	GG	GG	GG	GG	GG	GG	GG	GG	GG	GG	GG
SSL2.50ch01_80432406	T	C	CC	TT	TT	TT	CC	TT	CC	TT	TT	CC	TT	CC	TT	TT	TT	TT	TT	TT	TT	TT	TT	TT	CC	TT	TT	TT	TT	CT	CC	CC	CC	TT	CC	CC	TT	CT	TT	CC	TT	TT	TT	TT	TT	TT	TT	TT	TT
SSL2.50ch01_80434155	A	C	AA	AA	AA	AA	AA	CC	AA	AA	AA	AA	AA	AA	AC	CC	CC	AA	AA	AA	AA	NN	CC	CC	AA	AA	AA	AA	AA	AA	AA	AA	AA	AA	AA	AA	AA	AA	AA	AA	AA	AA	AA	AA	AA	AA	AA	AA	AA
SSL2.50ch01_80442470	C	T	CC	CC	CC	CC	CC	CT	CC	TT	TT	CC	CC	CC	TT	TT	TT	CC	CT	CC	CC	TT	TT	TT	CC	CC	CC	CC	CC	CC	TT	CC	TT	TT	CC	CC	CC	CC	CC	CC	CC	TT	CC	CC	CC	CC	CC	CC	CC
SSL2.50ch01_80460292	G	A	GG	GG	AA	GG	GG	GG	GG	GG	GG	GG	GG	GG	GG	NN	GG	GG	AG	AA	GG	GG	GG	GG	GG	GG	GG	GG	NN	GG	GG	GG	GG	GG	NN	AA	GG	GG	GG	GG	GG	AA	GG	GG	GG	GG	GG	GG	GG
SSL2.50ch01_80475488	T	G	TT	TT	TT	TT	TT	TG	TT	TT	GG	TT	GG	TT	TT	GG	GG	TT	TT	TT	TT	TT	GG	GG	TT	TT	TT	TG	TT	TT	TT	TT	TT	TT	TT	TT	TT	TT	GG	TT	TT	TT	TT	TT	TT	TT	TT	TT	TT
SSL2.50ch01_80475576	T	C	TT	TT	TT	TT	TT	CT	TT	TT	CC	TT	CC	TT	TT	CC	CC	TT	TT	TT	TT	TT	CC	CC	TT	TT	TT	CT	TT	TT	TT	TT	TT	TT	TT	TT	TT	TT	CC	TT	TT	TT	TT	TT	TT	TT	TT	TT	TT
SSL2.50ch01_80475584	T	G	TT	TT	TT	TT	TT	GT	TT	TT	GG	TT	GG	TT	TT	GG	GG	TT	TT	TT	TT	TT	GG	GG	TT	TT	TT	GT	TT	TT	TT	TT	TT	TT	TT	TT	TT	TT	GG	TT	TT	TT	TT	TT	TT	TT	TT	TT	TT
SSL2.50ch01_80475620	G	C	GG	GG	GG	GG	GG	CG	GG	GG	CC	GG	CC	GG	GG	CC	CC	GG	GG	GG	GG	GG	CC	CC	GG	GG	GG	CG	GG	GG	GG	GG	GG	GG	GG	GG	GG	GG	CC	GG	GG	GG	GG	GG	GG	GG	GG	GG	GG
SSL2.50ch01_80516870	T	C	TT	TT	TT	TT	CC	TT	NN	TT	TT	TT	CC	TT	TT	TT	TT	TT	TT	TT	TT	CC	TT	TT	CC	TT	CC	TT	TT	TC	CC	TT	CC	CC	CC	TT	CC	TT	CC	TT	CC	TT	CC	CC	CC	CC	TT	CC	CC
SSL2.50ch01_80516883	T	C	TT	TT	TT	TT	TT	TC	NN	TT	CC	CC	TT	CC	CC	CC	CC	TT	TT	TT	TT	TT	CC	CC	TT	TT	TT	TC	CC	TT	TT	TT	TT	TT	TT	TT	TT	NN	TT	CC	TT	TT	TT	TT	TT	TT	TT	TT	TT
SSL2.50ch01_80523169	A	T	AA	AA	AA	AA	AA	TA	AA	AA	TT	TT	TT	TT	TT	AA	AA	AA	AA	AA	AA	AA	TT	AA	AA	AA	AA	TA	TA	TA	AA	AA	AA	AA	AA	AA	AA	TT	AA	AA	AA	AA	AA	AA	AA	AA	AA	AA	AA
SSL2.50ch01_80544252	T	G	TT	TT	TT	TT	TT	TT	TT	TT	TT	GT	GG	TT	GG	TT	TT	TT	TT	TT	TT	TT	GG	TT	TT	TT	TT	TT	TT	TT	TT	TT	TT	TT	TT	TT	TT	TT	TT	TT	TT	TT	TT	TT	TT	TT	TT	TT	TT
SSL2.50ch01_80544256	A	G	AA	AA	AA	AA	AA	AA	AA	AA	AA	AA	AA	AA	AA	AA	AA	AA	AG	GG	GG	AA	AA	AA	GG	GG	AG	AA	AA	AA	AA	AA	AA	AA	GG	GG	AA	AA	AA	AA	AA	AA	AA	AA	AG	GG	AA	GG	AA
SSL2.50ch01_80548400	C	T	CC	TT	CC	CC	TT	TC	TT	TT	TT	TC	CC	TT	TT	TT	TT	TT	CC	CC	CC	CC	TT	TT	CC	CC	CC	CC	CC	TC	CC	TT	CC	CC	CC	CC	TT	TC	TT	CC	TT	CC	CC	TT	CC	CC	CC	CC	CC
SSL2.50ch01_80548492	A	C	AA	CC	AA	AA	CC	AC	CC	CC	CC	AC	AA	CC	CC	CC	CC	CC	AA	AA	AA	AA	CC	CC	AA	AA	AA	AA	AA	AC	AA	CC	AA	AA	AA	AA	CC	AC	CC	AA	CC	AA	AA	CC	AA	AA	AA	AA	AA
SSL2.50ch01_80548506	T	C	TT	TT	TT	TT	CC	CT	TT	TT	TT	CT	TT	CC	CC	CC	CC	TT	TT	TT	TT	TT	CC	CC	TT	TT	TT	TT	TT	TT	TT	TT	TT	TT	TT	TT	TT	TT	CC	TT	TT	TT	TT	TT	TT	TT	TT	TT	TT
SSL2.50ch01_80553568	T	C	NN	CC	TT	TT	NN	NN	CC	CC	NN	NN	TT	CC	CC	TC	CC	CC	TT	TT	TT	TT	CC	CC	TT	TT	TT	TT	TT	TC	TT	CC	TT	NN	TT	TT	CC	NN	CC	NN	CC	TT	TT	CC	TT	TT	TT	TT	NN
SSL2.50ch01_80556295	T	C	TT	CC	TT	TT	TT	TT	TT	CC	TT	TT	TT	TT	TT	TT	TT	TT	TT	TT	TT	TT	TT	NN	TT	TT	TT	TT	TT	TC	TT	TT	TT	TT	TT	TT	CC	TT	TT	TT	TT	TT	TT	CC	TT	TT	TT	TT	TT
SSL2.50ch01_80556340	T	A	TT	AA	TT	TT	AA	TA	AA	AA	AA	TA	TT	AA	AA	AA	AA	AA	TT	TT	TT	TT	AA	NN	TT	TT	TT	TT	TT	TA	TT	AA	TT	TT	TT	TT	AA	TA	AA	TT	AA	TT	TT	AA	TT	TT	TT	TT	TT
SSL2.50ch01_80557649	A	G	AA	AA	AA	AA	GG	NN	AA	AA	NN	AA	AA	AA	GG	NN	GG	AA	AA	AA	AA	AA	AA	GG	AA	AA	AA	AA	AA	AA	AA	AA	AA	AA	AA	AA	AA	NN	GG	AA	AA	AA	AA	AA	AA	AA	AA	AA	AA
SSL2.50ch01_80566096	C	T	CC	TT	CC	CC	TT	TC	TT	TT	TT	TC	CC	TT	TT	TT	TT	TT	CC	CC	CC	CC	TT	TT	CC	CC	CC	CC	CC	NN	CC	TT	CC	CC	CC	CC	TT	TC	TT	CC	TT	CC	CC	TT	CC	CC	CC	CC	CC
SSL2.50ch01_80591054	T	C	TT	TT	TT	TT	TT	CT	TT	TT	TT	CT	CC	TT	TT	TT	TT	CC	CT	TT	TT	TT	TT	TT	TT	TT	TT	TT	TT	TT	TT	TT	TT	TT	TT	TT	TT	TT	TT	TT	TT	TT	TT	TT	CT	TT	TT	TT	TT
SSL2.50ch01_80624680	C	T	CC	CC	CC	CC	CC	NN	CC	NN	NN	TT	NN	TT	CC	TT	TT	CC	CC	CC	CC	CC	TT	TT	CC	NN	CC	CC	CC	NN	CC	CC	CC	CC	CC	CC	CC	CC	CC	CC	CC	CC	CC	CC	CC	CC	CC	CC	CC
SSL2.50ch01_80636797	A	T	AA	AA	TT	AA	AA	AA	AA	AA	AA	AA	AA	AA	AA	AA	AA	AA	AA	AA	TT	AA	AA	AA	AA	TT	AA	AA	AA	AA	AA	AA	AA	AA	AA	AA	AA	AA	AA	AA	AA	AA	AA	TT	AA	AA	AA	AA	AA
SSL2.50ch01_80641079	A	G	AA	AA	GG	AA	AA	AA	AA	AA	AA	AA	AA	AA	AA	AA	AA	AA	AA	AA	GG	AA	AA	AA	AA	GG	AA	AA	AA	AA	AA	AA	AA	AA	AA	AA	AA	AA	AA	AA	AA	AA	AA	GG	AA	AA	AA	AA	AA
SSL2.50ch01_80647056	C	T	CC	CC	CC	CC	CC	TT	CC	CC	TT	TT	CC	TT	TT	TT	TT	CC	CC	CC	CC	CC	TT	TT	CC	CC	CC	CC	CC	CC	CC	CC	CC	CC	CC	CC	CC	CC	CC	CC	CC	CC	CC	CC	CC	CC	CC	CC	CC
SSL2.50ch01_80659569	A	G	AA	AA	AA	AA	GG	GG	AA	AA	GG	AG	AA	GG	GG	GG	GG	AA	AA	AA	AA	GG	GG	GG	AA	AA	AA	AG	AA	GG	AA	AA	AA	AA	AA	AA	GG	AA	AA	AA	AA	AA	AA	AA	AA	AA	GG	AA	AA
SSL2.50ch01_80687338	A	G	AA	GG	AA	AA	GG	GG	AA	AA	AA	AA	AA	AA	AA	AA	AA	AA	AA	AA	AA	GG	AA	AA	AA	AA	AA	AA	AA	NN	GG	AA	GG	AA	AA	AA	AA	AA	AA	AA	AA	AA	AA	AA	AA	AA	AA	AA	AA
SSL2.50ch01_80687342	A	G	AA	GG	AA	AA	GG	GG	AA	AA	AA	AA	AA	AA	AA	AA	AA	AA	AA	AA	AA	GG	AA	AA	AA	AA	AA	AA	AA	NN	GG	AA	GG	AA	AA	AA	AA	AA	AA	AA	AA	AA	AA	AA	AA	AA	AA	AA	AA
SSL2.50ch01_80687362	T	C	TT	CC	TT	TT	CC	CC	TT	TT	TT	TT	TT	TT	TT	TT	TT	TT	TT	TT	TT	CC	TT	TT	TT	TT	TT	TT	TT	NN	CC	TT	CC	TT	TT	TT	TT	TT	TT	TT	TT	TT	TT	TT	TT	TT	TT	TT	TT
SSL2.50ch01_80687363	C	A	CC	AA	CC	CC	AA	AA	CC	CC	CC	CC	CC	CC	CC	CC	CC	CC	CC	CC	CC	AA	CC	CC	CC	CC	CC	CC	CC	NN	AA	CC	AA	CC	CC	CC	CC	CC	CC	CC	CC	CC	CC	CC	CC	CC	CC	CC	CC
SSL2.50ch01_80687381	A	T	AA	TT	AA	AA	TT	TT	AA	AA	AA	AA	AA	AA	AA	AA	AA	AA	AA	AA	AA	TT	AA	AA	AA	AA	AA	AA	AA	NN	TT	AA	TT	AA	AA	AA	AA	AA	AA	AA	AA	AA	AA	AA	AA	AA	AA	AA	AA
SSL2.50ch01_80687385	T	A	TT	AA	TT	TT	AA	AA	TT	TT	TT	TT	TT	TT	TT	TT	TT	TT	TT	TT	TT	AA	TT	TT	TT	TT	TT	TT	TT	NN	AA	TT	AA	TT	TT	TT	TT	TT	TT	TT	TT	TT	TT	TT	TT	TT	TT	TT	TT
SSL2.50ch01_80687401	T	C	TT	CC	TT	TT	CC	CC	TT	TT	TT	TT	TT	TT	TT	TT	TT	TT	TT	TT	TT	CC	TT	TT	TT	TT	TT	TT	TT	NN	CC	TT	CC	TT	TT	TT	TT	TT	TT	TT	TT	TT	TT	TT	TT	TT	TT	TT	TT
SSL2.50ch01_80687412	C	A	CC	AA	CC	CC	AA	AA	CC	CC	CC	CC	CC	CC	CC	CC	CC	CC	CC	CC	CC	AA	CC	CC	CC	CC	CC	CC	CC	NN	AA	CC	AA	CC	CC	CC	CC	CC	CC	CC	CC	CC	CC	CC	CC	CC	CC	CC	CC
SSL2.50ch01_80687505	T	C	CC	NN	TT	TT	NN	TT	TT	TT	TT	TT	TT	TT	TT	TT	TT	TT	CT	CC	TT	NN	TT	TT	TT	TT	TT	TT	CT	TT	NN	TT	NN	TT	TT	TT	TT	TT	TT	TT	TT	CC	TT	TT	CT	TT	TT	CC	TT
SSL2.50ch01_80690424	A	G	AA	AA	AA	AA	GG	GG	AA	AA	AA	GG	AA	GG	GG	GG	AA	AA	AA	AA	AA	AA	AA	GG	AA	AA	AA	AA	AA	GA	AA	AA	AA	AA	AA	AA	AA	AA	AA	AA	AA	AA	AA	AA	AA	AA	AA	AA	AA
SSL2.50ch01_80691579	G	T	GG	GG	GG	GG	GG	GG	GG	GG	GG	GG	GG	GG	GG	GG	GG	TT	GT	GG	TT	GG	GG	GG	GG	TT	GT	GG	GG	GG	GG	TT	GG	GG	GG	GG	GG	GT	GG	GG	GG	GG	TT	GG	GG	GG	GG	GG	GG
SSL2.50ch01_80700835	T	C	TT	CC	CC	TT	TT	TT	TT	CC	CC	TT	TT	TT	TT	TT	TT	CC	TC	TT	CC	CC	TT	TT	TT	CC	TC	TT	TT	TT	CC	CC	CC	CC	TT	TT	TT	TC	TT	TT	TT	CC	CC	TT	TT	TT	TT	TT	CC
SSL2.50ch01_80712742	A	G	AA	AA	GG	AA	AA	GA	AA	AA	GG	GG	AA	GG	AA	AA	AA	AA	AA	AA	AA	AA	AA	AA	AA	AA	AA	AA	AA	AA	AA	AA	AA	AA	AA	AA	AA	AA	AA	AA	GG	AA	AA	AA	AA	AA	AA	AA	AA
SSL2.50ch01_80714799	T	C	TT	TT	CC	TT	TT	NN	TT	TT	CC	CC	TT	CC	CC	NN	TT	TT	TT	TT	TT	TT	TT	CC	TT	TT	TT	TT	TT	NN	NN	TT	TT	TT	NN	TT	TT	TT	TT	NN	CC	TT	TT	TT	TT	TT	TT	TT	TT
SSL2.50ch01_80718991	T	A	AA	TT	TT	TT	AA	TT	TT	TT	TT	TT	TT	TT	TT	TT	TT	TT	TA	AA	AA	NN	TT	TT	TT	AA	TA	TA	TT	TA	TT	TT	TT	TT	TT	TT	AA	TT	TT	TT	TT	TT	TT	AA	TA	TT	TT	TT	TT
SSL2.50ch01_80720109	A	T	AA	AA	AA	AA	AA	AT	AA	AA	AA	AA	AA	AA	TT	TT	TT	AA	AA	AA	AA	AA	TT	TT	AA	AA	AA	AA	AA	AA	AA	AA	AA	AA	AA	AA	AA	AA	AA	AA	AA	AA	AA	AA	AA	AA	AA	AA	AA
SSL2.50ch01_80733437	A	C	AA	AA	AA	AA	AA	NN	AA	AA	AA	CC	CC	CC	NN	AA	AA	AA	AA	AA	AA	AA	AA	AA	AA	AA	AA	AA	AA	AA	AA	AA	AA	AA	AA	NN	AA	AA	AA	AA	AA	AA	AA	AA	AA	AA	AA	AA	AA
SSL2.50ch01_80733554	T	C	TT	TT	TT	TT	TT	CC	TT	TT	TT	CC	CC	CC	CC	CC	CC	TT	TT	TT	TT	TT	CC	CC	TT	TT	TT	TT	TT	TT	TT	TT	TT	TT	TT	TT	TT	TT	TT	TT	TT	TT	TT	TT	TT	TT	TT	TT	TT
SSL2.50ch01_80738589	T	A	TT	TT	TT	TT	TT	AA	TT	TT	TT	AA	AA	AA	TT	AA	AA	TT	TT	TT	TT	TT	AA	AA	TT	TT	TT	TT	TT	TT	TT	TT	TT	TT	TT	TT	TT	TT	TT	TT	TT	TT	TT	TT	TT	TT	TT	TT	TT
SSL2.50ch01_80765741	C	T	CC	TT	CC	CC	CC	CC	CC	CC	CC	TT	CC	TT	CC	CC	TT	CC	CC	CC	CC	NN	TT	CC	CC	CC	CC	CC	CC	CC	TT	CC	TT	CC	CC	CC	CC	CC	CC	CC	CC	CC	CC	CC	CC	CC	CC	CC	CC
SSL2.50ch01_80765828	A	C	CC	NN	CC	AA	AA	AA	AA	AA	AA	AA	AA	AA	AA	AA	AA	AA	AA	AA	AA	AA	AA	AA	AA	AA	AA	AA	AA	AA	NN	AA	NN	AA	AA	AA	AA	AA	AA	AA	AA	AA	AA	AA	AC	AA	AA	AA	AA
SSL2.50ch01_80803784	G	A	AA	GG	GG	GG	AA	GG	GG	GG	AA	AA	GG	AA	AA	GG	AA	GG	GG	GG	GG	GG	AA	GG	GG	GG	GG	GG	GG	GG	GG	GG	GG	GG	GG	AA	GG	GG	GG	GG	GG	GG	GG	GG	AG	GG	GG	GG	GG
SSL2.50ch01_80803841	T	C	TT	TT	TT	TT	TT	TT	TT	TT	TT	TT	TT	TT	TT	TT	TT	TT	CC	CC	CC	TT	TT	TT	TT	CC	NN	TT	TT	TT	TT	CC	TT	TT	TT	TT	TT	NN	TT	TT	TT	TT	CC	TT	TT	TT	TT	TT	TT
SSL2.50ch01_80806852	T	C	TT	TT	TT	CC	TT	TT	TT	TT	TT	TT	TT	TT	TT	TT	TT	TT	CC	CC	CC	TT	TT	TT	CT	CC	CT	TT	TT	TT	TT	CC	TT	TT	TT	TT	TT	CC	TT	TT	TT	TT	CC	TT	TT	TT	TT	TT	TT
SSL2.50ch01_80815422	G	A	GG	GG	GG	AA	GG	GG	GG	GG	GG	GG	GG	GG	GG	GG	GG	GG	GA	AA	GG	GG	GG	GG	GG	GG	GG	GG	GG	GG	AA	GG	AA	GG	GG	GG	GG	GA	GG	GG	GG	GG	GG	GG	GG	GG	GG	GG	GG
SSL2.50ch01_80815464	G	A	GG	GG	GG	GG	GG	GG	GG	GG	GG	GA	GG	AA	GG	GG	GG	GG	GG	GG	GG	GG	GG	GG	GG	GG	GG	GA	GG	GG	GG	GG	GG	GG	GG	GG	GG	GA	GG	GG	GG	GG	GG	GG	GG	GG	GG	GG	GG
SSL2.50ch01_80815504	A	G	AA	AA	AA	AA	AA	AA	AA	AA	AA	AG	AA	GG	AA	AA	AA	AA	AA	AA	AA	AA	AA	AA	AA	AA	AA	AG	AA	AA	AA	AA	AA	AA	AA	AA	AA	AG	AA	AA	AA	AA	AA	AA	AA	AA	AA	AA	AA
SSL2.50ch01_81013927	C	T	CC	TT	CC	CC	CC	CC	CC	CC	CC	CC	CC	CC	CC	CC	CC	TT	TC	CC	CC	CC	CC	CC	CC	CC	TC	CC	CC	CC	TT	TT	TT	TT	CC	CC	CC	CC	CC	CC	CC	CC	TT	CC	CC	CC	CC	CC	CC
SSL2.50ch01_81013967	C	A	CC	AA	CC	CC	CC	CC	CC	CC	CC	CC	CC	CC	CC	CC	CC	AA	AC	CC	CC	CC	CC	CC	CC	CC	AC	CC	CC	CC	AA	AA	AA	AA	CC	CC	CC	CC	CC	CC	CC	CC	AA	CC	CC	CC	CC	CC	CC
SSL2.50ch01_81013989	C	A	CC	CC	CC	CC	CC	CC	CC	CC	CC	CC	CC	CC	CC	CC	CC	CC	CC	CC	CC	CC	CC	CC	AA	CC	CC	AC	CC	CC	CC	CC	CC	CC	CC	CC	CC	CC	CC	CC	CC	CC	CC	CC	CC	CC	CC	CC	CC
SSL2.50ch01_81019463	A	G	AA	GG	AA	AA	GG	AA	AA	AA	AA	AA	AA	AA	AA	AA	AA	GG	AG	AA	AA	AA	AA	AA	AA	AA	AG	AA	AG	AA	GG	AA	GG	GG	AA	AA	AA	AA	AA	AA	AA	AA	GG	AA	AA	AA	AA	AA	AA
SSL2.50ch01_81031182	G	C	GG	CC	GG	GG	NN	NN	GG	GG	GG	GG	GG	GG	GG	GG	NN	CC	GC	NN	NN	NN	GG	GG	CC	NN	CC	GC	GG	GG	GG	CC	GG	NN	GG	GG	GG	GG	CC	GG	GG	GG	CC	NN	NN	GG	GG	NN	NN
SSL2.50ch01_81034953	G	A	GG	GG	NN	GG	GG	GG	GG	GG	NN	AA	AA	AA	AA	AA	AA	GG	GG	GG	AA	GG	AA	AA	GG	NN	NN	GG	NN	NN	AA	GG	AA	GG	GG	GG	GG	GA	GG	AA	AA	GG	GG	GG	GG	AA	GG	GG	GG
SSL2.50ch01_81035352	C	T	CT	CT	CC	CC	CC	CC	CT	CT	CC	CC	CC	CC	CC	CC	CC	CT	CC	CT	CC	CC	CC	CC	CC	CC	CT	CC	CT	CT	CC	CC	CC	CC	CT	CC	CC	CT	CT	CT	CC	CC	CT	CT	CT	CT	CC	CC	CC
SSL2.50ch01_81035367	C	T	CT	CT	CC	CC	CC	CC	CT	CT	CC	CC	CC	CC	CC	CC	CC	CT	CC	CT	CC	CC	CC	CC	CC	CC	CT	CC	CT	CT	CC	CC	CC	CC	CT	CC	CC	CT	CT	CT	CC	CC	CT	CT	CT	CT	CC	CC	CC
SSL2.50ch01_81035410	C	A	AC	AC	CC	CC	CC	CC	AC	AC	CC	CC	CC	CC	CC	CC	CC	AC	CC	AC	CC	CC	CC	CC	CC	CC	AC	CC	AC	AC	CC	CC	CC	CC	AC	CC	CC	AC	AC	AC	CC	CC	AC	AC	AC	AC	CC	CC	CC
SSL2.50ch01_81058307	G	A	AA	GG	GG	GG	GG	GG	NN	GG	AA	AA	AA	AA	AA	GG	AA	GG	GA	AA	AA	GG	AA	GG	AA	GG	GG	GG	GG	GG	GG	AA	GG	GG	GG	GG	GG	AA	AA	AA	AA	GA	GG	AA	GA	GG	GG	GG	GG
SSL2.50ch01_81058764	G	A	AA	GG	GG	GG	GG	AG	AA	GG	AA	AA	AA	AA	AA	AA	AA	GG	AG	AA	AA	NN	AA	AA	AA	GG	GG	GG	GG	AG	GG	AA	GG	GG	GG	GG	GG	AA	AA	AA	AA	AG	GG	AA	AG	GG	GG	GG	GG
SSL2.50ch01_81058805	C	T	TT	CC	CC	CC	CC	CT	TT	CC	TT	TT	TT	TT	TT	TT	TT	CC	CT	TT	TT	NN	TT	TT	TT	CC	CC	CC	CC	CT	CC	TT	CC	CC	CC	CC	CC	TT	TT	TT	TT	CT	CC	TT	CT	CC	CC	CC	CC
SSL2.50ch01_81096251	C	T	CC	CC	CC	TT	TT	CC	CC	CC	CC	CC	CC	CC	CC	CC	CC	CC	TC	TT	TT	NN	CC	CC	TT	TT	CC	TC	TC	TC	CC	CC	CC	CC	CC	CC	TT	TC	TT	TT	TT	TT	CC	TT	CC	TT	TT	TT	TT
SSL2.50ch01_81096261	A	G	AA	AA	AA	GG	GG	AA	AA	AA	AA	AA	AA	AA	AA	AA	AA	AA	GA	GG	GG	NN	AA	AA	GG	GG	AA	GA	GA	GA	AA	AA	AA	AA	AA	AA	GG	GA	GG	GG	GG	GG	AA	GG	AA	GG	GG	GG	GG
SSL2.50ch01_81096956	C	T	CC	CC	CC	CC	CC	CC	TT	TT	CC	CC	CC	CC	CC	CC	CC	TT	CT	CC	CC	TT	CT	CC	CC	CC	CT	CC	CC	CC	TT	TT	TT	CC	CC	CC	CC	CC	CC	CC	CC	CC	TT	CC	CC	CC	CC	CC	CC
SSL2.50ch01_81096978	T	C	TT	TT	TT	CC	CC	TT	TT	TT	TT	TT	TT	TT	TT	TT	TT	TT	CT	CC	CC	TT	TT	TT	CC	CC	TT	CT	CT	CT	TT	TT	TT	TT	TT	TT	CC	CT	CC	CC	CC	CC	TT	CC	TT	CC	CC	CC	CC
SSL2.50ch01_81096979	T	C	TT	TT	TT	CC	CC	TT	TT	TT	TT	TT	TT	TT	TT	TT	TT	TT	CT	CC	CC	TT	TT	TT	CC	CC	TT	CT	CT	CT	TT	TT	TT	TT	TT	TT	CC	CT	CC	CC	CC	CC	TT	CC	TT	CC	CC	CC	CC
SSL2.50ch01_81108844	A	G	AA	GG	AA	NN	AA	GG	AA	AA	GG	GG	NN	GG	GG	GG	GG	AA	NN	GG	AA	AA	GG	GG	GG	AA	AA	AA	AA	NN	AA	AA	AA	GG	AA	NN	AA	AA	AA	AA	AA	GG	AA	AA	AG	AA	AA	GG	AA
SSL2.50ch01_81118874	A	G	AA	AA	AA	AA	AA	AA	AA	AA	GG	GA	AA	GG	GG	AA	AA	AA	AA	AA	AA	AA	AA	AA	AA	AA	AA	AA	AA	GA	AA	AA	AA	AA	AA	AA	AA	AA	AA	AA	AA	AA	AA	AA	AA	AA	AA	AA	AA
SSL2.50ch01_81118967	A	G	AA	GG	AA	AA	AA	AA	AA	AA	AA	AA	AA	AA	AA	AA	AA	AA	AA	AA	AA	AA	AA	AA	AA	AA	AA	AA	AA	AA	AA	AA	AA	AG	AA	AA	AA	AA	AA	AA	AA	AA	AA	AA	AA	AA	AA	AA	AA
SSL2.50ch01_81126334	A	G	AA	AA	AA	AA	AA	GA	AA	AA	GG	GG	GG	GG	GG	AA	AA	AA	AA	AA	AA	AA	AA	AA	AA	AA	AA	AA	AA	GA	AA	AA	AA	AA	AA	AA	AA	AA	AA	AA	AA	GG	AA	AA	AA	AA	AA	AA	AA
SSL2.50ch01_81146053	T	C	TT	TT	TT	TT	TT	TT	CC	CC	NN	TT	TT	TT	TT	TT	TT	CC	CT	TT	TT	CC	CT	NN	TT	NN	CT	TT	NN	NN	CC	CC	CC	TT	TT	TT	TT	NN	TT	TT	TT	TT	CC	TT	TT	NN	TT	TT	TT
SSL2.50ch01_81254185	T	A	NN	TT	TT	TT	TT	AA	TT	TT	AA	AA	NN	AA	TT	AA	AA	TT	TT	TT	TT	TT	AT	AA	TT	TT	TT	TT	TT	TT	TT	TT	TT	TT	TT	TT	TT	TT	TT	TT	TT	TT	TT	NN	TT	TT	TT	TT	TT
SSL2.50ch01_81256174	G	A	GG	GG	GG	AA	GG	GG	AA	GG	GG	GG	GG	GG	GG	GG	GG	GG	GG	GG	GG	GG	GG	NN	GG	GG	AG	AG	NN	GG	GG	GG	GG	GG	GG	GG	GG	NN	GG	GG	GG	GG	GG	GG	GG	GG	GG	GG	GG
SSL2.50ch01_81257905	A	T	AA	AA	AA	TT	AA	TT	TT	TT	TT	TT	TT	TT	AA	TT	TT	AA	AA	AA	AA	TT	TT	TT	TA	AA	TT	AA	TA	AA	TT	AA	TT	TT	AA	AA	AA	AA	AA	AA	AA	AA	AA	AA	AA	AA	AA	AA	AA
SSL2.50ch01_81318865	T	C	TT	TT	TT	TT	TT	CT	TT	TT	CC	CT	TT	CC	CC	CC	TT	TT	TT	TT	TT	TT	TT	CC	TT	TT	TT	TT	TT	TT	TT	TT	TT	TT	TT	TT	CC	TT	TT	TT	TT	TT	TT	CC	TT	TT	TT	TT	TT
SSL2.50ch01_81340691	C	G	CC	CC	CC	CC	CC	CC	CC	CC	CC	CC	CC	CC	CC	CC	GG	GG	CC	CC	CC	CC	CG	CC	CC	CC	CC	CC	CC	CC	CC	CC	CC	CC	CC	CC	CC	CC	CC	CC	CC	CC	GG	CC	CC	CC	CC	CC	CC
SSL2.50ch01_81621427	T	A	TT	TT	TT	TT	TT	AA	TT	TT	AA	AA	AA	AA	AA	AA	AA	TT	TT	TA	TT	TT	TA	AA	TT	TT	TT	TA	TA	TA	TT	TT	TT	TT	TT	TT	TT	TT	AA	TT	TT	TT	TT	TT	TT	TT	TT	AA	TT
SSL2.50ch01_81621564	T	A	TT	TT	TT	TT	TT	AA	TT	TT	AA	AA	AA	AA	AA	AA	AA	TT	AT	TT	TT	TT	AT	NN	TT	TT	TT	AT	AT	AT	TT	TT	TT	TT	TT	TT	TT	TT	AA	TT	TT	TT	TT	TT	TT	TT	TT	AA	TT
SSL2.50ch01_81623014	G	A	GG	GG	GG	AA	AA	AA	GG	GG	AA	AA	AA	AA	GG	AA	GG	GG	AA	GG	GG	GG	GG	AA	GG	AA	GG	NN	GG	GA	GG	GG	GG	GG	AA	GG	AA	GG	AA	AA	GG	AA	GG	GG	GG	GG	AA	AA	AA
SSL2.50ch01_81623033	A	G	AA	AA	AA	GG	GG	GG	AA	AA	GG	GG	GG	GG	AA	GG	AA	AA	GG	AA	AA	AA	AA	GG	AA	GG	AA	NN	AA	GA	AA	AA	AA	AA	GG	AA	GG	AA	GG	GG	AA	GG	AA	AA	AA	AA	GG	GG	GG
SSL2.50ch01_81623042	G	T	GG	GG	GG	TT	TT	TT	GG	GG	TT	TT	TT	TT	GG	TT	GG	GG	TT	GG	GG	GG	GG	TT	GG	TT	GG	NN	GG	TG	GG	GG	GG	GG	TT	GG	TT	GG	TT	TT	GG	TT	GG	GG	GG	GG	TT	TT	TT
SSL2.50ch01_81623057	G	A	GG	GG	GG	AA	AA	AA	GG	GG	AA	AA	AA	AA	GG	AA	GG	GG	AA	GG	GG	GG	GG	AA	GG	AA	GG	NN	GG	GA	GG	GG	GG	GG	AA	GG	AA	GG	AA	AA	GG	AA	GG	GG	GG	GG	AA	AA	AA
SSL2.50ch01_81623059	C	T	CC	CC	CC	TT	TT	TT	CC	CC	TT	TT	TT	TT	CC	TT	CC	CC	TT	CC	CC	CC	CC	TT	CC	TT	CC	NN	CC	TC	CC	CC	CC	CC	TT	CC	TT	CC	TT	TT	CC	TT	CC	CC	CC	CC	TT	TT	TT
SSL2.50ch01_81623114	A	T	AA	AA	AA	TT	TT	TT	AA	AA	NN	AA	TT	TT	AA	TT	AA	AA	AT	AA	AA	AA	AA	TT	AA	TT	AA	AA	AT	AT	AA	AA	AA	AA	TT	AA	TT	AA	TT	TT	AA	TT	AA	AA	AA	AA	TT	TT	TT
SSL2.50ch01_81623146	C	T	CC	CC	CC	TT	TT	TT	CC	CC	NN	CC	TT	TT	CC	TT	CC	CC	CT	CC	CC	CC	CC	TT	CC	TT	CC	CC	CT	CT	CC	CC	CC	CC	TT	CC	TT	CC	TT	TT	CC	TT	CC	CC	CC	CC	TT	TT	TT
SSL2.50ch01_81645608	A	T	AA	AA	AA	TT	AA	AA	AA	AA	AA	AA	AA	AA	AA	AA	AA	AA	AA	AA	TT	AA	AA	AA	AA	AA	AA	TA	AA	AA	AA	AA	AA	AA	AA	AA	AA	AA	TT	AA	AA	AA	AA	AA	AA	AA	AA	AA	AA
SSL2.50ch01_81661589	C	T	CC	CC	CC	TT	CC	CC	CC	CC	CC	CC	CC	CC	CC	CC	CC	CC	CC	CC	CC	TT	CC	CC	TC	CC	TC	TT	CC	CC	TT	CC	TT	TT	CC	CC	TT	CC	TT	CC	CC	CC	CC	CC	TC	CC	CC	CC	CC
SSL2.50ch01_81673319	A	T	TT	AA	TT	AA	AA	AA	AA	AA	AA	AA	AA	AA	AA	TT	AA	AA	AA	TA	TT	AA	AA	TT	AA	TT	AA	TA	TA	TT	AA	AA	AA	AA	TT	TT	AA	TT	AA	TT	TT	TT	TT	TT	TA	TT	TT	TT	TT
SSL2.50ch01_81693849	C	T	CC	TT	TT	CC	CC	CC	TT	TT	CC	CC	CC	CC	CC	CC	CC	CC	CC	TC	CC	TT	TC	NN	CC	CC	TC	CC	TT	TC	CC	TT	CC	TT	TT	CC	TT	CC	TT	CC	CC	CC	TT	TT	TC	TT	TT	TT	TT
SSL2.50ch01_81701579	C	G	CC	CC	CC	CC	CC	CC	CC	CC	CC	CC	CC	CC	CC	GG	CC	GG	CG	CC	CC	CC	CC	GG	CC	CC	CC	CC	CC	CC	CC	CC	CC	GG	CC	CC	CC	CC	CC	CC	CC	CC	CC	CC	CC	CC	CC	CC	CC
SSL2.50ch01_81760313	C	A	CC	AA	CC	CC	CC	CA	CC	AA	CC	AA	AA	AA	CC	CC	CC	AA	CA	CC	CC	AA	CA	CC	CA	CC	CA	CC	CC	CC	AA	AA	AA	AA	CC	CC	CC	CC	CC	CC	CC	CC	CC	CC	CC	CC	CC	CC	CC
SSL2.50ch01_81760349	G	A	GG	GG	GG	GG	GG	GG	GG	GG	GG	GG	GG	GG	GG	GG	GG	AA	GG	GG	GG	GG	GA	GG	GG	GG	GA	GG	GG	GG	AA	AA	AA	GG	GG	GG	GG	GG	GG	GG	GG	GG	GG	GG	GG	GG	GG	GG	GG
SSL2.50ch01_81760364	C	T	CC	TT	CC	CC	CC	CC	CC	TT	CC	CC	CC	CC	CC	CC	CC	CC	TC	CC	CC	TT	CC	CC	CC	CC	CC	CC	CC	CC	CC	CC	CC	TT	CC	CC	CC	CC	CC	CC	CC	CC	CC	CC	CC	CC	CC	CC	CC
SSL2.50ch01_81760436	G	A	GG	AG	GG	GG	GG	GG	GG	AG	NN	AG	AG	AG	GG	NN	NN	GG	NN	GG	GG	AG	AG	GG	AG	GG	GG	NN	NN	NN	NN	AA	AG	GG	GG	GG	GG	GG	GG	GG	GG	GG	GG	GG	GG	GG	GG	GG	GG
SSL2.50ch01_81760444	T	A	TT	AT	TT	TT	TT	TT	TT	AT	NN	AT	AT	AT	TT	NN	NN	TT	NN	TT	TT	AT	AT	TT	AT	TT	TT	NN	NN	NN	NN	AA	AT	TT	TT	TT	TT	TT	TT	TT	TT	TT	TT	TT	TT	TT	TT	TT	TT
SSL2.50ch01_81760456	C	G	CC	CG	CC	CC	CC	CC	CC	CG	NN	CG	CG	CG	CC	NN	NN	CC	NN	CC	CC	CG	CG	CC	CG	CC	CC	NN	NN	NN	NN	GG	CG	CC	CC	CC	CC	CC	CC	CC	CC	CC	CC	CC	CC	CC	CC	CC	CC
SSL2.50ch01_81761688	C	A	CA	CA	CA	CA	CA	CA	CA	CA	NN	CA	CA	CA	CA	NN	CA	CC	AA	CA	CA	NN	CA	NN	CA	CA	NN	CA	CA	CC	CA	CA	CC	CA	CA	CA	CA	NN	AA	CA	CA	CA	CA	CC	CC	CA	CA	CA	CA
SSL2.50ch01_81761694	G	A	GA	GA	GA	GA	GA	GA	GA	GA	NN	GA	GA	GA	GA	NN	GA	GG	AA	GA	GA	NN	GA	NN	GA	GA	NN	GA	GA	GG	GA	GA	GG	GA	GA	GA	GA	NN	AA	GA	GA	GA	GA	GG	GG	GA	GA	GA	GA
SSL2.50ch01_81761729	A	C	AC	AC	AC	AC	AC	AA	AC	AC	AC	AC	AC	AA	AC	CC	AC	AC	AA	AC	AC	NN	AC	CC	AC	AC	AA	AC	AC	AA	AA	AC	AC	AC	AC	AC	AA	AC	AC	AC	AC	AC	AC	AC	AC	AC	AC	AC	AC
SSL2.50ch01_81761730	T	C	CT	CT	CT	CT	CT	TT	CT	CT	CT	CT	CT	TT	CT	CC	CT	CT	TT	CT	CT	NN	CT	CC	CT	CT	TT	CT	CT	TT	TT	CT	CT	CT	CT	CT	TT	CT	CT	CT	CT	CT	CT	CT	CT	CT	CT	CT	CT
SSL2.50ch01_81761739	T	C	CT	CT	CT	CT	CT	TT	CT	CT	CT	CT	CT	TT	CT	CC	CT	CT	TT	CT	CT	NN	CT	CC	CT	CT	TT	CT	CT	TT	TT	CT	CT	CT	CT	CT	TT	CT	CT	CT	CT	CT	CT	CT	CT	CT	CT	CT	CT
SSL2.50ch01_81761740	T	C	CT	CT	CT	CT	CT	TT	CT	CT	CT	CT	CT	TT	CT	CC	CT	CT	TT	CT	CT	NN	CT	CC	CT	CT	TT	CT	CT	TT	TT	CT	CT	CT	CT	CT	TT	CT	CT	CT	CT	CT	CT	CT	CT	CT	CT	CT	CT
SSL2.50ch01_81761751	A	G	AA	AG	AA	AG	AA	AG	AG	AG	AA	AG	AG	GG	AG	AA	AA	AG	AG	AA	AG	NN	AG	AA	AA	AA	AG	AA	AA	AA	GG	AG	AG	AG	AA	AA	AA	AA	AA	AA	AG	AG	AA	AA	AA	AG	AA	AA	AA
SSL2.50ch01_81761753	A	T	AT	AT	AT	AT	AT	AA	AT	AT	AT	AT	AT	AA	AT	TT	AT	AT	AA	AT	AT	NN	AT	TT	AT	AT	AA	AT	AT	AA	AA	AT	AT	AT	AT	AT	AA	AT	AT	AT	AT	AT	AT	AT	AT	AT	AT	AT	AT
SSL2.50ch01_81761761	G	A	AG	AG	AG	AG	AG	GG	AG	AG	AG	AG	AG	GG	AG	AA	AG	AG	GG	AG	AG	NN	AG	AA	AG	AG	GG	AG	AG	GG	GG	AG	AG	AG	AG	AG	GG	AG	AG	AG	AG	AG	AG	AG	AG	AG	AG	AG	AG
SSL2.50ch01_81761770	T	C	CT	CT	CT	CT	CT	TT	CT	CT	CT	CT	CT	TT	CT	CC	CT	CT	TT	CT	CT	NN	CT	CC	CT	CT	TT	CT	CT	TT	TT	CT	CT	CT	CT	CT	TT	CT	CT	CT	CT	CT	CT	CT	CT	CT	CT	CT	CT
SSL2.50ch01_81761793	C	A	AC	AC	AC	AC	AC	CC	AC	AC	AC	AC	AC	CC	AC	AA	AC	AC	CC	AC	AC	NN	AC	AA	AC	AC	CC	AC	AC	CC	CC	AC	AC	AC	AC	AC	CC	AC	AC	AC	AC	AC	AC	AC	AC	AC	AC	AC	AC
SSL2.50ch01_81763122	A	G	AA	AA	AA	AA	AA	AA	AA	AA	GG	AA	AA	AA	GG	GG	AA	AA	AA	AA	AA	AA	AA	GG	AA	AA	AA	AA	AA	AA	AA	AA	AA	AA	AA	AA	AA	AA	AA	AA	AA	AA	AA	AA	AA	AA	AA	AA	AA
SSL2.50ch01_81775360	G	T	GG	GG	TT	GG	GG	GG	GG	GG	TT	TT	TT	TT	TT	TT	TT	GG	GG	TG	GG	GG	TG	GG	TG	GG	TG	GG	GG	GG	GG	GG	GG	GG	GG	GG	TT	TG	GG	GG	TT	GG	GG	GG	GG	GG	GG	GG	GG
SSL2.50ch01_81809795	A	T	AA	TT	AA	AA	AA	NN	AA	AA	NN	AA	AA	AA	TT	NN	TT	AA	AA	AA	AA	NN	AA	TT	AA	AA	AA	AA	AA	AA	NN	AA	AA	AA	TT	NN	AA	AA	AA	AA	TT	AA	AA	AA	AA	AA	AA	AA	AA
SSL2.50ch01_81810596	C	T	CC	TT	CC	CC	CC	CT	CC	CC	TT	CC	CC	CC	TT	TT	TT	CC	CC	CC	CC	CC	CT	TT	CC	CC	CC	CC	CC	CC	CC	CC	CC	CC	TT	CC	CC	CC	CC	CC	TT	CC	CC	CC	CC	CC	CC	CC	CC
SSL2.50ch01_81810619	A	G	AA	GG	AA	AA	AA	AG	AA	AA	GG	AA	AA	AA	GG	GG	GG	AA	AA	AA	AA	AA	AG	GG	AA	AA	AA	AA	AA	AA	AA	AA	AA	AA	GG	AA	AA	AA	AA	AA	GG	AA	AA	AA	AA	AA	AA	AA	AA
SSL2.50ch01_81821199	A	T	AA	AA	AA	AA	TT	TT	AA	AA	TT	TT	TT	TT	TT	TT	TT	AA	AA	AA	AA	AA	TA	TT	TA	AA	AA	AA	AA	AA	AA	AA	AA	AA	AA	AA	AA	AA	AA	AA	AA	AA	AA	TT	AA	AA	AA	AA	AA
SSL2.50ch01_81859252	A	G	AA	AA	AA	AA	AA	AG	AA	AA	GG	AG	AA	GG	GG	GG	AA	AA	AA	AA	AA	AA	AA	GG	AA	AA	AA	AA	AA	AA	AA	AA	AA	AA	AA	AA	AA	AA	AA	AA	AA	AA	AA	AA	AA	AA	AA	AA	AA
SSL2.50ch01_81863117	A	G	AA	GG	AA	GG	AA	AA	AA	AA	AA	AA	AA	AA	AA	AA	AA	AA	AA	AA	AA	AA	AA	AA	AA	AA	AA	AA	AA	AA	GG	AA	GG	AA	AA	AA	AA	AA	AA	AA	AA	AA	AA	AA	AA	AA	GG	AA	AA
SSL2.50ch01_81887300	C	T	CC	TT	CC	CC	CC	CT	CC	CC	TT	CT	CC	TT	TT	TT	TT	CC	CT	CC	CC	CC	CT	TT	CC	CC	CT	CC	CC	CC	CC	CC	CC	CC	CC	CC	CC	CC	CC	CC	CC	CC	CC	CC	CC	CC	CC	CC	CC
SSL2.50ch01_81898800	G	A	GG	GG	GG	GG	GG	GA	GG	GG	AA	GA	GG	AA	AA	GG	AA	AA	GG	GG	GG	AA	AA	GG	GG	GG	GA	GG	GG	GG	GG	AA	GG	GG	GG	GG	GG	GG	GG	GG	GG	GG	AA	GG	GG	GG	GG	GG	GG
SSL2.50ch01_81904073	A	G	AA	AA	AA	AA	AA	AA	AA	AA	AA	AA	AA	AA	AA	AA	AA	AA	AG	AA	AA	AA	AA	AA	AA	AA	AA	AA	AA	AA	GG	AA	GG	GG	AA	AA	AA	AA	AA	AA	AA	AA	AA	AA	AA	AA	AA	AA	AA
SSL2.50ch01_81921709	T	A	TT	TT	TT	TT	TT	AA	TT	TT	AA	AA	AA	AA	AA	AA	AA	TT	TT	TT	TT	TT	TA	AA	TT	TT	TT	TT	TT	TT	TT	TT	TT	TT	TT	TT	TT	TT	TT	TT	TT	TT	TT	TT	TT	TT	TT	TT	TT
SSL2.50ch01_81928346	G	A	AA	GG	AA	GG	AA	GG	AA	AA	GG	GG	GG	GG	GG	GG	GG	GG	GG	GA	AA	AA	GG	GG	GG	AA	GA	GG	AA	GG	GG	GG	GG	GG	AA	AA	GG	GG	GG	GG	AA	AA	GG	GG	GG	GG	AA	AA	GG
SSL2.50ch01_81947542	A	C	AA	AA	NN	NN	AA	AA	CC	CC	NN	AA	AA	AA	AA	NN	AA	AA	AA	AA	AA	AA	AA	AA	AA	CC	AA	NN	AA	AA	AA	AA	AA	AA	AA	CC	AA	AA	AA	AA	AA	AA	AA	AA	AA	AA	AA	AA	AA
SSL2.50ch01_81947547	A	G	AA	AA	NN	NN	AA	AA	AA	AA	NN	AA	AA	GG	GG	NN	GG	AG	AA	AA	AA	AA	AG	AA	AA	AA	AA	AA	AA	AA	AA	AA	AA	AA	AA	AA	AA	AA	AA	AA	AA	AA	AA	AA	AA	AA	AA	AA	AA
SSL2.50ch01_81948628	G	T	GG	GG	GG	TT	GG	NN	TT	TT	GG	GG	GG	GG	GG	GG	GG	GG	GG	NN	GG	GG	GG	GG	GG	TT	GG	NN	GG	GG	GG	GG	GG	GG	GG	TT	GG	GG	GG	GG	GG	GG	GG	GG	GG	GG	GG	GG	GG
SSL2.50ch01_81948636	A	G	AA	AA	AA	GG	AA	NN	GG	GG	AA	AA	AA	AA	AA	AA	AA	AA	AA	NN	AA	AA	AA	AA	AA	GG	AA	AA	AA	AA	AA	AA	AA	AA	AA	GG	AA	AA	AA	AA	AA	AA	AA	AA	AA	AA	AA	AA	AA
SSL2.50ch01_81967507	T	A	TT	TT	TT	TT	TT	TA	TT	TT	AA	TA	TT	AA	AA	AA	AA	TT	TT	TT	TT	TT	TA	AA	TT	AA	TT	TT	TT	TT	TT	TT	TT	TT	TT	TT	TT	TA	TT	TT	AA	TT	TT	TT	TT	TT	TT	TT	TT
SSL2.50ch01_81967514	G	A	GG	GG	GG	GG	GG	GA	GG	GG	AA	GA	GG	AA	AA	AA	AA	GG	GG	GG	GG	GG	GA	AA	GG	AA	GG	GG	GG	GG	GG	GG	GG	GG	GG	GG	GG	GA	GG	GG	AA	GG	GG	GG	GG	GG	GG	GG	GG
SSL2.50ch01_81967605	A	T	AA	AA	AA	AA	AA	AT	AA	AA	TT	AT	AA	TT	TT	TT	TT	AA	AA	AA	AA	AA	AT	TT	AA	AA	AA	AA	AA	AA	AA	AA	AA	AA	AA	AA	AA	AT	AA	AA	TT	AA	AA	AA	AA	AA	AA	AA	AA
SSL2.50ch01_81967645	T	C	TT	TT	TT	TT	TT	CT	TT	TT	CC	CT	TT	CC	CC	CC	CC	TT	TT	TT	TT	TT	CT	CC	TT	TT	TT	TT	TT	TT	TT	TT	TT	TT	TT	TT	TT	TT	TT	TT	TT	TT	TT	TT	TT	TT	TT	TT	TT
SSL2.50ch01_82007755	T	A	TT	TT	TT	TT	TT	AA	TT	TT	AA	TA	AA	AA	AA	AA	AA	TT	TT	TT	TT	TT	TA	AA	TT	TT	TT	TT	NN	TT	TT	TT	TT	TT	TT	AA	TT	TT	TT	TT	TT	TT	TT	TT	TT	TT	TT	TT	TT
SSL2.50ch01_82016406	A	T	AA	TT	AA	AA	AA	AA	AA	AA	AA	AA	AA	AA	AA	AA	AA	TT	AA	AA	AA	TT	TA	AA	AA	AA	TT	AA	AA	AA	AA	TT	AA	TT	TT	AA	AA	AA	AA	TT	AA	AA	AA	AA	TA	AA	AA	AA	AA
SSL2.50ch01_82016500	T	A	TT	AA	TT	TT	AA	AA	TT	AA	TT	TT	AA	TT	AA	TT	AA	AA	TT	TT	TT	AA	AA	TT	AA	NN	AA	AT	TT	AT	TT	NN	TT	AA	AA	TT	TT	TT	AA	AA	TT	TT	TT	TT	AT	TT	TT	TT	TT
SSL2.50ch01_82019412	C	T	TT	CC	TT	TT	TT	CC	CC	CC	CC	CC	CC	CC	CC	CC	CC	CC	CC	CC	TT	CC	CC	CC	CC	CC	CT	CT	CC	CT	TT	CC	TT	CC	CC	CC	TT	CC	CC	TT	TT	TT	CC	TT	CT	TT	CC	TT	TT
SSL2.50ch01_82019418	A	C	AA	AA	AA	AA	AA	AA	CC	AA	AA	AA	AA	AA	AA	AA	AA	CC	AC	AC	AA	AA	AA	AA	AA	AA	AA	AC	AA	AA	AA	AA	AA	AA	AA	AA	AA	AA	CC	AA	AA	AA	CC	AA	AC	AA	AA	AA	AA
SSL2.50ch01_82019419	C	T	TT	CC	TT	TT	TT	CC	TT	CC	TT	CC	CC	CC	CC	CC	CC	TT	CT	CT	TT	CC	CC	TT	CC	CC	CT	TT	CC	CT	TT	CC	TT	CC	CC	CC	TT	CT	TT	TT	TT	TT	TT	TT	TT	TT	CC	TT	TT
SSL2.50ch01_82067800	G	C	GG	GG	GG	GG	GG	GG	GG	GG	GG	GG	GG	GG	GG	GG	GG	CC	GG	GG	GG	GG	GG	GG	GG	GG	CG	CG	CC	GG	GG	GG	GG	GG	GG	GG	GG	GG	GG	GG	GG	GG	CC	CC	GG	GG	GG	GG	GG
SSL2.50ch01_82077246	G	C	CC	CC	GG	CC	GG	GG	CC	CC	GG	GC	GG	GG	GG	GG	GG	CC	GC	GG	GG	NN	GC	GG	CC	GG	CC	GC	GG	GG	CC	CC	CC	CC	CC	CC	GG	GC	CC	GG	GG	GG	CC	GG	GC	GG	GG	CC	GG
SSL2.50ch01_82077258	T	A	AA	AA	TT	AA	TT	TT	AA	AA	TT	TA	TT	TT	TT	TT	TT	AA	TA	TT	TT	NN	TA	TT	AA	TT	AA	TA	TT	TT	AA	AA	AA	AA	AA	AA	TT	TA	AA	TT	TT	TT	AA	TT	TA	TT	TT	AA	TT
SSL2.50ch01_82077285	G	T	GG	GG	TT	GG	TT	TT	GG	GG	TT	GT	TT	TT	TT	TT	TT	GG	GT	TT	TT	GG	GT	TT	GG	TT	GG	GT	TT	TT	GG	GG	GG	GG	GG	GG	TT	GG	GG	TT	TT	TT	GG	TT	GT	TT	TT	GG	TT
SSL2.50ch01_82077352	A	G	AA	AA	GG	AA	GG	GG	AA	AA	GG	AG	GG	GG	GG	AA	GG	AA	AG	GG	GG	AA	AG	GG	AA	GG	AA	AG	GG	GG	AA	AA	AA	AA	AA	AA	GG	AA	AA	GG	GG	GG	AA	GG	AG	GG	GG	AA	GG
SSL2.50ch01_82077365	A	T	AA	AA	TT	AA	TT	TT	AA	AA	TT	AT	TT	TT	TT	TT	TT	AA	AT	TT	TT	AA	AT	TT	AA	TT	AA	AT	TT	TT	AA	AA	AA	AA	AA	AA	TT	AA	AA	TT	TT	TT	AA	TT	AT	TT	TT	AA	TT
SSL2.50ch01_82088500	T	C	TT	TT	TT	NN	TT	TT	CC	CC	TT	TT	TT	TT	TT	TT	TT	CC	NN	TT	TT	NN	TT	TT	TT	NN	TT	TT	TT	TT	TT	TT	TT	TT	TT	TT	TT	TT	NN	TT	TT	TT	CC	TT	TT	TT	TT	TT	TT
SSL2.50ch01_82090305	A	G	AA	AA	AA	GG	AA	AG	AA	AA	GG	GG	AA	GG	AA	AA	AA	AA	AA	AA	AA	AA	AA	AA	GG	AA	AA	AA	AA	AA	AA	AA	AA	AA	AA	AA	AA	AA	GG	AA	AA	AA	AA	AA	AA	AA	AA	AA	AA
SSL2.50ch01_82098381	T	G	TT	TT	TT	TT	TT	GG	TT	TT	TT	GT	GG	GG	GG	GG	TT	TT	TT	TT	TT	TT	TT	GG	TT	TT	TT	TT	TT	TT	TT	TT	TT	TT	TT	TT	TT	TT	TT	TT	TT	TT	TT	TT	TT	TT	TT	TT	TT
SSL2.50ch01_82103245	A	T	AA	AA	AA	AA	AA	AA	AA	AA	AA	AA	AA	AA	AA	AA	AA	TT	TA	AA	AA	TT	TA	AA	AA	AA	AA	AA	AA	AA	TT	AA	TT	TT	AA	AA	AA	AA	AA	AA	AA	AA	AA	AA	AA	AA	AA	AA	AA
SSL2.50ch01_82103582	C	A	CC	CC	CC	CC	CC	CC	CC	CC	CC	CC	CC	CC	CC	CC	CC	CC	AC	CC	CC	CC	CC	CC	CC	CC	CC	CC	CC	CC	AA	CC	AA	CC	CC	CC	CC	CC	CC	CC	CC	CC	CC	CC	CC	CC	CC	CC	CC
SSL2.50ch01_82103610	C	T	CC	CC	CC	CC	CC	TT	CC	CC	CC	CT	TT	TT	TT	TT	TT	CC	CC	CC	CC	CC	CT	TT	CC	CC	CC	CC	CC	CC	CC	CC	CC	CC	CC	CC	CC	CC	CC	CC	CC	CC	CC	CC	CC	CC	CC	CC	CC
SSL2.50ch01_82117592	G	T	GG	TT	GG	GG	GG	GG	GG	GG	GG	GG	GG	GG	GG	GG	GG	GG	GG	GG	GG	GG	GG	GG	GG	GG	GG	GG	GG	GT	TT	GG	TT	GG	GG	GG	GG	GG	GG	GG	GG	GG	GG	GG	GG	GG	GG	GG	GG
SSL2.50ch01_82128630	T	C	CC	TT	TT	TT	TT	CC	TT	CC	CC	CC	TT	CC	CC	CC	CC	TT	TC	CC	TT	TT	TC	TT	TT	TT	TT	TC	TT	TT	TT	TT	TT	TT	TT	CC	TT	TT	TT	CC	TT	TT	TT	TT	TC	TT	TT	TT	TT
SSL2.50ch01_82128641	G	T	GG	GG	GG	TT	GG	GG	GG	GG	GG	GG	GG	GG	GG	GG	GG	GG	GG	GG	GG	GG	GG	GG	GG	TT	TG	GG	GG	GG	GG	GG	GG	GG	GG	GG	TT	GG	GG	GG	GG	TT	GG	TT	GG	GG	GG	GG	GG
SSL2.50ch01_82128717	A	C	AA	AA	AA	AA	AA	AA	AA	AA	CC	CC	AA	CC	CC	AA	AA	AA	AA	AA	AA	AA	AA	CC	AA	AA	AA	AA	AA	AA	AA	AA	AA	AA	AA	AA	AA	AA	AA	AA	AA	AA	AA	AA	AA	AA	AA	AA	AA
SSL2.50ch01_82138370	A	G	AA	AA	AA	AA	AA	GG	AA	AA	GG	GG	GG	GG	GG	GG	GG	AA	AA	AA	AA	AA	AG	GG	AA	GG	AA	AA	AA	AA	AA	AA	AA	AA	AA	AA	AA	AA	AA	AA	AA	GG	AA	AA	AA	AA	AA	AA	AA
SSL2.50ch01_82192829	C	T	CC	CC	CC	CC	CC	CC	CC	CC	CC	CC	TT	CC	CC	CC	CC	CC	CC	CC	CC	CC	CC	CC	CC	TT	CC	CC	CC	CC	CC	CC	CC	CC	CC	CC	CC	CC	CC	CC	CC	CC	CC	TT	CC	CC	CC	CC	CC
SSL2.50ch01_82216895	A	G	AA	AA	AA	AA	GG	GA	AA	AA	AA	GG	GG	GG	AA	AA	GG	AA	AA	AA	AA	NN	GA	AA	GG	AA	GA	GG	AA	AA	AA	AA	AA	AA	AA	GG	GG	GA	AA	AA	AA	GG	AA	GG	AA	GG	AA	AA	AA
SSL2.50ch01_82221380	C	T	CC	CC	CC	CC	CC	CT	CC	CC	TT	CT	TT	CC	TT	TT	CC	CC	CC	CC	CC	CC	CC	CC	CC	TT	CC	CT	CC	CC	CC	CC	CC	CC	CC	CC	CC	CT	CC	TT	CC	CC	CC	TT	CC	CC	CC	CC	CC
SSL2.50ch01_82227059	T	G	TT	TT	TT	TT	TT	TG	TT	TT	GG	TG	GG	TT	GG	GG	TT	TT	TT	TT	TT	TT	TT	TT	TT	GG	TT	TG	TT	TT	TT	TT	TT	TT	TT	TT	TT	TT	TT	GG	TT	TT	TT	TT	TT	TT	TT	TT	TT
SSL2.50ch01_82229320	G	A	GG	GG	GG	NN	GG	GA	GG	GG	AA	GG	GG	GG	AA	GG	GG	GG	GG	GG	AA	GG	GG	GG	GG	AA	GG	NN	GG	GG	GG	GG	GG	GG	GG	GG	AA	GA	GG	GG	GG	GG	GG	GG	GG	GG	GG	GG	GG
SSL2.50ch01_82229326	T	C	TT	TT	TT	NN	TT	TT	TT	TT	TT	TT	CC	TT	TT	TT	TT	TT	TT	TT	TT	TT	TT	TT	TT	TT	TT	NN	TT	TT	TT	TT	TT	TT	TT	TT	TT	TT	TT	CC	TT	TT	TT	TT	TT	TT	TT	TT	TT
SSL2.50ch01_82229459	T	C	TT	TT	TT	TT	TT	CC	CC	CC	CC	CC	CC	CC	CC	CC	TT	CC	CC	CT	TT	NN	TT	CC	TT	TT	CT	CT	TT	TT	TT	CC	TT	TT	TT	TT	TT	CT	CC	CC	TT	TT	CC	TT	TT	TT	TT	TT	TT
SSL2.50ch01_82261759	A	G	AA	GG	AA	AA	AA	AG	AA	AA	GG	AA	AA	AA	GG	GG	AA	AA	AA	AA	AA	GG	AG	GG	AA	AA	AG	AA	AA	AA	GG	AA	GG	GG	AA	AA	AA	AA	GG	AA	AA	AA	AA	AA	AA	AA	AA	AA	AA
SSL2.50ch01_82286389	C	T	NN	TT	CC	CC	CC	NN	TT	TT	CC	CC	CC	CC	CC	CC	CC	CC	CC	CC	CC	NN	CC	CC	CC	CC	CC	CC	CC	CT	CC	TT	CC	CC	CC	CC	CC	CC	CC	CC	CC	CC	CC	CC	CT	CC	CC	CC	CC
SSL2.50ch01_82286417	G	T	NN	GG	GG	GG	GG	NN	GG	GG	TT	GT	GG	GG	TT	TT	GG	GG	GG	GG	TT	NN	GG	TT	GG	GG	NN	GG	GG	GG	TT	GG	TT	TT	GG	GG	GG	GT	GG	GG	GG	GG	TT	GG	GG	GG	GG	GG	GG
SSL2.50ch01_82288743	T	A	TT	TT	TT	TT	TT	TT	TT	TT	NN	TT	TT	TT	NN	NN	TT	TT	TT	TT	AA	AA	TT	NN	TT	TT	TT	TT	TT	TT	AA	TT	AA	AA	TT	TT	TT	TT	TT	TT	TT	TT	AA	TT	TT	TT	TT	TT	TT
SSL2.50ch01_82288754	C	T	CC	CC	CC	CC	CC	CC	CC	CC	NN	CC	CC	CC	NN	NN	CC	CC	CC	CC	TT	TT	CC	NN	CC	CC	CC	CC	CC	CC	TT	CC	TT	TT	CC	CC	CC	CC	CC	CC	CC	CC	TT	CC	CC	CC	CC	CC	CC
SSL2.50ch01_82291341	A	G	AA	AA	AA	AA	AA	NN	AA	AA	AA	AA	AA	AA	AA	AA	AA	AA	AA	AA	AA	AA	AA	AA	AA	NN	AA	AA	AA	AA	AA	AA	AA	NN	AA	AA	AA	AA	AA	AA	AA	AA	AA	GG	AA	AA	AA	AA	AA
SSL2.50ch01_82291353	C	T	CC	CC	CC	CC	CC	NN	CC	CC	CC	TT	CC	TT	CC	CC	TT	CC	CC	CC	CC	CC	TC	CC	CC	NN	CC	CC	CC	CC	CC	CC	CC	NN	CC	CC	CC	CC	CC	CC	CC	CC	CC	CC	CC	CC	CC	CC	CC
SSL2.50ch01_82305990	T	A	TT	TT	TT	TT	TT	TT	TT	TT	NN	AA	TT	AA	TT	NN	AA	TT	TT	TT	NN	NN	TA	NN	TT	TT	TT	TA	TT	TT	NN	TT	NN	NN	TT	TT	TT	TA	TT	TT	TT	TT	NN	TT	TT	TT	TT	TT	TT
SSL2.50ch01_82311918	C	G	CC	CC	CC	CC	CC	CC	GG	GG	CC	CC	CC	CC	CC	CC	CC	CC	CC	CC	CC	CC	CC	CC	CC	CC	CC	CC	CC	CC	CC	CC	CC	CC	CC	CC	CC	CC	CC	CC	CC	CC	CC	CC	CC	GG	CC	CC	GG
SSL2.50ch01_82315617	C	G	CC	CC	CC	CC	CC	GG	CC	CC	GG	GG	CC	GG	GG	GG	GG	CC	GC	GC	CC	CC	GG	GG	CC	CC	CC	CC	CC	CC	CC	CC	CC	CC	CC	CC	GG	CC	GG	CC	CC	GG	CC	CC	CC	CC	CC	CC	CC
SSL2.50ch01_82374823	G	T	GG	GG	GG	GG	GG	GG	TT	GG	GG	GG	GG	GG	GG	GG	GG	GG	GG	GG	TT	GG	GG	GG	GG	GG	GG	GG	TT	GG	GG	GG	GG	GG	GG	GG	GG	GG	GG	GG	GG	TT	GG	GG	NN	GG	TT	GG	GG
SSL2.50ch01_82403154	C	T	CC	CC	CC	CC	CC	CC	CC	CC	CC	CC	CC	CC	CC	CC	CC	CC	CC	CC	CC	CC	CC	CC	CC	CC	CC	CC	CC	CC	CC	CC	CC	CC	CC	CC	CC	CC	CC	CC	CC	CC	CC	CC	CC	CC	CC	CC	CC
SSL2.50ch01_82423294	G	T	GG	GG	GG	GG	GG	TT	GG	GG	GG	GG	GG	GG	GG	TT	GG	GG	GG	GG	GG	GG	GG	TT	GG	GG	GG	GG	GG	GG	GG	GG	GG	GG	NN	GG	GG	GG	GG	GG	GG	GG	GG	GG	GG	GG	GG	NN	GG
SSL2.50ch01_82423313	A	T	AA	AA	AA	AA	AA	AA	AA	AA	AA	AA	AA	AA	AA	AA	AA	AA	AA	AA	AA	AA	AA	AA	AA	AA	AA	AA	AA	AA	AA	TT	AA	TT	NN	AA	AA	AA	AA	AA	AA	AA	TT	AA	AT	AA	AA	NN	AA
SSL2.50ch01_82423332	T	C	TT	TT	TT	TT	TT	CC	TT	TT	TT	TT	TT	TT	TT	CC	TT	TT	TT	TT	TT	TT	TT	CC	TT	TT	TT	TT	TT	TT	TT	TT	TT	TT	NN	TT	TT	TT	TT	TT	TT	TT	TT	TT	TT	TT	TT	NN	TT
SSL2.50ch01_82428596	G	C	GG	GG	CC	GG	GG	GG	GG	GG	GG	GG	GG	GG	GG	GG	GG	GG	GG	GG	GG	GG	GG	GG	GG	GG	GG	GG	GG	GG	GG	GG	GG	GG	GG	GG	GG	GG	GG	GG	GG	GG	GG	GG	CC	GG	GG	GG	GG
SSL2.50ch01_82428599	C	T	CC	CC	CC	CC	CC	TC	TT	CC	TT	TT	CC	TT	TT	CC	TT	CC	CC	TC	TT	CC	TC	CC	CC	CC	CC	TC	TT	TC	CC	CC	CC	CC	CC	CC	CC	TC	TT	CC	CC	CC	CC	CC	CC	CC	CC	CC	CC
SSL2.50ch01_82428700	C	T	NN	CC	CC	CC	CC	CC	CC	CC	NN	CC	CC	CC	CC	CC	CC	CC	CC	NN	CC	CC	CC	NN	CC	CC	CC	CC	CC	CC	CC	CC	CC	CC	CC	CC	TT	CT	CC	TT	TT	TT	CC	CC	CC	CC	CC	CC	TT
SSL2.50ch01_82428717	T	C	NN	TT	TT	TT	TT	TT	CC	TT	NN	CC	TT	CC	CC	TT	CC	TT	TT	NN	CC	TT	CT	NN	TT	TT	TT	CT	CC	CT	TT	TT	TT	TT	TT	TT	TT	CT	CC	TT	TT	TT	TT	TT	TT	TT	TT	TT	TT
SSL2.50ch01_82430406	C	T	CC	CC	CC	NN	CC	TT	TT	CC	TT	TT	CC	TT	TT	TT	TT	CC	CC	TC	TT	CC	TC	TT	CC	CC	CC	TC	TT	TC	NN	CC	CC	CC	CC	CC	CC	TC	TT	CC	CC	CC	CC	CC	CC	CC	CC	CC	CC
SSL2.50ch01_82431195	A	G	AA	AA	AA	AA	AA	GG	GG	AA	GG	GG	AA	GG	GG	GG	GG	AA	AA	AG	GG	AA	AG	GG	AA	AA	AA	AG	GG	AG	AA	AA	AA	AA	AA	AA	AA	AA	GG	AA	AA	AA	AA	AA	AA	AA	AA	AA	AA
SSL2.50ch01_82431201	G	A	GG	GG	GG	GG	GG	AA	AA	GG	AA	AA	GG	AA	AA	AA	AA	GG	GG	AG	AA	GG	AG	AA	GG	GG	GG	AG	AA	AG	GG	GG	GG	GG	GG	GG	GG	GG	AA	GG	GG	GG	GG	GG	GG	GG	GG	GG	GG
SSL2.50ch01_82431202	T	C	TT	TT	TT	TT	TT	CC	CC	TT	CC	CC	TT	CC	CC	CC	CC	TT	TT	CT	CC	TT	CT	CC	TT	TT	TT	CT	CC	CT	TT	TT	TT	TT	TT	TT	TT	TT	CC	TT	TT	TT	TT	TT	TT	TT	TT	TT	TT
SSL2.50ch01_82440918	A	C	AA	AA	AA	CC	CC	CC	AA	AA	AA	CC	AA	CC	AA	CC	CC	AA	AA	AA	AA	AA	CA	AA	AA	AA	CA	AA	AA	AA	AA	AA	AA	AA	AA	AA	AA	AA	AA	AA	AA	CC	AA	AA	AA	AA	AA	AA	AA
SSL2.50ch01_82442009	C	T	CC	CC	NN	NN	TT	CC	CC	CC	CC	CC	CC	NN	CC	CC	CC	CC	NN	CC	CC	NN	CC	NN	CC	CC	NN	NN	NN	NN	CC	CC	CC	CC	CC	CC	CC	CC	CC	NN	CC	NN	CC	CC	CC	CC	CC	CC	CC
SSL2.50ch01_82476811	A	T	AA	AA	AA	TT	AA	TT	AA	AA	TT	TA	TT	AA	AA	TT	AA	AA	AA	AA	AA	AA	AA	TT	AA	AA	AA	AA	AA	TA	AA	AA	AA	AA	AA	AA	AA	AA	AA	AA	AA	AA	AA	AA	AA	AA	AA	AA	AA
SSL2.50ch01_82477667	A	T	NN	AA	AA	NN	AA	TT	AA	AA	TT	AT	TT	AA	AA	TT	AA	AA	AA	AA	AA	AA	AA	TT	AA	NN	AA	AA	AA	NN	AA	AA	AA	AA	AA	NN	AA	AA	AA	AA	AA	AA	AA	AA	AA	AA	AA	AA	AA
SSL2.50ch01_82477670	T	A	NN	TT	TT	NN	TT	AA	TT	TT	AA	AT	AA	TT	TT	AA	TT	TT	TT	TT	TT	TT	TT	AA	TT	NN	TT	TT	TT	NN	TT	TT	TT	TT	TT	NN	TT	TT	TT	TT	TT	TT	TT	TT	TT	TT	TT	TT	TT
SSL2.50ch01_82477733	C	T	NN	CC	CC	NN	CC	TT	CC	CC	TT	CT	TT	CC	CC	TT	CC	CC	CC	CC	CC	CC	CC	TT	CC	NN	CC	CC	CC	NN	CC	CC	CC	CC	CC	NN	CC	CC	CC	CC	CC	CC	CC	CC	CC	CC	CC	CC	CC
SSL2.50ch01_82477737	T	A	NN	TT	TT	NN	TT	AA	TT	TT	AA	AT	AA	TT	TT	AA	TT	TT	TT	TT	TT	TT	TT	AA	TT	NN	TT	TT	TT	AA	TT	TT	TT	TT	TT	NN	TT	TT	TT	TT	TT	TT	TT	TT	TT	TT	TT	TT	TT
SSL2.50ch01_82483411	G	A	GG	GG	GG	GG	GG	GG	GG	GG	GG	GG	GG	GG	GG	GG	GG	GG	AG	AA	AA	GG	GG	GG	GG	GG	GG	GG	AA	GG	GG	GG	GG	GG	GG	GG	GG	GG	GG	GG	GG	GG	GG	GG	AG	GG	GG	GG	GG
SSL2.50ch01_82509935	C	T	CC	CC	CC	CC	CC	TC	CC	CC	TT	TC	TT	TT	CC	TT	TT	CC	CC	CC	CC	CC	TC	TT	CC	CC	CC	CC	CC	CC	CC	CC	CC	CC	CC	CC	CC	CC	CC	CC	CC	CC	CC	CC	CC	CC	CC	CC	CC
SSL2.50ch01_82511236	C	A	CC	CC	CC	CC	CC	CC	CC	CC	CC	CC	CC	CC	CC	NN	CC	CC	NN	CC	CC	NN	CC	NN	CC	NN	CC	CC	NN	CC	CC	CC	CC	CC	CC	CC	CC	CA	AA	CC	CC	CC	CC	CC	CC	CC	CC	CC	CC
SSL2.50ch01_82582721	A	G	AA	AA	AA	AA	AA	GA	AA	AA	NN	AA	AA	AA	GG	GG	AA	AA	AA	AA	AA	AA	AA	GG	NN	AA	AA	AA	AA	AA	NN	AA	NN	AA	AA	AA	AA	AA	AA	AA	AA	AA	AA	AA	AA	AA	AA	AA	AA
SSL2.50ch01_82582754	T	A	TT	TT	TT	TT	TT	TT	TT	TT	NN	TT	TT	TT	TT	TT	TT	TT	TT	TT	TT	TT	TT	TT	NN	TT	TT	TT	AA	TA	NN	TT	NN	TT	AA	TT	TT	TT	TT	TT	TT	TT	TT	TT	TT	AA	TT	AA	TT
SSL2.50ch01_82582843	A	C	AA	AA	AA	AA	CC	AA	CC	CC	NN	AA	CC	AA	AA	AA	AA	CC	AC	AC	AA	AA	AA	NN	NN	AA	AA	AA	CC	CC	NN	CC	NN	CC	CC	CC	CC	AA	AA	AA	AA	AA	AA	AA	AC	CC	AA	CC	AA
SSL2.50ch01_82586685	C	T	TT	TT	CC	TT	TT	NN	CC	TT	NN	CC	TT	CC	CC	CC	CC	CC	TC	TT	TT	NN	CC	CC	CC	TT	CC	TC	NN	TT	TT	CC	TT	CC	CC	NN	CC	TC	TT	TT	CC	CC	CC	TT	CC	TT	TT	TT	TT
SSL2.50ch01_82592821	G	A	GG	GG	GG	GG	GG	AA	AA	GG	GG	GG	GG	GG	AA	AA	GG	GG	GA	GA	AA	GG	GG	AA	AA	AA	GA	GG	GG	GA	AA	GG	AA	GG	AA	AA	GG	AA	AA	GG	AA	GG	GG	AA	GA	AA	GG	GG	AA
SSL2.50ch01_82599739	A	T	AA	TT	AA	AA	AA	NN	TT	AA	AA	AA	AA	AA	AA	AA	AA	AA	AA	AA	AA	TT	AT	AA	AA	AA	AT	AA	AA	AT	AA	AA	AA	AA	TT	AA	AA	AA	AA	AA	AA	AA	TT	AA	AA	AA	AA	AA	TT
SSL2.50ch01_82603950	C	T	CC	CC	CC	CC	CC	CC	CC	CC	CC	CC	CC	CC	CC	CC	CC	CC	CC	TC	CC	CC	CC	CC	TT	CC	CC	CC	CC	CC	CC	CC	CC	CC	CC	CC	CC	NN	CC	CC	CC	CC	CC	TT	CC	CC	CC	TT	CC
SSL2.50ch01_82605701	T	G	TT	TT	TT	NN	TT	TT	GG	TT	TT	TT	TT	TT	TT	TT	TT	TT	TT	TT	TT	TT	TT	TT	TT	TT	TT	TT	TT	TG	TT	TT	TT	TT	GG	TT	TT	TT	TT	TT	TT	TT	TT	TT	TT	GG	TT	TT	GG
SSL2.50ch01_82605848	A	G	AA	AA	AA	AA	AA	AA	AA	AA	GG	AG	AA	GG	AA	AA	GG	AA	AA	AA	AA	AA	AG	AA	AA	AA	AA	AA	AA	AA	AA	AA	AA	AA	AA	AA	AA	AA	AA	AA	AA	AA	AA	AA	AG	AA	AA	AA	AA
SSL2.50ch01_82616612	C	T	CC	CC	CC	CC	CC	CT	CC	CC	CC	CT	CC	CC	TT	TT	CC	CC	CC	CC	CC	CC	CC	TT	CC	CC	CC	CC	CC	CC	CC	CC	CC	CC	CC	CC	CC	CC	CC	CC	CC	CC	CC	CC	CC	CC	CC	CC	CC
SSL2.50ch01_82616646	T	C	TT	TT	TT	TT	TT	CT	TT	TT	TT	CT	TT	TT	CC	CC	TT	TT	TT	TT	TT	TT	TT	CC	TT	TT	TT	TT	TT	TT	TT	TT	TT	TT	TT	TT	TT	TT	TT	TT	TT	TT	TT	TT	TT	TT	TT	TT	TT
SSL2.50ch01_82632988	T	A	AA	TT	TT	TT	TT	TA	AA	AA	AA	AA	AA	AA	AA	AA	TT	TT	TA	TT	TT	TT	TT	AA	TT	TT	TT	TT	TT	TT	TT	AA	TT	TT	TT	TT	TT	TT	TT	TT	TT	AA	TT	AA	TT	TT	TT	TT	TT
SSL2.50ch01_82655200	C	G	CC	GG	GG	NN	GG	NN	CC	CC	CC	CC	CC	CC	CC	CC	CC	GG	NN	GG	GG	NN	GC	CC	GG	GG	GG	GG	GG	CC	CC	CC	CC	GG	GG	GG	GG	GG	GG	CC	CC	CC	GG	CC	GG	GG	GG	GG	GG
SSL2.50ch01_82662296	T	C	TT	TT	TT	TT	CC	TT	TT	TT	TT	TC	CC	TT	TT	TT	TT	TT	TT	TT	TT	TT	TT	TT	TT	TT	TT	TT	TT	TT	TT	TT	TT	TT	TT	TT	TT	TT	TT	TT	TT	TT	TT	TT	TT	TT	TT	TT	TT
SSL2.50ch01_82662327	A	G	GG	AA	AA	AA	GG	AA	GG	GG	GG	GG	GG	GG	AA	AA	AA	AA	AG	AA	AA	AA	AA	AA	AA	AA	AA	AA	AA	AA	AA	GG	AA	AA	AA	AA	AA	AA	AA	AA	AA	GG	AA	GG	AA	AA	AA	AA	AA
SSL2.50ch01_82662381	T	C	CC	TT	TT	TT	TT	TT	CC	CC	CC	CT	TT	CC	TT	TT	TT	TT	CT	TT	TT	TT	TT	TT	TT	TT	TT	TT	TT	TT	TT	CC	TT	TT	TT	TT	TT	TT	TT	TT	TT	CC	TT	CC	TT	TT	TT	TT	TT
SSL2.50ch01_82669557	T	C	TT	TT	TT	TT	TT	TT	CC	TT	TT	TT	TT	TT	TT	TT	TT	TT	TC	TT	TT	TT	TT	TT	TT	TT	TT	TT	TT	TT	TT	TT	TT	TT	TT	TT	TT	TT	TT	TT	TT	TT	TT	TT	TT	TT	TT	TT	TT
SSL2.50ch01_82675100	C	T	CC	CC	CC	CC	CC	TT	CC	CC	TT	TT	TT	TT	TT	TT	TT	CC	CC	CC	CC	CC	CT	TT	CC	CC	CC	CC	CC	CC	CC	CC	CC	CC	CC	CC	CC	CC	TT	CC	CC	CC	CC	CC	CC	CC	CC	CC	CC
SSL2.50ch01_82759551	A	T	AA	TT	TT	AA	TT	AA	AA	TT	AA	AA	AA	AA	AA	AA	AA	AA	AA	AA	TT	AA	AA	AA	TT	TT	AT	TT	TT	TT	AA	AA	AA	AA	TT	AA	AA	TT	AA	TT	TT	AA	AA	TT	AT	AA	TT	TT	TT
SSL2.50ch01_82773486	C	A	CC	CC	CC	CC	CC	CA	CC	CC	AA	CC	AA	CC	CC	AA	CC	CC	CC	CC	CC	CC	CC	AA	AA	CC	CC	CC	AA	CC	CC	CC	CC	CC	CC	CC	CC	CC	CC	CC	CC	CC	CC	CC	CC	CC	CC	CC	CC
SSL2.50ch01_82773516	C	T	CC	CC	CC	CC	CC	CT	CC	CC	TT	CC	TT	CC	CC	TT	CC	CC	CC	CC	CC	CC	CC	TT	TT	CC	CC	CC	TT	CC	CC	CC	CC	CC	CC	CC	CC	CC	CC	CC	CC	CC	CC	CC	CC	CC	CC	CC	CC
SSL2.50ch01_82773557	A	G	AA	AA	AA	AA	AA	AA	AA	AA	AA	AA	GG	AA	AA	GG	AA	AA	AA	AA	AA	AA	AA	AA	GG	AA	AA	AA	GG	AA	AA	AA	AA	AA	AA	AA	AA	AA	AA	AA	AA	AA	AA	AA	AA	AA	AA	AA	AA
SSL2.50ch01_82777108	C	G	CC	CC	CC	CC	CC	GC	CC	CC	GG	CC	GG	CC	CC	GG	CC	CC	CC	CC	CC	CC	CC	GG	GG	CC	CC	CC	GG	CC	CC	CC	CC	CC	CC	CC	CC	CC	CC	CC	CC	CC	CC	CC	CC	CC	CC	CC	CC
SSL2.50ch01_82777131	A	G	AA	AA	AA	AA	AA	GA	AA	AA	GG	AA	GG	AA	AA	GG	AA	AA	AA	AA	AA	AA	AA	GG	GG	AA	AA	AA	GG	AA	AA	AA	AA	AA	AA	AA	AA	AA	AA	AA	AA	AA	AA	AA	AA	AA	AA	AA	AA
SSL2.50ch01_82777140	G	C	GG	GG	GG	GG	GG	GG	GG	GG	GG	GG	GG	GG	GG	GG	GG	GG	GG	GG	GG	CC	GG	GG	GG	GG	GG	GG	GG	GG	CC	CC	CC	CC	GG	GG	GG	GG	GG	GG	GG	GG	GG	GG	GG	GG	GG	GG	GG
SSL2.50ch01_82777187	G	A	GG	GG	GG	GG	GG	AG	GG	GG	AA	GG	AA	GG	GG	AA	GG	GG	GG	GG	GG	GG	GG	AA	AA	GG	GG	GG	AA	GG	GG	GG	GG	GG	GG	GG	GG	GG	GG	GG	GG	GG	GG	GG	GG	GG	GG	NN	GG
SSL2.50ch01_82777242	T	A	TT	TT	TT	TT	TT	AT	TT	TT	AA	TT	AA	TT	TT	AA	TT	TT	TT	TT	TT	TT	TT	AA	AA	TT	TT	TT	AA	TT	TT	TT	TT	TT	TT	TT	TT	TT	TT	TT	TT	TT	TT	TT	TT	TT	TT	NN	TT
SSL2.50ch01_82780518	T	C	TT	TT	TT	TT	TT	CT	TT	TT	CC	TT	CC	TT	TT	CC	TT	TT	TT	TT	TT	TT	TT	CC	CC	TT	TT	TT	CC	TT	TT	TT	TT	TT	TT	TT	TT	TT	TT	TT	TT	TT	TT	TT	TT	TT	TT	TT	TT
SSL2.50ch01_82780544	G	C	GG	GG	GG	GG	GG	CG	GG	GG	CC	GG	CC	GG	GG	CC	GG	GG	GG	GG	GG	GG	GG	CC	CC	GG	GG	GG	CC	GG	GG	GG	GG	GG	GG	GG	GG	GG	GG	GG	GG	GG	GG	GG	GG	GG	GG	GG	GG
SSL2.50ch01_82780555	G	C	GG	GG	GG	GG	GG	CG	GG	GG	CC	GG	CC	GG	GG	CC	GG	GG	GG	GG	GG	GG	GG	CC	CC	GG	GG	GG	CC	GG	GG	GG	GG	GG	GG	GG	GG	GG	GG	GG	GG	GG	GG	GG	GG	GG	GG	GG	GG
SSL2.50ch01_82797221	G	T	GG	GG	GG	TT	GG	GG	GG	GG	GG	GG	GG	GG	GG	GG	GG	GG	GG	GT	TT	GG	GG	GG	GG	TT	GG	GG	TT	GG	GG	GG	GG	GG	GG	GG	TT	TT	TT	GG	TT	GG	GG	TT	GT	TT	GG	GG	GG
SSL2.50ch01_82797231	G	T	GG	GG	GG	TT	GG	GG	GG	GG	GG	GG	GG	GG	GG	GG	GG	GG	GG	GT	TT	GG	GG	GG	GG	TT	GG	GG	TT	GG	GG	GG	GG	GG	GG	GG	TT	TT	TT	GG	TT	GG	GG	TT	GT	TT	GG	GG	GG
SSL2.50ch01_82835313	G	T	GG	TT	GG	TT	GG	GT	TT	GG	TT	GT	GG	TT	TT	TT	TT	GG	GG	GT	GG	NN	GT	TT	GG	GG	GG	GG	GG	GG	GG	GG	GG	GG	GG	GG	GG	GG	TT	GG	GG	TT	GG	GG	GT	TT	GG	GG	GG
SSL2.50ch01_82872781	A	T	AA	AA	AA	AA	TT	TT	AA	AA	NN	TT	TT	TT	TT	NN	TT	AA	NN	AA	AA	TT	TT	AA	AA	AA	NN	AA	TT	AT	TT	AA	TT	AA	AA	NN	AA	AA	TT	TT	AA	AA	TT	AA	AT	AA	AA	AA	AA
SSL2.50ch01_82877223	A	T	AA	AA	TT	TT	AA	NN	TT	AA	NN	AA	AA	AA	AA	NN	AA	NN	AA	AA	TT	AA	AA	NN	AA	TT	NN	NN	NN	NN	AA	AA	AA	AA	AA	NN	AA	NN	AA	NN	TT	AA	AA	TT	AA	AA	AA	AA	AA
SSL2.50ch01_82919074	A	G	AA	AA	AA	GG	AA	GA	AA	AA	GG	GG	GG	GG	GG	GG	GG	AA	AA	AA	AA	AA	GA	GG	AA	AA	AA	GG	GG	AA	AA	AA	AA	AA	AA	GG	AA	GA	GG	AA	AA	AA	AA	AA	GG	GG	AA	GG	AA
SSL2.50ch01_82923898	A	T	AA	AA	AA	AA	AA	TA	TT	AA	AA	AA	AA	AA	AA	AA	AA	AA	TA	AA	AA	NN	AA	AA	AA	AA	AA	AA	AA	AA	TT	AA	TT	TT	AA	AA	AA	AA	AA	AA	AA	AA	TT	AA	AA	AA	AA	AA	AA
SSL2.50ch01_82923899	A	T	AA	AA	AA	AA	AA	TA	TT	AA	AA	TA	AA	TT	AA	TT	TT	TT	TT	TA	TT	NN	TT	TT	AA	TT	AA	AA	TT	AA	TT	TT	TT	TT	AA	AA	AA	AA	TT	AA	AA	AA	TT	AA	AA	TT	AA	AA	AA
SSL2.50ch01_82923900	T	A	AA	TT	TT	TT	TT	TT	TT	TT	TT	TT	TT	TT	TT	TT	TT	TT	TT	TT	TT	NN	TT	TT	TT	TT	TT	TT	TT	TA	TT	TT	TT	TT	TT	TT	TT	AA	TT	TT	AA	TT	TT	TT	TT	TT	TT	TT	AA
SSL2.50ch01_82924108	T	C	TT	TT	TT	TT	TT	NN	CC	TT	TT	TT	TT	TT	TT	TT	TT	TT	CT	TT	CC	CC	CT	TT	TT	CC	CC	NN	TT	TT	CC	TT	CC	CC	TT	TT	TT	TT	TT	TT	TT	TT	CC	TT	TT	TT	TT	TT	TT
SSL2.50ch01_82982317	C	T	CC	CC	CC	CC	CC	CC	CC	CC	CC	CC	CC	CC	CC	CC	CC	TT	TC	CC	CC	TT	CC	CC	CC	CC	CC	CC	CC	CC	TT	CC	TT	TT	CC	CC	CC	CC	CC	CC	CC	CC	CC	CC	CC	CC	CC	CC	CC
SSL2.50ch01_82982449	G	A	GG	GG	AA	GG	GG	GG	GG	AA	GG	GG	GG	GG	GG	GG	GG	AA	AA	AA	GG	AA	GG	GG	GG	GG	GG	GG	GG	GG	AA	AA	AA	AA	AA	AA	GG	GG	AA	GG	AA	GG	GG	GG	GG	GG	GG	AA	GG
SSL2.50ch01_83052681	T	C	CC	TT	CC	TT	CC	TT	TT	TT	TT	TT	TT	TT	TT	TT	TT	TT	TC	TC	TT	TT	TT	TT	CC	TT	TC	TT	CC	TT	TT	TT	TT	TT	CC	TT	CC	TT	TT	TT	TT	TT	TT	TT	TT	TT	TT	TT	TT
SSL2.50ch01_83057129	G	C	GG	GG	GG	GG	GG	GG	GG	GG	GG	GG	GG	GG	GG	NN	GG	CC	CG	GG	GG	CC	CG	GG	GG	GG	CG	GG	GG	GG	CC	GG	CC	CC	GG	GG	GG	GG	GG	GG	GG	GG	CC	GG	GG	GG	GG	GG	GG
SSL2.50ch01_83068668	C	A	AA	CC	AA	AA	AA	AA	CC	CC	AA	AA	AA	AA	NN	AA	AA	CC	CC	CA	CC	CC	CA	AA	CC	CC	CA	CC	CC	CA	CC	CC	CC	CC	CC	CC	AA	CC	AA	CC	CC	CC	CC	CC	CA	CC	CC	CC	CC
SSL2.50ch01_83068678	A	T	TT	AA	TT	TT	TT	TT	AA	AA	TT	TT	TT	TT	NN	TT	TT	AA	AA	TA	AA	AA	TA	TT	AA	AA	TA	AA	AA	TA	AA	AA	AA	AA	AA	AA	TT	AA	TT	AA	AA	AA	AA	AA	TA	AA	AA	AA	AA
SSL2.50ch01_83068698	T	A	TT	AA	TT	TT	TT	TT	AA	AA	TT	TT	TT	TT	NN	TT	TT	AT	NN	AT	AA	AA	TT	TT	AA	NN	AT	NN	NN	TT	NN	AA	AA	AA	AA	AA	TT	NN	TT	AA	AA	AA	AA	NN	TT	NN	AA	AA	AA
SSL2.50ch01_83068728	G	C	GG	GG	GG	GG	GG	GG	GG	GG	GG	GG	GG	GG	NN	GG	GG	GG	NN	CG	GG	GG	GG	GG	GG	NN	GG	NN	NN	GG	NN	GG	GG	GG	GG	GG	GG	NN	GG	CC	CC	GG	GG	NN	GG	NN	GG	GG	GG
SSL2.50ch01_83116279	A	G	AA	AA	AA	AA	AA	AA	AA	AA	AA	AA	AA	AA	AA	AA	AA	AA	AG	AG	GG	AA	AA	AA	AA	GG	AG	AA	GG	AA	AA	AA	AA	AA	AA	GG	GG	AG	AA	GG	GG	GG	AA	GG	AA	AA	AA	AA	AA
SSL2.50ch01_83152350	C	G	CC	CC	CC	CC	CC	GC	CC	CC	GG	CC	GG	CC	GG	GG	GG	NN	CC	CC	CC	NN	GC	GG	CC	CC	CC	CC	CC	CC	CC	CC	CC	CC	CC	CC	CC	CC	CC	CC	CC	CC	CC	CC	CC	CC	CC	CC	CC
SSL2.50ch01_83152359	G	T	GG	GG	GG	GG	GG	GG	GG	GG	GG	GG	GG	GG	GG	GG	GG	NN	GG	GG	GG	NN	GG	GG	GG	GG	GG	GG	GG	GG	TT	GG	TT	TT	GG	GG	GG	GG	GG	GG	GG	GG	GG	GG	GG	GG	GG	GG	GG
SSL2.50ch01_83155467	G	A	GG	GG	GG	GG	GG	NN	GG	GG	AA	GG	AA	GG	AA	AA	AA	GG	GG	GG	GG	GG	AG	AA	GG	GG	GG	GG	GG	GG	GG	GG	GG	GG	GG	GG	GG	GG	GG	GG	GG	GG	GG	GG	GG	GG	GG	GG	GG
SSL2.50ch01_83238771	A	G	AA	AA	AA	AA	GG	AA	AA	AA	AA	AA	AA	AA	AA	AA	AA	GG	GA	AA	GG	GG	AA	AA	GG	GG	GA	AA	AA	GA	AA	GG	AA	AA	GG	GG	GG	GG	GG	AA	AA	AA	AA	AA	AA	GG	AA	GG	AA
SSL2.50ch01_83239081	A	G	AA	AA	AA	AA	AA	AA	AA	AA	GG	AG	AA	GG	GG	GG	GG	AA	AG	GG	AA	AA	GG	GG	AA	AA	AG	AA	AA	AA	AA	AA	AA	GG	AA	AA	AA	AA	AA	AA	AA	AA	GG	AA	GG	AA	AA	AA	GG
SSL2.50ch01_83244763	A	C	AA	AA	AA	AA	AA	AA	CC	AA	AA	AA	AA	AA	AA	AA	AA	AA	CA	CC	CC	AA	CA	AA	CC	CC	CA	AA	AA	CA	AA	CC	AA	AA	AA	AA	CC	CC	CC	CC	AA	CC	CC	CC	CA	AA	AA	AA	CC
SSL2.50ch01_83288530	C	G	CC	CC	GG	CC	CC	GG	CC	CC	CC	CC	GG	CC	GG	GG	CG	CC	CG	CG	CC	CC	GG	GG	GG	CC	CG	CC	GG	CG	GG	CC	GG	GG	CC	GG	CC	CG	CC	CC	CC	GG	GG	GG	CG	CC	CC	CC	CC
SSL2.50ch01_83378106	C	G	GG	CC	GG	GG	GG	GG	GG	CC	CC	CC	CC	CC	CC	GG	CG	CC	CG	GG	GG	CC	CG	GG	GG	GG	CC	GG	GG	CC	CC	CC	CC	CC	GG	GG	CC	CG	GG	CC	CC	GG	CC	GG	GG	GG	CC	CC	CC
SSL2.50ch01_83385908	T	G	GG	GG	TT	GG	GG	TT	GG	GG	TT	TT	TT	TT	TT	TT	TG	GG	TT	TT	TT	GG	TG	TT	GG	TT	TG	TT	NN	GG	GG	GG	GG	GG	GG	TT	TT	TT	TT	TT	TT	TT	GG	TT	TT	TT	GG	GG	GG
SSL2.50ch01_83385945	C	T	CC	CC	CC	CC	CC	CC	CC	CC	CC	CC	TC	CC	CC	CC	CC	CC	CC	CC	CC	CC	CC	CC	CC	CC	CC	CC	NN	CC	CC	CC	CC	CC	CC	CC	CC	CC	CC	CC	CC	CC	CC	CC	CC	CC	CC	CC	CC
SSL2.50ch01_83405145	T	G	TT	NN	NN	TG	TT	TT	GG	GG	GG	TT	TT	TT	TT	TT	TT	GG	TG	TT	GG	GG	TG	TT	TT	GG	TG	TT	NN	TG	TG	GG	GG	TT	TT	TT	GG	TG	TT	TT	GG	TT	TT	TT	TT	TT	TT	TT	TT
SSL2.50ch01_83408935	G	A	GG	GG	GG	GG	GG	GG	AA	AA	NN	GG	GG	GG	GG	GG	GG	AA	GA	GG	AA	AA	GA	GG	GG	AA	GA	GG	GG	GA	AA	AA	AA	GG	GG	GG	AA	GA	GG	GG	AA	GG	GG	GG	GG	GG	GG	GG	GG
SSL2.50ch01_83425473	A	G	AA	AA	AA	AA	AA	GA	AA	AA	AA	AA	GG	AA	AA	AA	AA	AA	AA	AA	AA	AA	AA	AA	AA	AA	AA	AA	AA	AA	AA	AA	AA	AA	AA	AA	AA	AA	AA	AA	AA	AA	AA	AA	AA	AA	AA	AA	AA
SSL2.50ch01_83447232	T	C	TT	TT	CC	TT	TT	TT	CC	CC	TT	TT	TT	TT	TT	TT	TT	TT	TT	TT	TT	CC	TC	TT	CC	TT	TC	CC	TT	TC	TT	CC	TT	TT	TT	TT	TT	TT	TT	TT	CC	TT	TT	TT	TT	TT	TT	CC	TT
SSL2.50ch01_83450976	C	G	GG	CC	CC	NN	CC	GG	CC	CC	CC	GC	GG	CC	GG	GG	CC	CC	GG	GG	GG	CC	GC	GG	CC	GC	NN	CC	GG	GC	CC	CC	CC	CC	GG	GG	GG	GG	GG	CC	CC	GG	CC	GG	GG	CC	CC	CC	CC
SSL2.50ch01_83483925	C	T	CC	CC	CC	CC	CC	CT	CC	CC	CC	TT	CC	TT	TT	TT	CT	CC	CT	CC	CC	CC	CT	TT	CC	CC	CC	CC	CC	CC	CC	CC	CC	CC	CC	CC	CC	CC	CC	NN	CC	CC	CC	NN	CC	CC	CC	CC	CC
SSL2.50ch01_83488841	G	T	GG	GG	GG	GG	GG	NN	GG	GG	NN	TT	GG	TT	TT	TT	GT	GG	GT	GG	GG	GG	TT	TT	GG	GG	GG	GG	GG	GG	GG	GG	GG	GG	GG	GG	GG	GG	GG	GG	GG	GG	GG	GG	GG	GG	GG	GG	GG
SSL2.50ch01_83493463	G	A	GG	GG	GG	GG	GG	GA	GG	GG	NN	AA	GG	AA	AA	AA	GA	GG	GG	GG	GG	GG	GA	AA	GG	GG	GG	GG	GG	GG	GG	GG	GG	GG	GG	GG	GG	GG	GG	GG	GG	GG	GG	GG	GG	GG	GG	GG	GG
SSL2.50ch01_83497418	T	C	TT	TT	TT	TT	TT	TC	TT	TT	TT	CC	TT	CC	CC	CC	TC	TT	TC	TT	TT	TT	TC	CC	TT	TT	TT	TT	TT	TT	TT	TT	TT	TT	TT	TT	TT	TT	TT	TT	TT	TT	TT	TT	TT	TT	TT	TT	TT
SSL2.50ch01_83497488	T	C	TT	TT	TT	TT	TT	TT	TT	TT	TT	TT	TT	TT	TT	TT	CT	CC	TT	TT	TT	NN	CT	TT	TT	TT	CT	TT	TT	TT	CC	TT	CC	CC	TT	TT	TT	TT	TT	TT	TT	TT	CC	TT	TT	TT	TT	TT	TT
SSL2.50ch01_83500275	T	A	TT	TT	TT	NN	TT	TA	TT	TT	TT	AA	TT	AA	AA	AA	AA	TT	TA	TT	TT	NN	TA	AA	TT	TT	TT	TT	TT	TT	TT	TT	TT	TT	TT	TT	TT	TT	TT	TT	TT	TT	TT	TT	TT	TT	TT	TT	TT
SSL2.50ch01_83500325	C	T	TT	TT	CC	CC	CC	CC	CC	CC	CC	CC	CC	CC	CC	CC	CC	CC	CC	CC	TT	CC	CC	CC	CC	TT	CC	CC	CC	CC	CC	CC	CC	CC	CC	TT	CC	CT	CC	CC	CC	CC	CC	TT	CC	TT	TT	CC	TT
SSL2.50ch01_83512920	G	A	GG	GG	GG	GG	GG	GG	GG	GG	GG	GG	GG	GG	GG	GG	GG	GG	GG	GG	GG	GG	GG	GG	AA	GG	GG	GG	GG	GG	GG	GG	GG	GG	GG	GG	GG	GG	GG	GG	GG	GG	GG	GG	GG	GG	GG	AA	GG
SSL2.50ch01_83546208	A	T	AA	AA	AA	AA	AA	TT	AA	AA	AA	TT	AA	TT	TT	TT	AT	AA	AA	AA	AA	AA	AT	TT	AA	AA	AA	AA	AA	AA	AA	AA	AA	AA	AA	AA	AA	AA	AA	AA	AA	AA	AA	AA	AA	AA	AA	AA	AA
SSL2.50ch01_83614977	G	A	GG	GG	GG	AA	GG	GG	GG	GG	GG	GG	GG	GG	GG	GG	GG	GG	GG	GG	GG	GG	AG	GG	GG	GG	AA	GG	GG	AG	GG	GG	GG	GG	GG	GG	GG	GG	AA	GG	GG	GG	GG	GG	GG	GG	GG	GG	GG
SSL2.50ch01_83615001	A	G	AA	AA	AA	AA	GG	GG	AA	AA	GG	AG	GG	GG	AA	GG	AG	AA	AA	AA	AA	AA	AG	AA	AA	AA	AA	AA	AA	AA	AA	AA	AA	AA	AA	AA	AA	AA	AA	AA	AA	AA	AA	AA	AA	AA	AA	AA	AA
SSL2.50ch01_83644589	T	C	TT	TT	TT	TT	TT	CT	TT	TT	NN	TT	TT	CC	CC	CC	CT	TT	TT	TT	TT	TT	CT	TT	TT	TT	TT	TT	TT	TT	TT	TT	TT	TT	TT	TT	TT	TT	TT	TT	TT	TT	TT	TT	TT	TT	TT	TT	TT
SSL2.50ch01_83644593	C	T	CC	CC	CC	CC	CC	TT	CC	CC	NN	CC	CC	CC	TT	TT	CT	CC	CC	CC	CC	CC	CT	TT	CC	CC	CC	CC	CC	CC	CC	CC	CC	CC	CC	CC	CC	CC	CC	CC	CC	CC	CC	CC	CC	CC	CC	CC	CC
SSL2.50ch01_83644634	A	G	AA	AA	AA	AA	AA	AG	AA	AA	NN	AA	AA	AA	AA	GG	AG	AA	AA	AA	AA	AA	AG	AA	AA	AA	AA	AA	AA	AA	AA	AA	AA	AA	AA	AA	AA	AA	AA	AA	AA	AA	AA	AA	AA	AA	AA	AA	AA
SSL2.50ch01_83644635	A	C	AA	AA	AA	AA	AA	AC	AA	AA	NN	AA	AA	AA	CC	CC	AC	AA	AA	AA	AA	AA	AC	AA	AA	AA	AA	AA	AA	AA	AA	AA	AA	AA	AA	AA	AA	AA	AA	AA	AA	AA	AA	AA	AA	AA	AA	AA	AA
SSL2.50ch01_83650968	G	A	GG	AA	GG	GG	GG	GG	AA	GG	NN	GG	GG	GG	GG	GG	GA	AA	GG	GG	AA	AA	GA	GG	AA	AA	GA	GG	GG	GA	AA	GG	AA	AA	GG	GG	GG	GA	GG	AA	AA	GG	GG	GG	GG	GG	GG	GG	GG
SSL2.50ch01_83710701	G	A	AA	GG	GG	GG	GG	GG	GG	GG	GG	GG	GG	GG	GG	GG	GG	GG	GA	GA	GG	GG	GG	GG	GG	GG	GG	GG	GG	GG	GG	NN	GG	GG	AA	GG	GG	GA	GG	GG	GG	GG	GG	AA	GA	AA	GG	NN	GG
SSL2.50ch01_83710729	A	T	AA	AA	AA	AA	AA	NN	AA	AA	NN	TT	TT	TT	TT	TT	AA	AA	NN	AA	AA	AA	AT	NN	AA	AA	NN	AA	AA	NN	AA	NN	AA	AA	NN	AA	AA	AA	AA	AA	AA	AA	AA	AA	AA	AA	AA	NN	AA
SSL2.50ch01_83711666	T	C	TT	TT	NN	TT	TT	TC	TT	TT	CC	CC	CC	CC	CC	CC	TC	TT	TT	TT	TT	TT	TC	NN	TT	TT	TT	TT	TT	TT	NN	NN	TT	TT	TT	TT	TT	TT	TT	TT	TT	TT	TT	TT	TT	TT	TT	TT	TT
SSL2.50ch01_83727652	C	T	TC	TC	CC	TC	TC	TC	TC	TC	TC	TC	TC	TC	TC	TC	TC	TC	CC	TC	TC	TC	TC	TC	TC	TC	CC	TC	TC	TC	TC	TC	TC	TC	NN	CC	TC	TC	TC	TC	NN	TC	NN	CC	TC	CC	CC	CC	TC
SSL2.50ch01_83727659	A	G	GA	GA	AA	GA	GA	GA	GA	GA	GA	GA	GA	GA	GA	GA	GA	GA	AA	GA	GA	GA	GA	GA	GA	GA	AA	GA	GA	GA	GA	GA	GA	GA	NN	AA	GA	GA	GA	GA	NN	GA	NN	AA	GA	AA	AA	AA	GA
SSL2.50ch01_83727664	T	C	TC	TC	TT	TC	TC	TC	TC	TC	TC	TC	TC	TC	TC	TC	TC	TC	TT	TC	TC	TC	TC	TC	TC	TC	TT	TC	TC	TC	TC	TC	TC	TC	NN	TT	TC	TC	TC	TC	NN	TC	NN	TT	TC	TT	TT	TT	TC
SSL2.50ch01_83727667	T	C	TC	TC	TT	TC	TC	TC	TC	TC	TC	TC	TC	TC	TC	TC	TC	TC	TT	TC	TC	TC	TC	TC	TC	TC	TT	TC	TC	TC	TC	TC	TC	TC	NN	TT	TC	TC	TC	TC	NN	TC	NN	TT	TC	TT	TT	TT	TC
SSL2.50ch01_83727668	G	T	TG	TG	GG	TG	TG	TG	TG	TG	TG	TG	TG	TG	TG	TG	TG	TG	GG	TG	TG	TG	TG	TG	TG	TG	GG	TG	TG	TG	TG	TG	TG	TG	NN	GG	TG	TG	TG	TG	NN	TG	NN	GG	TG	GG	GG	GG	TG
SSL2.50ch01_83727681	T	C	TC	TC	TT	TC	TC	TC	TC	TC	TC	TC	TC	TC	TC	TC	TC	TC	TT	TC	TC	TC	TC	TC	TC	TC	TT	TC	TC	TC	TC	TC	TC	TC	NN	TT	TC	TC	TC	TC	NN	TC	NN	TT	TC	TT	TT	TT	TC
SSL2.50ch01_83727695	T	G	TG	TG	TT	TG	TG	TG	TG	TG	TG	TG	TG	TG	TG	TG	TG	TG	TT	TG	TG	TG	TG	TG	TG	TG	TT	TG	TG	TG	TG	TG	TG	TG	NN	TT	TG	TG	TG	TG	NN	TG	NN	TT	TG	TT	TT	TT	TG
SSL2.50ch01_83730685	T	A	NN	TT	NN	AA	AA	TA	TT	TT	NN	AA	TT	NN	TT	AA	TA	TT	TT	NN	TT	TT	TA	AA	NN	TT	TT	AA	NN	TT	TT	TT	TT	TT	TT	NN	TT	TT	NN	TT	NN	TT	TT	TT	TT	NN	TT	AA	AA
SSL2.50ch01_83741175	C	T	CC	CC	CC	CC	CC	CT	CC	CC	CC	CC	CC	NN	NN	CC	CC	CC	CC	CC	TT	CC	CC	CC	CC	TT	CC	CC	CC	CC	CC	CC	CC	CC	CC	CC	CC	CC	CC	CC	CC	CC	CC	CC	CC	CC	CC	CC	CC
SSL2.50ch01_83756259	T	A	TA	TT	TT	TA	TA	TT	TT	TA	TA	TA	TA	TT	TA	TA	TA	TA	TA	TT	TT	TA	TA	TA	TT	TA	NN	TT	TT	TT	TA	TA	TA	TA	NN	NN	TT	TT	TT	TT	TT	TT	TT	TT	TA	TT	TT	TT	TT
SSL2.50ch01_83789018	G	T	GG	TT	GG	GG	GG	GG	TT	TT	GG	GG	GG	GG	GG	GG	GG	GG	GG	GG	GG	GG	GG	GG	GG	GG	GG	GG	GG	GG	GG	GG	GG	GG	GG	GG	GG	GG	GG	GG	GG	GG	GG	GG	GG	GG	GG	GG	GG
SSL2.50ch01_83817639	T	A	TT	TT	TT	TT	AA	AA	TT	TT	NN	AA	AA	AA	AA	AA	TA	TT	TT	TT	TT	TT	TA	AA	TT	TT	TT	TT	TT	TA	TT	TT	TT	TT	TT	TT	TT	TT	TT	TT	TT	TT	TT	TT	TT	TT	TT	TT	TT
SSL2.50ch01_83838016	G	T	GG	GG	GG	GG	TT	TT	GG	GG	TT	TT	TT	TT	TT	TT	GT	GG	GG	GG	GG	GG	GT	TT	TT	GG	GG	GG	GG	GG	GG	GG	GG	GG	GG	GG	GG	GG	GG	GG	GG	GG	GG	GG	GG	GG	GG	GG	GG
SSL2.50ch01_83855680	C	A	CC	CC	CC	CC	AA	AA	CC	CC	AA	AA	AA	AA	AA	AA	CA	CC	CC	CC	CC	CC	CA	AA	AA	CC	CC	CC	CC	CC	CC	CC	CC	CC	CC	CC	CC	CC	CC	CC	CC	CC	CC	CC	CC	CC	CC	CC	CC
SSL2.50ch01_83855742	T	A	TT	TT	TT	TT	AA	AA	TT	TT	AA	AA	AA	AA	AA	AA	TA	TT	TT	TT	TT	TT	TA	AA	AA	TT	TT	TT	TT	TT	TT	TT	TT	TT	TT	TT	TT	TT	TT	TT	TT	TT	TT	TT	TT	TT	TT	TT	TT
SSL2.50ch01_83855746	T	C	TT	TT	TT	TT	CC	CC	TT	TT	CC	CC	CC	CC	CC	CC	TC	TT	TT	TT	TT	TT	TC	CC	CC	TT	TT	TT	TT	TT	TT	TT	TT	TT	TT	TT	TT	TT	TT	TT	TT	TT	TT	TT	TT	TT	TT	TT	TT
SSL2.50ch01_83855768	G	T	GG	GG	GG	NN	TT	TT	GG	GG	TT	TT	TT	TT	TT	TT	GT	GG	GG	GG	GG	GG	GG	NN	TT	GG	GG	GG	GG	GG	GG	GG	GG	GG	GG	GG	GG	GG	GG	GG	GG	GG	GG	GG	GG	GG	GG	GG	GG
SSL2.50ch01_83855777	G	T	GG	GG	GG	NN	TT	TT	GG	GG	TT	TT	TT	TT	TT	TT	GT	GG	GG	GG	GG	GG	GG	NN	TT	GG	GG	GG	GG	GG	GG	GG	GG	GG	GG	GG	GG	GG	GG	GG	GG	GG	GG	GG	GG	GG	GG	GG	GG
SSL2.50ch01_83855791	G	T	GG	GG	GG	NN	TT	TT	GG	GG	TT	TT	TT	TT	TT	TT	GT	GG	GG	GG	GG	GG	GG	NN	TT	GG	GG	GG	GG	GG	GG	GG	GG	GG	GG	GG	GG	GG	GG	GG	GG	GG	GG	GG	GG	GG	GG	GG	GG
SSL2.50ch01_83855802	C	A	CC	CC	CC	NN	AA	AA	CC	CC	AA	AA	AA	AA	AA	AA	AC	CC	CC	CC	CC	CC	CC	NN	AA	CC	CC	CC	CC	CC	CC	CC	CC	CC	CC	CC	CC	CC	CC	CC	CC	CC	CC	CC	CC	CC	CC	CC	CC
SSL2.50ch01_83858963	T	C	TT	TT	TT	TT	TT	TC	TT	TT	CC	TT	TT	TT	TT	CC	TC	TT	TT	TT	TT	TT	TC	CC	TT	TT	TT	TT	TT	TT	TT	TT	TT	TT	TT	NN	TT	TT	TT	TT	TT	TT	TT	TT	TT	TT	TT	TT	TT
SSL2.50ch01_83862017	T	C	CC	TT	TT	TT	TT	TC	TT	TT	CC	TC	TT	TT	CC	TT	TT	CC	TT	TT	TT	CC	TC	TT	CC	TT	TC	CC	TT	TC	TT	TT	TT	CC	CC	TT	TT	TT	CC	TT	TT	TT	CC	CC	TC	CC	TT	CC	TT
SSL2.50ch01_83862108	G	A	GG	GG	GG	GG	GG	AG	GG	GG	AA	AG	GG	GG	AA	GG	GG	GG	GG	GG	GG	GG	GG	GG	GG	GG	GG	AA	GG	AG	GG	GG	GG	GG	AA	GG	GG	GG	GG	GG	GG	GG	GG	GG	GG	AA	GG	GG	GG
SSL2.50ch01_83868756	T	C	TT	TT	TT	TT	TT	TC	TT	TT	NN	TT	TT	TT	TT	CC	TC	TT	TT	TT	TT	TT	TC	CC	NN	TT	TT	NN	TT	TT	TT	TT	TT	TT	TT	TT	TT	TT	TT	TT	TT	TT	TT	TT	TT	TT	TT	TT	TT
SSL2.50ch01_83886378	G	A	GG	GG	GG	GG	AG	GG	GG	GG	NN	GG	NN	GG	GG	NN	GG	AA	GG	GG	GG	GG	GG	GG	GG	NN	GG	GG	GG	GG	GG	GG	GG	GG	GG	NN	GG	GG	GG	GG	GG	GG	AA	GG	GG	GG	GG	GG	AA
SSL2.50ch01_83892299	T	A	TT	TT	TT	NN	TT	AT	TT	TT	NN	TT	TT	TT	TT	AA	AT	TT	TT	TT	TT	TT	AT	AA	TT	TT	NN	NN	NN	TT	TT	TT	TT	TT	TT	TT	TT	TT	TT	TT	TT	TT	TT	TT	TT	TT	TT	TT	TT
SSL2.50ch01_83892336	T	C	TT	TT	TT	NN	TT	CT	TT	TT	NN	TT	TT	TT	TT	CC	CT	TT	TT	TT	TT	TT	CT	CC	TT	TT	NN	NN	NN	TT	TT	TT	TT	TT	TT	TT	TT	TT	TT	TT	TT	TT	TT	TT	TT	TT	TT	TT	TT
SSL2.50ch01_83964094	T	A	TT	TT	NN	TT	TT	NN	TT	TT	AA	AA	AA	AA	AA	NN	NN	TT	TT	TT	TT	TT	TA	AA	NN	NN	TT	TT	TT	TT	NN	TT	TT	TT	TT	TT	TT	NN	TT	TT	TT	TT	TT	TT	NN	TT	TT	TT	TT
SSL2.50ch01_83964147	C	T	CC	CC	CC	CC	CC	CC	CC	CC	CC	CC	CC	CC	CC	CC	CC	CC	CC	CC	CC	TT	CC	CC	CC	CC	CC	CC	CC	CC	CC	CC	CC	TT	CC	CC	CC	CC	CC	CC	CC	CC	CC	CC	CC	CC	CC	CC	CC
SSL2.50ch01_83964217	C	G	CC	CC	GG	CC	CC	CC	CC	CC	CC	CC	CC	CC	CC	CC	CC	CC	CC	CC	CC	GG	CC	CC	CC	CC	CG	CC	CC	CC	CC	CC	CC	GG	CC	CC	CC	CG	GG	CC	GG	CC	CC	CC	CC	CC	CC	CC	GG
SSL2.50ch01_84081473	T	C	TT	TT	TT	TT	TT	TT	CC	CC	TT	TT	TT	TT	TT	TT	TT	TT	TT	TT	TT	NN	TT	TT	TT	TT	TT	TT	CC	TT	TT	TT	TT	TT	TT	TT	TT	CC	TT	CC	CC	CC	TT	CC	TT	TT	TT	CC	CC
SSL2.50ch01_84084032	G	A	GG	GG	GG	GG	GG	NN	GG	GG	GG	GG	GG	GG	GG	GG	GG	GG	GG	GG	GG	GG	GG	GG	AA	GG	GG	GG	GG	GA	GG	GG	GG	GG	GG	AA	GG	GG	GG	GG	GG	GG	GG	GG	GG	GG	AA	GG	GG
SSL2.50ch01_84086464	C	T	CC	TT	TT	CC	CC	CC	CC	CC	CC	CC	CC	CC	CC	CC	TC	TT	NN	CC	TT	TT	CC	TT	TT	NN	TT	TT	CC	TT	TT	TT	TT	TT	CC	TT	TT	CC	CC	CC	CC	CC	TT	CC	TC	TT	TT	CC	CC
SSL2.50ch01_84086551	T	C	CC	TT	TT	CC	CC	CT	CC	CC	TT	CC	CC	CC	TT	TT	TT	TT	CC	CC	TT	NN	CT	TT	TT	NN	CT	TT	CC	TT	TT	TT	TT	TT	CC	TT	TT	CC	CC	CC	CC	CC	TT	CC	CC	TT	TT	CC	CC
SSL2.50ch01_84088714	T	C	TT	TT	TT	TT	TT	TT	TT	TT	TT	TT	TT	TT	TT	TT	TT	TT	TT	TT	TT	TT	TT	TT	TT	TT	TT	TT	TT	TT	TT	TT	TT	TT	TT	TT	TT	TC	CC	CC	TT	TT	TT	TT	TT	TT	TT	TT	TT
SSL2.50ch01_84122592	C	A	CC	CC	CC	CC	NN	CA	CC	CC	CC	CC	CC	CC	CC	AA	CA	CC	CC	CC	CC	CC	CA	CA	CC	CC	CC	CC	CC	CC	CC	CC	CC	CC	CC	CC	CC	CC	CC	CC	NN	CC	CC	CC	CC	CC	CC	CC	CC
SSL2.50ch01_84125467	G	A	GG	GG	GG	GG	GG	AG	GG	GG	AA	AG	GG	AA	AA	GG	GG	GG	GG	GG	GG	GG	GG	GG	GG	GG	GG	GG	AA	GG	GG	GG	GG	GG	GG	GG	AA	AG	AA	AA	GG	GG	GG	GG	GG	GG	GG	GG	GG
SSL2.50ch01_84129332	T	A	TT	TT	TT	AA	TT	TT	TT	NN	TT	TT	TT	TT	NN	NN	TT	TT	TT	TT	TT	TT	TT	TT	NN	TT	TT	TT	TT	TT	TT	TT	TT	TT	TT	TT	TT	TT	TT	TT	TT	TT	TT	TT	TT	TT	TT	TT	TT
SSL2.50ch01_84180462	A	C	AA	CC	AA	AA	AA	AA	CC	AA	AA	AA	AA	AA	AA	AA	AA	CC	AA	AA	AA	CC	AA	AA	AA	AA	AA	AA	AA	AA	AA	AA	AA	AA	AA	AA	AA	CA	AA	AA	AA	AA	AA	CC	AA	AA	AA	AA	AA
SSL2.50ch01_84195990	A	C	AA	AA	AA	AA	AA	AA	AA	AA	AA	AA	AA	AA	AA	AA	AA	CC	AA	AA	CC	AA	AA	AA	AA	CC	AA	AA	CC	AA	AA	CC	AA	AA	AA	AA	CC	CA	AA	CC	AA	AA	CC	CC	AA	AA	AA	AA	AA
SSL2.50ch01_84196019	A	G	AA	GG	AA	AA	AA	NN	GG	GG	AA	AG	AA	GG	AA	NN	GG	AA	AA	AA	AA	AA	AG	AA	AA	NN	AA	AA	AA	NN	AA	AA	AA	AA	AA	NN	AA	AA	AA	AA	AA	AA	AA	AA	AA	AA	AA	AA	AA
SSL2.50ch01_84198013	A	T	AA	AA	AA	NN	AA	AA	AA	AA	NN	AA	AA	AA	AA	AA	AA	AA	AA	AA	AA	AA	AA	AA	AA	AA	NN	AA	AA	AA	AA	AA	AA	TT	AA	AA	AA	AA	AA	AA	AA	AA	AA	AA	AA	AA	AA	AA	AA
SSL2.50ch01_84205958	C	T	CC	CC	CC	TT	CC	CC	CC	CC	CC	TC	CC	TT	CC	CC	CC	CC	CC	CC	CC	CC	CC	CC	CC	CC	CC	CC	CC	TC	CC	CC	CC	CC	CC	CC	CC	CC	CC	CC	CC	TT	CC	CC	CC	CC	CC	CC	CC
SSL2.50ch01_84209925	A	G	AA	AA	NN	AA	AA	GA	AA	AA	GG	AA	AA	AA	GG	AA	GA	AA	AA	AA	AA	AA	GA	GA	AA	AA	AA	AA	AA	AA	NN	AA	AA	AA	AA	AA	AA	AA	AA	AA	AA	AA	AA	AA	AA	AA	AA	AA	AA
SSL2.50ch01_84228957	G	A	AA	AA	GG	GG	GG	GG	GG	AA	GG	GG	GG	GG	GG	GG	NN	AA	AA	GA	GG	AA	GA	GA	GG	GG	GA	AA	GG	GG	AA	GG	AA	AA	GG	AA	GG	GG	GG	GG	GG	GG	GG	GG	GA	AA	GG	AA	GG
SSL2.50ch01_84290036	G	A	GG	GG	GG	GG	GG	GG	GG	GG	GG	GG	GG	GG	GG	GG	GG	GG	GG	GG	GG	GG	GG	GG	GG	GG	GG	GG	GG	GG	GG	GG	GG	GG	GG	GG	GG	GG	GG	GG	GG	GG	GG	GG	GG	GG	GG	GG	GG
SSL2.50ch01_84294644	C	T	CC	CC	CC	CC	CC	TC	CC	CC	CC	CC	CC	CC	CC	TT	TC	CC	CC	CC	CC	CC	TC	TC	CC	CC	CC	CC	CC	CC	CC	CC	CC	CC	CC	CC	CC	CC	CC	CC	CC	CC	CC	CC	CC	CC	CC	CC	CC
SSL2.50ch01_84320199	T	A	TT	TT	TT	TT	TT	TT	TT	TT	TT	TT	AA	TT	TT	TT	TT	TT	TT	TA	TT	TT	TT	TT	TT	TT	TT	TT	TT	TT	TT	TT	TT	TT	TT	TT	TT	TT	AA	TT	TT	TT	TT	AA	TT	TT	TT	TT	TT
SSL2.50ch01_84320283	G	A	GG	GG	GG	GG	GG	GG	GG	GG	GG	GG	AA	GG	GG	GG	GG	GG	GG	GA	GG	GG	GG	GG	GG	GG	GG	GG	GG	GG	GG	GG	GG	GG	GG	GG	GG	GG	AA	GG	GG	GG	GG	AA	GG	GG	GG	GG	GG
SSL2.50ch01_84326842	T	C	CC	TT	CC	TT	TT	TT	TT	TT	TT	TT	TT	TT	TT	TT	TT	TT	TT	TT	TT	TT	TT	NN	TT	TT	TT	TT	TT	TT	TT	TT	TT	TT	TT	TT	TT	TT	TT	TT	TT	TT	TT	TT	TT	TT	TT	TT	TT
SSL2.50ch01_84326848	A	T	AA	TT	AA	AA	AA	AA	TT	TT	AA	AA	AA	AA	AA	AA	AA	TT	AA	AA	TT	TT	AT	NN	AA	TT	NN	TT	TT	AA	TT	TT	TT	TT	TT	AA	AA	AA	AA	AA	AA	TT	TT	AA	AT	AA	AA	TT	TT
SSL2.50ch01_84328704	T	C	CC	TT	CC	TT	TT	TT	TT	TT	TT	TT	TT	TT	TT	TT	TT	TT	TT	CC	TT	TT	TT	TT	TT	TT	TC	TT	TT	TC	TT	TT	TT	TT	TT	TT	TT	TC	CC	TT	CC	TT	TT	CC	TC	TT	TT	TT	TT
SSL2.50ch01_84328798	C	T	CC	CC	CC	TT	CC	CC	CC	CC	NN	CT	TT	CC	CC	CC	CC	CC	CC	CC	CC	CC	CC	CC	CC	CC	CC	CC	CC	CC	CC	CC	CC	CC	CC	TT	CC	CC	CC	TT	CC	CC	CC	CC	CC	CC	CC	CC	CC
SSL2.50ch01_84332059	C	T	TT	CC	TT	CC	CC	CC	CC	CC	CC	CC	CC	CC	CC	CC	CC	CC	CC	TT	CC	CC	CC	CC	CC	CC	CT	CC	CC	TT	CC	CC	CC	CC	CC	CC	CC	CC	TT	CC	TT	CC	CC	TT	CT	CC	CC	CC	CC
SSL2.50ch01_84335648	C	T	CC	TT	CC	CC	CC	CC	TT	TT	CC	CC	CC	CC	CC	CC	CC	CC	CC	CC	TT	CC	CC	CC	CC	TT	CC	CC	CC	CC	CC	TT	CC	CC	CC	CC	CC	CC	CC	CC	CC	CC	CC	CC	TC	CC	CC	CC	TT
SSL2.50ch01_84335691	A	G	AA	AA	AA	AA	GG	GA	AA	AA	AA	GA	AA	GG	GG	AA	AA	AA	AA	AA	AA	AA	AA	AA	GG	AA	AA	AA	AA	AA	AA	AA	AA	AA	AA	AA	AA	AA	AA	AA	AA	AA	AA	AA	AA	AA	AA	AA	AA
SSL2.50ch01_84335728	A	G	AA	GG	AA	AA	AA	AA	GG	GG	AA	AA	AA	AA	AA	AA	AA	AA	AA	AA	AA	AA	AA	AA	AA	AA	AA	AA	AA	AA	AA	AA	AA	AA	AA	AA	AA	AA	AA	AA	AA	AA	AA	AA	AA	AA	AA	AA	AA
SSL2.50ch01_84336465	C	T	CC	NN	NN	TT	CC	CC	CC	CC	CC	NN	TT	CC	CC	NN	CC	CC	CC	CC	CC	CC	CC	NN	CC	CC	CC	CC	CC	CC	NN	CC	CC	CC	NN	TT	CC	CC	CC	NN	CC	NN	CC	CC	NN	CC	CC	CC	CC
SSL2.50ch01_84350203	G	A	GG	GG	GG	GG	AA	AA	GG	GG	AA	AA	AA	AA	AA	AA	AG	GG	AG	AA	GG	GG	AG	AG	GG	GG	GG	GG	AA	AA	GG	GG	GG	GG	GG	GG	AA	AA	GG	AA	GG	GG	GG	GG	AG	AA	AA	GG	AA
SSL2.50ch01_84350204	G	A	GG	GG	GG	GG	GG	GG	GG	GG	GG	GG	GG	GG	GG	GG	GG	GG	AG	AA	GG	GG	GG	GG	GG	GG	GG	GG	AA	AA	GG	GG	GG	GG	GG	GG	AA	AA	GG	AA	GG	GG	GG	GG	AG	AA	AA	GG	AA
SSL2.50ch01_84351870	A	G	GG	AA	GG	AA	AA	AA	AA	AA	AA	AA	AA	AA	AA	AA	AG	GG	AG	AA	GG	GG	AG	AG	AA	GG	GG	GG	AA	AG	GG	GG	GG	GG	GG	GG	AA	AA	GG	GG	AA	GG	GG	GG	AA	GG	GG	GG	GG
SSL2.50ch01_84351878	A	G	GG	AA	GG	AA	AA	AA	AA	AA	AA	AA	AA	AA	AA	AA	AG	GG	AG	AA	GG	GG	AG	AG	AA	GG	GG	GG	AA	AA	GG	GG	GG	GG	GG	GG	AA	AA	GG	GG	AA	GG	GG	GG	AA	AA	AA	GG	GG
SSL2.50ch01_84351890	G	A	AA	GG	AA	GG	GG	GG	GG	GG	GG	GG	GG	GG	GG	GG	AG	AA	AG	GG	AA	AA	AG	AG	GG	AA	AA	AA	GG	GG	AA	AA	AA	AA	AA	AA	GG	GG	AA	AA	GG	AA	AA	AA	GG	GG	GG	AA	AA
SSL2.50ch01_84394044	C	T	CC	TT	CC	CC	CC	CT	CC	CC	CC	CC	CC	CC	CC	TT	CT	CC	CC	CC	CC	CC	CT	CT	CC	CC	CC	CC	TT	CC	CC	CC	CC	CC	CC	CC	CC	CC	CC	CC	CC	CC	CC	CC	CC	CC	CC	CC	CC
SSL2.50ch01_84404102	C	T	CC	CC	CC	CC	CC	CT	CC	CC	CC	CC	CC	CC	CC	TT	CT	CC	CC	CC	CC	CC	CT	CT	CC	CC	CC	CC	CC	CC	CC	CC	CC	CC	CC	CC	CC	CC	CC	CC	CC	CC	CC	CC	CC	CC	CC	CC	CC
SSL2.50ch01_84404103	G	A	AA	GG	GG	AA	GG	AG	AA	AA	GG	GG	GG	GG	GG	GG	GG	GG	GG	GG	GG	GG	GG	GG	AA	GG	GG	GG	GG	AG	GG	GG	GG	GG	GG	GG	AA	AG	GG	AA	GG	AA	GG	GG	GG	GG	GG	GG	GG
SSL2.50ch01_84404115	G	A	AA	GG	GG	GG	GG	GG	GG	GG	GG	GG	GG	GG	GG	GG	GG	GG	GG	GG	GG	GG	GG	GG	GG	GG	GG	GG	GG	GG	GG	GG	GG	GG	GG	GG	GG	AG	GG	AA	GG	GG	GG	GG	GG	GG	GG	GG	GG
SSL2.50ch01_84425149	G	A	GG	GG	GG	GG	GG	GA	GG	GG	GG	GA	AA	GG	GG	GG	GG	GG	GG	GG	GG	GG	GG	GG	GG	GG	GG	GG	GG	GA	GG	AA	GG	GG	GG	GG	AA	GG	GG	GG	GG	GG	AA	GG	GG	GG	GG	GG	GG
SSL2.50ch01_84451061	A	G	AA	AA	AA	AA	AA	AG	AA	AA	NN	AG	AA	GG	GG	GG	AG	AA	AA	AA	AA	AA	AG	GG	AA	AA	AA	AA	AA	AA	AA	AA	AA	AA	AA	AA	AA	AA	AA	AA	AA	AA	AA	AA	AA	AA	AA	AA	AA
SSL2.50ch01_84453126	C	T	CC	CC	CC	TT	CC	CC	CC	CC	CC	CT	CC	CC	CC	CC	CC	CC	CC	CC	CC	CC	CC	CC	CC	CC	CC	CC	CC	CC	CC	CC	CC	CC	CC	CC	CC	CC	CC	CC	CC	CC	CC	CC	CC	CC	CC	CC	CC
SSL2.50ch01_84470187	T	A	TT	TT	TT	TT	AA	TT	TT	TT	TT	AA	TT	AA	TT	TT	TT	TT	TT	TT	TT	TT	TT	TT	TT	TT	TT	TT	TT	TT	TT	TT	TT	TT	TT	TT	TT	TT	TT	TT	TT	TT	TT	TT	TT	TT	TT	TT	TT
SSL2.50ch01_84509781	G	A	GG	GG	GG	GG	AA	AG	GG	GG	AA	AA	GG	AA	AA	AA	AG	GG	GG	GG	AA	GG	AG	AG	AA	AA	GG	GG	GG	GG	GG	GG	GG	GG	GG	GG	GG	GG	GG	GG	GG	GG	GG	GG	GG	GG	GG	GG	GG
SSL2.50ch01_84570966	G	A	GG	GG	GG	AA	GG	GG	GG	GG	AA	NN	GG	NN	AA	GG	GG	GG	AG	AA	AA	GG	GG	GG	GG	AA	NN	AA	GG	AG	GG	GG	GG	GG	AA	AA	AA	AA	GG	GG	AA	AA	GG	AA	AA	NN	AA	GG	AA
SSL2.50ch01_84577278	G	C	GG	GG	GG	GG	CC	GG	GG	GG	GG	GG	GG	GG	GG	GG	GG	GG	GG	GG	GG	GG	GG	GG	GG	GG	GG	GG	GG	CG	GG	GG	GG	GG	GG	GG	GG	GG	GG	GG	GG	GG	GG	GG	GG	GG	GG	GG	GG
SSL2.50ch01_84584166	A	G	AA	AA	GG	AA	AA	AA	AA	GG	AA	AA	AA	AA	AA	AA	AA	AA	AA	AA	AA	AA	AA	AA	AA	AA	AA	AA	AA	AA	AA	AA	AA	AA	AA	AA	AA	AA	AA	AA	AA	AA	AA	AA	AA	AA	AA	GG	AA
SSL2.50ch01_84586922	T	C	TT	NN	TT	CC	TT	TC	TT	TT	CC	TC	CC	CC	CC	CC	TC	TT	TC	CC	CC	TT	TC	TT	TT	CC	TT	CC	TT	TC	TT	TT	TT	TT	CC	CC	CC	TC	TT	TT	CC	CC	TT	CC	CC	CC	CC	TT	CC
SSL2.50ch01_84587003	T	C	TT	TT	CC	TT	TT	TT	TT	CC	TT	TT	TT	TT	TT	TT	TT	TT	TT	TT	TT	TT	TT	TT	TT	TT	TT	TT	CC	TT	NN	TT	TT	TT	TT	TT	TT	TT	CC	TT	TT	TT	TT	TT	TT	TT	TT	CC	TT
SSL2.50ch01_84591459	A	G	AA	AA	AA	GG	GG	NN	AA	AA	GG	AG	GG	GG	GG	GG	AG	AA	AA	AA	GG	AA	AG	AG	AA	GG	AG	GG	AA	GG	AA	AA	AA	AA	GG	GG	GG	AG	AA	AA	GG	GG	AA	GG	AG	GG	GG	AA	AA
SSL2.50ch01_84591499	T	A	TT	TT	TT	AA	AA	NN	TT	TT	AA	AT	AA	AA	AA	AA	AT	TT	TT	TT	AA	TT	AT	AT	TT	AA	AT	AA	TT	AA	TT	TT	TT	TT	AA	AA	AA	AT	TT	TT	AA	AA	TT	AA	AT	AA	AA	TT	TT
SSL2.50ch01_84591513	A	T	AA	AA	AA	TT	TT	NN	AA	AA	TT	AT	TT	TT	TT	TT	AT	AA	AA	AA	TT	AA	AT	AT	AA	TT	AT	TT	AA	TT	AA	AA	AA	AA	TT	TT	TT	AT	AA	AA	TT	TT	AA	TT	AT	TT	TT	AA	AA
SSL2.50ch01_84612365	T	C	TT	TT	TT	TT	TT	TC	TT	TT	TT	TT	TT	TT	CC	CC	TC	TT	TT	TT	TT	TT	TC	TC	TT	TT	TT	TT	TT	TT	TT	TT	TT	TT	TT	TT	TT	TT	TT	TT	TT	TT	TT	TT	TT	TT	TT	TT	TT
SSL2.50ch01_84612483	G	A	GG	NN	AA	GG	GG	GG	GG	GG	NN	GG	NN	GG	GG	NN	NN	GG	NN	GG	GG	GG	GG	NN	NN	NN	NN	NN	AA	GG	GG	GG	GG	GG	GG	GG	GG	AA	GG	GG	GG	GG	GG	GG	GG	GG	GG	GG	GG
SSL2.50ch01_84613408	G	A	NN	GG	GG	GG	GG	GG	GG	GG	NN	GG	GG	GG	GG	GG	GG	GG	GG	GG	GG	GG	GG	GG	GG	NN	NN	GG	NN	GG	GG	GG	GG	GG	GG	NN	GG	NN	GG	GG	GG	GG	GG	GG	GG	GG	GG	GG	GG
SSL2.50ch01_84624241	T	C	TT	TT	TT	CC	CC	CT	TT	TT	CC	TT	TT	TT	CC	TT	CT	TT	TT	TT	TT	TT	TT	CT	CC	TT	TT	TT	TT	TT	CC	TT	CC	TT	TT	TT	TT	TT	TT	TT	TT	TT	TT	TT	TT	TT	TT	TT	TT
SSL2.50ch01_84630201	T	G	TT	TT	TT	TT	TT	TT	TT	TT	TT	TT	TT	TT	TT	TT	GT	TT	TT	TT	TT	TT	TT	GT	TT	TT	TT	TT	TT	TT	GG	TT	GG	TT	TT	TT	TT	TT	TT	TT	TT	TT	TT	TT	TT	TT	TT	TT	TT
SSL2.50ch01_84730555	A	G	GG	AA	GG	AA	AA	GG	AA	AA	AA	GA	AA	AA	AA	GG	GA	AA	AA	AA	NN	AA	GA	GA	GG	NN	AA	AA	GG	GG	AA	AA	AA	AA	AA	GG	AA	AA	AA	AA	GG	AA	AA	AA	AA	AA	AA	GG	GG
SSL2.50ch01_84775513	C	T	CC	CC	CC	CC	CC	TT	CC	CC	CC	CC	CC	CC	TT	TT	TC	CC	CC	CC	CC	CC	TC	TC	CC	CC	CC	CC	CC	CC	CC	CC	CC	CC	CC	CC	CC	CC	CC	CC	CC	CC	CC	CC	CC	CC	CC	CC	CC
SSL2.50ch01_84775545	G	A	GG	GG	GG	AA	GG	AA	GG	GG	AA	GA	AA	GG	AA	AA	GA	GG	GG	GG	GG	GG	GA	GA	AA	GG	GG	AA	GG	GG	GG	GG	GG	GG	GG	AA	GG	GG	GG	GG	GG	AA	GG	GG	GA	GG	GG	GG	GG
SSL2.50ch01_84775558	A	G	AA	AA	AA	GG	AA	GG	AA	AA	GG	GA	GG	AA	GG	GG	GA	AA	AA	AA	AA	AA	GA	GA	GG	AA	AA	GG	AA	AA	AA	AA	AA	AA	AA	GG	AA	AA	AA	AA	AA	GG	AA	AA	GA	AA	AA	AA	AA
SSL2.50ch01_84775559	T	C	TT	TT	TT	TT	TT	TT	TT	TT	CC	TC	CC	TT	TT	TT	TT	TT	TT	TT	TT	TT	TT	TT	TT	TT	TT	CC	TT	TT	TT	TT	TT	TT	TT	TT	TT	TT	TT	TT	TT	TT	TT	TT	TT	TT	TT	TT	TT
SSL2.50ch01_84803239	T	A	AA	TT	TT	AA	TT	AA	TT	AA	AA	TT	AA	TT	AA	AA	AT	TT	TT	TT	TT	TT	AT	NN	TT	TT	TT	AA	TT	AT	TT	TT	TT	TT	TT	TT	TT	TT	TT	AA	TT	TT	TT	TT	AA	AA	AA	TT	TT
SSL2.50ch01_84806680	T	G	GG	TT	NN	NN	TT	NN	TT	GG	GG	TT	GG	TT	GG	GG	GT	TT	TT	TT	TT	TT	GG	NN	TT	TT	TT	GG	TT	GT	TT	TT	TT	TT	TT	NN	TT	TT	TT	GG	TT	TT	TT	TT	GG	GG	GG	TT	TT
SSL2.50ch01_84808910	C	T	NN	CC	CC	NN	CC	CC	CC	TT	CC	CC	CC	CC	CC	NN	CC	CC	NN	CC	CC	NN	CC	NN	CC	CC	CC	NN	CC	TC	CC	CC	CC	CC	CC	NN	CC	CC	CC	TT	CC	CC	CC	CC	TT	TT	TT	CC	CC
SSL2.50ch01_84842938	A	G	AA	AA	AA	AA	AA	GA	AA	AA	AA	AA	AA	AA	AA	GG	GA	AA	AA	AA	AA	AA	GA	GA	AA	AA	AA	GG	AA	AA	AA	AA	AA	AA	AA	AA	GG	AA	AA	AA	GG	AA	AA	AA	AA	AA	AA	AA	AA
SSL2.50ch01_84845533	A	G	AA	GA	AA	NN	AA	NN	AA	AA	AA	AA	AA	AA	AA	GG	GA	AA	AA	AA	AA	AA	GA	NN	AA	NN	AA	GG	AA	NN	AA	AA	AA	AA	AA	AA	GG	GA	AA	AA	GG	AA	AA	AA	AA	AA	AA	AA	AA
SSL2.50ch01_84846079	T	A	TT	TT	TT	TT	TT	NN	TT	TT	TT	TT	TT	TT	TT	AA	AT	TT	TT	TT	TT	TT	AT	NN	TT	TT	TT	AA	TT	TT	TT	TT	TT	TT	TT	TT	AA	TT	TT	TT	AA	TT	TT	TT	TT	TT	TT	TT	TT
SSL2.50ch01_84856043	G	A	GG	GG	AA	AA	GG	GG	GG	GG	GG	GG	GG	GG	GG	GG	GG	GG	GG	GG	GG	GG	GG	GG	AA	GG	GG	GG	GG	AG	GG	GG	GG	GG	GG	AA	GG	GG	GG	GG	GG	AA	GG	GG	NN	GG	GG	GG	AA
SSL2.50ch01_84860829	C	A	CC	CC	CC	CC	CC	CA	CC	CC	AA	CA	AA	CC	CC	AA	CA	CC	NN	CA	CC	CC	CA	CA	CC	CC	CC	AA	CC	CC	CC	CC	CC	CC	CC	CC	CC	CC	CC	CC	CC	CC	CC	CC	CC	CC	CC	CC	CC
SSL2.50ch01_84890970	G	A	GG	GG	GG	GG	GG	GG	GG	GG	GG	AA	NN	AA	AA	GG	GA	GG	GG	GG	GG	GG	GA	GG	GG	GG	GG	GG	GG	GG	GG	GG	GG	GG	GG	GG	GG	GG	GG	GG	GG	GG	GG	GG	GG	GG	GG	GG	GG
SSL2.50ch01_84912028	C	A	CC	CC	CC	CC	CC	CC	CC	CC	AA	AA	CC	AA	AA	CC	CC	CC	CC	CC	CC	CC	CC	CC	CC	CC	CC	AA	CC	CC	CC	CC	CC	CC	CC	CC	CC	CC	CC	CC	CC	CC	CC	CC	CC	CC	CC	CC	CC
SSL2.50ch01_84924210	C	T	CC	CC	CC	CC	TT	CC	CC	CC	CC	TT	CC	TT	TT	CC	CC	CC	CC	CC	CC	CC	CC	CC	CC	CC	CC	CC	CC	CT	CC	CC	CC	CC	CC	CC	CC	CC	CC	CC	CC	CC	CC	CC	CC	CC	CC	CC	CC
SSL2.50ch01_84928490	C	G	GG	CC	CC	GG	GG	CG	CC	CC	GG	CC	CC	CC	CC	GG	CC	CC	CC	CC	CC	CC	CG	CG	GG	CC	CC	CC	GG	CG	CC	CC	CC	CC	CC	CC	GG	CG	CC	GG	CC	CC	CC	CC	CC	CC	CC	CC	CC
SSL2.50ch01_84951876	C	T	CC	CC	CC	CC	CC	CC	CC	CC	CC	CC	CC	CC	CC	CC	CC	CC	CC	CC	CC	CC	CC	CC	CC	CC	CC	CC	TT	CC	CC	CC	CC	CC	CC	CC	CC	TC	TT	TT	TT	CC	CC	CC	CC	CC	CC	CC	CC
SSL2.50ch01_84979151	G	A	GG	GG	GG	GG	GG	GG	GG	GG	NN	AA	NN	NN	AA	GG	GG	GG	GG	GG	GG	GG	GG	GG	GG	GG	GG	NN	GG	GG	GG	GG	GG	GG	GG	GG	GG	GG	GG	GG	GG	GG	GG	GG	GG	GG	GG	GG	GG
SSL2.50ch01_84979203	C	A	CC	CC	CC	CC	CC	CC	CC	CC	NN	AA	NN	NN	AA	CC	CC	CC	CC	CC	CC	CC	CC	CC	CC	CC	CC	NN	CC	CC	CC	CC	CC	CC	CC	CC	CC	CC	CC	CC	CC	CC	CC	CC	CC	CC	CC	CC	CC
SSL2.50ch01_84979209	G	C	GG	GG	GG	GG	GG	GG	GG	GG	NN	CC	NN	NN	CC	GG	GG	GG	GG	GG	GG	GG	GG	GG	GG	GG	GG	NN	GG	GG	GG	GG	GG	GG	GG	GG	GG	GG	GG	GG	GG	GG	GG	GG	GG	GG	GG	GG	GG
SSL2.50ch01_84979270	T	C	TT	TT	TT	TT	TT	CT	TT	TT	CC	CC	CC	CC	CC	TT	CT	TT	TT	TT	TT	TT	TT	TT	TT	TT	TT	CC	TT	TT	TT	TT	TT	TT	TT	TT	TT	TT	TT	TT	TT	TT	TT	TT	TT	TT	TT	TT	TT
SSL2.50ch01_84979274	G	A	GG	GG	GG	GG	GG	AG	GG	GG	AA	AA	AA	AA	AA	GG	AG	GG	GG	GG	GG	GG	GG	GG	GG	GG	GG	AA	GG	GG	GG	GG	GG	GG	GG	GG	GG	GG	GG	GG	GG	GG	GG	GG	GG	GG	GG	GG	GG
SSL2.50ch01_84979311	G	C	GG	GG	GG	GG	GG	CG	GG	GG	CC	CC	CC	CC	CC	GG	CG	GG	GG	GG	GG	GG	GG	GG	GG	GG	GG	CC	GG	GG	GG	GG	GG	GG	GG	GG	GG	GG	GG	GG	GG	GG	GG	GG	GG	GG	GG	GG	GG
SSL2.50ch01_84981485	T	G	TT	TT	TT	TT	TT	GG	TT	TT	GG	GG	GG	GG	GG	GG	TG	TT	TT	TT	TT	TT	TG	NN	TT	TT	TT	GG	TT	TT	TT	TT	TT	TT	NN	TT	TT	TT	TT	TT	TT	TT	TT	TT	TT	TT	TT	TT	TT
SSL2.50ch01_84981545	A	T	AA	AA	AA	AA	AA	TT	AA	AA	TT	TT	TT	TT	TT	TT	TA	AA	AA	AA	AA	AA	TA	NN	AA	AA	AA	TT	AA	AA	AA	AA	AA	AA	NN	AA	AA	AA	AA	AA	AA	AA	AA	AA	AA	AA	AA	AA	AA
SSL2.50ch01_84997744	A	T	AA	AA	AA	AA	AA	TT	AA	AA	TT	TT	TT	TT	TT	TT	TT	AA	AA	AA	AA	NN	AT	AT	AA	AA	AA	TT	AA	AA	AA	AA	AA	AA	AA	AA	AA	AA	AA	AA	AA	AA	AA	AA	AA	AA	AA	AA	AA
SSL2.50ch01_85018126	T	C	TT	TT	TT	CC	CC	NN	CC	TT	CC	CC	CC	CC	CC	CC	TC	TT	TT	TT	CC	CC	TC	TC	CC	CC	TC	CC	CC	CC	TT	TT	TT	CC	TT	TT	TT	CC	CC	TT	CC	TT	TT	CC	TT	TT	TT	TT	TT
SSL2.50ch01_85060520	T	A	TT	TT	TT	TT	TT	TT	TT	TT	AA	TA	TT	AA	TT	TT	TT	TT	TT	TT	TT	TT	TT	TT	AA	TT	TT	AA	TT	TT	TT	TT	TT	TT	TT	TT	TT	TT	TT	TT	TT	TT	TT	TT	TT	TT	TT	TT	TT
SSL2.50ch01_85060639	T	A	TT	TT	TT	TT	TT	TT	TT	TT	AA	AT	TT	AA	TT	TT	TT	TT	TT	TT	TT	TT	TT	TT	AA	TT	TT	AA	TT	TT	TT	TT	TT	TT	TT	TT	TT	TT	TT	TT	TT	TT	TT	TT	TT	TT	TT	TT	TT
SSL2.50ch01_85076967	T	C	TT	CC	TT	TT	TT	TT	TT	TT	CC	CC	CC	CC	CC	TT	TC	TT	TT	TT	TT	TT	TT	TT	CC	TT	TT	CC	TT	TT	TT	TT	TT	TT	TT	TT	TT	TT	TT	CC	TT	TT	TT	TT	TT	CC	CC	CC	TT
SSL2.50ch01_85098676	T	G	TT	TT	TT	TT	TT	NN	TT	TT	TT	GG	TT	GG	GG	TT	GT	TT	TT	TT	TT	TT	TT	TT	TT	TT	TT	TT	TT	TT	TT	TT	TT	TT	TT	TT	TT	TT	TT	TT	TT	TT	TT	TT	TT	TT	TT	TT	TT
SSL2.50ch01_85101693	A	G	GG	AA	GG	AA	AA	NN	AA	AA	AA	AA	AA	AA	AA	NN	AA	AA	AG	GG	GG	AA	AA	AA	AA	GG	AA	NN	AA	GG	GG	AA	GG	AA	AA	AA	AA	AG	AA	GG	GG	GG	AA	AA	AA	AA	GG	GG	GG
SSL2.50ch01_85108099	G	A	GG	GG	GG	GG	GG	GG	AA	AA	GG	GG	GG	GG	GG	GG	GG	AA	AA	AA	GG	GG	GA	GG	GG	GG	GA	GG	GG	GG	GG	AA	GG	GG	GG	GG	GG	GG	GG	GG	GG	GG	AA	GG	GG	GG	GG	AA	GG
SSL2.50ch01_85108179	C	A	CC	CC	CC	CC	AA	AC	CC	CC	AA	CC	CC	CC	CC	AA	CC	CC	CC	CC	CC	CC	AC	AC	CC	CC	CC	CC	CC	AC	CC	CC	CC	CC	CC	CC	AA	CC	CC	CC	AA	AA	CC	AA	CC	CC	CC	CC	CC
SSL2.50ch01_85134622	A	G	AA	AA	AA	AA	AA	AA	AA	AA	AA	AA	AA	AA	AA	AA	AA	AA	AA	AA	AA	AA	AA	AA	AA	AA	AA	AA	AA	AA	AA	GG	AA	AA	AA	AA	AA	AA	AA	AA	AA	AA	GG	AA	AA	AA	AA	AA	AA
SSL2.50ch01_85149214	G	A	AA	GG	GG	GG	GG	GA	GG	GG	GG	GG	AA	GG	GG	GG	GG	GG	GG	GG	GG	GG	GG	GA	GG	GG	GG	GG	GA	GG	GG	GG	GG	GG	GG	GG	AA	GG	AA	AA	GG	AA	GG	AA	GG	GG	GG	GG	GG
SSL2.50ch01_85149315	T	C	CC	TT	TT	TT	TT	CT	TT	TT	CC	CT	CC	CC	CC	TT	CT	TT	TT	TT	TT	TT	TT	CT	TT	TT	TT	CC	CT	TT	TT	TT	TT	TT	TT	TT	CC	TT	CC	CC	TT	CC	TT	CC	TT	TT	TT	TT	TT
SSL2.50ch01_85161500	T	A	TT	TT	TT	TT	TT	TT	TT	TT	TT	TT	TT	TT	TT	TT	TT	TT	TT	TT	TT	AA	TT	TT	TT	TT	TT	TT	TT	TT	AA	TT	AA	TT	TT	TT	TT	TT	TT	TT	TT	TT	TT	TT	TT	TT	AA	TT	TT
SSL2.50ch01_85161530	C	A	CC	CC	CC	CC	CC	CC	CC	CC	CC	CC	CC	CC	CC	CC	CC	CC	CC	CC	CC	CC	CA	CA	CC	CC	CA	CC	CA	CA	CC	CC	CC	AA	CC	CC	CC	CC	AA	CC	CC	AA	CC	CC	CC	CC	CC	AA	AA
SSL2.50ch01_85161543	C	T	CC	CC	CC	CC	CC	CC	CC	CC	CC	CC	CC	CC	CC	CC	CC	CC	CC	CC	CC	CC	CC	CC	CC	CC	CC	CC	CC	CC	CC	CC	CC	CC	CC	CC	CC	TC	CC	CC	CC	CC	CC	CC	CC	CC	CC	CC	CC
SSL2.50ch01_85161598	C	A	CC	CC	AA	CC	CC	CC	CC	CC	CC	CC	CC	CC	CC	CC	CC	CC	CC	CC	AA	CC	CC	CC	CC	AA	CC	CC	CC	CC	CC	CC	CC	CC	CC	CC	AA	CC	CC	AA	CC	CC	CC	AA	AA	CC	CC	CC	CC
SSL2.50ch01_85161613	C	T	TT	CC	TT	CC	TT	CC	TT	TT	CC	CC	CC	CC	CC	CC	CT	CC	CT	CC	TT	TT	CC	CT	CC	TT	CC	CC	CC	CT	TT	CC	TT	CC	CC	TT	TT	CT	CC	TT	TT	CC	CC	TT	TT	CC	TT	CC	CC
SSL2.50ch01_85161645	T	C	TT	TT	TT	CC	TT	TT	TT	TT	TT	TT	TT	TT	TT	TT	TT	CC	CT	CC	TT	TT	CT	CT	CC	TT	CT	TT	CT	CT	TT	CC	TT	CC	TT	TT	TT	CT	CC	TT	TT	CC	CC	TT	TT	TT	TT	CC	CC
SSL2.50ch01_85166493	G	A	NN	GG	GG	GG	GG	NN	GG	GG	NN	GG	GG	GG	GG	NN	GG	GG	GG	GG	AA	GG	GG	GG	GG	AA	GG	GG	GG	GG	GG	GG	GG	GG	GG	GG	AA	NN	GG	AA	GG	GG	GG	AA	AA	GG	GG	GG	GG
SSL2.50ch01_85198521	A	G	GG	AA	AA	AA	AA	AA	AA	AA	AA	AA	AA	AA	AA	AA	AA	AA	AG	GG	GG	AA	AA	AA	AA	GG	AA	AA	AA	AA	AA	AA	AA	AA	AA	AA	AA	AA	NN	GG	AA	AA	AA	AA	AA	AA	AA	AA	AA
SSL2.50ch01_85198540	G	T	GG	GG	GG	GG	GG	GG	GG	GG	TT	GT	GG	TT	GG	GG	GG	GG	GG	GG	GG	GG	GG	GG	GG	GG	GG	TT	GG	GG	GG	GG	GG	GG	GG	GG	GG	GG	NN	GG	GG	GG	GG	GG	GG	GG	GG	GG	GG
SSL2.50ch01_85234649	C	T	CC	CC	CC	CC	CC	CC	CC	CC	TT	CT	CC	CC	TT	CC	CC	CC	CC	CC	CC	CC	CC	CC	CC	CC	CC	TT	CC	CC	CC	CC	CC	CC	CC	CC	CC	CC	CC	CC	CC	CC	CC	CC	CC	CC	CC	CC	CC
SSL2.50ch01_85240695	C	T	CC	CC	CC	CC	CC	CC	CC	CC	NN	CC	CC	CC	CC	CC	CC	CC	CC	CC	CC	CC	CC	CC	CC	CC	CC	CC	CC	CC	CC	CC	CC	CC	CC	CC	CC	CC	CC	CC	CC	CC	TT	CC	CC	CC	CC	CC	CC
SSL2.50ch01_85244752	A	G	AA	GG	AA	AA	AA	AA	GG	GG	AA	AA	AA	AA	AA	AA	AA	AA	AA	AA	AA	AA	AA	AA	AA	AA	AA	AA	AA	AA	AA	AA	AA	GG	AA	AA	AA	AA	AA	AA	AA	AA	AA	AA	AA	AA	GG	AA	GG
SSL2.50ch01_85244823	A	G	AA	AA	AA	GG	AA	AA	AA	AA	AA	AA	AA	AA	AA	AA	AA	AA	AA	AA	AA	AA	AA	AA	AA	AA	AA	AA	AA	AA	AA	AA	AA	AA	AA	AA	AA	AA	AA	AA	AA	AA	AA	AA	AA	AA	AA	AA	AA
SSL2.50ch01_85303607	A	G	GG	GG	AA	AA	AA	AA	AA	GG	AA	AA	AA	AA	AA	AA	GA	GG	GG	GG	AA	GG	GA	GA	AA	AA	GG	AA	AA	AA	GG	GG	GG	GG	GG	AA	AA	AA	AA	AA	AA	AA	GG	AA	AA	GG	GG	AA	AA
SSL2.50ch01_85303649	T	G	TT	TT	TT	TT	GG	GG	TT	TT	GG	GG	TT	GG	GG	GG	TG	TT	TT	TT	TT	TT	TG	TG	TT	TT	TT	GG	TT	GG	TT	TT	TT	TT	TT	TT	TT	GG	TT	GG	GG	GG	TT	GG	TT	TT	TT	TT	GG
SSL2.50ch01_85303727	A	T	AA	AA	AA	TT	AA	AA	AA	AA	AA	AA	TT	AA	AA	AA	AA	AA	AA	AA	AA	AA	AA	AA	AA	AA	AA	AA	AA	AA	AA	AA	AA	AA	AA	AA	AA	AA	AA	AA	AA	AA	AA	AA	AA	AA	AA	AA	AA
SSL2.50ch01_85313131	C	T	CC	CC	CC	CC	TT	TT	CC	CC	TT	TT	CC	TT	TT	TT	CT	CC	CC	CC	TT	CC	CT	CT	TT	TT	CT	TT	CC	CT	CC	CC	CC	CC	CC	CC	CC	CT	TT	TT	TT	TT	CC	TT	CC	CC	CC	CC	CC
SSL2.50ch01_85335480	C	A	CC	CC	CC	CC	CC	CC	CC	CC	AA	AA	CC	AA	CC	CC	AC	CC	CC	CC	CC	CC	CC	CC	CC	CC	CC	AA	CC	CC	CC	CC	CC	CC	CC	CC	CC	CC	CC	CC	CC	CC	CC	CC	CC	CC	CC	CC	CC
SSL2.50ch01_85359961	C	T	CC	CC	CC	CC	TT	CC	CC	CC	CC	TC	CC	CC	CC	CC	CC	CC	CC	CC	CC	CC	CC	TC	CC	CC	CC	CC	CC	TC	CC	CC	CC	CC	CC	CC	CC	CC	CC	CC	CC	CC	CC	CC	CC	CC	CC	CC	CC
SSL2.50ch01_85360001	A	G	AA	AA	AA	AA	GG	GA	AA	AA	GG	GA	AA	AA	GG	GG	AA	AA	AA	AA	AA	AA	GA	GA	AA	AA	AA	GG	AA	GA	AA	AA	AA	AA	AA	AA	AA	AA	AA	AA	AA	AA	AA	AA	AA	AA	AA	AA	AA
SSL2.50ch01_85364870	A	G	AA	AA	AA	AA	AA	AA	AA	AA	AA	AA	AA	AA	AA	AA	AA	AA	AA	AA	AA	GG	AG	AA	AA	NN	AG	AA	AA	NN	AA	AA	AA	AA	AA	AA	AA	AA	AA	AA	AA	AA	AA	AA	NN	AA	AA	AA	AA
SSL2.50ch01_85364914	G	A	GG	GG	GG	GG	GG	AG	GG	GG	AA	GG	GG	GG	AA	AA	GG	GG	GG	GG	GG	GG	AG	GG	GG	NN	GG	AA	GG	NN	GG	GG	GG	GG	GG	GG	GG	GG	GG	GG	GG	GG	GG	GG	NN	GG	GG	GG	GG
SSL2.50ch01_85366684	T	G	TT	TT	TT	NN	GG	TT	TT	TT	TT	TG	TT	TT	TT	TT	TT	TT	TT	TT	TT	TT	TT	TT	TT	TT	TT	TT	TT	TG	TT	TT	TT	TT	TT	TT	TT	TT	TT	TT	TT	TT	TT	TT	TT	TT	TT	TT	TT
SSL2.50ch01_85367161	A	G	AA	AA	AA	AA	AA	AG	AA	AA	GG	AA	AA	AA	GG	GG	AA	AA	AA	AA	AA	AA	AG	AA	AA	AA	AA	GG	AA	AA	AA	AA	AA	AA	AA	AA	AA	AA	AA	AA	AA	AA	AA	AA	AA	AA	AA	AA	AA
SSL2.50ch01_85399097	A	G	AA	AA	AA	NN	AA	NN	AA	AA	GG	AG	GG	AA	GG	AA	GG	AA	AG	AA	AA	NN	AA	AG	GG	AA	AA	NN	AG	AG	GG	AA	GG	GG	AA	AA	AA	NN	AA	AA	AA	GG	AA	AA	AA	GG	AA	AA	AA
SSL2.50ch01_85399126	T	C	TT	TT	TT	TT	TT	TT	TT	TT	TT	TT	TT	TT	TT	TT	TT	TT	TC	TT	TT	NN	TT	TC	TT	NN	TT	TT	TC	CC	CC	TT	CC	CC	TT	TT	TT	TT	NN	TT	TT	CC	TT	NN	TT	CC	TT	TT	TT
SSL2.50ch01_85417588	A	C	AA	AA	NN	CA	AA	AA	AA	AA	NN	AA	AA	AA	AA	AA	AA	AA	AA	NN	AA	AA	AA	NN	AA	CA	NN	NN	AA	AA	CA	AA	AA	AA	NN	AA	AA	NN	AA	AA	AA	AA	AA	AA	AA	AA	AA	CA	AA
SSL2.50ch01_85418736	T	G	TT	TT	NN	TT	TT	TT	TT	TT	TT	TG	GG	GG	TT	NN	TT	TT	NN	TT	TT	NN	TT	TT	TT	NN	TT	TT	TT	TT	NN	TT	TT	TT	TT	TT	NN	NN	TT	TT	TT	TT	TT	TT	TT	TT	TT	TT	TT
SSL2.50ch01_85431036	A	G	AA	AA	GG	AA	GG	GA	AA	AA	AA	GA	GG	GG	GG	GG	AA	AA	GA	GG	GG	AA	GA	GA	GG	GG	GA	AA	NN	GA	AA	AA	AA	AA	AA	AA	AA	AA	GG	GG	AA	GG	AA	GG	GA	AA	AA	AA	GA
SSL2.50ch01_85431071	C	A	CC	CC	AA	AA	AA	CA	CC	CC	AA	CA	AA	AA	AA	AA	CA	CC	CA	AA	AA	CC	CA	CA	AA	AA	CA	AA	AA	CA	CC	CC	CC	CC	CC	CC	CC	CC	AA	AA	CC	AA	CC	AA	CA	CC	CC	CC	CA
SSL2.50ch01_85431134	C	G	CC	CC	GG	GG	GG	CG	CC	CC	GG	CG	GG	GG	GG	GG	CG	CC	CG	GG	GG	NN	CG	CG	GG	GG	GG	GG	GG	NN	CC	CC	CC	CC	CC	CC	CC	CC	GG	GG	CC	GG	CC	GG	CG	CC	CC	CC	GG
SSL2.50ch01_85434143	A	C	AA	AA	NN	CC	CC	NN	AA	AA	NN	AC	CC	CC	CC	CC	AC	AA	AC	CC	CC	AA	CC	AC	CC	CC	AC	CC	CC	AA	AC	AA	AA	AA	AA	AA	AA	NN	CC	CC	AA	CC	AA	CC	AC	AA	AA	AA	CC
SSL2.50ch01_85436354	T	G	TT	TT	GG	GG	GG	GT	TT	TT	GG	GT	GG	GG	GG	GG	TT	TT	GT	GG	GG	TT	GT	GT	GG	GG	GT	GG	GG	NN	TT	TT	TT	TT	TT	TT	TT	GT	GG	GG	TT	GG	TT	GG	GT	TT	TT	TT	GG
SSL2.50ch01_85439992	C	T	CC	CC	TT	NN	CC	NN	CC	CC	NN	CC	CC	CC	CC	CC	CC	CC	CC	CC	CC	CC	CC	CC	CC	CC	CC	NN	NN	NN	CC	CC	CC	CC	CC	NN	CC	CC	CC	CC	CC	CC	CC	CC	CC	CC	CC	CC	TT
SSL2.50ch01_85440023	C	G	CC	CC	GG	NN	CC	NN	CC	CC	NN	CC	CC	CC	CC	CC	CC	CC	CC	CC	CC	CC	CC	CC	CC	CC	CC	NN	NN	NN	CC	CC	CC	CC	CC	NN	CC	CC	CC	CC	CC	CC	CC	CC	CC	CC	CC	CC	GG
SSL2.50ch01_85440045	T	C	TT	TT	NN	NN	TT	NN	TT	TT	NN	CT	TT	TT	TT	TT	TT	TT	TT	TT	TT	TT	TT	TT	TT	TT	TT	NN	NN	NN	TT	TT	TT	TT	TT	NN	TT	TT	TT	TT	TT	TT	TT	TT	TT	TT	TT	TT	NN
SSL2.50ch01_85448132	G	T	GG	TT	GG	GG	GG	GG	TT	TT	GG	GG	GG	GG	GG	GG	GG	TT	GT	GG	GG	TT	GT	GT	GG	GG	GT	GG	GG	NN	TT	TT	TT	TT	TT	GG	TT	GG	GG	GG	TT	GG	TT	GG	TT	TT	TT	TT	GG
SSL2.50ch01_85455275	A	G	AA	AA	AA	AA	AA	GG	AA	AA	GG	GA	GG	AA	AA	GG	GA	AA	GA	GG	GG	AA	GA	GA	GG	GG	GA	GG	GA	AA	AA	AA	AA	AA	AA	AA	AA	GA	AA	GG	AA	GG	AA	GG	AA	AA	AA	AA	AA
SSL2.50ch01_85474086	T	C	TT	TT	TT	TT	CC	TT	TT	TT	CC	CC	TT	CC	CC	TT	CT	TT	TT	TT	TT	NN	TT	TT	CC	TT	TT	CC	TT	CT	TT	TT	TT	TT	TT	TT	TT	TT	TT	TT	TT	TT	TT	TT	TT	TT	TT	TT	CC
SSL2.50ch01_85532469	C	T	CC	CC	CC	CC	CC	CC	CC	CC	CC	CC	CC	CC	CC	CC	TC	CC	TC	CC	CC	TT	TC	TC	CC	CC	TT	NN	CC	CC	TT	TT	TT	TT	CC	CC	CC	CC	CC	CC	CC	CC	TT	CC	CC	CC	CC	CC	CC
SSL2.50ch01_85535358	A	T	AA	AA	TT	AA	AA	AT	AA	AA	AA	AA	TT	AA	AA	AA	AT	TT	TT	TT	AA	NN	AT	AT	AA	AA	TT	AA	TT	AA	TT	TT	TT	TT	TT	AA	TT	AA	AA	AA	TT	TT	TT	TT	AA	TT	TT	AA	TT
SSL2.50ch01_85535426	A	G	AA	AA	AA	AA	AA	AA	AA	AA	AA	GG	AA	GG	AA	AA	AG	AA	AA	AA	AA	NN	AA	AA	AA	AA	AA	AA	AA	AA	AA	AA	AA	AA	AA	AA	AA	AA	AA	AA	AA	AA	AA	AA	AA	AA	AA	GG	AA
SSL2.50ch01_85564233	A	C	AA	AA	AA	AA	AA	CA	AA	AA	AA	AA	AA	AA	CC	CC	AA	AA	AA	AA	AA	AA	CA	CA	AA	AA	AA	CC	CA	AA	AA	AA	AA	AA	AA	AA	AA	AA	AA	AA	AA	AA	AA	AA	AA	AA	AA	AA	AA
SSL2.50ch01_85564264	A	T	TT	TT	TT	AA	AA	AA	TT	TT	AA	AA	AA	AA	AA	AA	TA	AA	AA	AA	AA	NN	TA	TA	TT	AA	TA	AA	AA	TA	AA	AA	AA	TT	TT	TT	TT	AA	AA	AA	AA	TT	AA	AA	AA	TT	AA	TT	TT
SSL2.50ch01_85567987	C	T	CC	CC	CC	CC	CC	CC	CC	CC	TT	CC	CC	CC	TT	CC	CC	CC	CC	CC	CC	CC	CC	CC	CC	CC	CC	TT	CC	CC	CC	CC	CC	CC	CC	CC	CC	CC	CC	CC	CC	CC	CC	CC	CC	CC	CC	CC	CC
SSL2.50ch01_85599199	T	C	CC	TT	TT	TT	CC	TT	TT	TT	TT	TT	TT	TT	TT	TT	CC	CC	NN	TT	CC	TT	CT	CT	TT	CC	CC	TT	CC	CC	TT	TT	TT	TT	TT	TT	CC	CC	TT	CC	CC	TT	CC	CC	CT	CC	TT	CC	TT
SSL2.50ch01_85608609	G	A	GG	AA	GG	GG	GG	GG	AA	AA	GG	GG	GG	GG	GG	GG	GG	GG	GA	AA	GG	GG	GG	GG	GG	GG	GG	GG	GG	GG	GG	GG	GG	AA	AA	GG	GG	GG	GG	GG	GG	GG	GG	GG	GA	GG	GG	GG	GG
SSL2.50ch01_85608699	A	T	AA	TT	AA	TT	AA	TT	TT	TT	TT	AT	AA	TT	AA	TT	AT	AA	AT	TT	AA	AA	AT	AA	AA	AA	AA	TT	AA	AA	AA	AA	AA	TT	TT	TT	AA	AA	AA	AA	AA	AA	AA	AA	AT	AA	AA	AA	AA
SSL2.50ch01_85658498	T	C	CC	TT	TT	TT	TT	TT	CC	CC	TT	TT	TT	TT	TT	TT	TT	TT	TT	TT	TT	NN	TT	TT	TT	TT	TT	TT	TT	TC	TT	TT	TT	TT	TT	TT	TT	TT	CC	TT	CC	TT	TT	TT	TC	CC	CC	CC	CC
SSL2.50ch01_85658504	A	G	AA	AA	GG	GG	GG	GA	AA	AA	AA	AA	AA	AA	AA	AA	AA	AA	GA	GG	GG	NN	AA	AA	GG	GG	GA	AA	GG	GA	AA	AA	AA	AA	GG	GG	GG	GG	AA	GG	AA	GG	AA	GG	GA	AA	AA	AA	AA
SSL2.50ch01_85658517	A	G	AA	AA	AA	AA	AA	AA	AA	AA	GG	AA	GG	AA	GG	AA	GA	AA	AA	AA	AA	NN	AA	AA	AA	AA	AA	GG	AA	AA	AA	AA	AA	AA	AA	AA	AA	AA	AA	AA	AA	AA	AA	AA	AA	AA	AA	AA	AA
SSL2.50ch01_85658596	T	C	TT	TT	CC	CC	CC	TT	TT	TT	TT	TT	TT	TT	TT	TT	TT	TT	CC	CC	TT	NN	TT	TT	CC	TT	CC	TT	CC	CT	TT	TT	TT	NN	CC	TT	NN	CC	NN	CC	TT	CC	TT	CC	CT	TT	TT	TT	TT
SSL2.50ch01_85661571	C	T	TT	CC	TT	CC	CC	CT	TT	TT	CC	CC	TT	CC	TT	CC	CT	CC	CC	CC	CC	CC	CC	CC	CC	CC	CC	TT	CT	CT	CC	CC	CC	CC	TT	TT	CC	TT	TT	CC	CC	TT	CC	TT	TT	TT	TT	TT	CC
SSL2.50ch01_85661614	G	A	GG	GG	GG	GG	GG	AG	GG	GG	AA	AA	GG	AA	GG	AA	GG	GG	GG	GG	GG	GG	AG	AG	GG	GG	GG	GG	GG	GG	GG	GG	GG	GG	GG	GG	GG	GG	GG	GG	GG	GG	GG	GG	GG	GG	GG	GG	GG
SSL2.50ch01_85676345	C	T	CC	CC	CC	TT	CC	TT	CC	CC	CC	CC	CC	CC	TT	CC	TC	TT	CC	CC	CC	TT	TC	CC	TT	CC	TC	CC	TC	CC	TT	TT	TT	TT	CC	CC	CC	CC	CC	CC	CC	CC	TT	CC	CC	CC	CC	CC	CC
SSL2.50ch01_85680795	T	C	TT	TT	TT	TT	TT	TC	TT	TT	CC	TT	TT	TT	TT	CC	TT	TT	TC	CC	TT	TT	TT	TC	TT	TT	TT	CC	TT	TT	TT	TT	TT	TT	TT	TT	TT	TT	TT	TT	CC	CC	TT	TT	CC	TT	TT	TT	TT
SSL2.50ch01_85681974	C	A	CC	CC	CC	CC	CC	AC	CC	CC	AA	CC	CC	CC	CC	AA	CC	CC	AC	AA	CC	CC	AC	AC	CC	CC	CC	AA	CC	CC	CC	CC	CC	CC	CC	CC	CC	CC	CC	CC	AA	AA	CC	CC	AA	CC	CC	CC	CC
SSL2.50ch01_85688110	T	C	CC	TT	TT	CC	TT	CC	CC	TT	CC	TC	CC	CC	CC	CC	CC	TT	TT	TT	TT	TT	TC	CC	TT	TT	CC	CC	TC	TT	TT	TT	TT	TT	CC	CC	CC	CC	TT	CC	TT	TT	TT	TT	TT	CC	CC	CC	CC
SSL2.50ch01_85689253	C	T	CC	CC	CC	TT	CC	CC	CC	CC	CC	CT	TT	CC	CC	CC	CC	CC	CC	NN	CC	NN	CC	CC	CC	CC	CC	CC	CC	CC	CC	CC	CC	CC	CC	CC	CC	CC	CC	CC	CC	CC	CC	CC	CC	CC	CC	CC	CC
SSL2.50ch01_85691629	A	G	AA	GG	GG	AA	AA	AA	AA	AA	AA	AA	AA	AA	AA	AA	AA	AA	AA	AA	AA	NN	AA	AA	NN	AA	AA	AA	AA	AA	AA	AA	AA	AA	AA	AA	AA	GA	AA	AA	AA	GG	AA	GG	AA	AA	AA	AA	AA
SSL2.50ch01_85691643	A	G	AA	AA	AA	AA	AA	GA	AA	AA	AA	AA	AA	AA	GG	GG	GA	AA	AA	AA	AA	NN	GA	AA	AA	AA	AA	AA	AA	AA	AA	AA	AA	AA	AA	AA	AA	AA	AA	GG	AA	AA	AA	AA	AA	AA	AA	AA	AA
SSL2.50ch01_85700873	C	T	CC	CC	CC	TT	CC	CC	CC	CC	TT	CC	CC	CC	CC	CC	CC	CC	CC	CC	CC	CC	CC	TC	CC	CC	CC	NN	CC	CC	CC	CC	CC	CC	CC	CC	CC	CC	CC	TT	CC	CC	CC	CC	CC	CC	CC	CC	CC
SSL2.50ch01_85700874	A	G	AA	AA	AA	AA	GG	AA	AA	GG	AA	AA	AA	AA	AA	AA	AA	GG	AA	AA	GG	GG	GA	AA	AA	GG	GA	NN	AA	GA	GG	GG	GG	GG	AA	AA	AA	AA	AA	AA	AA	AA	GG	AA	AA	AA	AA	AA	AA
SSL2.50ch01_85700933	A	T	AA	AA	AA	TT	AA	NN	AA	AA	TT	AA	AA	AA	TT	TT	AA	AA	AA	AA	AA	AA	TA	TA	AA	AA	AA	NN	AA	AA	AA	AA	AA	AA	AA	AA	AA	AA	AA	TT	AA	AA	AA	AA	AA	AA	AA	AA	AA
SSL2.50ch01_85743938	A	T	AA	AA	AA	AA	AA	AT	AA	AA	TT	AT	AA	AA	TT	TT	AT	AA	AA	AA	AA	AA	AT	AT	AA	AA	AA	TT	AA	AA	AA	AA	AA	AA	AA	AA	AA	AA	AA	AA	AA	AA	AA	AA	AA	AA	AA	AA	AA
SSL2.50ch01_85743948	C	T	CC	CC	CC	CC	CC	CT	CC	CC	TT	CT	CC	CC	TT	TT	CT	CC	CC	CC	CC	CC	CT	CT	CC	CC	CC	TT	CC	CC	CC	CC	CC	CC	CC	CC	CC	CC	CC	CC	CC	CC	CC	CC	CC	CC	CC	CC	CC
SSL2.50ch01_85752701	G	A	GG	GG	NN	NN	GG	GG	GG	GG	GG	GA	GG	AA	GG	GG	GG	GG	GG	GG	GG	GG	GG	NN	GG	GG	GG	GG	GG	GG	GG	GG	GG	GG	GG	GG	GG	GG	GG	GG	GG	GG	GG	GG	GG	GG	GG	GG	GG
SSL2.50ch01_85752712	T	C	TT	TT	NN	NN	TT	TT	TT	TT	TT	TT	TT	TT	TT	TT	TT	TT	CC	CC	TT	TT	TT	NN	TT	TT	TC	TT	TT	TT	TT	TT	TT	TT	TT	TT	TT	TT	TT	TT	TT	CC	TT	TT	TT	TT	TT	TT	TT
SSL2.50ch01_85752730	C	G	NN	CC	NN	NN	NN	CC	GG	GG	CC	CC	CC	CC	CC	CC	GC	GG	CC	CC	GG	GG	GC	NN	CC	GG	GC	CC	CC	CC	GG	GG	GG	GG	GG	NN	CC	GC	CC	NN	CC	CC	GG	GG	CC	GG	GC	GG	GG
SSL2.50ch01_85752778	A	C	AA	AA	NN	NN	AA	AA	AA	AA	AA	CA	AA	CC	AA	AA	AA	AA	AA	AA	AA	AA	AA	NN	AA	AA	AA	AA	AA	AA	AA	AA	AA	AA	AA	AA	AA	AA	AA	AA	AA	AA	AA	AA	AA	AA	AA	AA	AA
SSL2.50ch01_85785544	T	C	TT	TT	TT	CC	TT	TT	TT	NN	NN	TT	TT	CC	CC	CC	TT	TT	TT	TT	NN	TT	CT	CT	NN	NN	TT	CC	TT	TT	TT	TT	TT	TT	TT	NN	TT	TT	CC	CC	NN	NN	TT	TT	TT	TT	TT	TT	NN
SSL2.50ch01_85789416	A	T	AA	AA	AA	AA	AA	AT	AA	AA	AA	AT	TT	AA	AA	AA	AT	AA	AA	AA	AA	AA	AA	AA	AA	AA	AA	AA	AA	AA	AA	AA	AA	AA	AA	AA	AA	AA	AA	AA	AA	AA	AA	AA	AA	AA	AA	AA	AA
SSL2.50ch01_85827097	A	T	AA	AA	AA	AA	AA	AA	AA	AA	AA	AA	AA	AA	AA	AA	AT	TT	AA	AA	AA	AA	AT	AT	AA	AA	TT	AA	AA	AA	AA	AA	AA	AA	AA	AA	AA	AA	AA	AA	AA	AA	TT	AA	AA	AA	AA	AA	AA
SSL2.50ch01_85829140	A	G	GG	AA	AA	NN	AA	AA	AA	NN	GG	GG	GG	GG	AA	AA	GA	AA	AA	AA	AA	AA	AA	AA	AA	AA	AA	GG	AA	AA	AA	AA	AA	AA	AA	AA	AA	AA	AA	AA	AA	AA	AA	AA	GG	AA	AA	AA	AA
SSL2.50ch01_85850839	A	G	AA	AA	AA	AA	GG	AA	AA	AA	AA	AG	AA	GG	AA	AA	AA	AA	AA	AA	AA	AA	AA	AA	AA	AA	AA	AA	AA	AG	AA	AA	AA	AA	AA	AA	AA	AA	AA	AA	AA	AA	AA	AA	AA	AA	AA	AA	AA
SSL2.50ch01_85850858	C	T	CC	TT	CC	CC	CC	CC	TT	TT	TT	CT	CC	CC	CC	CC	CC	CC	CT	TT	CC	TT	CT	CC	TT	CC	CT	CC	TT	CC	CC	CC	CC	TT	CC	TT	CC	CT	TT	TT	TT	CC	CC	TT	CC	CC	CC	CC	TT
SSL2.50ch01_85850910	C	A	CC	CC	CC	CC	AA	CC	CC	CC	CC	AC	CC	AA	CC	CC	CC	CC	CC	CC	CC	CC	CC	CC	CC	CC	CC	CC	CC	AC	CC	CC	CC	CC	CC	CC	CC	CC	CC	CC	CC	CC	CC	CC	CC	CC	CC	CC	CC
SSL2.50ch01_85864400	T	C	TT	TT	CC	TT	TT	TT	CC	TT	NN	TT	TT	TT	TT	TT	TT	TT	TT	TT	TT	TT	TT	TT	TT	TT	TT	TT	TT	TT	TT	TT	TT	TT	TT	TT	TT	TT	TT	TT	TT	TT	TT	CC	TT	TT	TT	TT	CC
SSL2.50ch01_85864548	C	A	CC	CC	CC	CC	CC	AA	CC	CC	AA	AC	AA	AA	AA	AA	CC	CC	CC	CC	CC	CC	AC	AC	CC	CC	CC	AA	CC	CC	CC	CC	CC	CC	CC	CC	CC	CC	CC	CC	CC	CC	CC	CC	CC	CC	CC	CC	CC
SSL2.50ch01_85884419	A	G	AA	AA	AA	AA	AA	GG	AA	AA	GG	GG	GG	GG	GG	GG	AG	AA	AA	AA	AA	AA	AG	AG	GG	AA	AA	GG	AA	AA	AA	AA	AA	AA	AA	AA	AA	AA	AA	GG	AA	AA	AA	AA	AA	AA	AA	AA	AA
SSL2.50ch01_85930969	C	T	CC	CC	CC	CC	CC	CC	CC	CC	CC	CC	TT	CC	CC	CC	CC	CC	CC	CC	CC	CC	CC	CC	CC	CC	CC	CC	CC	CC	CC	CC	CC	CC	CC	CC	CC	CC	CC	CC	CC	CC	CC	CC	CC	CC	CC	CC	CC
SSL2.50ch01_85962100	G	T	TT	GG	GG	GG	GG	TG	GG	GG	GG	TT	GG	TT	GG	GG	TT	GG	TG	TT	TT	GG	TG	TG	TT	TT	TT	GG	TG	GG	TT	GG	TT	GG	GG	TT	GG	TG	GG	GG	GG	GG	GG	GG	TT	GG	GG	GG	GG
SSL2.50ch01_85962159	G	T	TT	GG	GG	GG	GG	NN	GG	GG	GG	GG	GG	GG	GG	NN	GT	GG	GT	TT	TT	GG	GT	TT	TT	TT	TT	GG	GT	GG	TT	GG	TT	GG	GG	TT	GG	GT	GG	TT	GG	GG	GG	GG	TT	GG	GG	GG	GG
SSL2.50ch01_85962208	G	A	GG	GG	AA	GG	AA	NN	GG	GG	AA	GG	GG	GG	AA	NN	GG	GG	GG	GG	GG	GG	AG	GG	GG	GG	GG	GG	AG	AG	GG	GG	GG	GG	GG	GG	AA	GG	GG	GG	AA	AA	GG	AA	GG	GG	GG	GG	GG
SSL2.50ch01_85964427	A	G	AA	AA	AA	AA	AA	AG	AA	AA	AA	AA	AA	AA	AA	AA	AA	AA	AA	AA	AA	NN	AA	AA	AA	AA	AA	AA	AA	AA	NN	AA	AA	AA	AA	NN	AA	AA	AA	AA	AA	AA	AA	AA	AA	AA	AA	AA	AA
SSL2.50ch01_85972678	T	C	TT	TT	TT	CC	CC	CC	TT	TT	NN	CC	CC	CC	CC	NN	CT	TT	CT	CC	TT	TT	CT	CT	CT	TT	CT	CC	TT	TT	TT	TT	TT	TT	TT	TT	TT	TT	TT	TT	TT	CC	TT	TT	NN	TT	TT	TT	TT
SSL2.50ch01_85979328	T	C	TT	TT	TT	TT	TT	CT	TT	TT	TT	TT	TT	TT	TT	CC	TT	TT	CT	CC	TT	TT	CT	CT	TT	TT	CT	TT	TT	TT	TT	TT	TT	TT	TT	TT	TT	CT	TT	TT	TT	TT	TT	TT	CT	TT	CT	TT	TT
SSL2.50ch01_85990118	T	C	TT	TT	TT	TT	CC	CT	TT	TT	CC	TT	TT	TT	CC	CC	TT	TT	TT	TT	TT	TT	CT	CT	TT	TT	TT	CC	TT	TT	TT	TT	TT	TT	TT	TT	TT	TT	TT	TT	TT	TT	TT	TT	TT	TT	TT	TT	TT
SSL2.50ch01_86001814	G	A	GG	GG	GG	GG	GG	AA	GG	GG	NN	GG	GG	GG	GG	AA	GG	GG	GG	GG	GG	GG	GA	GA	GG	GG	NN	AA	GG	GG	GG	GG	GG	GG	GG	GG	GG	NN	GG	GG	GG	GG	GG	GG	GG	GG	GG	GG	GG
SSL2.50ch01_86035776	G	T	TT	GG	GG	GG	GG	GG	GG	GG	NN	GG	GG	GG	GG	GG	GG	GG	GT	TT	GG	GG	GG	GG	GG	GG	GG	GG	GG	GG	GG	GG	GG	GG	GG	GG	GG	GG	GG	GG	GG	GG	GG	GG	GG	GG	GG	GG	GG
SSL2.50ch01_86039648	C	T	CC	CC	CC	NN	CC	CC	CC	CC	TT	TC	TT	TT	TT	NN	CC	CC	CC	CC	CC	CC	CC	CC	NN	NN	NN	TT	NN	CC	CC	CC	CC	CC	NN	CC	CC	NN	CC	CC	CC	CC	CC	CC	CC	CC	CC	CC	CC
SSL2.50ch01_86046171	T	A	TT	TT	TT	TT	TT	NN	TT	TT	NN	AT	AA	AA	AA	NN	TT	TT	TT	TT	TT	TT	TT	TT	TT	NN	TT	AA	TT	TT	TT	TT	TT	TT	TT	TT	TT	TT	TT	TT	TT	TT	TT	TT	TT	TT	TT	TT	TT
SSL2.50ch01_86072280	A	T	AA	TT	AA	AA	AA	TT	AA	AA	TT	TT	TT	TT	TT	TT	TT	TT	TT	TT	TT	AA	TA	TT	AA	TT	AA	TT	AA	TA	AA	TT	AA	AA	TT	TT	AA	AA	AA	AA	AA	TT	AA	AA	TA	AA	AA	TT	TT
SSL2.50ch01_86072310	C	A	CC	CC	CC	CC	CC	CC	CC	CC	CC	CC	CC	CC	CC	CC	CC	CC	CC	CC	CC	AA	CA	CC	CC	CC	AA	CC	CC	CC	CC	CC	CC	AA	CC	CC	CC	CC	CC	CC	CC	CC	CC	CC	CC	CC	CC	CC	CC
SSL2.50ch01_86091260	C	T	CC	CC	NN	CC	CC	TC	CC	CC	CC	TT	TT	TT	TT	TT	TC	CC	CC	CC	CC	CC	TC	TC	TT	CC	CC	CC	CC	CC	CC	CC	CC	CC	CC	CC	TT	CC	CC	CC	CC	CC	CC	CC	CC	CC	CC	CC	CC
SSL2.50ch01_86091334	G	A	GG	GG	NN	NN	GG	NN	GG	GG	GG	AA	AA	AA	AA	AA	AA	GG	GG	GG	NN	NN	AG	AG	AA	GG	GG	GG	GG	GG	GG	GG	GG	GG	GG	GG	AA	GG	NN	NN	GG	GG	GG	GG	GG	GG	GG	GG	GG
SSL2.50ch01_86093661	A	G	AA	AA	AA	AA	AA	GG	AA	AA	GG	AG	AA	AA	AA	GG	AG	AA	AA	AA	AA	NN	AG	AG	AA	AA	AA	AA	AA	AA	AA	AA	AA	AA	AA	AA	AA	AA	AA	AA	AA	AA	AA	AA	AA	AA	AA	AA	NN
SSL2.50ch01_86095539	C	T	CC	CC	CC	CC	CC	NN	CC	CC	NN	TC	CC	TT	TT	CC	CC	CC	CC	CC	CC	NN	CC	CC	TT	CC	CC	TT	CC	CC	CC	CC	CC	CC	CC	CC	TT	CC	CC	CC	CC	CC	CC	CC	CC	CC	CC	CC	CC
SSL2.50ch01_86109215	A	G	AA	GG	AA	GG	AA	AA	AA	GG	AA	AA	AA	AA	AA	AA	AA	AA	AG	GG	AA	AA	AA	AA	AA	AA	AA	AA	AA	AA	AA	AA	AA	AA	AA	AA	AA	AA	AA	AA	AA	GG	AA	AA	NN	AA	AA	AA	AA
SSL2.50ch01_86131125	A	T	AA	AA	AA	AA	AA	AT	AA	AA	TT	AA	AA	AA	TT	TT	AT	AA	AA	AA	AA	AA	AT	AT	AA	AA	AA	AA	AA	AA	AA	AA	AA	AA	AA	AA	AA	AA	AA	AA	AA	AA	AA	AA	AA	AA	AA	AA	AA
SSL2.50ch01_86140983	A	G	AA	AA	AA	AA	AA	AA	AA	AA	GG	AA	AA	AA	AA	AA	AG	AA	AA	AA	AA	AA	AA	AA	AA	AA	AA	GG	AA	AA	AA	AA	AA	AA	AA	AA	AA	AA	AA	AA	AA	AA	AA	AA	AA	AA	AA	AA	AA
SSL2.50ch01_86161502	C	A	CC	CC	CC	AA	CC	CC	CC	CC	CC	CC	CC	CC	CC	CC	CC	CC	CC	CC	CC	CC	CC	CC	CC	CC	CC	AA	CC	CC	CC	CC	CC	CC	CC	CC	CC	CC	CC	CC	CC	CC	CC	CC	CC	CC	CC	CC	CC
SSL2.50ch01_86161518	C	A	CC	CC	CC	CC	CC	CC	CC	CC	CC	CC	AA	CC	CC	CC	CC	CC	CC	CC	CC	CC	CC	CC	CC	CC	CC	CC	CC	CC	CC	CC	CC	CC	CC	CC	CC	CC	CC	CC	CC	CC	CC	CC	CC	CC	CC	CC	CC
SSL2.50ch01_86161526	C	T	CC	CC	CC	TT	CC	CC	CC	CC	CC	CC	CC	CC	CC	CC	CC	CC	CC	CC	CC	CC	CC	CC	CC	CC	CC	TT	CC	CC	CC	CC	CC	CC	CC	CC	CC	CC	CC	CC	CC	CC	CC	CC	CC	CC	CC	CC	CC
SSL2.50ch01_86161552	T	C	TT	TT	TT	TT	TT	TC	TT	TT	TT	TT	CC	TC	TT	CC	TT	TT	TT	TT	TT	TT	TC	TC	TT	TT	TT	TT	TT	CC	TT	TT	TT	TT	TT	TT	TT	TT	TT	TT	TT	TT	TT	TT	TT	TT	TT	TT	TT
SSL2.50ch01_86161570	C	T	CC	CC	CC	NN	CT	CC	CC	CC	CC	CC	CC	CC	CC	CC	CC	CC	CC	CC	CC	CC	CC	CC	CC	CC	CT	NN	CT	CC	CC	CC	CC	CC	CC	CC	CC	CT	CC	CC	CT	CC	CC	CC	CC	CC	CC	CC	CC
SSL2.50ch01_86161572	C	T	CC	CC	CC	NN	CT	CC	CC	CC	CC	CC	CC	CC	CC	CC	CC	CC	CC	CC	CC	CC	CC	CC	CC	CC	CT	NN	CT	CC	CC	CC	CC	CC	CC	CC	CC	CT	CC	CC	CT	CC	CC	CC	CC	CC	CC	CC	CC
SSL2.50ch01_86161584	T	A	TT	TT	TT	NN	AT	AT	TT	TT	TT	TT	AA	TT	TT	AA	TT	TT	TT	TT	TT	TT	AT	AT	TT	TT	AT	NN	AT	AA	TT	TT	TT	TT	TT	TT	TT	AT	TT	TT	AT	TT	TT	TT	TT	TT	TT	TT	TT
SSL2.50ch01_86161593	A	G	AA	AA	AA	NN	AG	AA	AA	AA	AA	AA	AA	AA	AA	AA	AA	AA	AA	AA	AA	AA	AA	AA	AA	AA	AG	NN	AG	AA	AA	AA	AA	AA	AA	AA	AA	AG	AA	AA	AG	AA	AA	AA	AA	AA	AA	AA	AA
SSL2.50ch01_86161599	T	A	TT	TT	TT	NN	AT	TT	TT	TT	TT	TT	TT	TT	TT	TT	TT	TT	TT	TT	TT	TT	TT	TT	TT	TT	AT	NN	AT	TT	TT	TT	TT	TT	TT	TT	TT	AT	TT	TT	AT	TT	TT	TT	TT	TT	TT	TT	TT
SSL2.50ch01_86161636	G	C	GG	GG	GG	NN	GG	GG	GG	GG	GG	GG	CC	GG	GG	GG	GG	GG	GG	GG	GG	GG	GG	GG	GG	GG	GG	NN	GG	GG	GG	GG	GG	GG	GG	GG	GG	GG	GG	GG	GG	GG	GG	GG	GG	GG	GG	GG	GG
SSL2.50ch01_86176646	A	G	AA	AA	AA	AA	AA	GA	AA	AA	AA	GG	AA	GG	AA	GG	AA	GG	AA	AA	AA	GG	GG	GA	AA	AA	GA	AA	AA	GG	GG	AA	GG	GG	AA	GG	AA	GA	AA	AA	AA	AA	GG	AA	GA	AA	AA	AA	AA
SSL2.50ch01_86178243	C	G	CC	CC	CC	CC	CC	CG	CC	CC	CC	GG	CC	GG	CC	GG	CC	GG	CC	CC	CC	GG	GG	CG	CC	CC	CG	CC	CC	GG	GG	CC	GG	GG	CC	GG	CC	CG	CC	CC	CC	CC	GG	CC	CG	CC	CC	CC	CC
SSL2.50ch01_86178268	T	G	TT	TT	TT	TT	TT	GT	TT	TT	TT	GG	TT	GG	TT	GG	TT	GG	TT	TT	TT	GG	GG	GT	TT	TT	GT	TT	TT	GG	GG	TT	GG	GG	TT	GG	TT	GT	TT	TT	TT	TT	GG	TT	GT	TT	TT	TT	TT
SSL2.50ch01_86187441	A	G	AA	GG	AA	AA	AA	GG	AA	AA	AA	GG	AA	GG	AA	GG	GG	GG	AA	AA	AA	AA	AG	GG	AA	AA	AG	GG	AA	GG	GG	GG	GG	AA	GG	GG	AA	AG	AA	AA	AA	AA	GG	AA	AA	AA	AG	AA	AA
SSL2.50ch01_86187494	G	A	GG	GG	GG	GG	GG	AG	GG	GG	GG	AA	GG	AA	GG	AA	AG	AA	GG	GG	GG	GG	AG	AG	GG	GG	AG	AA	GG	AA	AA	GG	AA	GG	GG	AA	GG	AG	GG	GG	GG	GG	AA	GG	GG	GG	GG	GG	GG
SSL2.50ch01_86210597	C	T	CC	TT	CC	TT	CC	TT	TT	CC	TT	TT	CC	TT	TT	TT	TC	CC	TC	CC	TT	CC	TC	TC	CC	TT	CC	TT	CC	TC	CC	CC	CC	CC	CC	CC	TT	CC	TT	CC	CC	TT	CC	TT	CC	CC	TC	CC	CC
SSL2.50ch01_86242407	G	C	GG	GG	GG	CC	GG	GC	GG	GG	CC	CC	GG	CC	CC	CC	GG	GG	GG	GG	GG	CC	CC	GC	GG	GG	GC	CC	GG	GC	GG	GG	GG	CC	GG	GG	GG	GG	GG	GG	GG	GG	GG	CC	GG	GG	GC	GG	GG
SSL2.50ch01_86251615	G	A	GG	GG	GG	GG	GG	AG	GG	GG	GG	GG	GG	GG	AA	AA	AG	GG	GG	GG	GG	GG	AG	AG	GG	GG	GG	AA	GG	GG	GG	GG	GG	GG	GG	GG	GG	GG	GG	GG	GG	GG	GG	GG	GG	GG	GG	GG	GG
SSL2.50ch01_86257918	A	T	AA	TT	NN	TT	TT	TT	TT	AA	NN	AT	TT	TT	TT	TT	TT	AA	AA	AA	TT	AA	TT	TT	TT	TT	TT	TT	AT	AA	NN	AA	TT	AA	AA	AA	AA	TT	AA	TT	AA	AA	AA	AA	TT	AA	AT	AA	TT
SSL2.50ch01_86257986	A	T	AA	TT	NN	AA	AA	TT	TT	AA	NN	AT	TT	TT	TT	TT	TT	AA	AA	AA	TT	AA	TT	TT	AA	TT	TT	TT	AT	AA	NN	AA	TT	AA	AA	AA	AA	TT	AA	AA	AA	AA	AA	AA	TT	AA	AT	AA	TT
SSL2.50ch01_86259045	C	A	CC	CC	CA	CC	CC	AA	CC	CC	NN	CC	CC	CC	AA	AA	CC	CC	CC	CC	CC	CC	CA	CA	CC	CC	CC	AA	CC	CC	CC	CC	CC	CC	CC	CC	CC	CC	CC	CC	CC	CC	CC	CC	CC	CC	CC	CC	CC
SSL2.50ch01_86262447	G	C	GG	GG	GG	GG	GG	NN	GG	GG	GG	GG	GG	GG	GG	CC	GG	GG	GG	GG	GG	GG	CG	CG	GG	GG	GG	CC	GG	GG	GG	GG	GG	GG	GG	GG	GG	GG	GG	GG	GG	GG	GG	GG	GG	GG	GG	GG	GG
SSL2.50ch01_86272877	C	T	CC	CC	CC	TC	CC	CC	CC	CC	NN	CC	CC	CC	CC	CC	CC	CC	CC	CC	CC	NN	CC	CC	CC	CC	NN	CC	CC	CC	NN	CC	CC	CC	CC	CC	CC	NN	CC	NN	TT	TT	CC	TT	TC	CC	CC	CC	CC
SSL2.50ch01_86276612	C	A	CC	CC	CC	CC	CC	CC	CC	CC	CC	CC	CC	CC	CC	CC	CC	CC	CA	AA	CC	CC	CC	CC	CC	CC	CC	CC	CC	CA	CC	CC	CC	CC	AA	CC	CC	CC	CC	CC	CC	CC	CC	CC	CC	CC	CA	AA	CC
SSL2.50ch01_86283479	T	A	TT	TT	TT	TT	AA	AA	TT	TT	AA	AA	AA	AA	AA	AA	AT	TT	AT	AA	TT	TT	AT	AT	TT	TT	TT	AA	TT	AA	TT	TT	TT	TT	AA	TT	TT	TT	TT	AA	TT	TT	TT	TT	TT	TT	AT	AA	TT
SSL2.50ch01_86291051	G	C	GG	GG	GG	GG	GG	GC	GG	GG	GG	GC	GG	CC	GG	CC	GG	GG	GG	GG	NN	GG	GC	GC	GG	NN	GG	CC	GG	GG	GG	GG	GG	GG	GG	NN	GG	GG	GG	GG	GG	GG	GG	GG	GG	GG	GG	GG	GG
SSL2.50ch01_86336227	G	A	GG	GG	GG	GG	GG	GA	GG	GG	GG	AA	GG	AA	GG	GG	GG	GG	GG	GG	GG	GG	GG	GG	GG	GG	GG	GG	GG	GG	GG	GG	GG	GG	GG	GG	GG	GG	GG	GG	GG	GG	GG	GG	GG	GG	GG	GG	GG
SSL2.50ch01_86336258	G	A	GG	GG	GG	GG	GG	GA	GG	GG	GG	AA	GG	AA	GG	GG	GG	GG	GG	GG	GG	GG	GG	GG	GG	GG	GG	GG	GG	GG	GG	GG	GG	GG	GG	GG	GG	GG	GG	GG	GG	GG	GG	GG	GG	GG	GG	GG	GG
SSL2.50ch01_86339128	G	A	GG	GG	GG	NN	GG	NN	GG	NN	AA	GG	AA	GG	AA	GG	GG	GG	GG	GG	GG	GG	GG	NN	GG	GG	GG	GG	NN	GG	NN	GG	GG	GG	GG	GG	GG	GG	GG	GG	GG	GG	GG	GG	GG	GG	GG	GG	GG
SSL2.50ch01_86377580	T	C	CC	TT	CC	CC	TT	TT	TT	TT	TT	TT	TT	TT	TT	TT	TT	TT	TC	CC	TT	TT	TT	TT	TT	TT	TT	TT	TC	TT	TT	TT	TT	TT	TT	TT	CC	TC	TT	TT	CC	TT	TT	CC	TC	TT	TC	TT	TT
SSL2.50ch01_86397877	C	T	CC	CC	CC	CC	CC	CT	CC	CC	CC	CT	CC	TT	CC	TT	CC	CC	CC	CC	CC	CC	CT	CT	CC	CC	CC	TT	CC	CC	CC	CC	CC	CC	CC	CC	CC	CC	CC	CC	CC	CC	CC	CC	CC	CC	CC	CC	CC
SSL2.50ch01_86402766	T	C	TT	TT	TT	TT	TT	CT	TT	TT	TT	CT	TT	CC	TT	CC	TT	TT	TT	TT	TT	TT	CT	TT	TT	TT	TT	CC	TT	CT	TT	TT	TT	TT	TT	TT	TT	TT	TT	TT	TT	CC	TT	TT	TT	TT	TT	TT	TT
SSL2.50ch01_86412083	C	T	CC	CC	CC	CC	CC	TC	CC	CC	NN	TC	CC	CC	TT	NN	CC	CC	CC	CC	CC	CC	CC	NN	CC	CC	CC	TT	TC	NN	CC	CC	CC	NN	CC	CC	TT	NN	CC	CC	CC	CC	CC	CC	NN	CC	CC	CC	CC
SSL2.50ch01_86414747	A	G	AA	AA	AA	AA	AA	AA	AA	AA	AA	AG	GG	GG	AA	AA	AA	AA	AA	AA	AA	AA	AA	AA	AA	AA	AA	AA	AA	AA	AA	AA	AA	AA	AA	AA	AA	AA	AA	AA	AA	AA	AA	AA	AA	AA	AA	AA	AA
SSL2.50ch01_86431978	A	T	TT	AA	AA	AA	AA	AA	TT	AA	AA	AA	AA	AA	AA	AA	AT	AA	AA	AA	AA	TT	AA	AT	AA	AA	AA	AA	AT	AA	TT	AA	TT	TT	AA	AA	AA	AA	TT	AA	AA	AA	AA	AA	TT	AA	AA	AA	AA
SSL2.50ch01_86431994	T	A	TT	TT	TT	TT	TT	AT	TT	TT	AA	AT	TT	AA	TT	TT	AT	TT	TT	TT	TT	TT	TT	AT	TT	TT	TT	TT	TT	TT	TT	TT	TT	TT	TT	TT	TT	TT	TT	TT	TT	TT	TT	TT	TT	TT	TT	TT	TT
SSL2.50ch01_86476384	T	C	TT	TT	TT	TT	TT	CT	TT	TT	CC	CC	TT	CC	TT	TT	CT	TT	TT	TT	TT	TT	TT	TT	TT	TT	TT	TT	TT	CT	TT	TT	TT	TT	TT	TT	TT	TT	TT	TT	TT	TT	TT	TT	TT	TT	TT	TT	TT
SSL2.50ch01_86502698	A	T	AA	AA	AA	AA	AA	AA	AA	AA	AA	AA	AA	AA	AA	AA	AA	AA	AA	AA	TT	AA	AA	AA	AA	TT	AA	AA	AA	AA	AA	AA	AA	AA	AA	AA	AA	AT	AA	TT	TT	TT	AA	TT	AA	AA	AA	AA	AA
[truncated: 22,332 more rows]
[truncated: 51 more columns]
